# Supplementary material for: Dual protective layer on lithium metal anodes for improved electrochemical performance – in-depth morphological characterization
Source: Royal Society of Chemistry journal article supplement (doi:10.1039/d4ta06366j), 2025-01-01
Supplement: d4ta06366j1.xlsx [file d4ta06366j1.xlsx]

## Sheet: Raman spectroscopy
Name	Raman Shift	Intensity	Raman Shift	Intensity	Raman Shift	Intensity
Unit	[cm-1]	a.u.	[cm-1]	a.u.	[cm-1]	a.u.
Comment		Li3N at Li		pure Li3N		Li Referenz
	104197	4326833	524381	441	104197	-26005007
	107928	15454728	561928	420.5	107928	-5073386
	111659	17225203	599439	708.5	111659	3790947
	115.39	9470168	636935	838.5	115.39	1008561
	119117	6951928	674438	665	119117	10043919
	122843	1046986	711904	848	122843	6782258
	126568	-267264	749376	986.5	126568	17134157
	130293	-4800984	786812	980.5	130293	17961671
	134014	2509046	824233	801.5	134014	37269419
	137734	6595443	861661	983	137734	36732451
	141453	670297	899052	757	141453	26481308
	145172	496787	936428	946	145172	29327966
	148888	-2037864	973811	856	148888	40538618
	152602	-950056	101116	770	152602	30945267
	156314	-5891167	104849	732	156314	34588454
	160028	-1320738	108.58	916	160028	41824304
	163737	3157508	112313	716.5	163737	46493493
	167445	-149543	116041	701	167445	40912142
	171152	6152563	119769	736.5	171152	49770726
	174857	-5075049	123494	708.5	174857	43058354
	178563	5147778	127221	703	178563	46679559
	182265	-3872944	130943	682.5	182265	42868046
	185966	-172513	134665	658	185966	48378334
	189666	5755748	138384	649.5	189666	5477086
	193363	535658	142105	713	193363	5015344
	197.06	3618307	145822	637.5	197.06	43910451
	200755	-2555515	149537	628.5	200755	58619706
	204448	303866	153251	612.5	204448	58191645
	208142	3801403	156963	642.5	208142	43340511
	211833	7646975	160674	606	211833	58521605
	215522	-2880069	164385	606.5	215522	61866627
	219209	14777275	168093	595.5	219209	55275991
	222896	0.83112	171.8	608.5	222896	66642573
	226.58	7191448	175505	581	226.58	63593046
	230263	15693708	179208	595.5	230263	61790266
	233945	16751486	182.91	595.5	233945	57084598
	237625	10854545	186611	593	237625	62535199
	241304	14528601	190312	591	241304	64043642
	244982	9182489	194009	570.5	244982	78090274
	248657	12807898	197706	562	248657	71023088
	252332	12108714	201.4	551	252332	70665972
	256005	11169243	205093	567.5	256005	67876918
	259676	28228589	208785	567	259676	84596278
	263346	17190011	212475	576	263346	78505543
	267015	1524917	216164	564	267015	7062503
	270682	2789829	219852	549.5	270682	73063927
	274348	20460061	223537	565	274348	76073687
	278012	25660463	227222	533.5	278012	82403503
	281675	33298852	230905	550.5	281675	84614803
	285336	32645997	234586	540	285336	92856786
	288996	35904947	238266	551	288996	84060857
	292655	43719414	241945	551	292655	91297305
	296312	35564888	245622	561	296312	101675338
	299965	37178755	249298	543.5	299965	12097312
	303.62	47595003	252972	546.5	303.62	106627361
	307272	54104516	256645	545.5	307272	120682998
	310923	6231868	260316	525	310923	125552435
	314573	58198622	263986	542.5	314573	121585938
	318222	71950391	267654	542	318222	133743769
	321869	71922986	271321	540.5	321869	130695158
	325514	76259356	274986	544.5	325514	140330378
	329156	93973443	278648	555.5	329156	135728686
	332799	97902784	282311	539	332799	145734401
	336.44	105375264	285972	558	336.44	151174723
	340.08	112839451	289632	554.5	340.08	140420906
	343718	97580049	293.29	554.5	343718	1558022
	347353	94579766	296947	558	347353	173287874
	350988	105241682	300602	563.5	350988	175181127
	354622	93832339	304256	575	354622	193181198
	358255	93789104	307906	564	358255	186028313
	361884	104015893	311557	583	361884	195329815
	365513	10586025	315207	592.5	365513	202149791
	369142	108878367	318855	596	369142	207848439
	372769	105547871	322502	621.5	372769	218864071
	376392	113366451	326145	660	376392	218685045
	380016	113048019	329789	684	380016	227946269
	383639	120670125	333431	701.5	383639	234646067
	387258	117685669	337072	740.5	387258	235811884
	390877	125453575	340711	723	390877	244437623
	394496	130142785	344347	719	394496	245543465
	398113	146678848	347984	654	398113	240347784
	401726	141103368	351619	634.5	401726	242858994
	405.34	155373634	355251	631	405.34	258841792
	408951	153374838	358883	601	408951	255152788
	412562	165323798	362514	593.5	412562	258064842
	416172	174212661	366144	590	416172	267927244
	419778	175475341	369.77	598	419778	275147563
	423385	191412754	373396	591.5	423385	255940352
	426.99	193276766	377021	589	426.99	259113174
	430592	194022522	380643	591	430592	275945362
	434195	210506125	384265	592.5	434195	259860522
	437794	213513295	387886	595.5	437794	250534562
	441394	226013625	391504	592	441394	2559019
	444991	226980446	395122	596.5	444991	274879327
	448588	232408092	398736	600	448588	26395953
	452183	243692045	402351	613	452183	268211001
	455776	248803911	405965	628	455776	262723915
	459368	259833815	409576	631	459368	262849261
	462958	258046782	413187	625.5	462958	26026638
	466548	264556411	416794	650.5	466548	270197057
	470134	26508015	420402	645	470134	277448215
	473721	274073102	424009	665.5	473721	272064041
	477305	288463722	427612	679	477305	266681476
	480.89	293794504	431216	688.5	480.89	279693856
	484471	300281442	434816	674.5	484471	271707367
	488.05	310939011	438417	691.5	488.05	286113757
	491.63	3321151	442015	704.5	491.63	278595511
	495207	370093228	445613	719	495207	28346965
	498784	389831241	449208	721	498784	289918644
	502358	420677162	452803	738.5	502358	297100323
	505933	432083232	456395	765.5	505933	28690789
	509504	430487575	459988	746	509504	289147668
	513074	432731944	463577	762.5	513074	308552085
	516644	442207146	467167	755	516644	30534202
	520211	442502235	470753	774	520211	297225353
	523777	434538445	474.34	786	523777	290043719
	527343	42425654	477924	753.5	527343	292447979
	530906	437845594	481506	774	530906	300276048
	534469	441467197	485088	771.5	534469	307170257
	538029	436330435	488668	795.5	538029	304648542
	541588	432716451	492248	812	541588	296372487
	545145	437005153	495824	841	545145	307011495
	548703	434208028	499399	905	548703	302207835
	552258	433283787	502975	953	552258	295178759
	555811	425143125	506547	1015	555811	292185112
	559365	428927467	510118	1038	559365	290569126
	562915	428545186	513.69	1043	562915	305767395
	566464	438507694	517258	1029.5	566464	29559215
	570011	455064882	520825	1040	570011	307402808
	573.56	473688465	524392	1004.5	573.56	300052241
	577104	479566144	527956	1041	577104	295525731
	580648	500579979	531519	1046.5	580648	305936833
	584.19	535319493	535082	1048.5	584.19	292194285
	587733	562235968	538642	1044	587733	285460225
	591272	577337891	542.2	1076.5	591272	28900138
	594.81	585306534	545757	1090	594.81	291439884
	598346	599281775	549315	1086	598346	288605173
	601881	589824169	552869	1114	601881	278778017
	605415	574493922	556422	1116.5	605415	268858516
	608.95	565991886	559973	1141.5	608.95	280308074
	612481	540786627	563525	1170	612481	298013512
	616.01	522939005	567074	1161	616.01	273956251
	619539	507229852	570621	1205	619539	287007682
	623066	487268717	574167	1265.5	623066	290356608
	626591	479215791	577712	1330.5	626591	272783129
	630115	485681567	581257	1394.5	630115	28915798
	633638	490906217	584799	1504	633638	302821252
	637162	473310515	588339	1656.5	637162	291104293
	640682	471773119	591878	1747	640682	282024041
	644201	462565105	595416	1832.5	644201	284172481
	647718	470216339	598952	1859	647718	303279078
	651234	484087276	602489	1871	651234	291214544
	654749	47653807	606023	1830	654749	297028965
	658262	489378586	609555	1746.5	658262	281591811
	661774	496339262	613086	1640.5	661774	297413783
	665284	495289963	616615	1581.5	665284	301854358
	668794	504841391	620143	1438.5	668794	31054483
	672301	494822856	623.67	1380.5	672301	296833472
	675808	501845323	627195	1292.5	675808	306332171
	679313	48272838	630719	1226	679313	301059809
	682817	488172431	634242	1168	682817	304207064
	686319	456887342	637763	1105.5	686319	306623423
	689.82	436843506	641283	1094	689.82	299119558
	693.32	421751048	644802	1064	693.32	304125543
	696818	402513831	648319	1078.5	696818	301750873
	700315	394416235	651835	1059	700315	298366208
	703809	367085875	655349	1060.5	703809	306160471
	707303	342426624	658862	1044.5	707303	305235467
	710796	320916342	662374	1069.5	710796	307750691
	714288	30404514	665884	1066	714288	303186214
	717778	281820881	669393	1066	717778	29744154
	721267	25222192	672901	1082.5	721267	30765731
	724755	248435361	676407	1106.5	724755	300143593
	728241	235554069	679912	1080.5	728241	3020399
	731724	230189917	683415	1084	731724	304725751
	735207	229803712	686917	1077	735207	300732884
	738689	217816315	690418	1103	738689	30981081
	742.17	210879821	693918	1050	742.17	299829592
	745.65	209957323	697414	1057.5	745.65	305619297
	749126	20038324	700911	1040.5	749126	312638361
	752603	192215791	704406	1017	752603	31087957
	756078	194808392	707.9	962	756078	31424136
	759552	191061354	711393	921.5	759552	308774336
	763025	189708763	714884	879	763025	314898559
	766495	191127271	718374	819	766495	31822303
	769965	182122613	721861	786	769965	306259408
	773434	183806653	725348	751	773434	31986722
	776901	17544326	728834	725.5	776901	323866002
	780365	18341131	732319	715.5	780365	323345299
	783.83	179588716	735.8	687.5	783.83	319647259
	787293	186406928	739282	698	787293	320830377
	790754	185381027	742763	693	790754	313174715
	794214	179505292	746242	683	794214	323390849
	797674	184019995	749.72	681.5	797674	329959347
	801.13	184408408	753195	674	801.13	334848226
	804587	186524599	756.67	672	804587	326160088
	808042	187242042	760144	655	808042	327643465
	811494	186296614	763614	665.5	811494	342017917
	814947	18528616	767086	669	814947	341555506
	818397	178576973	770556	667.5	818397	330284285
	821847	183155693	774022	669	821847	337625803
	825296	177885192	777489	653	825296	336659615
	828741	188816972	780955	661	828741	351084298
	832188	183348217	784418	654	832188	340302857
	835631	191966873	787881	659	835631	336942401
	839074	18873774	791343	669.5	839074	33866494
	842514	19467233	794802	658	842514	349749068
	845955	187768426	798261	647	845955	34578677
	849395	19532072	801719	647	849395	335097125
	852831	193806737	805173	641	852831	352258751
	856268	199112421	808629	641	856268	339624089
	859702	197728121	812081	647.5	859702	344551283
	863136	201822416	815533	652	863136	347261804
	866567	18737884	818982	664.5	866567	351594286
	869999	190817133	822432	679	869999	340380656
	873427	188920492	825881	659	873427	339608621
	876855	19527065	829326	672.5	876855	349010099
	880282	195840486	832772	688	880282	345834666
	883707	195934882	836215	697.5	883707	338961908
	887132	199756217	839658	701.5	887132	345732791
	890554	191243046	843098	701	890554	351275984
	893976	197783908	846539	686	893976	352122905
	897396	196287523	849977	712.5	897396	346592687
	900814	206498938	853415	717	900814	346145379
	904232	204733519	856849	719	904232	351621924
	907648	198062991	860283	712.5	907648	353351466
	911064	203297713	863717	731	911064	347034943
	914476	204007101	867148	734	914476	346080616
	917888	204410825	870579	731.5	917888	342640309
	921.3	210831922	874008	740	921.3	346644058
	924709	200340973	877436	736.5	924709	354350583
	928116	215060174	880862	744.5	928116	35147037
	931523	212843869	884286	751	931523	351114334
	934929	221279944	887711	724	934929	353492075
	938333	211172288	891133	750	938333	353523202
	941735	220252943	894553	755	941735	348917758
	945138	217080387	897974	750.5	945138	348677069
	948538	225543069	901392	752.5	948538	353989459
	951937	22188632	904808	758	951937	349095824
	955334	219637031	908226	724	955334	348185779
	958732	224014669	911639	731	958732	34334063
	962126	224007553	915052	754.5	962126	337188303
	965519	22686215	918465	753	965519	330050106
	968911	236583491	921875	739.5	968911	346716073
	972302	234772609	925284	746	972302	331726241
	975694	232482814	928691	750.5	975694	335591472
	979082	243096448	932099	731	979082	340149731
	982469	238455957	935504	756	982469	3229823
	985854	236417238	938907	747	985854	325108802
	989238	23822546	942309	767	989238	332949686
	992621	245887652	945712	758.5	992621	323484984
	996005	252894109	949111	766	996005	321355538
	999385	256757198	952.51	761	999385	30753936
	1002.76	256733823	955907	793	1002.76	317816095
	1006.14	257253326	959302	779.5	1006.14	31176979
	1009.52	268436074	962697	798	1009.52	306678461
	1012.89	257697805	966092	800	1012.89	302548167
	1016.27	264118126	969483	808	1016.27	305036887
	1019.64	264648497	972874	821.5	1019.64	296426726
	1023.01	262324229	976263	821	1023.01	29726168
	1026.38	262085346	979651	833.5	1026.38	290031776
	1029.75	262798873	983038	822	1029.75	27584704
	1033.12	260275832	986423	861	1033.12	279097498
	1036.49	266203247	989807	870	1036.49	280123178
	1039.85	261697917	993192	855.5	1039.85	274460251
	1043.21	257271103	996573	875	1043.21	269052625
	1046.58	256846039	999953	874.5	1046.58	260334152
	1049.94	253253319	1003.33	905.5	1049.94	26037719
	1053.3	260878182	1006.71	919	1053.3	247625606
	1056.66	259467649	1010.09	912	1056.66	246279423
	1060.01	255034561	1013.46	944	1060.01	241964896
	1063.37	245837309	1016.84	970	1063.37	245689605
	1066.72	258686557	1020.21	977.5	1066.72	233657045
	1070.08	256747667	1023.58	980	1070.08	233034743
	1073.43	253778332	1026.95	993.5	1073.43	231778247
	1076.78	255336739	1030.32	992.5	1076.78	224972324
	1080.13	248836908	1033.68	1021	1080.13	2164.87
	1083.48	250407858	1037.05	1021	1083.48	198400296
	1086.83	260911608	1040.42	1019.5	1086.83	211876237
	1090.17	251863057	1043.78	1048	1090.17	209858193
	1093.52	252027472	1047.14	1014	1093.52	204069503
	1096.86	260014635	1050.5	1044.5	1096.86	1904619
	1100.2	257774685	1053.86	1021.5	1100.2	200369057
	1103.54	256327642	1057.22	1057.5	1103.54	189170996
	1106.88	263220521	1060.58	1072.5	1106.88	191511741
	1110.22	258804342	1063.93	1077.5	1110.22	184427312
	1113.56	250972121	1067.29	1081	1113.56	177651731
	1116.89	249995805	1070.64	1092	1116.89	163035468
	1120.22	246859492	1073.99	1111	1120.22	171510122
	1123.56	237420261	1077.34	1119.5	1123.56	165491239
	1126.89	231883002	1080.69	1136	1126.89	160309775
	1130.22	233834796	1084.04	1163.5	1130.22	160362289
	1133.55	230190661	1087.39	1163	1133.55	150658803
	1136.88	227817612	1090.73	1189	1136.88	148578337
	1140.2	226710634	1094.07	1183	1140.2	147467443
	1143.53	21446581	1097.42	1189.5	1143.53	13325509
	1146.85	216388099	1100.76	1203.5	1146.85	133491372
	1150.18	21326356	1104.1	1204	1150.18	131421211
	1153.5	209542177	1107.44	1183	1153.5	125952749
	1156.82	207306982	1110.78	1216	1156.82	134217451
	1160.14	21002899	1114.11	1214.5	1160.14	120845334
	1163.46	209206217	1117.45	1227.5	1163.46	11828442
	1166.77	204958689	1120.78	1189	1166.77	117983351
	1170.09	199484399	1124.11	1206	1170.09	115740908
	1173.4	203749393	1127.45	1197	1173.4	111772371
	1176.71	200806672	1130.78	1201	1176.71	105761134
	1180.02	197485248	1134.1	1209.5	1180.02	94249215
	1183.33	209360137	1137.43	1210	1183.33	101430632
	1186.64	20370235	1140.76	1165.5	1186.64	96234404
	1189.95	200429901	1144.08	1160	1189.95	93872548
	1193.26	200525803	1147.41	1151	1193.26	86740084
	1196.56	199641128	1150.73	1139	1196.56	86397752
	1199.87	200841775	1154.05	1108	1199.87	92440132
	1203.17	204930881	1157.37	1108	1203.17	79512703
	1206.47	198524398	1160.69	1083	1206.47	81895756
	1209.77	200008338	1164.01	1096	1209.77	83757309
	1213.07	194565714	1167.32	1077.5	1213.07	81897378
	1216.37	199498538	1170.64	1075.5	1216.37	73605982
	1219.66	187621914	1173.95	1066.5	1219.66	76750935
	1222.96	186237674	1177.26	1074.5	1222.96	76111667
	1226.25	196263018	1180.58	1088.5	1226.25	82066803
	1229.54	180428865	1183.88	1108.5	1229.54	68844561
	1232.83	192258228	1187.19	1110	1232.83	69544955
	1236.12	174730117	1190.5	1142	1236.12	75384004
	1239.41	177329543	1193.81	1146.5	1239.41	67898723
	1242.7	180766517	1197.11	1175	1242.7	66191127
	1245.99	18109205	1200.41	1177	1245.99	63578233
	1249.27	186190285	1203.72	1157	1249.27	62366947
	1252.55	185046109	1207.02	1166	1252.55	66155414
	1255.84	183214392	1210.32	1152	1255.84	6379774
	1259.12	181804421	1213.61	1137.5	1259.12	63046749
	1262.4	18286307	1216.91	1122	1262.4	62230558
	1265.68	18203935	1220.21	1127	1265.68	66629181
	1268.95	184542427	1223.5	1103	1268.95	61764582
	1272.23	187927001	1226.8	1082	1272.23	60736889
	1275.51	172650235	1230.09	1058	1275.51	52752054
	1278.78	184099309	1233.38	1035	1278.78	56287071
	1282.05	17913407	1236.67	1012	1282.05	54345996
	1285.32	172703528	1239.96	1015	1285.32	49402842
	1288.59	174974692	1243.24	993.5	1288.59	55016625
	1291.86	176430572	1246.53	985	1291.86	55977359
	1295.13	168086176	1249.82	1005.5	1295.13	52166058
	1298.4	178887514	1253.1	1004.5	1298.4	51295735
	1301.66	173281793	1256.38	1014	1301.66	50519448
	1304.93	16528963	1259.66	993	1304.93	51040135
	1308.19	167856432	1262.94	1006.5	1308.19	57044903
	1311.45	174774012	1266.22	1000.5	1311.45	45157724
	1314.71	159992377	1269.5	1003.5	1314.71	51166611
	1317.97	166113536	1272.77	1018.5	1317.97	51012577
	1321.23	162135498	1276.05	993.5	1321.23	52913637
	1324.48	157129494	1279.32	981	1324.48	48067908
	1327.74	157927089	1282.59	977	1327.74	51308203
	1330.99	152174743	1285.86	981.5	1330.99	52298752
	1334.25	157257005	1289.13	985	1334.25	57857334
	1337.5	154879348	1292.4	971	1337.5	53457214
	1340.75	15526555	1295.67	937	1340.75	49021284
	1344	147064619	1298.94	933.5	1344	54061555
	1347.24	15307081	1302.2	915	1347.24	51825206
	1350.49	146729638	1305.46	913.5	1350.49	48671926
	1353.73	14473661	1308.73	913	1353.73	51675069
	1356.98	138607229	1311.99	905.5	1356.98	44616289
	1360.22	140397013	1315.25	886	1360.22	52372972
	1363.46	140007716	1318.51	867.5	1363.46	49712949
	1366.7	137736345	1321.76	879.5	1366.7	4339323
	1369.94	127763908	1325.02	849.5	1369.94	50908829
	1373.18	132010411	1328.27	856.5	1373.18	56710756
	1376.42	129472861	1331.53	851	1376.42	49308024
	1379.65	126587547	1334.78	839	1379.65	51046894
	1382.89	127464917	1338.03	849	1382.89	52871888
	1386.12	123035543	1341.28	839.5	1386.12	54025522
	1389.35	11820515	1344.53	858.5	1389.35	50462561
	1392.58	121421745	1347.78	852	1392.58	50939014
	1395.81	114924336	1351.02	825	1395.81	52408894
	1399.04	106358928	1354.27	835	1399.04	53241211
	1402.27	115494528	1357.51	835	1402.27	44022977
	1405.49	10389945	1360.76	839	1405.49	46289516
	1408.72	98898089	1364	834.5	1408.72	41936221
	1411.94	103908067	1367.24	821.5	1411.94	47409737
	1415.17	97056771	1370.48	832.5	1415.17	49837425
	1418.39	101072832	1373.71	797	1418.39	53725961
	1421.6	95232266	1376.95	812	1421.6	45556378
	1424.82	99837441	1380.18	815	1424.82	40918992
	1428.04	9439068	1383.42	791	1428.04	47417158
	1431.26	93165989	1386.65	763	1431.26	48091885
	1434.47	92382707	1389.88	748.5	1434.47	46392566
	1437.69	89701178	1393.11	754.5	1437.69	44581456
	1440.9	94385075	1396.34	740.5	1440.9	45149336
	1444.11	92744071	1399.57	734	1444.11	44601834
	1447.32	85358172	1402.8	720	1447.32	5296896
	1450.53	90311384	1406.02	704	1450.53	47975725
	1453.74	92562712	1409.25	686	1453.74	43304139
	1456.94	89483515	1412.47	681	1456.94	38095644
	1460.15	93175095	1415.69	679	1460.15	47362392
	1463.35	91388166	1418.91	660	1463.35	39540265
	1466.55	9350938	1422.13	650	1466.55	45496841
	1469.76	87920381	1425.35	634.5	1469.76	37614668
	1472.96	88234896	1428.57	650	1472.96	3914467
	1476.16	8932557	1431.78	640	1476.16	43395405
	1479.35	9307678	1435	624.5	1479.35	49344363
	1482.55	80797792	1438.21	632	1482.55	52407595
	1485.75	86036978	1441.42	641	1485.75	41806587
	1488.94	82623723	1444.64	627	1488.94	37373852
	1492.14	87308277	1447.84	625.5	1492.14	40737398
	1495.33	95044405	1451.05	622.5	1495.33	4311625
	1498.52	90659733	1454.26	620.5	1498.52	36871912
	1501.71	84944265	1457.47	618	1501.71	40816394
	1504.9	83444007	1460.67	623.5	1504.9	42427704
	1508.08	83099357	1463.88	610	1508.08	42688396
	1511.27	93829535	1467.08	617	1511.27	40175397
	1514.45	86923335	1470.28	599	1514.45	46462811
	1517.64	87352968	1473.48	619.5	1517.64	38511538
	1520.82	99354237	1476.68	592.5	1520.82	42174709
	1524	96184749	1479.88	617.5	1524	44424775
	1527.18	98347507	1483.07	595.5	1527.18	43560744
	1530.36	96841517	1486.27	618	1530.36	47223625
	1533.54	92783783	1489.46	604	1533.54	43751426
	1536.71	95702724	1492.65	576	1536.71	38475761
	1539.89	92552518	1495.85	608	1539.89	42644434
	1543.06	968.7	1499.04	619.5	1543.06	44628671
	1546.24	88328338	1502.23	602.5	1546.24	43972251
	1549.41	99910377	1505.41	599	1549.41	46751422
	1552.58	91446703	1508.6	601	1552.58	44850577
	1555.75	9574232	1511.79	614	1555.75	44465723
	1558.92	99905231	1514.97	597	1558.92	41900868
	1562.08	98127873	1518.15	609	1562.08	36610676
	1565.25	98463388	1521.34	606.5	1565.25	4295885
	1568.42	9878921	1524.52	612	1568.42	40352046
	1571.58	97686781	1527.7	617.5	1571.58	40399948
	1574.74	97304672	1530.88	627	1574.74	42278901
	1577.9	94332886	1534.06	619.5	1577.9	43552913
	1581.06	94877427	1537.23	616.5	1581.06	48243991
	1584.22	100577298	1540.4	636	1584.22	42855144
	1587.38	101960505	1543.58	632.5	1587.38	42826378
	1590.54	95028049	1546.75	622.5	1590.54	40411702
	1593.69	9566239	1549.92	629	1593.69	44877839
	1596.84	10372008	1553.09	623	1596.84	43120093
	1600	94368667	1556.26	660	1600	42275742
	1603.15	99153066	1559.43	668	1603.15	43493244
	1606.3	104730827	1562.6	637	1606.3	45395885
	1609.45	102642952	1565.76	626	1609.45	47156672
	1612.6	101790445	1568.93	631	1612.6	46653612
	1615.74	101117778	1572.09	651.5	1615.74	4321947
	1618.89	9897802	1575.25	630.5	1618.89	38493742
	1622.03	102537112	1578.41	659	1622.03	42029959
	1625.18	94246117	1581.57	648	1625.18	40842593
	1628.32	110431983	1584.73	638.5	1628.32	38242197
	1631.46	97837241	1587.89	639.5	1631.46	45120007
	1634.6	93933896	1591.05	637.5	1634.6	44687032
	1637.74	9858095	1594.2	633.5	1637.74	42038277
	1640.88	104267407	1597.35	638	1640.88	39143749
	1644.02	10339027	1600.51	639.5	1644.02	46830456
	1647.15	9997403	1603.66	642.5	1647.15	46537219
	1650.29	101108716	1606.81	625	1650.29	3447142
	1653.42	9967531	1609.96	618	1653.42	50910701
	1656.55	97152325	1613.11	626	1656.55	51221255
	1659.68	104363767	1616.25	634	1659.68	42820088
	1662.81	101679637	1619.4	630	1662.81	41008205
	1665.94	104702939	1622.54	633	1665.94	48998615
	1669.06	108182177	1625.68	636.5	1669.06	37470176
	1672.19	105687353	1628.83	652.5	1672.19	43621193
	1675.32	104823971	1631.97	629.5	1675.32	38700522
	1678.44	108898538	1635.11	612	1678.44	46411037
	1681.56	102963556	1638.25	635	1681.56	42358887
	1684.68	100513027	1641.38	651	1684.68	51869078
	1687.8	104440954	1644.52	639.5	1687.8	36019615
	1690.92	98437341	1647.66	645.5	1690.92	37632506
	1694.04	107899189	1650.79	654	1694.04	36167755
	1697.16	105685503	1653.92	657	1697.16	4540737
	1700.27	100785802	1657.05	640	1700.27	38636263
	1703.39	109479055	1660.18	648.5	1703.39	34505632
	1706.5	105568303	1663.31	658	1706.5	33246301
	1709.61	11282403	1666.44	635.5	1709.61	4228137
	1712.73	108997714	1669.57	658	1712.73	42426918
	1715.84	114509407	1672.69	656.5	1715.84	33412799
	1718.94	109378114	1675.82	639.5	1718.94	37497034
	1722.05	108303786	1678.94	660.5	1722.05	34979761
	1725.16	10518195	1682.06	659.5	1725.16	35072917
	1728.26	105270142	1685.19	662	1728.26	3666446
	1731.37	108007302	1688.31	671	1731.37	39577496
	1734.47	103853497	1691.42	659	1734.47	42497941
	1737.57	103186199	1694.54	657	1737.57	45669848
	1740.67	10892641	1697.66	651	1740.67	47971222
	1743.77	112434133	1700.77	682	1743.77	35247069
	1746.87	112755369	1703.89	665	1746.87	37623395
	1749.97	105082122	1707	690	1749.97	35003204
	1753.06	108207939	1710.11	668	1753.06	42234495
	1756.16	105972733	1713.22	677	1756.16	35767295
	1759.25	115079599	1716.33	675.5	1759.25	38782596
	1762.34	113028995	1719.44	691.5	1762.34	46997413
	1765.44	10776837	1722.55	669.5	1765.44	41342739
	1768.53	10874383	1725.65	670.5	1768.53	34843598
	1771.62	110043826	1728.76	679	1771.62	37156989
	1774.7	107273915	1731.86	670	1774.7	50179941
	1777.79	110695992	1734.97	701	1777.79	42624415
	1780.88	113496612	1738.07	682	1780.88	44214437
	1783.96	109485337	1741.17	682	1783.96	44098049
	1787.05	114839052	1744.27	678.5	1787.05	42768185
	1790.13	109675879	1747.37	681	1790.13	45202932
	1793.21	112484261	1750.46	687.5	1793.21	48281256
	1796.29	110342201	1753.56	700.5	1796.29	48539162
	1799.37	110972701	1756.65	693	1799.37	58610655
	1802.45	112870761	1759.75	702.5	1802.45	5439274
	1805.52	117539956	1762.84	690	1805.52	62943494
	1808.6	115748148	1765.93	701.5	1808.6	68731782
	1811.67	113964481	1769.02	719	1811.67	65170758
	1814.75	121399813	1772.11	693.5	1814.75	6971927
	1817.82	125744292	1775.2	698	1817.82	75247488
	1820.89	118192349	1778.28	691	1820.89	91251337
	1823.96	127013985	1781.37	700	1823.96	8712682
	1827.03	128369202	1784.45	687	1827.03	104834944
	1830.1	137021002	1787.54	712	1830.1	111899712
	1833.16	12923497	1790.62	696	1833.16	124957241
	1836.23	136335945	1793.7	686	1836.23	128210318
	1839.29	143331093	1796.78	683	1839.29	142327173
	1842.35	151527835	1799.86	689.5	1842.35	1510927
	1845.42	151066586	1802.94	692	1845.42	151489776
	1848.48	15340252	1806.01	688.5	1848.48	162705657
	1851.54	148636054	1809.09	693	1851.54	164891224
	1854.6	15443119	1812.16	696.5	1854.6	167049481
	1857.65	149236522	1815.23	691.5	1857.65	163900579
	1860.71	151369868	1818.31	683.5	1860.71	159319235
	1863.77	150335821	1821.38	685.5	1863.77	147333595
	1866.82	13860498	1824.45	665	1866.82	130342821
	1869.87	139304752	1827.51	676.5	1869.87	121494769
	1872.92	12965614	1830.58	668	1872.92	112380442
	1875.97	122978144	1833.65	677	1875.97	97671845
	1879.03	113937166	1836.71	681	1879.03	91197806
	1882.07	113268012	1839.78	675.5	1882.07	71335857
	1885.12	109205878	1842.84	670	1885.12	73024475
	1888.17	106354369	1845.9	672.5	1888.17	5639084
	1891.21	109569092	1848.96	665	1891.21	48855148
	1894.26	103671837	1852.02	659.5	1894.26	45718023
	1897.3	102744821	1855.08	663	1897.3	41408858
	1900.34	97199439	1858.14	662.5	1900.34	44123465
	1903.38	92715692	1861.19	658.5	1903.38	35189848
	1906.42	93992581	1864.25	676.5	1906.42	3247501
	1909.46	93383109	1867.3	660.5	1909.46	30398957
	1912.5	92460278	1870.36	669.5	1912.5	36652692
	1915.54	90395088	1873.41	655	1915.54	2969922
	1918.57	96004159	1876.46	670	1918.57	27984771
	1921.6	95024877	1879.51	652	1921.6	32199131
	1924.64	92799625	1882.56	665	1924.64	31293068
	1927.67	90337642	1885.6	683.5	1927.67	30868052
	1930.7	93089312	1888.65	667.5	1930.7	26748856
	1933.73	92615635	1891.69	674	1933.73	29386484
	1936.76	91154614	1894.74	674	1936.76	2519694
	1939.79	87379249	1897.78	664.5	1939.79	21210228
	1942.81	8237117	1900.82	659	1942.81	2619561
	1945.84	83152125	1903.86	662	1945.84	27383576
	1948.86	85315371	1906.9	650	1948.86	24856652
	1951.88	85401281	1909.94	672.5	1951.88	25530583
	1954.91	86284228	1912.98	658	1954.91	19408098
	1957.93	87454473	1916.01	657.5	1957.93	26793746
	1960.95	84337387	1919.05	663	1960.95	23548259
	1963.97	85792973	1922.08	669	1963.97	26479642
	1966.98	82049867	1925.11	652	1966.98	20467187
	1970	780458	1928.15	645.5	1970	23100323
	1973.01	92357047	1931.18	653.5	1973.01	25089637
	1976.03	85144334	1934.21	661.5	1976.03	28862541
	1979.04	87273939	1937.23	659	1979.04	32541638
	1982.05	83216227	1940.26	670	1982.05	26838633
	1985.07	83953555	1943.29	654.5	1985.07	24346219
	1988.07	77789852	1946.31	647	1988.07	21225334
	1991.08	80557194	1949.34	665	1991.08	23945046
	1994.09	78483223	1952.36	658	1994.09	19633671
	1997.1	8013394	1955.38	634.5	1997.1	20194213
	2000.1	74276995	1958.4	636	2000.1	18930003
	2003.11	76980096	1961.42	647.5	2003.11	24645392
	2006.11	76264538	1964.44	660	2006.11	20308043
	2009.11	81166677	1967.46	663.5	2009.11	20287631
	2012.11	69632513	1970.47	648	2012.11	2647416
	2015.11	69943048	1973.49	639.5	2015.11	21858633
	2018.11	71533283	1976.5	651	2018.11	15145054
	2021.11	73338219	1979.51	644	2021.11	19771425
	2024.11	69599858	1982.53	634	2024.11	1459975
	2027.1	69239858	1985.54	639.5	2027.1	22425393
	2030.1	62504907	1988.55	648.5	2030.1	14949639
	2033.09	70123321	1991.55	653.5	2033.09	20440217
	2036.08	65517445	1994.56	651	2036.08	11633769
	2039.07	63978279	1997.57	644	2039.07	19725298
	2042.06	64812826	2000.57	645.5	2042.06	15326808
	2045.05	65410086	2003.58	632.5	2045.05	13456302
	2048.04	5626306	2006.58	628.5	2048.04	11345782
	2051.03	63561751	2009.58	636.5	2051.03	20498252
	2054.01	59625823	2012.58	620	2054.01	12796107
	2057	59929949	2015.58	622	2057	12528571
	2059.98	57441462	2018.58	631.5	2059.98	24872432
	2062.96	57561697	2021.58	615.5	2062.96	14898302
	2065.95	63283987	2024.57	605.5	2065.95	1502778
	2068.93	60263669	2027.57	622	2068.93	15845674
	2071.91	58253077	2030.56	629.5	2071.91	13431587
	2074.88	60568883	2033.56	608	2074.88	19407936
	2077.86	60591747	2036.55	616.5	2077.86	14439899
	2080.84	56167341	2039.54	612	2080.84	12201889
	2083.81	54350338	2042.53	614	2083.81	12653334
	2086.79	55286394	2045.52	598	2086.79	14992391
	2089.76	56249859	2048.51	604	2089.76	9079915
	2092.73	61365059	2051.49	602	2092.73	8018486
	2095.7	56285995	2054.48	586	2095.7	7532105
	2098.67	51125669	2057.46	590.5	2098.67	13316776
	2101.64	55895082	2060.45	591.5	2101.64	13464501
	2104.61	51351235	2063.43	585.5	2104.61	8683284
	2107.57	52125809	2066.41	602	2107.57	8707578
	2110.54	46887445	2069.39	586.5	2110.54	5713487
	2113.5	55599507	2072.37	598.5	2113.5	352492
	2116.47	49626631	2075.35	592	2116.47	9341968
	2119.43	52710185	2078.32	583	2119.43	529855
	2122.39	55569486	2081.3	584	2122.39	11668213
	2125.35	50727537	2084.27	587	2125.35	9566959
	2128.31	52933337	2087.25	596.5	2128.31	2373792
	2131.27	49225887	2090.22	595	2131.27	9884714
	2134.22	51246879	2093.19	577.5	2134.22	5483206
	2137.18	46827935	2096.16	581	2137.18	10994317
	2140.13	50188435	2099.13	571	2140.13	498001
	2143.09	44459001	2102.1	576.5	2143.09	11018322
	2146.04	51368015	2105.07	583.5	2146.04	3253226
	2148.99	50408786	2108.03	586.5	2148.99	6786242
	2151.94	51363318	2111	584	2151.94	5061372
	2154.89	51372609	2113.96	581.5	2154.89	4325618
	2157.84	54178662	2116.92	588.5	2157.84	6298984
	2160.79	42477477	2119.89	585.5	2160.79	6846472
	2163.73	52898752	2122.85	591	2163.73	4438593
	2166.68	47798095	2125.81	574.5	2166.68	6783335
	2169.62	51547901	2128.77	591.5	2169.62	6059721
	2172.56	46961475	2131.72	587.5	2172.56	8924246
	2175.51	48245117	2134.68	580.5	2175.51	6244391
	2178.45	47653228	2137.63	594	2178.45	5747196
	2181.39	44580109	2140.59	584.5	2181.39	3783148
	2184.32	48494464	2143.54	591	2184.32	1622776
	2187.26	44927889	2146.49	587	2187.26	1697029
	2190.2	53901086	2149.45	594	2190.2	-1746565
	2193.13	48541763	2152.4	583.5	2193.13	8866535
	2196.07	5143351	2155.34	573.5	2196.07	3818258
	2199	46471739	2158.29	586	2199	7060685
	2201.93	45690745	2161.24	573.5	2201.93	2492281
	2204.87	51067823	2164.19	588.5	2204.87	50235
	2207.8	43775388	2167.13	565	2207.8	870438
	2210.72	46954442	2170.07	579	2210.72	1802106
	2213.65	41792569	2173.02	572	2213.65	1357401
	2216.58	46184478	2175.96	576.5	2216.58	5259877
	2219.51	5234917	2178.9	581	2219.51	6079537
	2222.43	44807358	2181.84	573	2222.43	3986947
	2225.35	46148333	2184.77	585	2225.35	3416551
	2228.28	5128738	2187.71	588	2228.28	389978
	2231.2	45863928	2190.65	575.5	2231.2	752775
	2234.12	49659265	2193.58	596	2234.12	316097
	2237.04	41903391	2196.52	590.5	2237.04	2162368
	2239.96	47718308	2199.45	581.5	2239.96	-2607029
	2242.88	51430015	2202.38	582	2242.88	-0.92218
	2245.79	47973232	2205.32	594	2245.79	7389389
	2248.71	50857524	2208.24	587	2248.71	7000624
	2251.62	46347329	2211.17	588	2251.62	6629665
	2254.53	46235929	2214.1	599.5	2254.53	5712927
	2257.45	41377605	2217.03	596	2257.45	9814816
	2260.36	48467798	2219.95	591	2260.36	1744527
	2263.27	49408789	2222.88	595.5	2263.27	3442465
	2266.18	44281578	2225.8	590.5	2266.18	7986634
	2269.09	49222166	2228.72	585	2269.09	5256036
	2271.99	42945279	2231.65	592	2271.99	-189717
	2274.9	44467469	2234.57	592.5	2274.9	4524159
	2277.8	46965186	2237.49	585	2277.8	1151891
	2280.71	4669098	2240.4	604	2280.71	0.6025
	2283.61	44828304	2243.32	604	2283.61	6587474
	2286.51	45142434	2246.24	606.5	2286.51	7544949
	2289.41	47408369	2249.15	590.5	2289.41	1720676
	2292.31	3770711	2252.07	593	2292.31	-4564341
	2295.21	42388659	2254.98	598.5	2295.21	6311898
	2298.11	43036016	2257.89	604	2298.11	3930397
	2301.01	43777181	2260.8	602	2301.01	1561157
	2303.9	39687887	2263.71	594.5	2303.9	722819
	2306.8	41987672	2266.62	599	2306.8	210811
	2309.69	41203001	2269.53	599	2309.69	1709313
	2312.58	45055142	2272.44	600	2312.58	-157821
	2315.48	41284363	2275.34	611	2315.48	-632106
	2318.37	40527131	2278.25	589.5	2318.37	1204923
	2321.26	40973714	2281.15	613.5	2321.26	1059233
	2324.14	41555848	2284.05	617	2324.14	-425519
	2327.03	43893063	2286.96	607	2327.03	-351764
	2329.92	38721094	2289.85	620	2329.92	544526
	2332.8	43190681	2292.76	609	2332.8	4662644
	2335.69	42050349	2295.65	595.5	2335.69	-26661
	2338.57	43096574	2298.55	607.5	2338.57	-4146902
	2341.45	3608162	2301.45	606	2341.45	958104
	2344.33	39979488	2304.34	609	2344.33	1664412
	2347.21	40628177	2307.24	603.5	2347.21	2154023
	2350.09	42513688	2310.13	616	2350.09	-5095062
	2352.97	38716023	2313.02	612.5	2352.97	139116
	2355.85	44515182	2315.91	601.5	2355.85	5727691
	2358.73	35815164	2318.8	647.5	2358.73	2891532
	2361.6	45682716	2321.69	600	2361.6	2695373
	2364.47	40147095	2324.58	625	2364.47	349534
	2367.35	36008556	2327.47	620.5	2367.35	5463322
	2370.22	3623059	2330.35	692.5	2370.22	3919124
	2373.09	40508452	2333.24	688.5	2373.09	216725
	2375.96	42392143	2336.12	607.5	2375.96	-831297
	2378.83	42760665	2339.01	595	2378.83	-429517
	2381.7	38475017	2341.89	588	2381.7	-194406
	2384.56	42513948	2344.77	592.5	2384.56	-449257
	2387.43	38959964	2347.65	602.5	2387.43	3297521
	2390.29	40955561	2350.53	605.5	2390.29	290347
	2393.16	37111242	2353.41	602	2393.16	-265201
	2396.02	37935507	2356.28	588	2396.02	-297693
	2398.88	32656607	2359.16	604.5	2398.88	472161
	2401.74	37412543	2362.03	594	2401.74	1992361
	2404.6	39301316	2364.91	599	2404.6	-108009
	2407.46	39515925	2367.78	616	2407.46	6274809
	2410.32	42053371	2370.65	610	2410.32	566061
	2413.18	35193656	2373.52	611.5	2413.18	1056666
	2416.03	35097534	2376.39	601	2416.03	207736
	2418.89	36872497	2379.26	601.5	2418.89	-84632
	2421.74	35610055	2382.13	600	2421.74	-1642903
	2424.59	32626455	2385	599	2424.59	1229878
	2427.44	31149697	2387.86	612.5	2427.44	509027
	2430.29	28915781	2390.72	604.5	2430.29	985544
	2433.14	32608708	2393.59	624.5	2433.14	-5395569
	2435.99	31603478	2396.45	602	2435.99	-785431
	2438.84	33645092	2399.31	606.5	2438.84	-1851678
	2441.69	29532551	2402.17	613.5	2441.69	-58367
	2444.53	31035616	2405.03	625	2444.53	-2575531
	2447.38	32337766	2407.89	629	2447.38	-3272766
	2450.22	32972523	2410.75	623	2450.22	-5502862
	2453.06	30513129	2413.6	625	2453.06	-4537572
	2455.91	2984982	2416.46	616.5	2455.91	-5468658
	2458.75	28157121	2419.31	610.5	2458.75	-6015593
	2461.58	33604036	2422.17	615.5	2461.58	1440629
	2464.42	36733037	2425.02	617	2464.42	-4268521
	2467.26	32491889	2427.87	618	2467.26	-2639278
	2470.1	30860591	2430.72	618	2470.1	-1543638
	2472.93	3183991	2433.57	613	2472.93	-194826
	2475.77	32127316	2436.42	622.5	2475.77	4157611
	2478.6	23779341	2439.27	623.5	2478.6	3248228
	2481.43	32194219	2442.11	622.5	2481.43	1215251
	2484.27	28621184	2444.96	609	2484.27	-243102
	2487.1	28742771	2447.8	618	2487.1	1056736
	2489.93	26097213	2450.65	612	2489.93	-2829016
	2492.75	2559428	2453.49	615.5	2492.75	4085434
	2495.58	35070435	2456.33	624	2495.58	391651
	2498.41	28808446	2459.17	605	2498.41	-6368999
	2501.23	25804085	2462.01	604	2501.23	-4704295
	2504.06	28102811	2464.85	604	2504.06	-2628967
	2506.88	29388168	2467.68	594	2506.88	3691581
	2509.7	25800383	2470.52	593	2509.7	-511446
	2512.52	35261459	2473.36	601	2512.52	-1068047
	2515.34	29570395	2476.19	613.5	2515.34	187778
	2518.16	25944192	2479.02	618.5	2518.16	-5668963
	2520.98	24889851	2481.85	606	2520.98	-1651275
	2523.8	29805371	2484.69	603	2523.8	195846
	2526.62	31963753	2487.52	593	2526.62	72624
	2529.43	29816774	2490.35	608	2529.43	1449206
	2532.25	24387883	2493.17	589.5	2532.25	1076634
	2535.06	27854632	2496	608	2535.06	-4286679
	2537.87	28215246	2498.83	588	2537.87	5302451
	2540.68	28744725	2501.65	590.5	2540.68	-391974
	2543.49	2502407	2504.48	608	2543.49	1050048
	2546.3	26118282	2507.3	597.5	2546.3	-1659483
	2549.11	2504836	2510.12	600	2549.11	-174565
	2551.92	23155305	2512.94	600.5	2551.92	1837803
	2554.73	23337118	2515.76	600.5	2554.73	1374624
	2557.53	2378058	2518.58	618	2557.53	-1482266
	2560.34	28740129	2521.4	606.5	2560.34	2450464
	2563.14	21198329	2524.22	600.5	2563.14	-141551
	2565.94	296524	2527.03	606.5	2565.94	3518977
	2568.74	19984341	2529.85	612.5	2568.74	-729073
	2571.54	23258152	2532.66	617	2571.54	-749659
	2574.34	23947836	2535.48	599	2574.34	-636781
	2577.14	22093391	2538.29	600.5	2577.14	1466564
	2579.94	21234818	2541.1	601.5	2579.94	-4466623
	2582.74	23506118	2543.91	619.5	2582.74	-1970341
	2585.53	22504076	2546.72	607.5	2585.53	2725267
	2588.33	22458123	2549.53	608.5	2588.33	4132493
	2591.12	17516829	2552.33	613.5	2591.12	2255051
	2593.91	21678411	2555.14	607	2593.91	-1858913
	2596.71	22100082	2557.95	602.5	2596.71	491974
	2599.5	23022414	2560.75	592	2599.5	-3783266
	2602.29	19243623	2563.55	617.5	2602.29	-43979
	2605.08	20229709	2566.36	601	2605.08	-3132831
	2607.86	21414461	2569.16	600.5	2607.86	1216483
	2610.65	23197301	2571.96	606.5	2610.65	-1273586
	2613.44	1760802	2574.76	593	2613.44	251833
	2616.22	18855406	2577.56	594	2616.22	2011615
	2619	24841673	2580.35	584	2619	238489
	2621.79	19038028	2583.15	610	2621.79	405278
	2624.57	16748053	2585.94	591	2624.57	3781043
	2627.35	1605996	2588.74	584	2627.35	-3714197
	2630.13	13626747	2591.53	602	2630.13	7317061
	2632.91	19353416	2594.32	591.5	2632.91	-0.69181
	2635.69	14126966	2597.12	585	2635.69	2583076
	2638.46	16454192	2599.91	590.5	2638.46	-3582274
	2641.24	16810507	2602.7	583.5	2641.24	276299
	2644.02	19397704	2605.48	593.5	2644.02	1301758
	2646.79	1874258	2608.27	576	2646.79	2210927
	2649.56	2028134	2611.06	601.5	2649.56	3896605
	2652.33	21238985	2613.84	572.5	2652.33	-429205
	2655.11	18353718	2616.63	586.5	2655.11	-178404
	2657.88	20792133	2619.41	566.5	2657.88	434681
	2660.65	14263433	2622.2	575	2660.65	2044539
	2663.41	19959417	2624.98	590.5	2663.41	-1346311
	2666.18	1576949	2627.76	578.5	2666.18	6057452
	2668.95	1963845	2630.54	577	2668.95	-311267
	2671.71	15593095	2633.32	572.5	2671.71	1605445
	2674.48	1199283	2636.09	591	2674.48	1963767
	2677.24	14730252	2638.87	607	2677.24	-1396474
	2680	17658563	2641.65	588.5	2680	2247811
	2682.77	12880962	2644.42	583	2682.77	4176705
	2685.53	12680052	2647.19	577.5	2685.53	358044
	2688.29	13734031	2649.97	603	2688.29	2030912
	2691.05	130299	2652.74	587	2691.05	-4123689
	2693.8	13269462	2655.51	584.5	2693.8	1839166
	2696.56	13294113	2658.28	585	2696.56	4148631
	2699.31	13476458	2661.05	593	2699.31	2151559
	2702.07	16730892	2663.82	593.5	2702.07	1980094
	2704.82	10006021	2666.59	586	2704.82	2208098
	2707.58	1291924	2669.35	577	2707.58	1835708
	2710.33	10863155	2672.12	585	2710.33	960792
	2713.08	9887964	2674.88	581.5	2713.08	879419
	2715.83	10237667	2677.64	582.5	2715.83	-216411
	2718.58	15853264	2680.41	592	2718.58	1829304
	2721.33	10917755	2683.17	568	2721.33	-1188435
	2724.07	15691948	2685.93	594.5	2724.07	-3735684
	2726.82	1127923	2688.69	567.5	2726.82	2986674
	2729.56	3406214	2691.45	589	2729.56	2444527
	2732.31	7923287	2694.2	586	2732.31	-1557015
	2735.05	9355064	2696.96	588	2735.05	-128055
	2737.8	10228931	2699.71	581	2737.8	2588508
	2740.54	10466502	2702.47	599.5	2740.54	779578
	2743.28	9797971	2705.22	578	2743.28	-2075795
	2746.02	13839338	2707.98	583	2746.02	404539
	2748.75	7410413	2710.73	579.5	2748.75	724093
	2751.49	5009577	2713.48	590.5	2751.49	4294401
	2754.23	768064	2716.23	570	2754.23	3536269
	2756.96	6485413	2718.98	586.5	2756.96	1187664
	2759.7	11337276	2721.72	580	2759.7	371166
	2762.43	10044849	2724.47	570	2762.43	2802187
	2765.17	12172512	2727.22	575.5	2765.17	3337315
	2767.9	11945887	2729.96	561.5	2767.9	4160979
	2770.63	12622163	2732.71	568.5	2770.63	-2013786
	2773.36	9950341	2735.45	581	2773.36	99402
	2776.09	7196421	2738.19	584.5	2776.09	261399
	2778.81	4279216	2740.93	582	2778.81	11768327
	2781.54	8399101	2743.67	563.5	2781.54	4910855
	2784.27	6443889	2746.41	576.5	2784.27	372959
	2786.99	4374394	2749.15	576.5	2786.99	88862
	2789.72	10501989	2751.89	566.5	2789.72	87788
	2792.44	7121302	2754.62	562	2792.44	5022701
	2795.16	818352	2757.36	560	2795.16	3301105
	2797.88	2483643	2760.09	562.5	2797.88	3731093
	2800.6	2899671	2762.83	569	2800.6	1439664
	2803.32	6496604	2765.56	576.5	2803.32	1824821
	2806.04	5564443	2768.29	557	2806.04	3093564
	2808.76	13512188	2771.02	586	2808.76	2271895
	2811.48	5926839	2773.75	563	2811.48	1420813
	2814.19	3832214	2776.48	565.5	2814.19	4537316
	2816.91	8279679	2779.21	572.5	2816.91	299415
	2819.62	3585869	2781.93	572.5	2819.62	3835103
	2822.33	3815968	2784.66	571	2822.33	1786386
	2825.05	6695155	2787.38	575	2825.05	3247263
	2827.76	225069	2790.11	556	2827.76	-1699263
	2830.47	2485892	2792.83	554.5	2830.47	4523808
	2833.18	3144625	2795.55	553	2833.18	4691478
	2835.89	5813266	2798.27	583.5	2835.89	3570746
	2838.59	5522638	2800.99	570.5	2838.59	-714376
	2841.3	4902099	2803.71	572.5	2841.3	1490096
	2844	4316291	2806.43	581.5	2844	4367181
	2846.71	3410573	2809.15	566.5	2846.71	-1751141
	2849.41	9590587	2811.86	569	2849.41	-292845
	2852.11	3619513	2814.58	567	2852.11	-607942
	2854.82	7755527	2817.3	570	2854.82	1949553
	2857.52	9439276	2820.01	578	2857.52	-1235328
	2860.22	4605937	2822.72	560	2860.22	4404402
	2862.91	3729334	2825.43	565	2862.91	3046765
	2865.61	965782	2828.14	570	2865.61	5854719
	2868.31	3083219	2830.85	562.5	2868.31	5667286
	2871.01	5076531	2833.56	572	2871.01	4679466
	2873.7	6764582	2836.27	572.5	2873.7	7026288
	2876.4	5599721	2838.98	571.5	2876.4	4735699
	2879.09	66506	2841.68	564.5	2879.09	5522757
	2881.78	7791394	2844.39	553	2881.78	564434
	2884.47	4671102	2847.09	566.5	2884.47	5248732
	2887.16	1397726	2849.8	563.5	2887.16	1592651
	2889.85	5241265	2852.5	562	2889.85	3209193
	2892.54	267672	2855.2	569	2892.54	3802357
	2895.23	257209	2857.9	559.5	2895.23	2372146
	2897.92	5238377	2860.6	549.5	2897.92	-2530441
	2900.6	2451408	2863.3	570	2900.6	5664639
	2903.29	1925527	2865.99	564	2903.29	-1512695
	2905.97	2316392	2868.69	568.5	2905.97	2357643
	2908.65	5014175	2871.39	569.5	2908.65	-2639389
	2911.34	3883046	2874.08	560	2911.34	4389164
	2914.02	4001665	2876.78	565.5	2914.02	717395
	2916.7	2241201	2879.47	575	2916.7	1099258
	2919.37	5396487	2882.16	557	2919.37	675807
	2922.05	5338861	2884.85	562	2922.05	2399941
	2924.73	4299153	2887.54	570.5	2924.73	306871
	2927.41	1705365	2890.23	575	2927.41	-1620885
	2930.08	3357328	2892.92	557	2930.08	117214
	2932.76	317238	2895.61	561.5	2932.76	2546896
	2935.43	3937183	2898.29	571	2935.43	426275
	2938.11	869074	2900.98	562	2938.11	-2087764
	2940.78	2091718	2903.66	566.5	2940.78	-529102
	2943.45	-335717	2906.35	571	2943.45	-1354796
	2946.12	-19023	2909.03	547	2946.12	4693155
	2948.79	1758178	2911.71	565.5	2948.79	-118925
	2951.45	759341	2914.39	562	2951.45	1531059
	2954.12	-1021407	2917.07	564	2954.12	-551052
	2956.79	-1303234	2919.75	564.5	2956.79	2736485
	2959.45	-2570303	2922.43	572.5	2959.45	-891259
	2962.12	1479715	2925.11	556	2962.12	3898576
	2964.78	-508508	2927.78	571.5	2964.78	252134
	2967.45	118356	2930.46	561	2967.45	-233073
	2970.11	-469302	2933.13	554	2970.11	-1013867
	2972.77	-2528473	2935.81	565.5	2972.77	1269651
	2975.43	1423998	2938.48	574	2975.43	5623824
	2978.09	-3287606	2941.15	553.5	2978.09	-2584348
	2980.75	-2940286	2943.82	560	2980.75	-1631862
	2983.4	2932796	2946.49	567	2983.4	-3305637
	2986.06	-2371034	2949.16	575.5	2986.06	862165
	2988.71	3025898	2951.83	567.5	2988.71	2903711
	2991.37	6001918	2954.5	565	2991.37	2530832
	2994.02	6435703	2957.16	548	2994.02	1677701
	2996.68	-1385426	2959.83	557	2996.68	0.19145
	2999.33	219821	2962.49	537.5	2999.33	47534
			2965.16	560
			2967.82	552.5
			2970.48	551.5
			2973.14	561
			2975.8	545.5
			2978.46	552.5
			2981.12	544.5
			2983.77	536.5
			2986.43	538
			2989.08	553
			2991.74	556.5
			2994.39	523
			2997.04	540.5
			2999.7	530

## Sheet: Li||Li 0.5 mA cm-2
Name	Time	Voltage	Voltage	Voltage	Voltage	Voltage	Voltage	Voltage	Voltage
Unit	[h]	[V]	[V]	[V]	[V]	[V]	[V]	[V]	[V]
Comment		BM-LiLirp-24	BM-LiLirp-23	BM-LiN-26	BM-LiN-47	BM-LiN-49	BM-LZLN-30	BM-LZLN-31	BM-LZLN-32
	0	0.0011	-0.0008	0.0207	0.0082	-0.0016	0.0079	0.0045	-0.0018
	0.0167	0.0018	-0.0008	0.0187	0.0071	-0.0004	0.0068	0.0033	-0.0016
	0.0333	0.0016	-0.0002	0.0172	0.0066	-0.0005	0.0062	0.0031	-0.0013
	0.05	0.0014	-0.0001	0.0155	0.0062	-0.0005	0.0059	0.0031	-0.0011
	0.0667	0.0018	-0.0001	0.0144	0.0057	-0.0004	0.0054	0.003	-0.001
	0.0833	0.0018	-0.0002	0.0137	0.0054	-0.0004	0.0054	0.0027	-0.001
	0.1	0.0019	-0.0002	0.0124	0.0051	-0.0004	0.005	0.0027	-0.0014
	0.1167	0.0016	-0.0002	0.0121	0.0047	-0.0002	0.0048	0.0024	-0.0013
	0.1333	0.0014	-0.0001	0.0114	0.0047	-0.0004	0.0047	0.0024	-0.0013
	0.15	0.0018	-0.0002	0.0109	0.0043	-0.0002	0.0045	0.0025	-0.001
	0.1667	0.0018	-0.0002	0.0105	0.0039	-0.0002	0.0042	0.0024	-0.0008
	0.1667	-0.5271	-0.0002	-0.3544	-0.2593	-0.3951	-0.3611	-0.3164	-0.3703
	0.1671	-0.4984	-0.5534	-0.4125	-0.3144	-0.4463	-0.4127	-0.3672	-0.4205
	0.1754	-0.462	-0.5029	-0.3661	-0.2993	-0.4	-0.4022	-0.3753	-0.4133
	0.1838	-0.4386	-0.4582	-0.3458	-0.2889	-0.3616	-0.3816	-0.3677	-0.3986
	0.1921	-0.4228	-0.4337	-0.3344	-0.2819	-0.3373	-0.3608	-0.3574	-0.3822
	0.2004	-0.4101	-0.4174	-0.3254	-0.2753	-0.3196	-0.3428	-0.3477	-0.3669
	0.2088	-0.3999	-0.4052	-0.3187	-0.2689	-0.3056	-0.3291	-0.3379	-0.3532
	0.2171	-0.391	-0.3944	-0.3135	-0.2624	-0.2941	-0.3175	-0.3294	-0.3414
	0.2254	-0.3829	-0.3852	-0.3095	-0.256	-0.2848	-0.308	-0.3211	-0.3318
	0.2338	-0.3761	-0.3776	-0.3059	-0.2496	-0.2764	-0.3002	-0.3143	-0.3236
	0.2421	-0.3701	-0.3707	-0.3024	-0.2433	-0.2696	-0.2937	-0.3079	-0.3169
	0.2504	-0.3646	-0.3646	-0.2996	-0.2372	-0.2634	-0.2883	-0.3022	-0.3104
	0.2588	-0.3596	-0.3588	-0.2967	-0.2316	-0.2576	-0.2833	-0.2972	-0.305
	0.2671	-0.3553	-0.3536	-0.2944	-0.2265	-0.2525	-0.2787	-0.2926	-0.3005
	0.2754	-0.3515	-0.3489	-0.292	-0.2213	-0.2474	-0.275	-0.288	-0.2963
	0.2838	-0.348	-0.3449	-0.2902	-0.2169	-0.2433	-0.2715	-0.284	-0.2923
	0.2921	-0.3446	-0.341	-0.2885	-0.2128	-0.2393	-0.2682	-0.2808	-0.2886
	0.3004	-0.3423	-0.3373	-0.2868	-0.209	-0.2355	-0.2654	-0.2773	-0.2854
	0.3088	-0.3396	-0.3339	-0.2851	-0.2058	-0.2322	-0.2628	-0.2743	-0.2825
	0.3171	-0.337	-0.331	-0.284	-0.2026	-0.2288	-0.2601	-0.2717	-0.2793
	0.3254	-0.3353	-0.3283	-0.2825	-0.1998	-0.2256	-0.258	-0.2689	-0.2766
	0.3338	-0.3329	-0.3259	-0.2816	-0.1974	-0.2229	-0.2555	-0.2663	-0.2737
	0.3421	-0.331	-0.3233	-0.2805	-0.1951	-0.2201	-0.2538	-0.2641	-0.2712
	0.3504	-0.3292	-0.3208	-0.2798	-0.1928	-0.2175	-0.2517	-0.2621	-0.2689
	0.3588	-0.3277	-0.3188	-0.2786	-0.191	-0.2152	-0.2499	-0.2598	-0.2668
	0.3671	-0.3263	-0.3167	-0.2781	-0.1893	-0.2131	-0.2477	-0.258	-0.265
	0.3754	-0.3248	-0.3152	-0.2772	-0.1878	-0.2111	-0.2461	-0.256	-0.2627
	0.3838	-0.3233	-0.3133	-0.2766	-0.1862	-0.2091	-0.2444	-0.254	-0.2605
	0.3921	-0.3219	-0.3117	-0.276	-0.185	-0.2073	-0.243	-0.2528	-0.259
	0.4004	-0.3208	-0.3101	-0.275	-0.1836	-0.2055	-0.2413	-0.2509	-0.257
	0.4088	-0.3194	-0.3088	-0.2746	-0.1826	-0.2038	-0.2401	-0.2494	-0.2555
	0.4171	-0.3182	-0.3072	-0.274	-0.1814	-0.2023	-0.2387	-0.2482	-0.254
	0.4254	-0.3173	-0.3059	-0.2735	-0.1804	-0.201	-0.2375	-0.2467	-0.2526
	0.4338	-0.3162	-0.3048	-0.2729	-0.1794	-0.1994	-0.2363	-0.2456	-0.2509
	0.4421	-0.3152	-0.3034	-0.2726	-0.1788	-0.1984	-0.2351	-0.2444	-0.2496
	0.4504	-0.3143	-0.3025	-0.2718	-0.1778	-0.1971	-0.2338	-0.2428	-0.2482
	0.4588	-0.3135	-0.3011	-0.2714	-0.1772	-0.1965	-0.2328	-0.2418	-0.2468
	0.4671	-0.3123	-0.3004	-0.2709	-0.1763	-0.1951	-0.2316	-0.2409	-0.2461
	0.4754	-0.3117	-0.2992	-0.2705	-0.1757	-0.1942	-0.2306	-0.2396	-0.2448
	0.4838	-0.3111	-0.2984	-0.2702	-0.1752	-0.1933	-0.2296	-0.2386	-0.2438
	0.4921	-0.31	-0.2975	-0.2696	-0.1748	-0.1925	-0.2287	-0.2377	-0.2424
	0.5004	-0.3091	-0.2966	-0.2692	-0.1742	-0.1917	-0.2274	-0.2366	-0.2416
	0.5088	-0.3086	-0.2958	-0.2689	-0.1739	-0.1911	-0.2267	-0.2357	-0.2406
	0.5171	-0.3075	-0.295	-0.2685	-0.1734	-0.1907	-0.2258	-0.2351	-0.2398
	0.5254	-0.3069	-0.2944	-0.268	-0.173	-0.1899	-0.2248	-0.2343	-0.2389
	0.5338	-0.3066	-0.2938	-0.2677	-0.1727	-0.1893	-0.2241	-0.2334	-0.2378
	0.5421	-0.3062	-0.2927	-0.2673	-0.1725	-0.1885	-0.2233	-0.2325	-0.2372
	0.5504	-0.3053	-0.2917	-0.267	-0.1719	-0.1881	-0.2224	-0.2319	-0.236
	0.5588	-0.3048	-0.2915	-0.2668	-0.1719	-0.1878	-0.2216	-0.2309	-0.2352
	0.5671	-0.304	-0.2906	-0.2663	-0.1714	-0.1872	-0.2206	-0.2302	-0.2343
	0.5754	-0.3036	-0.2902	-0.2662	-0.1711	-0.1867	-0.2201	-0.2296	-0.2337
	0.5838	-0.3031	-0.2894	-0.266	-0.171	-0.1865	-0.2192	-0.2288	-0.2328
	0.5921	-0.3024	-0.2891	-0.2656	-0.1708	-0.1864	-0.2184	-0.228	-0.2319
	0.6004	-0.3022	-0.2885	-0.2656	-0.1705	-0.1861	-0.2175	-0.2274	-0.2313
	0.6088	-0.3014	-0.2879	-0.2651	-0.1702	-0.1855	-0.2169	-0.2265	-0.2308
	0.6171	-0.3011	-0.2873	-0.2648	-0.1701	-0.1853	-0.2163	-0.2259	-0.2297
	0.6254	-0.3007	-0.2871	-0.2648	-0.1698	-0.185	-0.2155	-0.2253	-0.2291
	0.6338	-0.3002	-0.2866	-0.2644	-0.1698	-0.1849	-0.2146	-0.2244	-0.2284
	0.6421	-0.2996	-0.2862	-0.2641	-0.1693	-0.1844	-0.2143	-0.2233	-0.2279
	0.6504	-0.2995	-0.2857	-0.2638	-0.1693	-0.1843	-0.2134	-0.2227	-0.2273
	0.6588	-0.299	-0.2856	-0.2638	-0.1691	-0.1843	-0.2129	-0.2221	-0.2268
	0.6671	-0.2988	-0.2848	-0.2633	-0.1691	-0.1841	-0.2125	-0.2216	-0.2258
	0.6754	-0.2984	-0.2848	-0.263	-0.1687	-0.1839	-0.2117	-0.2213	-0.225
	0.6838	-0.2981	-0.2842	-0.263	-0.1685	-0.1839	-0.2113	-0.2206	-0.2244
	0.6921	-0.2979	-0.284	-0.2627	-0.1685	-0.1839	-0.2105	-0.2198	-0.2239
	0.7004	-0.2975	-0.2834	-0.2627	-0.1682	-0.1836	-0.2103	-0.2197	-0.2235
	0.7088	-0.2969	-0.2833	-0.2624	-0.1682	-0.1835	-0.2096	-0.2192	-0.223
	0.7171	-0.2969	-0.2827	-0.2621	-0.1682	-0.1833	-0.209	-0.2187	-0.2222
	0.7254	-0.2964	-0.2824	-0.2618	-0.1681	-0.1835	-0.2085	-0.2181	-0.2218
	0.7338	-0.2961	-0.2819	-0.2615	-0.1682	-0.1832	-0.2079	-0.2177	-0.2215
	0.7421	-0.2959	-0.2818	-0.2612	-0.1681	-0.1832	-0.2071	-0.2172	-0.221
	0.7504	-0.2956	-0.2813	-0.2609	-0.1679	-0.183	-0.207	-0.2168	-0.2204
	0.7588	-0.295	-0.281	-0.2607	-0.1676	-0.1832	-0.2065	-0.2164	-0.2203
	0.7671	-0.2947	-0.2807	-0.2607	-0.1678	-0.183	-0.2061	-0.2158	-0.2197
	0.7754	-0.2946	-0.2804	-0.2605	-0.1676	-0.1832	-0.2056	-0.2154	-0.2193
	0.7838	-0.2941	-0.2801	-0.2599	-0.1675	-0.1832	-0.2055	-0.2151	-0.2187
	0.7921	-0.294	-0.2799	-0.2598	-0.1673	-0.183	-0.2049	-0.2148	-0.2184
	0.8004	-0.294	-0.2799	-0.2598	-0.1673	-0.1832	-0.2042	-0.2145	-0.2178
	0.8088	-0.2937	-0.2795	-0.2595	-0.1672	-0.183	-0.2041	-0.2142	-0.2175
	0.8171	-0.2935	-0.2793	-0.2593	-0.167	-0.183	-0.2036	-0.2137	-0.2174
	0.8254	-0.2932	-0.2789	-0.259	-0.167	-0.1827	-0.2032	-0.2129	-0.2166
	0.8338	-0.293	-0.2787	-0.2589	-0.1666	-0.1827	-0.2032	-0.2126	-0.2163
	0.8421	-0.293	-0.2789	-0.2586	-0.1664	-0.1829	-0.2024	-0.2122	-0.2157
	0.8504	-0.2924	-0.2784	-0.2586	-0.1662	-0.1824	-0.2021	-0.212	-0.2152
	0.8588	-0.2923	-0.2782	-0.2581	-0.1661	-0.1824	-0.2018	-0.2116	-0.2146
	0.8671	-0.292	-0.2779	-0.2581	-0.1659	-0.1823	-0.2013	-0.211	-0.2145
	0.8754	-0.2917	-0.2778	-0.2578	-0.1658	-0.1824	-0.2009	-0.2107	-0.2137
	0.8838	-0.2914	-0.2775	-0.2576	-0.1656	-0.1821	-0.2009	-0.2103	-0.2137
	0.8921	-0.2912	-0.2776	-0.2575	-0.1655	-0.1818	-0.2003	-0.2099	-0.2132
	0.9004	-0.2911	-0.2773	-0.2573	-0.1652	-0.182	-0.2001	-0.2094	-0.2123
	0.9088	-0.2911	-0.2772	-0.2572	-0.1652	-0.1818	-0.1998	-0.2091	-0.2123
	0.9171	-0.2905	-0.277	-0.2569	-0.165	-0.1818	-0.1995	-0.209	-0.2117
	0.9254	-0.2905	-0.2766	-0.257	-0.1647	-0.1818	-0.1992	-0.2087	-0.2114
	0.9338	-0.2903	-0.2767	-0.2566	-0.1647	-0.1815	-0.1992	-0.2081	-0.211
	0.9421	-0.29	-0.2764	-0.2566	-0.1646	-0.1817	-0.1987	-0.2078	-0.2103
	0.9504	-0.2897	-0.2761	-0.2563	-0.1646	-0.1817	-0.198	-0.2074	-0.21
	0.9588	-0.2895	-0.2761	-0.2564	-0.1641	-0.1814	-0.1981	-0.2071	-0.2094
	0.9671	-0.2892	-0.2757	-0.2561	-0.164	-0.1814	-0.1977	-0.207	-0.2093
	0.9754	-0.2894	-0.2752	-0.2558	-0.164	-0.1814	-0.1975	-0.2065	-0.2088
	0.9838	-0.2889	-0.2752	-0.2558	-0.164	-0.181	-0.1971	-0.2062	-0.2084
	0.9921	-0.2886	-0.2749	-0.2557	-0.1638	-0.181	-0.1971	-0.2056	-0.2078
	10004	-0.2886	-0.275	-0.2555	-0.1635	-0.1809	-0.1966	-0.2056	-0.2074
	10088	-0.2885	-0.2747	-0.2554	-0.1635	-0.1807	-0.1965	-0.2053	-0.2071
	10171	-0.2879	-0.2746	-0.2551	-0.1629	-0.1807	-0.1963	-0.2049	-0.2065
	10254	-0.288	-0.2744	-0.2551	-0.1629	-0.1807	-0.1957	-0.2045	-0.2062
	10338	-0.2879	-0.2743	-0.2551	-0.1626	-0.1804	-0.1955	-0.2042	-0.2058
	10421	-0.2876	-0.274	-0.2549	-0.1626	-0.1803	-0.1954	-0.2041	-0.2053
	10504	-0.2869	-0.274	-0.2546	-0.1623	-0.1803	-0.1952	-0.2039	-0.205
	10588	-0.2869	-0.2738	-0.2544	-0.1621	-0.18	-0.1951	-0.2036	-0.2045
	10671	-0.2866	-0.2735	-0.2543	-0.1621	-0.18	-0.1943	-0.2033	-0.2042
	10754	-0.2863	-0.2734	-0.254	-0.1618	-0.1797	-0.1943	-0.2027	-0.2038
	10838	-0.286	-0.2732	-0.2537	-0.1618	-0.1798	-0.1942	-0.2024	-0.2035
	10921	-0.2859	-0.2731	-0.2537	-0.1617	-0.1794	-0.194	-0.2021	-0.2032
	11004	-0.2857	-0.2731	-0.2535	-0.1614	-0.1794	-0.194	-0.202	-0.2024
	11088	-0.2856	-0.2729	-0.2532	-0.1612	-0.1791	-0.1937	-0.2015	-0.2023
	11171	-0.2853	-0.2726	-0.2532	-0.1611	-0.1786	-0.1934	-0.2013	-0.2018
	11254	-0.285	-0.2724	-0.2529	-0.1606	-0.1788	-0.193	-0.2007	-0.2013
	11338	-0.2845	-0.272	-0.2526	-0.1609	-0.1786	-0.1931	-0.2007	-0.2007
	11421	-0.2844	-0.2721	-0.2526	-0.1606	-0.1781	-0.1928	-0.2004	-0.2004
	11504	-0.2842	-0.2717	-0.2525	-0.1606	-0.1783	-0.1925	-0.2	-0.1998
	11588	-0.284	-0.2717	-0.2523	-0.1606	-0.1781	-0.1923	-0.1995	-0.1995
	11667	0.1539	-0.2714	-0.2522	-0.1603	-0.178	-0.1922	-0.1991	-0.1991
	11667	0.1392	-0.2712	0.1107	0.097	0.1147	0.0883	0.0898	0.0895
	1175	0.1298	0.1582	0.1276	0.127	0.117	0.1162	0.1318	0.1325
	11833	0.1278	0.1548	0.1186	0.1217	0.111	0.1028	0.1229	0.1287
	11917	0.1305	0.1415	0.1179	0.118	0.1095	0.0965	0.117	0.1286
	1.2	0.1391	0.1373	0.1209	0.1159	0.1096	0.0924	0.1128	0.1302
	12083	0.1585	0.1392	0.127	0.1153	0.1112	0.0896	0.1098	0.1366
	12167	0.1952	0.1485	0.1398	0.1162	0.1141	0.0881	0.1081	0.1493
	1225	0.2396	0.1644	0.1603	0.1186	0.1191	0.0864	0.107	0.1679
	12333	0.2607	0.1781	0.1943	0.1223	0.1257	0.0858	0.1066	0.1987
	12417	0.2634	0.1937	0.2418	0.1254	0.1351	0.0849	0.1075	0.23
	1.25	0.2691	0.2139	0.292	0.1292	0.1438	0.0846	0.1087	0.2679
	12583	0.29	0.2604	0.3426	0.1315	0.1505	0.0843	0.1106	0.2982
	12667	0.3227	0.3109	0.3936	0.1322	0.1551	0.0842	0.1133	0.315
	1275	0.3477	0.3613	0.4112	0.1318	0.1554	0.0843	0.1167	0.3144
	12833	0.3568	0.3802	0.387	0.1316	0.1551	0.0845	0.1214	0.3082
	12917	0.3567	0.3744	0.3764	0.1319	0.154	0.0858	0.1264	0.3004
	1.3	0.3539	0.364	0.3678	0.1327	0.1536	0.0864	0.1333	0.2921
	13083	0.3491	0.3562	0.3611	0.1341	0.1533	0.0878	0.1421	0.2842
	13167	0.3454	0.3567	0.3548	0.1363	0.1533	0.089	0.156	0.2781
	1325	0.3404	0.3509	0.3494	0.1385	0.1537	0.0903	0.1748	0.272
	13333	0.3353	0.3492	0.3449	0.1415	0.155	0.0915	0.1937	0.2673
	13417	0.3304	0.3455	0.341	0.1447	0.1571	0.093	0.2073	0.2624
	1.35	0.3262	0.3411	0.3371	0.1473	0.1598	0.0944	0.2193	0.2586
	13583	0.322	0.3373	0.3338	0.1514	0.1633	0.0965	0.2277	0.2549
	13667	0.319	0.3339	0.3306	0.1569	0.1667	0.0983	0.234	0.2512
	1375	0.3158	0.3307	0.3278	0.1629	0.1708	0.1006	0.2399	0.2479
	13833	0.313	0.3278	0.3249	0.171	0.176	0.1035	0.2453	0.2444
	13917	0.3104	0.3252	0.3223	0.1806	0.1818	0.1064	0.25	0.2419
	1.4	0.3086	0.3231	0.3198	0.1928	0.1901	0.1102	0.2512	0.239
	14083	0.3063	0.321	0.3173	0.2049	0.1977	0.1139	0.2511	0.2367
	14167	0.3048	0.3188	0.3152	0.2166	0.2056	0.1182	0.2508	0.2345
	1425	0.3028	0.3175	0.3129	0.2274	0.2152	0.124	0.2506	0.2322
	14333	0.3017	0.3194	0.3111	0.2386	0.2244	0.1331	0.2494	0.23
	14417	0.3001	0.3179	0.3089	0.2444	0.2326	0.1472	0.2476	0.228
	1.45	0.2984	0.3167	0.3072	0.2474	0.239	0.1699	0.2457	0.2264
	14583	0.2973	0.3162	0.3053	0.2465	0.2453	0.201	0.2436	0.2247
	14667	0.2958	0.3158	0.3037	0.2464	0.2491	0.2413	0.2415	0.2233
	1475	0.2949	0.3159	0.3017	0.2464	0.2508	0.2766	0.2396	0.2215
	14833	0.2938	0.3149	0.3002	0.2451	0.2511	0.297	0.2378	0.22
	14917	0.2924	0.3138	0.2984	0.2436	0.25	0.2975	0.2358	0.2186
	1.5	0.2917	0.3124	0.2972	0.2415	0.249	0.2908	0.2341	0.2168
	15083	0.2908	0.3109	0.2955	0.2393	0.2477	0.283	0.2325	0.2157
	15167	0.2897	0.3101	0.2941	0.2377	0.2464	0.2766	0.2313	0.2143
	1525	0.2888	0.3089	0.2924	0.2358	0.2438	0.2708	0.2299	0.2131
	15333	0.2882	0.3079	0.2911	0.2331	0.243	0.266	0.2282	0.212
	15417	0.2874	0.3069	0.29	0.232	0.2404	0.2625	0.2273	0.2107
	1.55	0.2863	0.3054	0.2885	0.2306	0.2401	0.2593	0.2261	0.2091
	15583	0.2856	0.3048	0.2873	0.2291	0.2392	0.2564	0.225	0.2085
	15667	0.285	0.3036	0.2863	0.2276	0.238	0.2538	0.2239	0.207
	1575	0.2839	0.3022	0.285	0.2262	0.237	0.2515	0.2224	0.2021
	15833	0.2831	0.3017	0.2836	0.2251	0.2354	0.2494	0.2215	0.2047
	15917	0.2821	0.3002	0.2827	0.2239	0.2352	0.2471	0.2204	0.2041
	1.6	0.2816	0.2992	0.2813	0.2222	0.234	0.245	0.2197	0.203
	16083	0.281	0.2979	0.2804	0.2213	0.2332	0.2433	0.2186	0.2021
	16167	0.2805	0.297	0.2793	0.2206	0.2322	0.2418	0.2174	0.2012
	1625	0.2799	0.2959	0.2779	0.2195	0.2314	0.2403	0.2163	0.2003
	16333	0.2787	0.2949	0.277	0.2186	0.2305	0.2386	0.2155	0.1994
	16417	0.2782	0.2941	0.276	0.2178	0.2299	0.2366	0.2128	0.1986
	1.65	0.2779	0.2932	0.2749	0.2169	0.2291	0.2351	0.2139	0.1981
	16583	0.2769	0.2921	0.2738	0.2161	0.2282	0.2334	0.2128	0.1969
	16667	0.2763	0.2914	0.2729	0.2155	0.2276	0.2319	0.2122	0.1963
	1675	0.2757	0.2903	0.2717	0.2148	0.2267	0.2303	0.2113	0.1952
	16833	0.275	0.2923	0.2711	0.2142	0.2261	0.2291	0.2107	0.1946
	16917	0.2743	0.2915	0.27	0.2136	0.2255	0.2277	0.2097	0.1939
	1.7	0.2737	0.2906	0.2691	0.2128	0.2248	0.2267	0.2091	0.1931
	17083	0.2731	0.2902	0.2679	0.2122	0.2238	0.2255	0.2085	0.1923
	17167	0.2724	0.2891	0.267	0.2117	0.2232	0.2244	0.2076	0.1916
	1725	0.2717	0.2883	0.2662	0.2111	0.2227	0.2232	0.207	0.1913
	17333	0.2712	0.2876	0.2654	0.2107	0.2221	0.2224	0.2061	0.1904
	17417	0.2708	0.2866	0.2644	0.2102	0.2218	0.2213	0.2058	0.187
	1.75	0.27	0.286	0.2636	0.2093	0.2207	0.2204	0.205	0.1867
	17583	0.2696	0.2854	0.2627	0.209	0.2201	0.219	0.2044	0.1885
	17667	0.2686	0.2845	0.2622	0.2085	0.2197	0.2187	0.2039	0.1878
	1775	0.2682	0.2836	0.261	0.2084	0.2189	0.2174	0.2033	0.1873
	17833	0.2677	0.2828	0.2605	0.2076	0.2184	0.2166	0.2029	0.1844
	17917	0.2671	0.2821	0.2595	0.2071	0.218	0.2155	0.2023	0.1861
	1.8	0.2665	0.2811	0.2589	0.2067	0.2172	0.2148	0.2018	0.1855
	18083	0.2659	0.2804	0.2578	0.2064	0.2166	0.2139	0.2013	0.185
	18167	0.2653	0.2798	0.2572	0.2058	0.216	0.2131	0.2007	0.1843
	1825	0.2647	0.2792	0.2566	0.2053	0.2152	0.2122	0.2006	0.1839
	18333	0.2641	0.2787	0.2557	0.2049	0.2148	0.2116	0.2001	0.1824
	18417	0.2638	0.2778	0.2549	0.2045	0.2145	0.211	0.1994	0.183
	1.85	0.2631	0.2769	0.2544	0.2041	0.214	0.2099	0.1992	0.1823
	18583	0.2627	0.2766	0.2534	0.2036	0.2132	0.2094	0.1965	0.1817
	18667	0.2622	0.2758	0.2526	0.2033	0.2126	0.2087	0.1984	0.1814
	1875	0.2616	0.2753	0.2522	0.2029	0.212	0.2082	0.1981	0.1809
	18833	0.261	0.2747	0.2515	0.2021	0.2114	0.2074	0.198	0.1804
	18917	0.2604	0.274	0.2509	0.2018	0.211	0.2068	0.1977	0.1801
	1.9	0.2599	0.2734	0.25	0.2015	0.2103	0.2064	0.1974	0.1795
	19083	0.2595	0.2729	0.2493	0.201	0.2097	0.2055	0.1971	0.1792
	19167	0.2587	0.2721	0.2486	0.2006	0.2091	0.2047	0.1965	0.1786
	1925	0.2584	0.2717	0.2482	0.2003	0.2087	0.2041	0.1946	0.1781
	19333	0.2576	0.2711	0.2473	0.1998	0.2082	0.2036	0.1958	0.1777
	19417	0.257	0.2708	0.2467	0.1992	0.2074	0.2032	0.1951	0.176
	1.95	0.2567	0.2699	0.2462	0.1989	0.2068	0.2027	0.1951	0.1759
	19583	0.256	0.2696	0.2456	0.1984	0.2062	0.2021	0.1948	0.1765
	19667	0.2555	0.2692	0.245	0.1981	0.2056	0.2015	0.1943	0.1763
	1975	0.2551	0.2686	0.2444	0.1977	0.2053	0.2007	0.1943	0.1759
	19833	0.2544	0.2683	0.2436	0.1975	0.2049	0.2006	0.1937	0.1754
	19917	0.254	0.2674	0.243	0.1972	0.2041	0.2	0.1934	0.1748
	2	0.2532	0.2671	0.2422	0.1966	0.2038	0.1966	0.193	0.1748
	20083	0.2531	0.2663	0.2419	0.1963	0.2032	0.1971	0.1911	0.1743
	20167	0.2523	0.2659	0.2412	0.1958	0.2026	0.1986	0.1922	0.174
	2025	0.252	0.2651	0.2409	0.1954	0.202	0.198	0.1919	0.1725
	20333	0.2517	0.2648	0.2403	0.1949	0.2016	0.1977	0.1914	0.1727
	20417	0.2509	0.265	0.2395	0.1946	0.2012	0.1972	0.191	0.172
	2.05	0.2505	0.2696	0.239	0.194	0.2007	0.1968	0.1907	0.1724
	20583	0.25	0.2696	0.2384	0.1939	0.2	0.1965	0.1904	0.1719
	20667	0.2494	0.2702	0.238	0.1934	0.1995	0.1958	0.1897	0.1719
	2075	0.2491	0.2697	0.2375	0.1931	0.1991	0.1937	0.1879	0.1717
	20833	0.2482	0.2689	0.2369	0.1928	0.1986	0.1937	0.1881	0.1713
	20917	0.2482	0.2686	0.2363	0.1923	0.1983	0.1908	0.1879	0.1707
	2.1	0.2473	0.2682	0.2357	0.1917	0.1974	0.1939	0.1885	0.1707
	21083	0.247	0.2677	0.2352	0.1914	0.1969	0.1942	0.1882	0.1702
	21167	0.2461	0.2668	0.2349	0.1911	0.1966	0.1936	0.1878	0.1702
	2125	0.2459	0.2663	0.2345	0.1907	0.196	0.1934	0.1873	0.1698
	21333	0.2453	0.266	0.2338	0.1904	0.1955	0.1914	0.187	0.1695
	21417	0.2448	0.2654	0.2334	0.1899	0.1949	0.1922	0.1867	0.1693
	2.15	0.2441	0.265	0.2326	0.1897	0.1945	0.1916	0.1864	0.169
	21583	0.2438	0.2644	0.2322	0.1894	0.1942	0.1917	0.1858	0.1688
	21667	-0.1456	0.2638	0.2316	0.189	0.1939	0.1913	0.185	0.1685
	21667	-0.1164	0.2636	0.2313	-0.1131	-0.1312	-0.0721	-0.064	-0.0771
	2175	-0.1046	0.2631	0.2309	-0.1257	-0.1269	-0.0973	-0.1122	-0.1127
	21833	-0.0988	0.2631	-0.0942	-0.1167	-0.117	-0.0884	-0.1084	-0.1029
	21917	-0.0961	-0.1592	-0.1113	-0.1139	-0.1154	-0.0831	-0.1048	-0.0933
	2.2	-0.0947	-0.1191	-0.0977	-0.1148	-0.1202	-0.08	-0.0988	-0.088
	22083	-0.0945	-0.1109	-0.09	-0.1192	-0.1279	-0.0771	-0.0956	-0.0849
	22167	-0.0959	-0.1078	-0.0858	-0.1232	-0.1347	-0.0752	-0.0925	-0.0835
	2225	-0.0988	-0.109	-0.0843	-0.1272	-0.1385	-0.0738	-0.091	-0.0835
	22333	-0.1029	-0.1135	-0.0842	-0.1292	-0.1379	-0.0723	-0.0901	-0.0848
	22417	-0.1102	-0.1203	-0.0851	-0.1295	-0.1348	-0.071	-0.0906	-0.086
	2.25	-0.1226	-0.1276	-0.0864	-0.1278	-0.1304	-0.0701	-0.0913	-0.0877
	22583	-0.1382	-0.1351	-0.088	-0.1257	-0.1264	-0.0692	-0.0924	-0.0895
	22667	-0.1487	-0.1427	-0.0895	-0.1225	-0.1221	-0.0684	-0.0938	-0.0916
	2275	-0.1575	-0.1493	-0.0912	-0.1197	-0.1189	-0.0677	-0.0951	-0.0939
	22833	-0.1647	-0.1559	-0.093	-0.117	-0.1157	-0.0675	-0.0968	-0.0965
	22917	-0.1725	-0.1624	-0.0953	-0.1141	-0.1131	-0.0674	-0.0988	-0.0991
	2.3	-0.181	-0.1679	-0.0973	-0.1121	-0.1109	-0.0669	-0.1006	-0.1014
	23083	-0.1893	-0.1734	-0.0996	-0.1101	-0.1086	-0.0666	-0.1023	-0.1044
	23167	-0.1998	-0.1781	-0.1022	-0.1087	-0.107	-0.0666	-0.1043	-0.1073
	2325	-0.211	-0.1815	-0.1055	-0.1072	-0.1052	-0.0665	-0.106	-0.1109
	23333	-0.2218	-0.1846	-0.109	-0.1063	-0.1035	-0.0666	-0.1077	-0.1145
	23417	-0.2325	-0.1876	-0.1128	-0.1054	-0.1025	-0.0668	-0.1092	-0.1186
	2.35	-0.2438	-0.1914	-0.1171	-0.1046	-0.1014	-0.0671	-0.111	-0.1231
	23583	-0.2523	-0.1946	-0.1225	-0.1037	-0.1006	-0.0675	-0.1128	-0.1281
	23667	-0.2596	-0.1975	-0.1276	-0.1034	-0.1	-0.0677	-0.1142	-0.1342
	2375	-0.2642	-0.2012	-0.1344	-0.1026	-0.0996	-0.0684	-0.1159	-0.1409
	23833	-0.2673	-0.2045	-0.1423	-0.1025	-0.099	-0.069	-0.1174	-0.1489
	23917	-0.2685	-0.2082	-0.1505	-0.1023	-0.0985	-0.07	-0.1192	-0.1565
	2.4	-0.2703	-0.2134	-0.1606	-0.1022	-0.0982	-0.0712	-0.1206	-0.1643
	24083	-0.2703	-0.2172	-0.1717	-0.1023	-0.0982	-0.0723	-0.1225	-0.1716
	24167	-0.2709	-0.2206	-0.182	-0.1025	-0.0983	-0.0738	-0.1238	-0.1783
	2425	-0.2711	-0.2232	-0.1925	-0.1029	-0.098	-0.0755	-0.126	-0.1841
	24333	-0.2697	-0.2273	-0.2018	-0.1034	-0.0986	-0.0773	-0.1279	-0.1897
	24417	-0.2697	-0.2296	-0.2103	-0.1038	-0.099	-0.0794	-0.1302	-0.1943
	2.45	-0.2692	-0.2326	-0.2166	-0.1051	-0.0996	-0.0814	-0.1327	-0.198
	24583	-0.2683	-0.236	-0.2206	-0.1058	-0.1003	-0.0828	-0.1353	-0.2006
	24667	-0.2674	-0.2374	-0.2218	-0.1066	-0.1009	-0.0846	-0.1382	-0.202
	2475	-0.2662	-0.2387	-0.2229	-0.1083	-0.1026	-0.0863	-0.1417	-0.2036
	24833	-0.2647	-0.2398	-0.2229	-0.1096	-0.1038	-0.0883	-0.1456	-0.2042
	24917	-0.2631	-0.2409	-0.2221	-0.1116	-0.1058	-0.0904	-0.1501	-0.2044
	2.5	-0.2627	-0.2406	-0.2219	-0.1142	-0.1081	-0.0929	-0.1559	-0.2042
	25083	-0.2613	-0.2398	-0.2215	-0.1176	-0.111	-0.0959	-0.1618	-0.2044
	25167	-0.2607	-0.2396	-0.2206	-0.1214	-0.1144	-0.0991	-0.1685	-0.2042
	2525	-0.2592	-0.2392	-0.2201	-0.126	-0.1185	-0.1028	-0.1751	-0.2032
	25333	-0.2581	-0.239	-0.2197	-0.1312	-0.1225	-0.1066	-0.181	-0.2024
	25417	-0.2572	-0.2387	-0.2181	-0.1374	-0.1278	-0.1106	-0.1868	-0.2013
	2.55	-0.2558	-0.238	-0.218	-0.1446	-0.1339	-0.1154	-0.1925	-0.1995
	25583	-0.2551	-0.237	-0.2174	-0.1518	-0.1414	-0.1211	-0.1969	-0.198
	25667	-0.254	-0.2363	-0.2172	-0.1594	-0.1501	-0.127	-0.2001	-0.1971
	2575	-0.2534	-0.2355	-0.2166	-0.1653	-0.1592	-0.1336	-0.2033	-0.196
	25833	-0.2517	-0.2345	-0.2161	-0.1698	-0.1682	-0.1415	-0.2052	-0.1945
	25917	-0.2509	-0.2337	-0.2154	-0.1717	-0.1757	-0.1502	-0.2071	-0.1931
	2.6	-0.25	-0.2329	-0.2151	-0.1725	-0.1792	-0.1598	-0.2081	-0.1922
	26083	-0.249	-0.2322	-0.2146	-0.173	-0.1804	-0.1693	-0.2084	-0.1908
	26167	-0.248	-0.2309	-0.2142	-0.173	-0.181	-0.1783	-0.2082	-0.1897
	2625	-0.2473	-0.2303	-0.2137	-0.173	-0.1806	-0.1853	-0.2074	-0.1891
	26333	-0.2464	-0.2294	-0.2131	-0.1728	-0.1804	-0.1914	-0.2065	-0.1879
	26417	-0.2454	-0.2287	-0.2126	-0.1725	-0.18	-0.1966	-0.2056	-0.1868
	2.65	-0.2445	-0.2279	-0.2126	-0.172	-0.1797	-0.2	-0.2044	-0.1859
	26583	-0.2438	-0.2271	-0.212	-0.1719	-0.1791	-0.2024	-0.2035	-0.185
	26667	-0.243	-0.2265	-0.2116	-0.1714	-0.1785	-0.2036	-0.2024	-0.1843
	2675	-0.2421	-0.2258	-0.2111	-0.1713	-0.178	-0.2047	-0.201	-0.1833
	26833	-0.241	-0.2248	-0.2111	-0.171	-0.1772	-0.2052	-0.1995	-0.1818
	26917	-0.2403	-0.2244	-0.2103	-0.1707	-0.1769	-0.2049	-0.1987	-0.1812
	2.7	-0.2396	-0.2233	-0.2102	-0.1705	-0.1762	-0.2047	-0.1977	-0.1803
	27083	-0.2386	-0.2227	-0.21	-0.1701	-0.1759	-0.2039	-0.1968	-0.1798
	27167	-0.2378	-0.2219	-0.2096	-0.1696	-0.1752	-0.2033	-0.1957	-0.1791
	2725	-0.2372	-0.2212	-0.209	-0.1693	-0.1746	-0.2026	-0.1948	-0.1785
	27333	-0.2364	-0.2206	-0.209	-0.1691	-0.1743	-0.2021	-0.1937	-0.1778
	27417	-0.2355	-0.2201	-0.2088	-0.1688	-0.1737	-0.201	-0.1925	-0.1772
	2.75	-0.2351	-0.2193	-0.2085	-0.1687	-0.1731	-0.2	-0.1917	-0.1765
	27583	-0.234	-0.219	-0.2082	-0.1685	-0.1728	-0.1991	-0.1908	-0.176
	27667	-0.2337	-0.218	-0.2078	-0.1682	-0.1724	-0.1981	-0.1901	-0.1756
	2775	-0.2329	-0.2177	-0.2076	-0.1679	-0.1717	-0.1969	-0.1891	-0.1751
	27833	-0.2317	-0.2169	-0.207	-0.1676	-0.1714	-0.1962	-0.1879	-0.1745
	27917	-0.2311	-0.2164	-0.207	-0.1675	-0.171	-0.1946	-0.1875	-0.1739
	2.8	-0.2306	-0.2157	-0.2067	-0.167	-0.1705	-0.1939	-0.1864	-0.1733
	28083	-0.23	-0.2149	-0.2067	-0.1672	-0.1702	-0.1928	-0.1855	-0.173
	28167	-0.2294	-0.2143	-0.2062	-0.1664	-0.1698	-0.192	-0.1852	-0.1722
	2825	-0.2285	-0.2139	-0.2062	-0.1667	-0.1695	-0.191	-0.1841	-0.1717
	28333	-0.2279	-0.2136	-0.2058	-0.1662	-0.1688	-0.1902	-0.1835	-0.1708
	28417	-0.2271	-0.2128	-0.2056	-0.1659	-0.1685	-0.1897	-0.1829	-0.1705
	2.85	-0.2267	-0.2123	-0.2053	-0.1658	-0.1679	-0.1885	-0.1824	-0.1705
	28583	-0.2261	-0.2123	-0.2052	-0.1656	-0.1676	-0.1876	-0.1817	-0.1699
	28667	-0.2251	-0.2111	-0.205	-0.1656	-0.1675	-0.1868	-0.1812	-0.1695
	2875	-0.2245	-0.2107	-0.205	-0.1653	-0.1672	-0.1861	-0.1807	-0.1691
	28833	-0.2241	-0.2102	-0.2045	-0.165	-0.1667	-0.1855	-0.1803	-0.1688
	28917	-0.2235	-0.2096	-0.2042	-0.165	-0.1664	-0.1849	-0.1798	-0.1685
	2.9	-0.2229	-0.2091	-0.2041	-0.1647	-0.1659	-0.1843	-0.1792	-0.1679
	29083	-0.2224	-0.2087	-0.2038	-0.1644	-0.1656	-0.1832	-0.1786	-0.1676
	29167	-0.2216	-0.2082	-0.2035	-0.1641	-0.1653	-0.1826	-0.1781	-0.1672
	2925	-0.2212	-0.2078	-0.2033	-0.1643	-0.1652	-0.182	-0.1777	-0.167
	29333	-0.2206	-0.2074	-0.2033	-0.164	-0.1647	-0.1814	-0.1772	-0.1666
	29417	-0.2198	-0.207	-0.203	-0.164	-0.1643	-0.18	-0.1768	-0.1661
	2.95	-0.2193	-0.2064	-0.2027	-0.1637	-0.164	-0.1798	-0.1763	-0.1659
	29583	-0.2189	-0.2061	-0.2026	-0.1633	-0.1638	-0.1795	-0.1759	-0.1655
	29667	-0.2181	-0.2056	-0.2024	-0.1633	-0.1635	-0.1791	-0.1752	-0.1652
	2975	-0.2175	-0.205	-0.2024	-0.163	-0.1632	-0.1785	-0.1749	-0.165
	29833	-0.2171	-0.2047	-0.2024	-0.1632	-0.1629	-0.1778	-0.1743	-0.1644
	29917	-0.2164	-0.2041	-0.2021	-0.1627	-0.1626	-0.1772	-0.1739	-0.1643
	3	-0.216	-0.2038	-0.2018	-0.1623	-0.1621	-0.1771	-0.1734	-0.164
	30083	-0.2154	-0.2035	-0.2016	-0.1624	-0.162	-0.1763	-0.1731	-0.1635
	30167	-0.2151	-0.203	-0.2016	-0.1621	-0.1615	-0.1759	-0.1724	-0.1632
	3025	-0.2146	-0.2026	-0.2013	-0.1621	-0.1614	-0.1754	-0.1722	-0.1627
	30333	-0.2136	-0.2023	-0.2012	-0.1617	-0.1612	-0.1745	-0.1716	-0.1626
	30417	-0.2131	-0.2016	-0.2009	-0.1617	-0.1608	-0.1743	-0.1713	-0.1624
	3.05	-0.2128	-0.2013	-0.2009	-0.1618	-0.1604	-0.1737	-0.1708	-0.1623
	30583	-0.212	-0.2009	-0.2009	-0.1614	-0.1604	-0.1734	-0.1705	-0.162
	30667	-0.2114	-0.2004	-0.2006	-0.1612	-0.16	-0.1728	-0.1701	-0.1617
	3075	-0.2108	-0.2001	-0.2004	-0.1611	-0.16	-0.1724	-0.1698	-0.1612
	30833	-0.2103	-0.1994	-0.2001	-0.1611	-0.1597	-0.1722	-0.1691	-0.1609
	30917	-0.2099	-0.1989	-0.2	-0.1611	-0.1592	-0.1716	-0.1685	-0.1611
	3.1	-0.2094	-0.1987	-0.1998	-0.1608	-0.1589	-0.1711	-0.1684	-0.1609
	31083	-0.209	-0.1983	-0.1998	-0.1608	-0.1588	-0.1708	-0.1681	-0.1603
	31167	-0.2085	-0.1978	-0.1997	-0.1606	-0.1586	-0.1702	-0.1679	-0.1601
	3125	-0.2082	-0.1977	-0.1995	-0.1606	-0.1585	-0.1698	-0.1678	-0.1598
	31333	-0.2076	-0.1971	-0.1991	-0.1603	-0.1585	-0.1696	-0.1672	-0.1595
	31417	-0.2071	-0.1966	-0.1991	-0.1603	-0.1582	-0.1691	-0.167	-0.1592
	3.15	-0.2065	-0.1962	-0.1991	-0.16	-0.1579	-0.169	-0.1669	-0.1591
	31583	-0.2062	-0.1962	-0.1987	-0.1601	-0.1575	-0.1684	-0.1666	-0.1588
	31667	0.1237	-0.1957	-0.1987	-0.1598	-0.1575	-0.1681	-0.1662	-0.1588
	31667	0.1206	-0.1951	-0.1986	0.1043	0.1081	0.0701	0.0663	0.0642
	3175	0.1157	-0.1952	-0.1984	0.1218	0.1052	0.0954	0.1043	0.1014
	31833	0.118	-0.1946	0.1154	0.1124	0.099	0.0907	0.1038	0.1014
	31917	0.1254	0.131	0.117	0.1075	0.0988	0.0861	0.0994	0.097
	3.2	0.1357	0.1234	0.1034	0.106	0.1014	0.0819	0.0941	0.0918
	32083	0.1476	0.118	0.0967	0.1078	0.1067	0.0777	0.0886	0.0866
	32167	0.1575	0.12	0.0929	0.1124	0.113	0.0748	0.0843	0.0826
	3225	0.1633	0.1273	0.0918	0.1176	0.1189	0.0721	0.0814	0.0794
	32333	0.1682	0.1397	0.0922	0.1186	0.1237	0.0701	0.0791	0.0773
	32417	0.1704	0.1514	0.0935	0.1151	0.1254	0.0683	0.078	0.0768
	3.25	0.1724	0.1632	0.0953	0.1106	0.1235	0.0672	0.0779	0.077
	32583	0.1752	0.1739	0.0967	0.1061	0.1188	0.0663	0.0785	0.0779
	32667	0.1775	0.1789	0.0977	0.1022	0.1131	0.0655	0.0788	0.0794
	3275	0.1798	0.1807	0.0985	0.0988	0.1078	0.0649	0.0797	0.0814
	32833	0.1812	0.1817	0.0991	0.0962	0.1037	0.0646	0.0809	0.0838
	32917	0.1821	0.185	0.0997	0.0942	0.1	0.0642	0.0817	0.0871
	3.3	0.1836	0.1838	0.1003	0.0924	0.097	0.0645	0.0829	0.09
	33083	0.1846	0.182	0.1006	0.0912	0.0942	0.0651	0.0837	0.0936
	33167	0.1859	0.182	0.1009	0.09	0.0921	0.0657	0.0848	0.0971
	3325	0.1879	0.1794	0.1017	0.0886	0.0904	0.0668	0.0858	0.1
	33333	0.1901	0.1766	0.1023	0.088	0.0889	0.068	0.0871	0.1029
	33417	0.1925	0.1742	0.1031	0.0874	0.0878	0.0694	0.0881	0.1052
	3.35	0.1957	0.1734	0.1041	0.0869	0.0869	0.0709	0.0893	0.108
	33583	0.1983	0.1731	0.1057	0.0866	0.0861	0.0718	0.0906	0.1106
	33667	0.2018	0.1728	0.107	0.0861	0.0852	0.0735	0.0915	0.1135
	3375	0.2044	0.1731	0.1089	0.0861	0.0848	0.075	0.0932	0.1168
	33833	0.2074	0.1734	0.111	0.0861	0.0843	0.0764	0.0948	0.1199
	33917	0.2103	0.1739	0.1128	0.086	0.0842	0.0777	0.0964	0.1238
	3.4	0.2128	0.1748	0.1154	0.086	0.0838	0.0796	0.0983	0.1275
	34083	0.2155	0.1763	0.1177	0.0861	0.084	0.0814	0.1	0.1316
	34167	0.2169	0.1783	0.1209	0.0864	0.0838	0.0832	0.1029	0.1362
	3425	0.2183	0.1806	0.1246	0.0867	0.084	0.0861	0.1063	0.1409
	34333	0.2195	0.1829	0.1284	0.0871	0.0838	0.0889	0.1093	0.1463
	34417	0.2207	0.1864	0.1322	0.0875	0.0838	0.0919	0.1122	0.1519
	3.45	0.2219	0.1901	0.1365	0.088	0.0845	0.0945	0.1154	0.1575
	34583	0.2224	0.1946	0.1426	0.0884	0.0846	0.0977	0.1196	0.163
	34667	0.2233	0.1997	0.149	0.0893	0.0851	0.1006	0.1235	0.1688
	3475	0.2239	0.2052	0.1553	0.0906	0.0857	0.1043	0.1283	0.1746
	34833	0.2244	0.2102	0.1615	0.0915	0.0863	0.1083	0.133	0.1795
	34917	0.2245	0.2157	0.1679	0.093	0.0872	0.1128	0.1394	0.1844
	3.5	0.2245	0.2201	0.1748	0.0941	0.0878	0.118	0.1456	0.1881
	35083	0.2241	0.2253	0.1807	0.0954	0.0889	0.1243	0.1518	0.191
	35167	0.2238	0.2297	0.1853	0.097	0.09	0.1318	0.1582	0.193
	3525	0.2236	0.2314	0.1901	0.099	0.0912	0.14	0.1649	0.1937
	35333	0.2224	0.2328	0.1937	0.1014	0.0924	0.1498	0.1708	0.1945
	35417	0.2219	0.2335	0.1969	0.1038	0.0944	0.1611	0.1765	0.194
	3.55	0.2215	0.2343	0.1997	0.1066	0.0968	0.1719	0.1815	0.1936
	35583	0.221	0.2341	0.202	0.1095	0.0988	0.1821	0.1849	0.1928
	35667	0.2201	0.234	0.2042	0.1133	0.1019	0.1911	0.1881	0.1922
	3575	0.2197	0.2338	0.2065	0.117	0.1051	0.1975	0.1894	0.1908
	35833	0.219	0.2337	0.2074	0.1211	0.1089	0.2013	0.191	0.1899
	35917	0.2183	0.2335	0.2091	0.1257	0.113	0.2035	0.1922	0.189
	3.6	0.218	0.2332	0.2102	0.1298	0.1176	0.2047	0.193	0.1881
	36083	0.2174	0.2328	0.2114	0.135	0.1229	0.2056	0.1934	0.1873
	36167	0.2171	0.2325	0.2116	0.14	0.1286	0.2055	0.1936	0.1861
	3625	0.2164	0.2322	0.2123	0.1461	0.135	0.2056	0.1907	0.1855
	36333	0.2157	0.2331	0.212	0.1516	0.142	0.2055	0.1933	0.1844
	36417	0.2154	0.236	0.2123	0.1575	0.149	0.2053	0.1928	0.1835
	3.65	0.2146	0.2357	0.2122	0.1632	0.1565	0.2047	0.1925	0.1827
	36583	0.2142	0.2357	0.2122	0.1676	0.1618	0.2042	0.1919	0.1821
	36667	0.2139	0.2355	0.2119	0.1716	0.1667	0.203	0.1916	0.181
	3675	0.2134	0.2351	0.2117	0.1752	0.1695	0.2018	0.191	0.1804
	36833	0.2128	0.2349	0.2113	0.1774	0.1713	0.2009	0.1904	0.1794
	36917	0.2123	0.2351	0.2113	0.178	0.173	0.1998	0.1893	0.1789
	3.7	0.2117	0.2345	0.2113	0.1785	0.1737	0.1986	0.1891	0.1783
	37083	0.2116	0.234	0.211	0.1794	0.1739	0.1977	0.1885	0.1777
	37167	0.2114	0.2337	0.2107	0.1798	0.1745	0.1972	0.1879	0.1769
	3725	0.2108	0.2335	0.2102	0.18	0.1743	0.1963	0.1875	0.1765
	37333	0.2105	0.2329	0.2099	0.1798	0.1742	0.1951	0.1868	0.1754
	37417	0.2102	0.2328	0.2097	0.1794	0.1742	0.1942	0.1862	0.1751
	3.75	0.2094	0.2322	0.2094	0.1794	0.1742	0.1933	0.1853	0.1745
	37583	0.2091	0.2317	0.2096	0.1789	0.1739	0.1928	0.1852	0.1728
	37667	0.2088	0.2313	0.2093	0.1786	0.174	0.1917	0.1844	0.1725
	3775	0.2084	0.2311	0.2091	0.1785	0.1737	0.191	0.1832	0.1724
	37833	0.2081	0.2308	0.2088	0.1781	0.1737	0.1904	0.1826	0.1719
	37917	0.2074	0.2306	0.2087	0.178	0.1734	0.1894	0.182	0.1716
	3.8	0.2071	0.2302	0.2082	0.1778	0.1733	0.1887	0.1815	0.171
	38083	0.2068	0.23	0.2078	0.1775	0.1734	0.1882	0.181	0.1707
	38167	0.2062	0.23	0.2076	0.1774	0.1731	0.1873	0.1803	0.1701
	3825	0.2061	0.2296	0.2071	0.1772	0.173	0.1867	0.1797	0.1696
	38333	0.2058	0.2291	0.207	0.1771	0.1728	0.1862	0.1792	0.1688
	38417	0.2053	0.229	0.207	0.1768	0.1725	0.1849	0.1786	0.1685
	3.85	0.2049	0.2284	0.2067	0.1768	0.1725	0.1847	0.1781	0.1679
	38583	0.2045	0.2284	0.2062	0.1765	0.1722	0.1843	0.1777	0.1676
	38667	0.2042	0.2279	0.2064	0.1762	0.1722	0.1836	0.1771	0.1672
	3875	0.2039	0.2274	0.2059	0.1762	0.1719	0.1832	0.1765	0.1667
	38833	0.2036	0.2271	0.2058	0.1762	0.1719	0.183	0.1757	0.1661
	38917	0.2033	0.2268	0.2056	0.1759	0.1716	0.1821	0.1728	0.1658
	3.9	0.2029	0.2264	0.2052	0.1759	0.1716	0.1817	0.1722	0.165
	39083	0.2024	0.2258	0.205	0.1757	0.1716	0.1809	0.1719	0.1649
	39167	0.2023	0.2258	0.2047	0.1757	0.1711	0.1806	0.1719	0.1643
	3925	0.2016	0.2255	0.2045	0.1754	0.1711	0.1798	0.1717	0.1638
	39333	0.2013	0.225	0.2041	0.1752	0.1711	0.1795	0.1731	0.1637
	39417	0.2009	0.2247	0.2038	0.1749	0.171	0.1791	0.1722	0.1632
	3.95	0.2007	0.2244	0.2036	0.1748	0.1708	0.1788	0.1722	0.1627
	39583	0.2003	0.2238	0.2033	0.1746	0.1705	0.178	0.1716	0.1623
	39667	0.2001	0.2235	0.2032	0.1748	0.1705	0.1778	0.1708	0.1617
	3975	0.1998	0.2229	0.2029	0.1746	0.1705	0.1774	0.1705	0.1615
	39833	0.1994	0.223	0.2026	0.1745	0.1704	0.1769	0.1702	0.1611
	39917	0.1991	0.2226	0.2026	0.1743	0.1702	0.1765	0.1698	0.1606
	4	0.1986	0.2224	0.202	0.1742	0.1701	0.1763	0.1696	0.1604
	40083	0.1983	0.2219	0.2018	0.174	0.1699	0.1757	0.1688	0.1601
	40167	0.198	0.2216	0.2015	0.1739	0.1699	0.1754	0.1685	0.1595
	4025	0.1977	0.2212	0.2015	0.1736	0.1698	0.1749	0.1666	0.1591
	40333	0.1974	0.221	0.201	0.1736	0.1695	0.1749	0.1676	0.1589
	40417	0.1969	0.2207	0.2006	0.1737	0.1695	0.174	0.1673	0.1585
	4.05	0.1968	0.2206	0.2006	0.1733	0.1695	0.174	0.1672	0.1583
	40583	0.1965	0.2201	0.2003	0.1734	0.1693	0.1733	0.1667	0.158
	40667	0.1963	0.2198	0.2003	0.1734	0.1691	0.1731	0.1661	0.1575
	4075	0.1958	0.2195	0.2	0.1733	0.1693	0.173	0.1655	0.1574
	40833	0.1957	0.2192	0.1995	0.1731	0.169	0.1725	0.1655	0.1569
	40917	0.1954	0.219	0.1994	0.1731	0.1687	0.1719	0.165	0.1566
	4.1	0.1946	0.2184	0.1991	0.1728	0.1687	0.1717	0.1646	0.1563
	41083	0.1943	0.2178	0.1989	0.173	0.1685	0.1714	0.1643	0.1557
	41167	0.1942	0.2177	0.1986	0.1728	0.1685	0.1708	0.164	0.1556
	4125	0.1939	0.2174	0.1986	0.1725	0.1682	0.1707	0.1633	0.1551
	41333	0.1937	0.2174	0.1983	0.1724	0.1682	0.1705	0.163	0.1551
	41417	0.1934	0.2171	0.198	0.1725	0.1681	0.1701	0.1623	0.1547
	4.15	0.1936	0.2166	0.1978	0.1724	0.1681	0.1696	0.162	0.1545
	41583	0.1928	0.2164	0.1977	0.172	0.1678	0.1695	0.1615	0.154
	41667	-0.124	0.2158	0.1972	0.1719	0.1678	0.1691	0.1617	0.1537
	41667	-0.1167	0.216	0.1971	-0.1054	-0.1176	-0.057	-0.053	-0.062
	4175	-0.1078	0.2157	0.1968	-0.1167	-0.1197	-0.0768	-0.0942	-0.0993
	41833	-0.1035	0.2152	-0.0912	-0.1069	-0.1157	-0.0741	-0.0941	-0.0974
	41917	-0.1022	-0.1438	-0.1069	-0.1031	-0.1179	-0.0716	-0.0903	-0.0924
	4.2	-0.1031	-0.1186	-0.0953	-0.1037	-0.125	-0.0694	-0.086	-0.0871
	42083	-0.1052	-0.1141	-0.0883	-0.1077	-0.1316	-0.0675	-0.0814	-0.0822
	42167	-0.1086	-0.1153	-0.084	-0.1148	-0.1342	-0.066	-0.0784	-0.0791
	4225	-0.1148	-0.1189	-0.0816	-0.1211	-0.1322	-0.0648	-0.0758	-0.0771
	42333	-0.1223	-0.1246	-0.0802	-0.125	-0.127	-0.0639	-0.0742	-0.0759
	42417	-0.1298	-0.1296	-0.0793	-0.1263	-0.1214	-0.0628	-0.0742	-0.0758
	4.25	-0.1365	-0.1331	-0.0794	-0.1246	-0.1156	-0.0623	-0.0739	-0.0764
	42583	-0.1403	-0.1348	-0.0793	-0.1217	-0.1109	-0.062	-0.0745	-0.0779
	42667	-0.1431	-0.136	-0.0793	-0.1173	-0.1058	-0.0614	-0.0756	-0.08
	4275	-0.144	-0.1363	-0.0794	-0.1131	-0.102	-0.0611	-0.0771	-0.0829
	42833	-0.1455	-0.1354	-0.0799	-0.1093	-0.0991	-0.0614	-0.079	-0.0855
	42917	-0.1455	-0.1336	-0.0797	-0.106	-0.0965	-0.0611	-0.0805	-0.0881
	4.3	-0.1449	-0.1313	-0.0799	-0.1032	-0.0944	-0.0611	-0.082	-0.0904
	43083	-0.1438	-0.1284	-0.0803	-0.1006	-0.0924	-0.0613	-0.0831	-0.0925
	43167	-0.1426	-0.126	-0.0808	-0.0983	-0.0909	-0.0617	-0.0845	-0.0936
	4325	-0.1405	-0.1235	-0.0808	-0.0961	-0.0895	-0.0623	-0.0855	-0.095
	43333	-0.1395	-0.1211	-0.0808	-0.0945	-0.0877	-0.0634	-0.0869	-0.0959
	43417	-0.1382	-0.1186	-0.0811	-0.0935	-0.0869	-0.0648	-0.0884	-0.0967
	4.35	-0.1371	-0.1165	-0.0813	-0.0922	-0.086	-0.0657	-0.0901	-0.098
	43583	-0.136	-0.1145	-0.0816	-0.0913	-0.0852	-0.0672	-0.0918	-0.0991
	43667	-0.1354	-0.1131	-0.0823	-0.0903	-0.0843	-0.0684	-0.0933	-0.1
	4375	-0.1348	-0.1112	-0.0828	-0.0896	-0.0838	-0.0697	-0.0948	-0.1014
	43833	-0.1341	-0.1099	-0.0835	-0.0886	-0.0831	-0.071	-0.0958	-0.1029
	43917	-0.1336	-0.1089	-0.0843	-0.0881	-0.0826	-0.0724	-0.0967	-0.1051
	4.4	-0.1333	-0.108	-0.0849	-0.0877	-0.0822	-0.0736	-0.0976	-0.1066
	44083	-0.1333	-0.1073	-0.0864	-0.0874	-0.0817	-0.0747	-0.0983	-0.1092
	44167	-0.1337	-0.1066	-0.0877	-0.0867	-0.0813	-0.0758	-0.0993	-0.1121
	4425	-0.1337	-0.1063	-0.0892	-0.0866	-0.0811	-0.0764	-0.1	-0.1151
	44333	-0.1342	-0.1058	-0.0907	-0.0864	-0.0809	-0.0773	-0.1009	-0.1188
	44417	-0.1348	-0.106	-0.0927	-0.0864	-0.0805	-0.0777	-0.1019	-0.1229
	4.45	-0.1357	-0.1057	-0.0948	-0.0864	-0.0805	-0.0785	-0.1031	-0.1278
	44583	-0.1373	-0.106	-0.0979	-0.0866	-0.0803	-0.0793	-0.1046	-0.133
	44667	-0.1389	-0.106	-0.1005	-0.086	-0.0803	-0.0805	-0.1063	-0.138
	4475	-0.1412	-0.1064	-0.1037	-0.0866	-0.0803	-0.0814	-0.1084	-0.1435
	44833	-0.1434	-0.1067	-0.1084	-0.0866	-0.0805	-0.0819	-0.1104	-0.1484
	44917	-0.1456	-0.1069	-0.113	-0.0867	-0.0806	-0.0828	-0.113	-0.1537
	4.5	-0.1487	-0.1072	-0.1189	-0.0871	-0.0808	-0.0837	-0.1159	-0.158
	45083	-0.1513	-0.1075	-0.1254	-0.0877	-0.0809	-0.0846	-0.1189	-0.1609
	45167	-0.1542	-0.1086	-0.1337	-0.0878	-0.0811	-0.0861	-0.1221	-0.1638
	4525	-0.1566	-0.1092	-0.1418	-0.0884	-0.0814	-0.0869	-0.1258	-0.1662
	45333	-0.1592	-0.1102	-0.1504	-0.089	-0.0817	-0.0883	-0.1296	-0.1685
	45417	-0.1615	-0.1116	-0.16	-0.0896	-0.0822	-0.0901	-0.1334	-0.1699
	4.55	-0.1647	-0.1131	-0.1673	-0.0904	-0.0826	-0.0922	-0.1373	-0.1716
	45583	-0.167	-0.1153	-0.1737	-0.0913	-0.0834	-0.0951	-0.1409	-0.1736
	45667	-0.1685	-0.117	-0.1772	-0.0925	-0.0842	-0.0979	-0.1449	-0.1748
	4575	-0.1695	-0.1196	-0.181	-0.0938	-0.0848	-0.1012	-0.1492	-0.1757
	45833	-0.1708	-0.122	-0.1835	-0.0951	-0.0857	-0.1052	-0.153	-0.1771
	45917	-0.1719	-0.1249	-0.1853	-0.0965	-0.0864	-0.1101	-0.1566	-0.178
	4.6	-0.172	-0.1281	-0.1859	-0.0985	-0.0874	-0.1154	-0.1603	-0.1789
	46083	-0.1728	-0.1315	-0.1864	-0.1005	-0.0886	-0.1208	-0.1632	-0.1795
	46167	-0.173	-0.135	-0.1865	-0.1032	-0.09	-0.1264	-0.1655	-0.1801
	4625	-0.1733	-0.1391	-0.187	-0.106	-0.0915	-0.133	-0.1675	-0.18
	46333	-0.1736	-0.1426	-0.187	-0.1093	-0.0933	-0.1402	-0.1691	-0.18
	46417	-0.1736	-0.146	-0.1867	-0.113	-0.0948	-0.1469	-0.1701	-0.1797
	4.65	-0.1737	-0.1495	-0.1867	-0.117	-0.0971	-0.1537	-0.1711	-0.1795
	46583	-0.1733	-0.1518	-0.1865	-0.1211	-0.0993	-0.1598	-0.172	-0.1792
	46667	-0.1733	-0.1543	-0.1865	-0.1254	-0.1019	-0.1652	-0.1733	-0.1789
	4675	-0.1728	-0.1566	-0.1856	-0.1281	-0.1049	-0.1699	-0.1743	-0.1783
	46833	-0.1725	-0.1582	-0.1858	-0.1312	-0.1083	-0.1749	-0.1754	-0.178
	46917	-0.1719	-0.1594	-0.1858	-0.1333	-0.1118	-0.1788	-0.1762	-0.1771
	4.7	-0.1717	-0.1594	-0.1858	-0.1339	-0.1153	-0.182	-0.1771	-0.1766
	47083	-0.1716	-0.1592	-0.1856	-0.1347	-0.118	-0.1841	-0.1777	-0.1757
	47167	-0.1714	-0.1586	-0.1856	-0.135	-0.1209	-0.1861	-0.1781	-0.1757
	4725	-0.171	-0.1591	-0.1852	-0.1348	-0.1231	-0.1872	-0.1785	-0.1751
	47333	-0.1708	-0.1589	-0.1855	-0.1348	-0.1244	-0.1876	-0.1783	-0.1746
	47417	-0.1705	-0.1586	-0.185	-0.135	-0.1252	-0.1882	-0.1783	-0.174
	4.75	-0.1702	-0.1583	-0.185	-0.1351	-0.1257	-0.1884	-0.1781	-0.1737
	47583	-0.1699	-0.1586	-0.185	-0.1354	-0.1258	-0.1875	-0.1781	-0.1733
	47667	-0.1696	-0.1582	-0.1849	-0.1354	-0.126	-0.187	-0.1775	-0.1728
	4775	-0.1696	-0.1589	-0.1847	-0.1354	-0.1258	-0.1861	-0.1772	-0.1724
	47833	-0.1693	-0.1588	-0.1847	-0.1354	-0.126	-0.1852	-0.1769	-0.1719
	47917	-0.1687	-0.1588	-0.1844	-0.1354	-0.1257	-0.1846	-0.1762	-0.1714
	4.8	-0.1685	-0.1591	-0.1844	-0.1353	-0.1258	-0.1835	-0.176	-0.171
	48083	-0.1685	-0.1585	-0.1844	-0.1354	-0.1258	-0.1829	-0.1746	-0.1702
	48167	-0.1681	-0.1583	-0.1844	-0.1356	-0.1255	-0.1821	-0.1743	-0.1699
	4825	-0.1679	-0.1583	-0.1843	-0.1354	-0.1257	-0.1812	-0.1736	-0.1696
	48333	-0.1678	-0.158	-0.1843	-0.1356	-0.1255	-0.1804	-0.173	-0.1693
	48417	-0.1676	-0.1579	-0.1844	-0.1357	-0.1254	-0.1795	-0.1727	-0.1687
	4.85	-0.1673	-0.1577	-0.1841	-0.1362	-0.1254	-0.1791	-0.1717	-0.1684
	48583	-0.1672	-0.1575	-0.1839	-0.1359	-0.1257	-0.1788	-0.1713	-0.1681
	48667	-0.1667	-0.1574	-0.1838	-0.1359	-0.1257	-0.1778	-0.171	-0.1676
	4875	-0.1664	-0.1571	-0.1841	-0.1359	-0.1257	-0.1769	-0.1704	-0.1669
	48833	-0.1662	-0.1568	-0.1839	-0.136	-0.1255	-0.1763	-0.1701	-0.1669
	48917	-0.1661	-0.1568	-0.1839	-0.1359	-0.1257	-0.1757	-0.1699	-0.1655
	4.9	-0.1659	-0.1566	-0.1836	-0.1359	-0.1257	-0.1754	-0.1693	-0.1653
	49083	-0.1656	-0.1565	-0.1838	-0.136	-0.1255	-0.1748	-0.1688	-0.1652
	49167	-0.1653	-0.1562	-0.1838	-0.1363	-0.1257	-0.174	-0.1684	-0.165
	4925	-0.165	-0.1559	-0.1838	-0.1363	-0.1255	-0.1737	-0.1679	-0.1644
	49333	-0.1647	-0.1559	-0.1838	-0.1362	-0.1257	-0.1731	-0.1673	-0.1649
	49417	-0.1647	-0.1557	-0.1836	-0.1362	-0.1258	-0.1725	-0.1669	-0.1644
	4.95	-0.1644	-0.1557	-0.1836	-0.1363	-0.1255	-0.172	-0.1664	-0.1643
	49583	-0.1643	-0.1556	-0.1836	-0.1363	-0.1258	-0.1717	-0.1659	-0.1638
	49667	-0.164	-0.1553	-0.1835	-0.1365	-0.1258	-0.1713	-0.1653	-0.1633
	4975	-0.1638	-0.155	-0.1833	-0.1363	-0.1257	-0.171	-0.165	-0.1629
	49833	-0.1633	-0.1551	-0.1832	-0.1366	-0.1258	-0.1701	-0.1646	-0.1624
	49917	-0.1633	-0.155	-0.1835	-0.1366	-0.1258	-0.1698	-0.1641	-0.162
	5	-0.1633	-0.155	-0.1833	-0.1366	-0.126	-0.1693	-0.1637	-0.1618
	50083	-0.1629	-0.1547	-0.1832	-0.1368	-0.126	-0.1685	-0.163	-0.1612
	50167	-0.1627	-0.1547	-0.1833	-0.1369	-0.1263	-0.1684	-0.1629	-0.1609
	5025	-0.1626	-0.1543	-0.1832	-0.1371	-0.1261	-0.1679	-0.1621	-0.1608
	50333	-0.1623	-0.1543	-0.1829	-0.1369	-0.1261	-0.1676	-0.1617	-0.1606
	50417	-0.162	-0.154	-0.1827	-0.1369	-0.1263	-0.167	-0.1614	-0.1604
	5.05	-0.1617	-0.1539	-0.183	-0.1371	-0.1261	-0.1666	-0.1609	-0.1604
	50583	-0.1615	-0.154	-0.1826	-0.1373	-0.1263	-0.1662	-0.1604	-0.1598
	50667	-0.1611	-0.1539	-0.1826	-0.1371	-0.1264	-0.1661	-0.1603	-0.1595
	5075	-0.1612	-0.1537	-0.1827	-0.1373	-0.1267	-0.1653	-0.1595	-0.1595
	50833	-0.1609	-0.1537	-0.1826	-0.1374	-0.1267	-0.1652	-0.1595	-0.1591
	50917	-0.1608	-0.1536	-0.1824	-0.1374	-0.1267	-0.1646	-0.1592	-0.1589
	5.1	-0.1604	-0.1536	-0.1827	-0.1374	-0.1267	-0.1643	-0.1589	-0.1586
	51083	-0.1604	-0.1533	-0.1824	-0.1377	-0.1267	-0.164	-0.1588	-0.1586
	51167	-0.1601	-0.1533	-0.1821	-0.1377	-0.1267	-0.1633	-0.158	-0.1582
	5125	-0.1597	-0.153	-0.1821	-0.1377	-0.1266	-0.1627	-0.1577	-0.1579
	51333	-0.1598	-0.1528	-0.1818	-0.138	-0.127	-0.1626	-0.1577	-0.1579
	51417	-0.1595	-0.1528	-0.1818	-0.1379	-0.1272	-0.1623	-0.1572	-0.1577
	5.15	-0.1595	-0.1522	-0.182	-0.1379	-0.1272	-0.1623	-0.1568	-0.1575
	51583	-0.1592	-0.1521	-0.182	-0.138	-0.1273	-0.1618	-0.1565	-0.1575
	51667	0.1002	-0.1521	-0.1818	-0.1382	-0.1273	-0.1614	-0.1563	-0.1572
	51667	0.118	-0.1519	-0.182	0.0886	0.0811	0.0578	0.0546	0.0568
	5175	0.1119	-0.1516	-0.1817	0.1116	0.0954	0.088	0.0929	0.0945
	51833	0.1096	-0.1514	0.1083	0.1057	0.0945	0.0877	0.095	0.097
	51917	0.1104	0.1044	0.1133	0.1009	0.0959	0.086	0.0929	0.095
	5.2	0.1133	0.1208	0.1028	0.098	0.0983	0.0831	0.089	0.0913
	52083	0.117	0.1159	0.0967	0.0977	0.102	0.0803	0.0848	0.0872
	52167	0.1208	0.1139	0.0938	0.0999	0.1058	0.078	0.0813	0.0845
	5225	0.1238	0.1157	0.0929	0.1041	0.1099	0.0761	0.0784	0.0823
	52333	0.1258	0.1211	0.0933	0.1083	0.113	0.075	0.0764	0.0811
	52417	0.1267	0.127	0.0935	0.1101	0.1156	0.0738	0.0753	0.0814
	5.25	0.126	0.1318	0.0942	0.1095	0.1153	0.073	0.0748	0.0822
	52583	0.1249	0.1342	0.0941	0.1067	0.1135	0.0726	0.075	0.0848
	52667	0.1241	0.1348	0.0942	0.1037	0.1101	0.0729	0.0755	0.0877
	5275	0.1234	0.1347	0.0936	0.1	0.1061	0.0738	0.0759	0.0907
	52833	0.1217	0.1327	0.0932	0.0974	0.1025	0.0756	0.0767	0.0933
	52917	0.1211	0.1307	0.093	0.0947	0.0994	0.0779	0.0776	0.0962
	5.3	0.1199	0.1302	0.0924	0.0929	0.0965	0.0808	0.0787	0.0982
	53083	0.1189	0.1283	0.0918	0.0909	0.0941	0.0848	0.0796	0.0996
	53167	0.1188	0.1261	0.0913	0.089	0.0922	0.0887	0.0806	0.1008
	5325	0.1182	0.1238	0.091	0.0878	0.0906	0.0913	0.082	0.1019
	53333	0.1176	0.122	0.0907	0.0866	0.0889	0.0936	0.0831	0.1028
	53417	0.117	0.1202	0.0906	0.0858	0.0875	0.0956	0.0845	0.1032
	5.35	0.1165	0.1189	0.0904	0.0849	0.0866	0.0968	0.086	0.1043
	53583	0.116	0.1176	0.0904	0.0843	0.0855	0.0982	0.0877	0.1051
	53667	0.1156	0.116	0.0901	0.0837	0.0848	0.0993	0.0892	0.1058
	5375	0.1151	0.115	0.0904	0.0834	0.0843	0.0999	0.0906	0.1067
	53833	0.115	0.1141	0.0907	0.0832	0.0835	0.1011	0.0922	0.1078
	53917	0.1147	0.1133	0.0913	0.0828	0.0831	0.102	0.0939	0.1087
	5.4	0.1141	0.1122	0.0918	0.0826	0.0829	0.1035	0.0958	0.1098
	54083	0.1141	0.1121	0.0922	0.0823	0.0828	0.1048	0.097	0.1109
	54167	0.1139	0.1116	0.0932	0.0823	0.0823	0.1061	0.098	0.1122
	5425	0.1141	0.111	0.0939	0.0825	0.0822	0.1073	0.0993	0.1138
	54333	0.1141	0.1106	0.0953	0.0823	0.0822	0.109	0.1002	0.1156
	54417	0.1144	0.1104	0.0964	0.0825	0.082	0.1112	0.1014	0.1171
	5.45	0.1148	0.1101	0.098	0.0826	0.082	0.1135	0.1022	0.1194
	54583	0.1156	0.1099	0.0997	0.0829	0.0822	0.1162	0.1032	0.1218
	54667	0.1165	0.1102	0.1019	0.0831	0.0825	0.1194	0.1044	0.124
	5475	0.1171	0.1102	0.1041	0.0834	0.0823	0.1232	0.1058	0.1263
	54833	0.1177	0.1109	0.1067	0.0835	0.0828	0.1275	0.107	0.1284
	54917	0.1192	0.1113	0.1098	0.0838	0.0829	0.1322	0.1087	0.1307
	5.5	0.1202	0.1115	0.1133	0.0843	0.0832	0.1382	0.1104	0.1331
	55083	0.1218	0.1122	0.1174	0.0849	0.084	0.1435	0.1125	0.1356
	55167	0.1231	0.1125	0.122	0.0852	0.0843	0.149	0.1145	0.1379
	5525	0.1254	0.113	0.1273	0.086	0.0846	0.1542	0.117	0.14
	55333	0.1273	0.1138	0.1328	0.0867	0.0854	0.1586	0.1192	0.1424
	55417	0.1298	0.1148	0.1391	0.0878	0.0861	0.1635	0.1218	0.1446
	5.55	0.1325	0.1159	0.1456	0.0886	0.0869	0.1669	0.1243	0.147
	55583	0.135	0.117	0.1524	0.0898	0.0875	0.1701	0.127	0.1496
	55667	0.138	0.1183	0.1588	0.091	0.0884	0.1717	0.1301	0.1524
	5575	0.1414	0.1202	0.1638	0.0924	0.0896	0.1734	0.1331	0.1557
	55833	0.1447	0.1218	0.1675	0.0939	0.091	0.1749	0.136	0.1588
	55917	0.1475	0.1237	0.1698	0.0954	0.0921	0.1762	0.1391	0.1621
	5.6	0.1507	0.126	0.1705	0.0974	0.0941	0.1774	0.142	0.1652
	56083	0.1528	0.1283	0.1708	0.0997	0.0958	0.1786	0.1446	0.1675
	56167	0.1547	0.1304	0.1707	0.1019	0.098	0.18	0.147	0.1693
	5625	0.1559	0.1327	0.1707	0.1046	0.1005	0.1804	0.1495	0.1704
	56333	0.1569	0.1357	0.1707	0.1078	0.1031	0.1815	0.1511	0.1711
	56417	0.1582	0.1383	0.1705	0.1112	0.1066	0.182	0.1531	0.1714
	5.65	0.1589	0.1414	0.1704	0.1147	0.1096	0.1824	0.155	0.1713
	56583	0.1594	0.1435	0.1704	0.1185	0.1131	0.1827	0.1566	0.1711
	56667	0.1598	0.1458	0.1702	0.1221	0.117	0.1826	0.158	0.1707
	5675	0.16	0.1479	0.1704	0.1258	0.1212	0.182	0.1598	0.1702
	56833	0.16	0.1495	0.1701	0.1292	0.1255	0.1807	0.1609	0.1698
	56917	0.1597	0.151	0.1699	0.1316	0.1283	0.1804	0.162	0.1688
	5.7	0.1595	0.1521	0.1701	0.1339	0.1312	0.1801	0.163	0.1682
	57083	0.1594	0.153	0.1699	0.1356	0.1331	0.1795	0.1643	0.1681
	57167	0.1591	0.1534	0.1698	0.1369	0.1341	0.1788	0.165	0.1673
	5725	0.1588	0.1542	0.1696	0.1377	0.1347	0.1788	0.1655	0.167
	57333	0.1585	0.154	0.1698	0.138	0.135	0.178	0.1649	0.1666
	57417	0.1583	0.1542	0.1698	0.1383	0.135	0.1774	0.1647	0.1659
	5.75	0.158	0.154	0.1696	0.1386	0.1351	0.1769	0.1655	0.1655
	57583	0.1579	0.1539	0.1693	0.1386	0.1351	0.1763	0.1673	0.1647
	57667	0.1579	0.1536	0.1695	0.1389	0.1348	0.1757	0.1673	0.1641
	5775	0.1575	0.1536	0.1691	0.1388	0.1348	0.1754	0.1673	0.1638
	57833	0.1572	0.1536	0.1693	0.1388	0.1348	0.1749	0.1675	0.1633
	57917	0.1569	0.153	0.1691	0.1388	0.1348	0.1748	0.1675	0.1629
	5.8	0.1568	0.153	0.169	0.1386	0.1347	0.1742	0.1675	0.1623
	58083	0.1565	0.1528	0.169	0.1388	0.1347	0.1742	0.167	0.1618
	58167	0.1562	0.1525	0.169	0.1388	0.1345	0.1734	0.167	0.1614
	5825	0.156	0.1527	0.169	0.1389	0.1345	0.173	0.1667	0.1611
	58333	0.1557	0.1525	0.1685	0.1389	0.1345	0.1725	0.1664	0.1604
	58417	0.1556	0.1522	0.1687	0.1389	0.1345	0.1722	0.1662	0.1598
	5.85	0.1556	0.1522	0.1687	0.1392	0.1342	0.172	0.1659	0.1597
	58583	0.1553	0.1519	0.1685	0.1391	0.1345	0.1713	0.1652	0.1591
	58667	0.1553	0.1518	0.1685	0.1391	0.1347	0.1707	0.1649	0.1586
	5875	0.155	0.1516	0.1685	0.1391	0.135	0.1705	0.1644	0.1583
	58833	0.1547	0.1516	0.1687	0.1392	0.1347	0.1701	0.1637	0.1582
	58917	0.1547	0.1513	0.1687	0.1395	0.1348	0.1698	0.1633	0.1577
	5.9	0.1543	0.1511	0.1684	0.1395	0.1347	0.1691	0.1629	0.1572
	59083	0.1543	0.1511	0.1684	0.1394	0.1347	0.1691	0.1623	0.1571
	59167	0.1542	0.151	0.1685	0.1394	0.1347	0.1687	0.162	0.1566
	5925	0.1539	0.151	0.1682	0.1397	0.1348	0.1684	0.1618	0.156
	59333	0.1539	0.1508	0.1682	0.1395	0.1348	0.1681	0.1614	0.1554
	59417	0.1533	0.1505	0.1682	0.1398	0.1348	0.1675	0.1606	0.1553
	5.95	0.1531	0.1502	0.1681	0.14	0.135	0.1672	0.1603	0.155
	59583	0.1531	0.1504	0.1682	0.1398	0.1347	0.167	0.16	0.1547
	59667	0.1528	0.1501	0.1681	0.1398	0.135	0.1664	0.16	0.1542
	5975	0.1528	0.1507	0.1681	0.14	0.1347	0.1655	0.1595	0.1539
	59833	0.1527	0.1505	0.1681	0.1402	0.135	0.1655	0.1592	0.1533
	59917	0.1525	0.1501	0.1681	0.1402	0.1351	0.1653	0.1588	0.1531
	6	0.1524	0.1501	0.1676	0.1402	0.1348	0.1652	0.1583	0.153
	60083	0.1522	0.1502	0.1679	0.1403	0.1353	0.165	0.1582	0.1522
	60167	0.1519	0.1499	0.1678	0.1402	0.1351	0.1649	0.1577	0.1519
	6025	0.1519	0.1499	0.1678	0.1406	0.1351	0.1647	0.1575	0.1516
	60333	0.1514	0.1498	0.1676	0.1406	0.1351	0.1644	0.1571	0.1511
	60417	0.1516	0.1496	0.1676	0.1405	0.1351	0.1638	0.1568	0.151
	6.05	0.1513	0.1496	0.1675	0.1406	0.1353	0.1633	0.1563	0.1507
	60583	0.1513	0.1496	0.1675	0.1406	0.1353	0.1635	0.156	0.1502
	60667	0.1508	0.1493	0.1672	0.1409	0.1351	0.1633	0.1559	0.1502
	6075	0.1508	0.1492	0.1673	0.1408	0.1353	0.163	0.1554	0.1498
	60833	0.1507	0.1492	0.1676	0.1412	0.1351	0.1624	0.155	0.1492
	60917	0.1505	0.1489	0.1672	0.1411	0.1353	0.1624	0.1548	0.1489
	6.1	0.1505	0.1489	0.167	0.1411	0.1353	0.162	0.1543	0.1487
	61083	0.1502	0.1487	0.167	0.1412	0.1353	0.162	0.1534	0.1482
	61167	0.1501	0.1489	0.1672	0.1414	0.1353	0.162	0.1534	0.1481
	6125	0.1499	0.1485	0.1669	0.1412	0.1354	0.1617	0.1531	0.1478
	61333	0.1499	0.1484	0.167	0.1415	0.1353	0.1615	0.153	0.1476
	61417	0.1498	0.1482	0.167	0.1417	0.1354	0.1612	0.1527	0.147
	6.15	0.1496	0.1485	0.1667	0.1415	0.1354	0.1609	0.1524	0.1467
	61583	0.1496	0.1482	0.1667	0.1415	0.1353	0.1606	0.1519	0.1464
	61667	-0.0948	0.1481	0.1666	0.1415	0.1353	0.1603	0.1518	0.1463
	61667	-0.1136	0.1479	0.1666	-0.0884	-0.0886	-0.0478	-0.0437	-0.055
	6175	-0.1054	0.1479	0.1664	-0.1099	-0.1109	-0.0665	-0.0808	-0.0903
	61833	-0.1012	0.1476	-0.0829	-0.1048	-0.1102	-0.0661	-0.0813	-0.0912
	61917	-0.0983	-0.102	-0.1043	-0.1009	-0.1116	-0.0657	-0.08	-0.0889
	6.2	-0.0967	-0.1141	-0.0967	-0.0994	-0.1144	-0.0655	-0.0782	-0.0857
	62083	-0.0958	-0.1081	-0.0918	-0.1003	-0.117	-0.0652	-0.0764	-0.0826
	62167	-0.0959	-0.1052	-0.0883	-0.1035	-0.1179	-0.0651	-0.075	-0.0805
	6225	-0.0967	-0.1035	-0.0867	-0.1086	-0.1171	-0.0648	-0.0738	-0.0785
	62333	-0.0983	-0.1034	-0.0864	-0.1121	-0.1147	-0.0646	-0.0727	-0.0776
	62417	-0.0999	-0.1041	-0.0867	-0.1138	-0.1109	-0.0649	-0.0719	-0.0774
	6.25	-0.1011	-0.1052	-0.0869	-0.113	-0.1067	-0.0648	-0.0716	-0.0782
	62583	-0.1029	-0.1063	-0.0871	-0.1109	-0.1023	-0.0648	-0.0721	-0.0793
	62667	-0.1048	-0.1066	-0.0869	-0.1073	-0.0988	-0.0651	-0.0726	-0.0816
	6275	-0.1058	-0.1063	-0.086	-0.1048	-0.0959	-0.0652	-0.0736	-0.0843
	62833	-0.107	-0.1052	-0.0854	-0.1015	-0.093	-0.0655	-0.0753	-0.0866
	62917	-0.107	-0.1038	-0.0849	-0.0985	-0.0907	-0.0661	-0.0768	-0.089
	6.3	-0.1075	-0.1023	-0.0843	-0.0961	-0.0886	-0.0669	-0.0787	-0.0907
	63083	-0.1073	-0.1008	-0.0838	-0.0944	-0.0872	-0.068	-0.0808	-0.0924
	63167	-0.1072	-0.0991	-0.0831	-0.0925	-0.0858	-0.0692	-0.0829	-0.0933
	6325	-0.1078	-0.0977	-0.0822	-0.0907	-0.0846	-0.0706	-0.0846	-0.0939
	63333	-0.1073	-0.0965	-0.0817	-0.0896	-0.0835	-0.0718	-0.0861	-0.095
	63417	-0.107	-0.0956	-0.0817	-0.0886	-0.0826	-0.0729	-0.0878	-0.0956
	6.35	-0.1066	-0.0945	-0.0813	-0.0877	-0.0819	-0.0744	-0.0895	-0.0964
	63583	-0.1064	-0.0935	-0.0811	-0.0871	-0.0814	-0.0758	-0.091	-0.0971
	63667	-0.1063	-0.0929	-0.0809	-0.0861	-0.0808	-0.0768	-0.0922	-0.0982
	6375	-0.1061	-0.0922	-0.0806	-0.0857	-0.0803	-0.0777	-0.0927	-0.099
	63833	-0.1054	-0.0915	-0.0809	-0.0852	-0.0797	-0.0793	-0.0933	-0.0999
	63917	-0.1052	-0.091	-0.0809	-0.0849	-0.0793	-0.08	-0.0941	-0.1005
	6.4	-0.1049	-0.0906	-0.0811	-0.0846	-0.0791	-0.0806	-0.0947	-0.1017
	64083	-0.1048	-0.0906	-0.0814	-0.0842	-0.0788	-0.0816	-0.0951	-0.1028
	64167	-0.1046	-0.0901	-0.0817	-0.0842	-0.079	-0.0823	-0.0959	-0.1041
	6425	-0.1041	-0.09	-0.0822	-0.0835	-0.0785	-0.0826	-0.0965	-0.1054
	64333	-0.1041	-0.0896	-0.0825	-0.0835	-0.0785	-0.0832	-0.0971	-0.1069
	64417	-0.104	-0.0896	-0.0832	-0.0835	-0.0785	-0.0842	-0.0979	-0.109
	6.45	-0.1038	-0.0895	-0.0837	-0.0834	-0.0785	-0.0848	-0.0988	-0.1104
	64583	-0.1037	-0.0895	-0.0843	-0.0837	-0.0785	-0.0855	-0.0994	-0.1125
	64667	-0.1038	-0.09	-0.0851	-0.084	-0.0787	-0.0863	-0.1003	-0.1153
	6475	-0.1035	-0.0898	-0.0858	-0.084	-0.079	-0.0869	-0.1015	-0.118
	64833	-0.1038	-0.0898	-0.0869	-0.0845	-0.079	-0.0878	-0.1025	-0.1211
	64917	-0.104	-0.0903	-0.088	-0.0846	-0.0791	-0.0887	-0.1038	-0.1249
	6.5	-0.1041	-0.0903	-0.0893	-0.0849	-0.0793	-0.0896	-0.1049	-0.1286
	65083	-0.1044	-0.0904	-0.0912	-0.0854	-0.0799	-0.091	-0.1063	-0.1324
	65167	-0.1046	-0.0906	-0.0925	-0.0858	-0.08	-0.0924	-0.1083	-0.1365
	6525	-0.1048	-0.0912	-0.0947	-0.0864	-0.0808	-0.0941	-0.1095	-0.1397
	65333	-0.1051	-0.0915	-0.0968	-0.0871	-0.0811	-0.0965	-0.1115	-0.1429
	65417	-0.1052	-0.0916	-0.0997	-0.0878	-0.0817	-0.1	-0.1128	-0.1456
	6.55	-0.1061	-0.0919	-0.1026	-0.0884	-0.0822	-0.1035	-0.115	-0.1481
	65583	-0.1067	-0.0925	-0.1055	-0.0893	-0.0831	-0.1072	-0.1167	-0.1502
	65667	-0.1073	-0.0927	-0.1095	-0.0901	-0.0835	-0.1104	-0.1185	-0.1522
	6575	-0.1081	-0.0932	-0.1133	-0.091	-0.0846	-0.1133	-0.1206	-0.1537
	65833	-0.1092	-0.0938	-0.1176	-0.0924	-0.0855	-0.1165	-0.1232	-0.1556
	65917	-0.1101	-0.0944	-0.1221	-0.0938	-0.0864	-0.1194	-0.1263	-0.1574
	6.6	-0.111	-0.095	-0.1269	-0.095	-0.0874	-0.1223	-0.1292	-0.1588
	66083	-0.1122	-0.0959	-0.1313	-0.0968	-0.0887	-0.1254	-0.1321	-0.1608
	66167	-0.1136	-0.0967	-0.1357	-0.0986	-0.09	-0.1283	-0.1344	-0.1621
	6625	-0.1151	-0.0974	-0.1395	-0.1005	-0.0913	-0.1321	-0.1365	-0.1637
	66333	-0.1167	-0.0985	-0.1431	-0.1026	-0.0929	-0.1357	-0.1385	-0.1652
	66417	-0.118	-0.0996	-0.1461	-0.1051	-0.0945	-0.1394	-0.1405	-0.1661
	6.65	-0.1196	-0.1005	-0.1476	-0.1069	-0.0961	-0.1432	-0.142	-0.1675
	66583	-0.1211	-0.1019	-0.1498	-0.1089	-0.0976	-0.1464	-0.1432	-0.1685
	66667	-0.1226	-0.1029	-0.1516	-0.1106	-0.0993	-0.1504	-0.1443	-0.1695
	6675	-0.1241	-0.1043	-0.1525	-0.1121	-0.1006	-0.1537	-0.1453	-0.1699
	66833	-0.1252	-0.1057	-0.1531	-0.113	-0.102	-0.1568	-0.1466	-0.1705
	66917	-0.1264	-0.1072	-0.1536	-0.1138	-0.1026	-0.1601	-0.1475	-0.1707
	6.7	-0.1278	-0.109	-0.1537	-0.1138	-0.1035	-0.163	-0.1489	-0.171
	67083	-0.1281	-0.111	-0.1539	-0.1136	-0.1037	-0.1661	-0.1499	-0.1707
	67167	-0.1287	-0.1125	-0.1545	-0.1136	-0.1035	-0.1681	-0.151	-0.1707
	6725	-0.129	-0.1141	-0.1537	-0.1135	-0.1037	-0.1704	-0.1518	-0.1705
	67333	-0.1292	-0.1154	-0.1537	-0.1135	-0.1037	-0.1713	-0.1527	-0.1702
	67417	-0.1292	-0.1168	-0.1536	-0.1135	-0.1034	-0.1733	-0.1534	-0.1696
	6.75	-0.1293	-0.118	-0.1545	-0.1135	-0.1037	-0.1745	-0.1542	-0.1695
	67583	-0.1289	-0.1192	-0.1543	-0.1135	-0.1034	-0.1752	-0.1551	-0.169
	67667	-0.1289	-0.1203	-0.1545	-0.1131	-0.1029	-0.1756	-0.1559	-0.1685
	6775	-0.1289	-0.1206	-0.154	-0.1131	-0.1029	-0.1756	-0.1568	-0.1684
	67833	-0.1286	-0.1212	-0.1537	-0.1131	-0.1029	-0.1754	-0.1575	-0.1679
	67917	-0.1283	-0.1212	-0.1542	-0.113	-0.1026	-0.1748	-0.1585	-0.1675
	6.8	-0.1283	-0.1212	-0.1543	-0.1131	-0.1026	-0.1745	-0.1589	-0.1662
	68083	-0.1279	-0.1212	-0.1542	-0.113	-0.1026	-0.174	-0.1594	-0.1662
	68167	-0.1278	-0.1212	-0.1542	-0.1128	-0.1023	-0.174	-0.1597	-0.1659
	6825	-0.1276	-0.1212	-0.154	-0.1131	-0.1023	-0.1736	-0.1594	-0.1658
	68333	-0.1276	-0.1209	-0.1543	-0.113	-0.1019	-0.173	-0.16	-0.1656
	68417	-0.1275	-0.1209	-0.1542	-0.1127	-0.1019	-0.1727	-0.16	-0.1655
	6.85	-0.127	-0.1206	-0.1543	-0.1128	-0.1019	-0.1717	-0.16	-0.165
	68583	-0.1272	-0.1208	-0.1545	-0.1127	-0.1019	-0.1714	-0.1603	-0.1646
	68667	-0.1269	-0.1203	-0.1542	-0.1128	-0.1019	-0.171	-0.1603	-0.1644
	6875	-0.1267	-0.1202	-0.1542	-0.1128	-0.1015	-0.1702	-0.1598	-0.1641
	68833	-0.1267	-0.1202	-0.1542	-0.1128	-0.1017	-0.1698	-0.1595	-0.1635
	68917	-0.1264	-0.1205	-0.1542	-0.1128	-0.1014	-0.1698	-0.1592	-0.1632
	6.9	-0.1261	-0.1205	-0.1542	-0.1128	-0.1012	-0.1688	-0.1592	-0.1627
	69083	-0.1263	-0.1203	-0.1542	-0.1128	-0.1012	-0.1685	-0.1582	-0.1626
	69167	-0.126	-0.1205	-0.154	-0.113	-0.1012	-0.1681	-0.1579	-0.1623
	6925	-0.126	-0.1203	-0.154	-0.1128	-0.1014	-0.1676	-0.1579	-0.162
	69333	-0.1258	-0.1202	-0.1539	-0.113	-0.1011	-0.1672	-0.1572	-0.1609
	69417	-0.1258	-0.1199	-0.154	-0.1128	-0.1012	-0.1669	-0.1568	-0.1606
	6.95	-0.1258	-0.12	-0.1542	-0.113	-0.1012	-0.1664	-0.1565	-0.1606
	69583	-0.1255	-0.1199	-0.1543	-0.1128	-0.1012	-0.1659	-0.156	-0.1606
	69667	-0.1254	-0.1199	-0.154	-0.1128	-0.1012	-0.1652	-0.1557	-0.16
	6975	-0.1252	-0.12	-0.1543	-0.1125	-0.1009	-0.165	-0.1551	-0.1595
	69833	-0.1249	-0.12	-0.154	-0.1127	-0.1009	-0.1643	-0.1551	-0.1595
	69917	-0.1249	-0.1197	-0.1542	-0.1127	-0.1006	-0.1641	-0.1545	-0.1591
	7	-0.1249	-0.12	-0.1542	-0.1128	-0.1009	-0.1638	-0.1542	-0.1588
	70083	-0.1247	-0.1197	-0.154	-0.1127	-0.1008	-0.163	-0.1539	-0.1588
	70167	-0.1246	-0.1199	-0.154	-0.1128	-0.1008	-0.1629	-0.1537	-0.1588
	7025	-0.1244	-0.1197	-0.1542	-0.1127	-0.1009	-0.1624	-0.1534	-0.1585
	70333	-0.1243	-0.1197	-0.154	-0.1128	-0.1006	-0.1621	-0.1533	-0.1582
	70417	-0.1241	-0.1194	-0.1542	-0.1128	-0.1006	-0.162	-0.1527	-0.158
	7.05	-0.124	-0.1196	-0.1543	-0.1128	-0.1008	-0.1612	-0.1524	-0.1586
	70583	-0.124	-0.1197	-0.1542	-0.1127	-0.1008	-0.1614	-0.1521	-0.1583
	70667	-0.1238	-0.1196	-0.1542	-0.1128	-0.1008	-0.1604	-0.1513	-0.1582
	7075	-0.1238	-0.1196	-0.1543	-0.1127	-0.1006	-0.1601	-0.1511	-0.1565
	70833	-0.1235	-0.1197	-0.154	-0.1128	-0.1006	-0.1597	-0.1508	-0.1562
	70917	-0.1234	-0.1196	-0.1542	-0.1128	-0.1006	-0.1595	-0.1507	-0.1562
	7.1	-0.1234	-0.1197	-0.1543	-0.1133	-0.1006	-0.1594	-0.1504	-0.156
	71083	-0.1231	-0.1197	-0.1543	-0.1131	-0.1008	-0.1586	-0.1501	-0.1563
	71167	-0.1231	-0.1196	-0.1542	-0.1131	-0.1006	-0.1588	-0.1498	-0.1557
	7125	-0.1229	-0.1199	-0.1542	-0.1133	-0.1006	-0.1582	-0.1493	-0.156
	71333	-0.1229	-0.1196	-0.1543	-0.1133	-0.1005	-0.158	-0.1492	-0.1559
	71417	-0.1229	-0.1197	-0.1542	-0.113	-0.1008	-0.1577	-0.1489	-0.156
	7.15	-0.1228	-0.1196	-0.1543	-0.1135	-0.1006	-0.1572	-0.1484	-0.156
	71583	-0.1226	-0.1197	-0.1547	-0.1133	-0.1008	-0.1569	-0.1482	-0.1559
	71667	0.0735	-0.12	-0.1543	-0.1135	-0.1006	-0.1569	-0.1479	-0.1557
	71667	0.1044	-0.12	-0.1543	0.068	0.0594	0.0495	0.0469	0.0503
	7175	0.1044	-0.1199	-0.1542	0.095	0.0794	0.0814	0.0852	0.09
	71833	0.1026	-0.1199	0.0942	0.0962	0.0805	0.0837	0.0884	0.0936
	71917	0.1005	0.0782	0.1077	0.0959	0.0817	0.0849	0.0887	0.093
	7.2	0.0991	0.1041	0.1012	0.0945	0.0832	0.0845	0.0864	0.0909
	72083	0.098	0.1069	0.097	0.0932	0.0848	0.0838	0.0842	0.088
	72167	0.0973	0.1075	0.0954	0.0922	0.0871	0.0834	0.0819	0.0852
	7225	0.0977	0.1077	0.0939	0.0921	0.0895	0.0834	0.08	0.0831
	72333	0.0983	0.1087	0.0941	0.093	0.0918	0.0838	0.0787	0.0823
	72417	0.0993	0.1104	0.0947	0.0944	0.0939	0.0852	0.078	0.082
	7.25	0.0996	0.1121	0.0958	0.0954	0.0954	0.0869	0.0779	0.0834
	72583	0.0997	0.115	0.0964	0.0959	0.097	0.0881	0.078	0.0851
	72667	0.0999	0.1162	0.0967	0.0953	0.0976	0.0904	0.0785	0.0877
	7275	0.0997	0.1176	0.0967	0.0944	0.0974	0.0935	0.0794	0.0909
	72833	0.0997	0.1176	0.0964	0.093	0.0967	0.0962	0.0811	0.0932
	72917	0.0996	0.1171	0.0956	0.0915	0.0954	0.0988	0.0828	0.0953
	7.3	0.099	0.117	0.095	0.0898	0.0944	0.1002	0.0843	0.0973
	73083	0.0982	0.1162	0.0942	0.0884	0.0932	0.1015	0.086	0.0982
	73167	0.0974	0.1164	0.0936	0.0867	0.0918	0.1025	0.0869	0.0994
	7325	0.0971	0.1154	0.0929	0.0858	0.0901	0.1029	0.0886	0.0999
	73333	0.0968	0.1144	0.0924	0.0848	0.0889	0.1037	0.0895	0.1006
	73417	0.0962	0.1133	0.0918	0.0838	0.0878	0.104	0.0903	0.1015
	7.35	0.0956	0.1118	0.0912	0.0829	0.0872	0.1044	0.0915	0.1019
	73583	0.0956	0.1109	0.0906	0.0822	0.086	0.1051	0.0921	0.1026
	73667	0.0951	0.1109	0.0904	0.0814	0.0852	0.1058	0.0927	0.1029
	7375	0.0948	0.1101	0.0901	0.0809	0.0843	0.1063	0.0932	0.1037
	73833	0.095	0.1096	0.0898	0.0806	0.0838	0.1067	0.0933	0.1037
	73917	0.0945	0.1089	0.0898	0.0805	0.0834	0.1075	0.0938	0.1044
	7.4	0.0944	0.1089	0.0898	0.0803	0.0828	0.1083	0.0944	0.1051
	74083	0.0945	0.1084	0.0896	0.08	0.0822	0.109	0.0948	0.1055
	74167	0.0944	0.1081	0.0896	0.08	0.082	0.1101	0.0953	0.1058
	7425	0.0947	0.108	0.0896	0.08	0.0814	0.1113	0.0959	0.1064
	74333	0.0947	0.108	0.09	0.0799	0.0814	0.1127	0.0959	0.1069
	74417	0.095	0.1078	0.0901	0.0797	0.0811	0.1141	0.0967	0.1077
	7.45	0.0953	0.1078	0.0904	0.0797	0.0811	0.1154	0.0973	0.1083
	74583	0.0954	0.1078	0.0907	0.0799	0.0809	0.1177	0.0982	0.1093
	74667	0.0961	0.1081	0.0912	0.08	0.0809	0.12	0.0985	0.1098
	7475	0.0964	0.1083	0.0918	0.0802	0.0808	0.1223	0.0993	0.1106
	74833	0.097	0.1084	0.0925	0.0803	0.0811	0.1252	0.1	0.1116
	74917	0.0974	0.1087	0.0933	0.0808	0.0813	0.1279	0.1009	0.1125
	7.5	0.0982	0.1089	0.0942	0.0811	0.0816	0.1308	0.1019	0.1139
	75083	0.099	0.1093	0.0954	0.0814	0.0819	0.1333	0.1026	0.115
	75167	0.0997	0.1096	0.0965	0.0819	0.082	0.1365	0.1037	0.1162
	7525	0.1002	0.1101	0.0979	0.0823	0.0823	0.1395	0.1048	0.1173
	75333	0.1014	0.1102	0.0994	0.0832	0.0829	0.1418	0.106	0.1189
	75417	0.1023	0.1107	0.1012	0.0837	0.0832	0.1444	0.1069	0.12
	7.55	0.1031	0.1115	0.1029	0.0845	0.0838	0.1464	0.1086	0.1214
	75583	0.1041	0.1122	0.1055	0.0854	0.0845	0.1485	0.1099	0.1229
	75667	0.1057	0.113	0.1081	0.0863	0.0848	0.1505	0.1116	0.1241
	7575	0.1069	0.1138	0.111	0.0874	0.0858	0.1521	0.1128	0.1255
	75833	0.1084	0.1145	0.1148	0.0883	0.0866	0.1537	0.1145	0.127
	75917	0.1096	0.1157	0.1185	0.0896	0.0875	0.1553	0.1162	0.1281
	7.6	0.1113	0.1162	0.1225	0.0909	0.0883	0.156	0.1176	0.1296
	76083	0.1127	0.1177	0.1264	0.0924	0.09	0.1571	0.1192	0.1308
	76167	0.1144	0.1185	0.1298	0.0939	0.091	0.1582	0.1208	0.1325
	7625	0.1159	0.1197	0.1327	0.0956	0.0925	0.1594	0.1225	0.1341
	76333	0.1173	0.1212	0.135	0.0976	0.0944	0.1608	0.124	0.136
	76417	0.1186	0.1223	0.1366	0.0999	0.0965	0.162	0.1255	0.138
	7.65	0.1202	0.1238	0.138	0.1019	0.0985	0.1633	0.1269	0.14
	76583	0.1212	0.1257	0.1386	0.1044	0.1008	0.1646	0.1283	0.142
	76667	0.1226	0.1272	0.1391	0.1067	0.1037	0.1643	0.1295	0.1446
	7675	0.1234	0.1284	0.1391	0.109	0.1058	0.1652	0.1305	0.1472
	76833	0.1243	0.1302	0.1391	0.1115	0.108	0.1666	0.1319	0.1496
	76917	0.1247	0.1312	0.1391	0.113	0.1099	0.1669	0.1327	0.1518
	7.7	0.1252	0.1321	0.1391	0.1144	0.1113	0.1676	0.1336	0.1537
	77083	0.1254	0.1331	0.1391	0.1151	0.1124	0.1662	0.1347	0.1553
	77167	0.1252	0.1333	0.1389	0.1157	0.1125	0.1684	0.1357	0.1565
	7725	0.1255	0.1337	0.1389	0.1164	0.1127	0.1685	0.1369	0.1574
	77333	0.1255	0.1337	0.1389	0.1162	0.1127	0.1688	0.138	0.1574
	77417	0.1255	0.1337	0.1386	0.1164	0.1124	0.1687	0.1395	0.1575
	7.75	0.1254	0.1337	0.1388	0.1164	0.1124	0.1684	0.1406	0.1575
	77583	0.1249	0.1334	0.1386	0.1162	0.1121	0.1681	0.142	0.1574
	77667	0.1249	0.1334	0.1386	0.1162	0.1119	0.1678	0.1432	0.1571
	7775	0.1247	0.1331	0.1383	0.1159	0.1118	0.1675	0.1444	0.1566
	77833	0.1246	0.1328	0.1385	0.1157	0.1115	0.167	0.1458	0.1566
	77917	0.1246	0.1324	0.1385	0.1154	0.1112	0.1669	0.147	0.1563
	7.8	0.1244	0.1322	0.1382	0.1154	0.1112	0.1662	0.1481	0.1557
	78083	0.124	0.1324	0.1382	0.1154	0.111	0.1661	0.1493	0.1554
	78167	0.1241	0.1319	0.1382	0.1154	0.1109	0.1659	0.1501	0.155
	7825	0.1237	0.1318	0.1382	0.1151	0.1106	0.1655	0.1508	0.1545
	78333	0.1237	0.1316	0.1382	0.1151	0.1104	0.1652	0.1518	0.1545
	78417	0.1235	0.1315	0.1382	0.1148	0.1102	0.165	0.1521	0.1539
	7.85	0.1235	0.1313	0.1382	0.1148	0.1102	0.1646	0.1527	0.1536
	78583	0.1231	0.1312	0.1382	0.1147	0.1101	0.164	0.1528	0.1531
	78667	0.1229	0.1312	0.1382	0.1145	0.1099	0.163	0.1533	0.1527
	7875	0.1229	0.131	0.1382	0.1145	0.1098	0.1635	0.1536	0.1524
	78833	0.1228	0.1307	0.138	0.1144	0.1095	0.1633	0.1537	0.1519
	78917	0.1226	0.1308	0.1379	0.1145	0.1096	0.163	0.1537	0.1516
	7.9	0.1225	0.1307	0.1379	0.1141	0.1095	0.1627	0.1536	0.1514
	79083	0.1223	0.1305	0.1382	0.1141	0.1093	0.1623	0.1533	0.1508
	79167	0.1221	0.1304	0.138	0.1141	0.1092	0.1624	0.1533	0.1508
	7925	0.1221	0.1302	0.1379	0.1141	0.1092	0.162	0.153	0.1504
	79333	0.1218	0.1302	0.1379	0.1142	0.109	0.1617	0.153	0.1499
	79417	0.1218	0.1299	0.1379	0.1141	0.1089	0.1612	0.1527	0.1495
	7.95	0.1217	0.1298	0.1379	0.1141	0.1086	0.1606	0.1522	0.1495
	79583	0.1215	0.1301	0.1377	0.1141	0.1089	0.1606	0.1518	0.1489
	79667	0.1212	0.1299	0.1379	0.1139	0.1087	0.1603	0.1514	0.1485
	7975	0.1212	0.1296	0.1377	0.1139	0.1086	0.1601	0.151	0.1482
	79833	0.1211	0.1293	0.1377	0.1139	0.1086	0.16	0.1508	0.1482
	79917	0.1211	0.1293	0.1379	0.1138	0.1086	0.1595	0.1507	0.1478
	8	0.1211	0.1292	0.138	0.1136	0.1083	0.1595	0.1502	0.1473
	80083	0.1208	0.129	0.1377	0.1138	0.1084	0.1591	0.1499	0.147
	80167	0.1208	0.129	0.1377	0.1136	0.1081	0.1589	0.1498	0.1466
	8025	0.1205	0.129	0.1376	0.1135	0.108	0.1565	0.1495	0.1464
	80333	0.1205	0.129	0.1376	0.1135	0.1081	0.1579	0.1493	0.1463
	80417	0.1203	0.1287	0.1377	0.1138	0.1078	0.1579	0.1489	0.1455
	8.05	0.1202	0.1287	0.1376	0.1136	0.1078	0.1575	0.1485	0.1455
	80583	0.12	0.1286	0.1377	0.1135	0.108	0.1575	0.1481	0.1452
	80667	0.1202	0.1284	0.1376	0.1131	0.1078	0.1571	0.1481	0.1449
	8075	0.1199	0.1283	0.1377	0.1135	0.1078	0.1568	0.1476	0.1446
	80833	0.1199	0.1286	0.1376	0.1131	0.1077	0.1566	0.1475	0.1444
	80917	0.1196	0.1283	0.1377	0.1135	0.1078	0.1566	0.1463	0.144
	8.1	0.1196	0.1279	0.1376	0.1133	0.1077	0.1566	0.1463	0.144
	81083	0.1196	0.1279	0.1371	0.1133	0.1073	0.1562	0.1463	0.1434
	81167	0.1194	0.1281	0.1374	0.1133	0.1073	0.1559	0.146	0.1431
	8125	0.1192	0.1279	0.1374	0.1135	0.1073	0.1559	0.1463	0.1429
	81333	0.1194	0.1279	0.1374	0.113	0.1075	0.1557	0.146	0.1429
	81417	0.1194	0.1278	0.1374	0.1133	0.1072	0.1557	0.1455	0.1424
	8.15	0.1192	0.1278	0.1374	0.1133	0.1073	0.1553	0.1449	0.1423
	81583	0.1191	0.1275	0.1374	0.1131	0.1073	0.1551	0.1449	0.1418
	81667	-0.0719	0.1275	0.1373	0.1133	0.1073	0.1551	0.1447	0.1415
	81667	-0.1014	0.1273	0.1371	-0.0686	-0.0665	-0.0419	-0.0365	-0.0506
	8175	-0.1025	0.1273	0.1373	-0.0948	-0.0929	-0.0608	-0.0752	-0.0863
	81833	-0.1009	0.1272	-0.0716	-0.095	-0.0951	-0.0614	-0.077	-0.088
	81917	-0.0994	-0.0849	-0.0983	-0.0939	-0.0968	-0.062	-0.0761	-0.0874
	8.2	-0.0971	-0.0993	-0.0947	-0.093	-0.0977	-0.0625	-0.0756	-0.0857
	82083	-0.0965	-0.098	-0.0916	-0.0925	-0.0986	-0.0636	-0.0748	-0.0835
	82167	-0.095	-0.097	-0.0892	-0.0927	-0.0997	-0.064	-0.0741	-0.0817
	8225	-0.0947	-0.0961	-0.0883	-0.0932	-0.1	-0.0646	-0.0733	-0.0799
	82333	-0.0936	-0.095	-0.0878	-0.0944	-0.0999	-0.0652	-0.0727	-0.0791
	82417	-0.093	-0.0939	-0.0881	-0.0958	-0.0994	-0.0657	-0.0726	-0.0787
	8.25	-0.0927	-0.0929	-0.0887	-0.0967	-0.0977	-0.0668	-0.073	-0.079
	82583	-0.0924	-0.0919	-0.0892	-0.097	-0.0964	-0.0674	-0.0733	-0.0799
	82667	-0.0919	-0.0915	-0.0898	-0.0967	-0.0942	-0.0683	-0.0745	-0.0817
	8275	-0.0909	-0.0909	-0.0895	-0.0954	-0.0925	-0.0692	-0.0755	-0.084
	82833	-0.0903	-0.0901	-0.0892	-0.0944	-0.0906	-0.0704	-0.0771	-0.0866
	82917	-0.0898	-0.0896	-0.0889	-0.093	-0.0887	-0.0716	-0.0788	-0.0892
	8.3	-0.0898	-0.0887	-0.0881	-0.0915	-0.0872	-0.0724	-0.0809	-0.0907
	83083	-0.0892	-0.0878	-0.0875	-0.0898	-0.0855	-0.0732	-0.0831	-0.0921
	83167	-0.089	-0.0867	-0.0867	-0.0887	-0.0842	-0.0741	-0.0848	-0.0932
	8325	-0.0887	-0.0858	-0.0858	-0.0871	-0.0832	-0.0747	-0.0861	-0.0939
	83333	-0.0884	-0.0852	-0.0854	-0.086	-0.0822	-0.0756	-0.0878	-0.0948
	83417	-0.0878	-0.0842	-0.0848	-0.0851	-0.0809	-0.0762	-0.0892	-0.0953
	8.35	-0.0875	-0.0834	-0.0843	-0.0842	-0.0802	-0.077	-0.0901	-0.0961
	83583	-0.0872	-0.0828	-0.0838	-0.0832	-0.0796	-0.078	-0.0907	-0.0967
	83667	-0.0871	-0.0822	-0.0835	-0.0829	-0.079	-0.0791	-0.0916	-0.0973
	8375	-0.0869	-0.0816	-0.0831	-0.0825	-0.0787	-0.0797	-0.0918	-0.0979
	83833	-0.0867	-0.0811	-0.0826	-0.082	-0.0779	-0.0806	-0.0925	-0.0983
	83917	-0.0866	-0.0806	-0.0825	-0.0817	-0.0774	-0.0814	-0.0932	-0.0991
	8.4	-0.0864	-0.0802	-0.0823	-0.0813	-0.0771	-0.0822	-0.0939	-0.0999
	84083	-0.0863	-0.0799	-0.0823	-0.0808	-0.0767	-0.0828	-0.0942	-0.1005
	84167	-0.0863	-0.0796	-0.0823	-0.0803	-0.0765	-0.0832	-0.0945	-0.1014
	8425	-0.0861	-0.0794	-0.0823	-0.0802	-0.0765	-0.084	-0.0951	-0.1019
	84333	-0.0863	-0.0793	-0.0823	-0.08	-0.0764	-0.0846	-0.0956	-0.1025
	84417	-0.0863	-0.0791	-0.0823	-0.0802	-0.0764	-0.0854	-0.0961	-0.1035
	8.45	-0.0861	-0.0788	-0.0826	-0.08	-0.0762	-0.086	-0.0965	-0.1044
	84583	-0.0863	-0.0788	-0.0829	-0.08	-0.0762	-0.0869	-0.097	-0.1055
	84667	-0.0864	-0.0788	-0.0832	-0.0799	-0.0762	-0.0874	-0.0977	-0.1064
	8475	-0.0866	-0.0788	-0.0838	-0.0802	-0.0762	-0.0884	-0.0983	-0.1075
	84833	-0.0869	-0.0787	-0.0843	-0.0803	-0.0764	-0.0895	-0.0991	-0.1089
	84917	-0.0867	-0.0787	-0.0846	-0.0805	-0.0762	-0.0909	-0.0997	-0.1104
	8.5	-0.0872	-0.0785	-0.0852	-0.0805	-0.0764	-0.093	-0.1005	-0.1122
	85083	-0.0872	-0.0787	-0.0857	-0.0806	-0.0765	-0.095	-0.1014	-0.1136
	85167	-0.0877	-0.0785	-0.0864	-0.0811	-0.0765	-0.0973	-0.1023	-0.1157
	8525	-0.0881	-0.0785	-0.0872	-0.0814	-0.0768	-0.1002	-0.1032	-0.1177
	85333	-0.0884	-0.0787	-0.088	-0.0819	-0.077	-0.1029	-0.1044	-0.1203
	85417	-0.089	-0.0788	-0.089	-0.0823	-0.0773	-0.1046	-0.1054	-0.1228
	8.55	-0.0895	-0.0788	-0.0901	-0.0828	-0.0773	-0.1066	-0.1063	-0.1254
	85583	-0.0896	-0.0793	-0.0913	-0.0832	-0.0779	-0.1084	-0.1075	-0.1279
	85667	-0.09	-0.0794	-0.0925	-0.0838	-0.0784	-0.1104	-0.1083	-0.1304
	8575	-0.0904	-0.0799	-0.0941	-0.0846	-0.0785	-0.1119	-0.1095	-0.1324
	85833	-0.0913	-0.0802	-0.0956	-0.0849	-0.0788	-0.1138	-0.1104	-0.1344
	85917	-0.0921	-0.0806	-0.0973	-0.0855	-0.0793	-0.1159	-0.1119	-0.1357
	8.6	-0.0927	-0.0811	-0.0994	-0.0863	-0.0797	-0.1177	-0.113	-0.1371
	86083	-0.0933	-0.0813	-0.1015	-0.0871	-0.0802	-0.1197	-0.1144	-0.1383
	86167	-0.0942	-0.0819	-0.1041	-0.0881	-0.0805	-0.1217	-0.1157	-0.1397
	8625	-0.0947	-0.0825	-0.1066	-0.0887	-0.0811	-0.1241	-0.117	-0.1409
	86333	-0.0958	-0.0829	-0.1093	-0.09	-0.082	-0.1264	-0.1183	-0.1421
	86417	-0.0967	-0.0832	-0.1116	-0.0906	-0.0823	-0.1284	-0.1196	-0.1438
	8.65	-0.0977	-0.0843	-0.1142	-0.0916	-0.0829	-0.1307	-0.1206	-0.1453
	86583	-0.0988	-0.0848	-0.1165	-0.0925	-0.0837	-0.1328	-0.1218	-0.1469
	86667	-0.1	-0.0855	-0.1189	-0.0936	-0.0846	-0.135	-0.1229	-0.1485
	8675	-0.1009	-0.0863	-0.1208	-0.0947	-0.0852	-0.1379	-0.124	-0.1505
	86833	-0.1015	-0.0866	-0.1228	-0.0956	-0.0858	-0.1405	-0.1249	-0.1524
	86917	-0.1026	-0.0878	-0.1243	-0.0962	-0.0864	-0.1427	-0.1255	-0.1542
	8.7	-0.1035	-0.0886	-0.1252	-0.0968	-0.0871	-0.1453	-0.1264	-0.1562
	87083	-0.1038	-0.0893	-0.1263	-0.0974	-0.0875	-0.1472	-0.1272	-0.1579
	87167	-0.1043	-0.0903	-0.1269	-0.0977	-0.088	-0.1493	-0.1278	-0.1592
	8725	-0.1043	-0.0912	-0.1273	-0.098	-0.0881	-0.1513	-0.1286	-0.1608
	87333	-0.1043	-0.0924	-0.1278	-0.098	-0.0881	-0.1533	-0.1295	-0.1615
	87417	-0.1044	-0.0936	-0.1281	-0.0985	-0.088	-0.155	-0.1304	-0.1626
	8.75	-0.1043	-0.0945	-0.1281	-0.098	-0.0884	-0.1568	-0.1315	-0.1632
	87583	-0.104	-0.0954	-0.1281	-0.0979	-0.0881	-0.1579	-0.1327	-0.1632
	87667	-0.1038	-0.0962	-0.1286	-0.0979	-0.0878	-0.1594	-0.1334	-0.1637
	8775	-0.1037	-0.0968	-0.1284	-0.0976	-0.0878	-0.1608	-0.1345	-0.1627
	87833	-0.1034	-0.0971	-0.1283	-0.0974	-0.0878	-0.1618	-0.1359	-0.163
	87917	-0.1034	-0.0974	-0.1279	-0.0971	-0.0877	-0.1629	-0.1369	-0.163
	8.8	-0.1034	-0.0976	-0.1281	-0.0971	-0.0877	-0.1635	-0.138	-0.163
	88083	-0.1032	-0.0976	-0.1281	-0.0971	-0.0874	-0.1638	-0.1389	-0.1627
	88167	-0.1029	-0.0976	-0.1279	-0.097	-0.0875	-0.1641	-0.1397	-0.1624
	8825	-0.1031	-0.0976	-0.1278	-0.097	-0.0871	-0.1641	-0.1408	-0.1624
	88333	-0.1029	-0.0976	-0.1278	-0.097	-0.0872	-0.1638	-0.1418	-0.1621
	88417	-0.1028	-0.0974	-0.1278	-0.0965	-0.0869	-0.1635	-0.1424	-0.162
	8.85	-0.1026	-0.0974	-0.1279	-0.0967	-0.0869	-0.1635	-0.1434	-0.1617
	88583	-0.1023	-0.0977	-0.1279	-0.0965	-0.0866	-0.1637	-0.1438	-0.1615
	88667	-0.1022	-0.0973	-0.1278	-0.0962	-0.0866	-0.163	-0.1449	-0.1614
	8875	-0.1019	-0.0974	-0.1276	-0.0965	-0.0867	-0.1627	-0.1453	-0.1609
	88833	-0.1019	-0.0976	-0.1279	-0.0964	-0.0866	-0.1623	-0.146	-0.1606
	88917	-0.1019	-0.0974	-0.1275	-0.0962	-0.0864	-0.162	-0.1464	-0.1606
	8.9	-0.1019	-0.0976	-0.1276	-0.0962	-0.0864	-0.1614	-0.1466	-0.1601
	89083	-0.1014	-0.0977	-0.1275	-0.0959	-0.0863	-0.1612	-0.1472	-0.1597
	89167	-0.1015	-0.0977	-0.1275	-0.0961	-0.0861	-0.1611	-0.1473	-0.1594
	8925	-0.1015	-0.0977	-0.1273	-0.0962	-0.0861	-0.1601	-0.1469	-0.1592
	89333	-0.1012	-0.0976	-0.1275	-0.0958	-0.086	-0.1601	-0.1472	-0.1589
	89417	-0.1009	-0.0977	-0.1273	-0.0956	-0.0858	-0.1598	-0.1472	-0.1588
	8.95	-0.1011	-0.0976	-0.1273	-0.0956	-0.086	-0.1594	-0.1473	-0.1586
	89583	-0.1008	-0.0976	-0.1275	-0.0954	-0.0857	-0.1591	-0.1473	-0.1583
	89667	-0.1005	-0.0974	-0.1272	-0.0954	-0.0858	-0.1585	-0.147	-0.1582
	8975	-0.1006	-0.0976	-0.1275	-0.0954	-0.0857	-0.1583	-0.1469	-0.158
	89833	-0.1006	-0.0976	-0.1275	-0.0953	-0.0855	-0.1574	-0.1466	-0.1575
	89917	-0.1005	-0.0977	-0.1275	-0.0953	-0.0855	-0.1574	-0.1464	-0.1574
	9	-0.1005	-0.0973	-0.1272	-0.0953	-0.0852	-0.1571	-0.1461	-0.1571
	90083	-0.1003	-0.0976	-0.1272	-0.0953	-0.0854	-0.1568	-0.1458	-0.1568
	90167	-0.1003	-0.0974	-0.1272	-0.0951	-0.0854	-0.1566	-0.1458	-0.1565
	9025	-0.1	-0.0973	-0.1272	-0.0953	-0.0849	-0.1562	-0.145	-0.1562
	90333	-0.1	-0.0973	-0.1273	-0.0951	-0.0852	-0.156	-0.1447	-0.156
	90417	-0.0999	-0.0973	-0.1273	-0.095	-0.0849	-0.1556	-0.1447	-0.1559
	9.05	-0.0999	-0.0971	-0.1272	-0.095	-0.0849	-0.1542	-0.1443	-0.1556
	90583	-0.0997	-0.097	-0.1272	-0.095	-0.0849	-0.154	-0.1441	-0.1556
	90667	-0.0996	-0.0968	-0.1273	-0.0948	-0.0846	-0.1537	-0.1437	-0.1553
	9075	-0.0997	-0.0968	-0.1272	-0.0948	-0.0846	-0.1534	-0.1437	-0.1548
	90833	-0.0996	-0.0968	-0.1272	-0.095	-0.0848	-0.1534	-0.1432	-0.1547
	90917	-0.0996	-0.0968	-0.1273	-0.0948	-0.0846	-0.1528	-0.1432	-0.1543
	9.1	-0.0993	-0.0968	-0.1272	-0.0948	-0.0845	-0.1522	-0.1427	-0.1542
	91083	-0.0991	-0.0968	-0.1272	-0.0947	-0.0845	-0.1519	-0.1426	-0.154
	91167	-0.0991	-0.0968	-0.1272	-0.0947	-0.0843	-0.1518	-0.1415	-0.154
	9125	-0.0991	-0.097	-0.127	-0.0945	-0.0843	-0.1519	-0.1412	-0.1539
	91333	-0.0988	-0.0968	-0.127	-0.0947	-0.0843	-0.1518	-0.1409	-0.1533
	91417	-0.0988	-0.0967	-0.1272	-0.0947	-0.0842	-0.1514	-0.1408	-0.1531
	9.15	-0.099	-0.0967	-0.127	-0.0947	-0.0843	-0.1514	-0.1405	-0.1527
	91583	-0.0985	-0.0964	-0.127	-0.0945	-0.084	-0.1513	-0.1403	-0.1525
	91667	0.0535	-0.0965	-0.1269	-0.0945	-0.0842	-0.1507	-0.1402	-0.1525
	91667	0.0829	-0.0962	-0.127	0.0527	0.0455	0.0437	0.0405	0.0471
	9175	0.0881	-0.0964	-0.1269	0.0793	0.0694	0.0791	0.0785	0.086
	91833	0.0909	-0.0964	0.0764	0.0828	0.0719	0.0819	0.0825	0.0898
	91917	0.0924	0.0571	0.0986	0.0843	0.0738	0.0834	0.0834	0.0903
	9.2	0.0938	0.0829	0.0967	0.0851	0.0747	0.0837	0.0831	0.0889
	92083	0.0941	0.0877	0.0945	0.0851	0.0761	0.0843	0.0822	0.0869
	92167	0.0942	0.0901	0.093	0.0849	0.0768	0.0854	0.0811	0.0852
	9225	0.0941	0.0927	0.0918	0.0845	0.0774	0.0857	0.0799	0.0838
	92333	0.0935	0.0945	0.0912	0.0842	0.0782	0.0866	0.0791	0.0828
	92417	0.0925	0.0958	0.0913	0.084	0.0791	0.0869	0.0787	0.0825
	9.25	0.0921	0.0958	0.0919	0.084	0.0802	0.0881	0.0785	0.0829
	92583	0.0912	0.0965	0.0927	0.0842	0.0805	0.0895	0.0784	0.0837
	92667	0.0901	0.0977	0.0933	0.0843	0.0809	0.0915	0.0788	0.0849
	9275	0.089	0.0986	0.0938	0.084	0.0817	0.0929	0.0794	0.0874
	92833	0.0884	0.0991	0.0941	0.084	0.0817	0.0944	0.0805	0.0896
	92917	0.0877	0.099	0.0941	0.0834	0.0819	0.0956	0.0819	0.0916
	9.3	0.0866	0.099	0.0938	0.0829	0.0817	0.0967	0.0832	0.093
	93083	0.0861	0.1019	0.0935	0.0826	0.0816	0.0977	0.084	0.0944
	93167	0.0854	0.1015	0.0929	0.082	0.0809	0.0986	0.0848	0.0954
	9325	0.0851	0.1014	0.0921	0.0814	0.0806	0.099	0.0858	0.0961
	93333	0.0846	0.1022	0.0915	0.0808	0.0803	0.0993	0.0863	0.0965
	93417	0.0842	0.1026	0.0906	0.0802	0.0796	0.0999	0.0872	0.0974
	9.35	0.0837	0.1015	0.09	0.0796	0.0793	0.0997	0.088	0.0977
	93583	0.0834	0.1012	0.0892	0.079	0.0787	0.1006	0.0883	0.0979
	93667	0.0831	0.1003	0.0886	0.0782	0.0779	0.1014	0.0887	0.0982
	9375	0.0829	0.1	0.088	0.078	0.0774	0.1017	0.0889	0.0985
	93833	0.0826	0.0999	0.0874	0.0776	0.0773	0.1023	0.089	0.0991
	93917	0.0826	0.0996	0.0867	0.0773	0.0768	0.1026	0.0893	0.0991
	9.4	0.0825	0.099	0.0866	0.0771	0.0767	0.1031	0.0896	0.0996
	94083	0.0826	0.1029	0.0861	0.0768	0.0764	0.1035	0.0901	0.0996
	94167	0.0825	0.1028	0.086	0.0767	0.0762	0.1043	0.0903	0.0999
	9425	0.0825	0.1029	0.0857	0.0764	0.0759	0.1046	0.0904	0.1002
	94333	0.0825	0.1031	0.0855	0.0765	0.0759	0.1055	0.091	0.1008
	94417	0.0828	0.1028	0.0855	0.0764	0.0756	0.1064	0.0913	0.1011
	9.45	0.0829	0.1028	0.0855	0.0764	0.0752	0.1072	0.0915	0.1017
	94583	0.0829	0.1028	0.0855	0.0764	0.0755	0.1083	0.0921	0.1022
	94667	0.0832	0.1031	0.0855	0.0764	0.0755	0.109	0.0925	0.1025
	9475	0.0834	0.1029	0.0855	0.0764	0.0755	0.1104	0.0932	0.1028
	94833	0.0838	0.1031	0.0858	0.0767	0.0756	0.1119	0.0935	0.1032
	94917	0.084	0.1032	0.086	0.0768	0.0758	0.1138	0.0939	0.1035
	9.5	0.0845	0.1032	0.0863	0.0771	0.0761	0.116	0.0947	0.1041
	95083	0.0846	0.1034	0.0866	0.077	0.0762	0.1177	0.0951	0.1046
	95167	0.0854	0.1037	0.0871	0.0774	0.0761	0.1197	0.0959	0.1049
	9525	0.0857	0.1038	0.0875	0.0777	0.0765	0.1215	0.0964	0.1058
	95333	0.0863	0.104	0.0881	0.0779	0.0768	0.1235	0.097	0.1061
	95417	0.0866	0.1044	0.0887	0.0784	0.077	0.1254	0.0979	0.1067
	9.55	0.0874	0.1051	0.0895	0.0787	0.0774	0.1273	0.0985	0.1077
	95583	0.088	0.1057	0.0903	0.0793	0.0777	0.1289	0.0994	0.1084
	95667	0.0886	0.106	0.0913	0.0797	0.0782	0.1304	0.1	0.1092
	9575	0.0892	0.1066	0.0924	0.0805	0.0782	0.1321	0.1011	0.1099
	95833	0.0901	0.107	0.0936	0.0808	0.079	0.1334	0.102	0.1109
	95917	0.0909	0.1075	0.0947	0.0813	0.0797	0.135	0.1029	0.1116
	9.6	0.0921	0.1081	0.0961	0.0822	0.0802	0.136	0.1037	0.1125
	96083	0.0927	0.109	0.0976	0.0831	0.0806	0.1374	0.1048	0.113
	96167	0.0939	0.1096	0.0994	0.0838	0.0814	0.1385	0.1057	0.1141
	9625	0.0951	0.1104	0.1014	0.0849	0.082	0.1392	0.1067	0.1148
	96333	0.0961	0.1112	0.1037	0.0857	0.0831	0.1403	0.1073	0.1157
	96417	0.0971	0.1124	0.1061	0.0869	0.084	0.1412	0.1084	0.1164
	9.65	0.0983	0.1133	0.1084	0.0881	0.0848	0.1421	0.1093	0.1173
	96583	0.0997	0.1142	0.1102	0.089	0.0864	0.1432	0.1101	0.1179
	96667	0.1006	0.1154	0.1116	0.0906	0.0875	0.1443	0.1113	0.1188
	9675	0.1019	0.1165	0.113	0.0916	0.0887	0.1452	0.1119	0.12
	96833	0.1026	0.1173	0.1141	0.0929	0.0901	0.1464	0.1127	0.1209
	96917	0.1034	0.1183	0.115	0.0942	0.0913	0.1476	0.1138	0.1221
	9.7	0.1038	0.1186	0.1156	0.0953	0.0922	0.1487	0.1142	0.1231
	97083	0.1043	0.1189	0.116	0.0962	0.0933	0.1501	0.1151	0.1247
	97167	0.1043	0.1191	0.116	0.0971	0.0938	0.151	0.1159	0.1261
	9725	0.1046	0.1191	0.1162	0.0976	0.0941	0.1525	0.1165	0.1276
	97333	0.1044	0.1192	0.1164	0.0979	0.0944	0.1537	0.1171	0.1296
	97417	0.1046	0.1188	0.1164	0.098	0.0942	0.1551	0.1177	0.1318
	9.75	0.1044	0.1188	0.116	0.0982	0.0941	0.1557	0.1185	0.1341
	97583	0.1043	0.1186	0.116	0.0983	0.0938	0.1569	0.1191	0.1368
	97667	0.1041	0.1185	0.1159	0.0982	0.0939	0.1579	0.1194	0.1389
	9775	0.1038	0.1182	0.1157	0.098	0.0936	0.1586	0.1205	0.1409
	97833	0.1038	0.1182	0.1156	0.098	0.0935	0.1591	0.1211	0.1424
	97917	0.1035	0.118	0.1156	0.0977	0.0935	0.1594	0.122	0.1438
	9.8	0.1035	0.118	0.1156	0.0977	0.0933	0.1594	0.1226	0.145
	98083	0.1032	0.1179	0.1153	0.0976	0.0932	0.1597	0.1237	0.1461
	98167	0.1031	0.118	0.1151	0.0976	0.0929	0.1595	0.1244	0.1466
	9825	0.1029	0.1177	0.1151	0.0974	0.0929	0.1594	0.1255	0.147
	98333	0.1029	0.1179	0.115	0.0971	0.0924	0.1591	0.1267	0.1473
	98417	0.1029	0.1174	0.1148	0.0973	0.0924	0.1592	0.1279	0.1476
	9.85	0.1028	0.1173	0.115	0.097	0.0922	0.1588	0.1292	0.1473
	98583	0.1026	0.117	0.115	0.0968	0.0922	0.1585	0.1302	0.1475
	98667	0.1025	0.117	0.1147	0.0967	0.0922	0.1582	0.1318	0.1473
	9875	0.1023	0.117	0.1145	0.0965	0.0919	0.158	0.133	0.147
	98833	0.1022	0.1167	0.1147	0.0967	0.0916	0.1579	0.1342	0.1467
	98917	0.102	0.1167	0.1144	0.0965	0.0915	0.1575	0.1356	0.1466
	9.9	0.1019	0.1167	0.1144	0.0962	0.0916	0.1571	0.1369	0.1461
	99083	0.102	0.1167	0.1144	0.0964	0.0915	0.1566	0.1382	0.146
	99167	0.1017	0.1165	0.1142	0.0962	0.0913	0.1563	0.1392	0.1456
	9925	0.1015	0.116	0.1142	0.0961	0.091	0.1562	0.1403	0.1452
	99333	0.1015	0.1164	0.1141	0.0959	0.0912	0.1559	0.1412	0.1452
	99417	0.1012	0.1162	0.1141	0.0959	0.091	0.1557	0.1418	0.1449
	9.95	0.1012	0.1159	0.1142	0.0959	0.0909	0.1554	0.1424	0.1444
	99583	0.1009	0.1159	0.1141	0.0954	0.0907	0.1554	0.1427	0.1441
	99667	0.1008	0.1159	0.1139	0.0956	0.0907	0.1553	0.1431	0.1438
	9975	0.1008	0.1157	0.1139	0.0953	0.0907	0.1551	0.1435	0.1437
	99833	0.1008	0.1156	0.1139	0.0953	0.0904	0.1548	0.1435	0.1434
	99917	0.1006	0.1157	0.1136	0.0953	0.0904	0.1547	0.1437	0.1431
	10	0.1005	0.1153	0.1138	0.095	0.0904	0.1539	0.1437	0.1427
	100083	0.1005	0.1153	0.1136	0.0951	0.0901	0.154	0.1434	0.1424
	100167	0.1003	0.1153	0.1135	0.095	0.0901	0.1537	0.1434	0.1421
	10025	0.1003	0.1153	0.1136	0.095	0.0901	0.1534	0.1431	0.142
	100333	0.1	0.1153	0.1135	0.0947	0.0898	0.1533	0.1429	0.1414
	100417	0.0999	0.115	0.1136	0.0947	0.09	0.153	0.1427	0.1412
	10.05	0.1	0.1148	0.1135	0.0945	0.09	0.1528	0.1424	0.1412
	100583	0.0997	0.1148	0.1136	0.0945	0.0896	0.1527	0.1423	0.1409
	100667	0.0997	0.1148	0.1135	0.0945	0.0896	0.1524	0.142	0.1408
	10075	0.0996	0.1147	0.1133	0.0945	0.0895	0.1524	0.1421	0.1403
	100833	0.0994	0.1148	0.1136	0.0945	0.0896	0.1521	0.1417	0.1403
	100917	0.0994	0.1147	0.1133	0.0945	0.0895	0.1519	0.1414	0.14
	10.1	0.0994	0.1147	0.1135	0.0945	0.0892	0.1511	0.1412	0.1394
	101083	0.0993	0.1145	0.1131	0.0944	0.0892	0.151	0.1409	0.1389
	101167	0.0991	0.1144	0.1133	0.0944	0.0892	0.1508	0.1406	0.1385
	10125	0.099	0.1145	0.1131	0.0944	0.0895	0.1505	0.1405	0.138
	101333	0.0988	0.1144	0.1131	0.0941	0.089	0.1505	0.1403	0.1382
	101417	0.099	0.1142	0.113	0.0942	0.0887	0.1501	0.1398	0.1377
	10.15	0.0986	0.1141	0.113	0.0941	0.0887	0.1501	0.1397	0.1377
	101583	0.099	0.1139	0.113	0.0942	0.0886	0.1499	0.1397	0.1374
	101667	-0.0553	0.1141	0.1128	0.0938	0.0886	0.1498	0.1395	0.1373
	101667	-0.084	0.1139	0.113	-0.0538	-0.0512	-0.0384	-0.0332	-0.0478
	10175	-0.0887	0.1136	0.113	-0.0802	-0.0767	-0.0602	-0.0726	-0.0822
	101833	-0.091	0.1138	-0.0584	-0.0831	-0.08	-0.0599	-0.0742	-0.0852
	101917	-0.0924	-0.0733	-0.0884	-0.0845	-0.0822	-0.0607	-0.0748	-0.0854
	10.2	-0.0933	-0.088	-0.0887	-0.0848	-0.0835	-0.0608	-0.0755	-0.0849
	102083	-0.0932	-0.0861	-0.0878	-0.0845	-0.0843	-0.0616	-0.075	-0.0838
	102167	-0.093	-0.0866	-0.0864	-0.0843	-0.0849	-0.0625	-0.0748	-0.0826
	10225	-0.0925	-0.0867	-0.0857	-0.0843	-0.0855	-0.0637	-0.0745	-0.0816
	102333	-0.0915	-0.0871	-0.0851	-0.0842	-0.0855	-0.0648	-0.0744	-0.0811
	102417	-0.09	-0.086	-0.0848	-0.0842	-0.0854	-0.0658	-0.0742	-0.0808
	10.25	-0.0892	-0.0855	-0.0848	-0.0842	-0.0851	-0.0671	-0.0742	-0.0813
	102583	-0.0877	-0.0849	-0.0851	-0.0845	-0.0846	-0.0681	-0.075	-0.0819
	102667	-0.0866	-0.0838	-0.0854	-0.0851	-0.0843	-0.0694	-0.0753	-0.0829
	10275	-0.0854	-0.0831	-0.0858	-0.0848	-0.0837	-0.0706	-0.0761	-0.0849
	102833	-0.0845	-0.0822	-0.0858	-0.0848	-0.0826	-0.0715	-0.0774	-0.0867
	102917	-0.0832	-0.0814	-0.086	-0.0845	-0.082	-0.0724	-0.0788	-0.0887
	10.3	-0.0822	-0.0802	-0.0858	-0.084	-0.0809	-0.0732	-0.0803	-0.0903
	103083	-0.0814	-0.0791	-0.0855	-0.0832	-0.08	-0.0741	-0.0817	-0.0915
	103167	-0.0803	-0.0782	-0.0851	-0.0828	-0.0794	-0.0747	-0.0834	-0.0924
	10325	-0.0797	-0.0776	-0.0848	-0.0823	-0.0785	-0.0755	-0.0848	-0.0929
	103333	-0.079	-0.0765	-0.0845	-0.0816	-0.0779	-0.0765	-0.0857	-0.0932
	103417	-0.0785	-0.0759	-0.0838	-0.0809	-0.0768	-0.0773	-0.0866	-0.0932
	10.35	-0.0782	-0.0752	-0.0831	-0.08	-0.0765	-0.0776	-0.0871	-0.0939
	103583	-0.0776	-0.0745	-0.0826	-0.0797	-0.0758	-0.0785	-0.0875	-0.0941
	103667	-0.0771	-0.0738	-0.0822	-0.0794	-0.075	-0.079	-0.088	-0.0945
	10375	-0.077	-0.0732	-0.0817	-0.0788	-0.0747	-0.0797	-0.0886	-0.0951
	103833	-0.0768	-0.0726	-0.0813	-0.0784	-0.0742	-0.0802	-0.0889	-0.0951
	103917	-0.0768	-0.0723	-0.0809	-0.0779	-0.0739	-0.0808	-0.0892	-0.0954
	10.4	-0.0765	-0.0716	-0.0806	-0.0777	-0.0733	-0.0814	-0.0892	-0.0958
	104083	-0.0764	-0.0718	-0.0803	-0.0773	-0.0732	-0.082	-0.0898	-0.0964
	104167	-0.0764	-0.0715	-0.0803	-0.0771	-0.073	-0.0825	-0.0901	-0.0968
	10425	-0.0764	-0.0719	-0.08	-0.077	-0.0727	-0.0834	-0.0904	-0.0973
	104333	-0.0764	-0.0715	-0.0799	-0.0768	-0.0726	-0.0842	-0.0909	-0.0979
	104417	-0.0762	-0.0713	-0.0796	-0.0767	-0.0721	-0.0851	-0.0912	-0.0982
	10.45	-0.0764	-0.0715	-0.0796	-0.0765	-0.0721	-0.0858	-0.0918	-0.0988
	104583	-0.0762	-0.0716	-0.0797	-0.0765	-0.0719	-0.0871	-0.0919	-0.0996
	104667	-0.0764	-0.0716	-0.08	-0.0767	-0.0719	-0.0883	-0.0924	-0.1002
	10475	-0.0765	-0.0715	-0.08	-0.0762	-0.0719	-0.0901	-0.0927	-0.1008
	104833	-0.0764	-0.0718	-0.0802	-0.0764	-0.0718	-0.0922	-0.0932	-0.1015
	104917	-0.0765	-0.0715	-0.0805	-0.0765	-0.0718	-0.0939	-0.0936	-0.1028
	10.5	-0.0767	-0.0715	-0.0805	-0.0765	-0.0716	-0.0953	-0.0942	-0.1037
	105083	-0.0767	-0.0716	-0.0809	-0.0765	-0.0718	-0.0967	-0.0947	-0.1048
	105167	-0.077	-0.0715	-0.0811	-0.0767	-0.0718	-0.0976	-0.0951	-0.1061
	10525	-0.0771	-0.0715	-0.0817	-0.0768	-0.0716	-0.099	-0.0961	-0.1072
	105333	-0.0773	-0.0718	-0.0817	-0.0771	-0.0718	-0.1002	-0.0967	-0.109
	105417	-0.0774	-0.0718	-0.0823	-0.0773	-0.0719	-0.1012	-0.0973	-0.1104
	10.55	-0.0777	-0.0719	-0.0825	-0.0773	-0.0719	-0.1028	-0.098	-0.1119
	105583	-0.0779	-0.0719	-0.0831	-0.0776	-0.0718	-0.1037	-0.0991	-0.1135
	105667	-0.0782	-0.0719	-0.0837	-0.0779	-0.0721	-0.1054	-0.0996	-0.115
	10575	-0.0787	-0.0721	-0.0843	-0.0782	-0.0721	-0.1067	-0.1002	-0.1168
	105833	-0.0788	-0.0723	-0.0849	-0.0784	-0.0721	-0.1078	-0.1011	-0.1182
	105917	-0.0791	-0.0724	-0.0857	-0.0787	-0.0723	-0.109	-0.1017	-0.1199
	10.6	-0.0796	-0.0724	-0.0866	-0.079	-0.0724	-0.1099	-0.1023	-0.1209
	106083	-0.0796	-0.0726	-0.0875	-0.0793	-0.0726	-0.1112	-0.1028	-0.122
	106167	-0.0802	-0.0727	-0.0886	-0.0796	-0.0729	-0.1122	-0.1034	-0.1229
	10625	-0.0802	-0.0736	-0.0896	-0.0799	-0.0732	-0.1135	-0.1043	-0.124
	106333	-0.0809	-0.0738	-0.0907	-0.0802	-0.0732	-0.1147	-0.1049	-0.125
	106417	-0.0816	-0.0741	-0.0919	-0.0806	-0.0733	-0.1159	-0.1055	-0.126
	10.65	-0.082	-0.0739	-0.0932	-0.0813	-0.0735	-0.1174	-0.1063	-0.1269
	106583	-0.0826	-0.0745	-0.0948	-0.0814	-0.0738	-0.1188	-0.1069	-0.1278
	106667	-0.0831	-0.0745	-0.0964	-0.082	-0.0739	-0.1203	-0.1073	-0.1287
	10675	-0.0835	-0.0747	-0.0977	-0.0822	-0.0742	-0.1215	-0.1081	-0.1298
	106833	-0.0843	-0.0752	-0.0993	-0.0828	-0.0742	-0.1229	-0.109	-0.1308
	106917	-0.0846	-0.0753	-0.1009	-0.0829	-0.0748	-0.1243	-0.1095	-0.1321
	10.7	-0.0855	-0.0758	-0.1023	-0.0835	-0.075	-0.1257	-0.1099	-0.1333
	107083	-0.0861	-0.0759	-0.1035	-0.084	-0.075	-0.1275	-0.1106	-0.1348
	107167	-0.0864	-0.0765	-0.1049	-0.0843	-0.0752	-0.1287	-0.1112	-0.1363
	10725	-0.0871	-0.0771	-0.1057	-0.0845	-0.0756	-0.1299	-0.1113	-0.1376
	107333	-0.0872	-0.0774	-0.1066	-0.0846	-0.0758	-0.1315	-0.1119	-0.1395
	107417	-0.0874	-0.0779	-0.107	-0.0848	-0.0756	-0.1331	-0.1127	-0.1414
	10.75	-0.0875	-0.0784	-0.1077	-0.0849	-0.0758	-0.1344	-0.113	-0.1434
	107583	-0.0877	-0.0787	-0.108	-0.0851	-0.0761	-0.1356	-0.1136	-0.1453
	107667	-0.0877	-0.0794	-0.1084	-0.0852	-0.0759	-0.1369	-0.1142	-0.1472
	10775	-0.0877	-0.0799	-0.1087	-0.0852	-0.0761	-0.1383	-0.1148	-0.149
	107833	-0.0875	-0.0803	-0.1089	-0.0851	-0.0764	-0.14	-0.1154	-0.1511
	107917	-0.0875	-0.0809	-0.1087	-0.0851	-0.0762	-0.1415	-0.116	-0.1528
	10.8	-0.0875	-0.0813	-0.1087	-0.0851	-0.0761	-0.1432	-0.1168	-0.1543
	108083	-0.0872	-0.0817	-0.1086	-0.0849	-0.0764	-0.1443	-0.1177	-0.1556
	108167	-0.0872	-0.0819	-0.1087	-0.0851	-0.0764	-0.1455	-0.1186	-0.1563
	10825	-0.0872	-0.0826	-0.1086	-0.0849	-0.0765	-0.1472	-0.1196	-0.1571
	108333	-0.0872	-0.0826	-0.1089	-0.0849	-0.0764	-0.1485	-0.1206	-0.1577
	108417	-0.0869	-0.0829	-0.1084	-0.0846	-0.0762	-0.1501	-0.1218	-0.1577
	10.85	-0.0871	-0.0828	-0.1084	-0.0849	-0.0764	-0.1508	-0.1231	-0.1579
	108583	-0.0867	-0.0828	-0.1084	-0.0848	-0.0761	-0.1519	-0.1243	-0.1577
	108667	-0.0867	-0.0831	-0.1083	-0.0846	-0.0759	-0.1527	-0.1255	-0.1574
	10875	-0.0864	-0.0831	-0.1083	-0.0845	-0.0761	-0.1533	-0.1267	-0.1569
	108833	-0.0867	-0.0832	-0.1083	-0.0845	-0.0759	-0.1542	-0.1281	-0.1568
	108917	-0.0866	-0.0832	-0.1081	-0.0843	-0.0759	-0.1545	-0.1292	-0.1566
	10.9	-0.0864	-0.0834	-0.1078	-0.0845	-0.0758	-0.1525	-0.1302	-0.1565
	109083	-0.0866	-0.0831	-0.1077	-0.0843	-0.0758	-0.1547	-0.1316	-0.1563
	109167	-0.0861	-0.0832	-0.1077	-0.0845	-0.0758	-0.155	-0.1328	-0.156
	10925	-0.0861	-0.0831	-0.1077	-0.0842	-0.0756	-0.1547	-0.1336	-0.1562
	109333	-0.086	-0.0829	-0.1077	-0.084	-0.0756	-0.1543	-0.1348	-0.1556
	109417	-0.0858	-0.0829	-0.1075	-0.084	-0.0755	-0.1542	-0.1356	-0.1554
	10.95	-0.086	-0.0828	-0.1073	-0.0838	-0.0755	-0.1537	-0.1363	-0.1551
	109583	-0.0857	-0.0828	-0.1073	-0.0838	-0.0753	-0.1536	-0.1373	-0.155
	109667	-0.0858	-0.0829	-0.1075	-0.0837	-0.0752	-0.1534	-0.1379	-0.1545
	10975	-0.0855	-0.0828	-0.1073	-0.0834	-0.075	-0.1527	-0.1385	-0.1539
	109833	-0.0857	-0.0829	-0.107	-0.0835	-0.0752	-0.1524	-0.1391	-0.1537
	109917	-0.0854	-0.0828	-0.1072	-0.0834	-0.0748	-0.1521	-0.1392	-0.1537
	11	-0.0854	-0.0828	-0.107	-0.0834	-0.0748	-0.1519	-0.1391	-0.1534
	110083	-0.0852	-0.0825	-0.107	-0.0834	-0.0748	-0.1514	-0.1389	-0.1533
	110167	-0.0852	-0.0828	-0.1069	-0.0832	-0.0747	-0.1513	-0.1394	-0.153
	11025	-0.0851	-0.0825	-0.1069	-0.0831	-0.0747	-0.1508	-0.1392	-0.1527
	110333	-0.0851	-0.0826	-0.1067	-0.0829	-0.0747	-0.1507	-0.1389	-0.1525
	110417	-0.0848	-0.0823	-0.1069	-0.0831	-0.0745	-0.1505	-0.1388	-0.1525
	11.05	-0.0849	-0.0823	-0.1067	-0.0829	-0.0745	-0.1501	-0.1386	-0.1518
	110583	-0.0848	-0.0823	-0.1069	-0.0829	-0.0745	-0.1495	-0.1383	-0.1518
	110667	-0.0846	-0.0822	-0.1067	-0.0829	-0.0744	-0.1492	-0.1382	-0.1516
	11075	-0.0846	-0.0822	-0.1067	-0.0828	-0.0739	-0.1489	-0.1377	-0.1513
	110833	-0.0846	-0.0823	-0.1066	-0.0828	-0.0742	-0.1487	-0.1377	-0.1511
	110917	-0.0845	-0.0823	-0.1066	-0.0828	-0.0742	-0.1484	-0.1376	-0.151
	11.1	-0.0843	-0.0822	-0.1066	-0.0826	-0.0739	-0.1461	-0.1376	-0.1508
	111083	-0.0842	-0.0822	-0.1064	-0.0826	-0.0739	-0.1478	-0.1369	-0.1505
	111167	-0.0845	-0.082	-0.1066	-0.0825	-0.0739	-0.1475	-0.1369	-0.1504
	11125	-0.084	-0.082	-0.1067	-0.0823	-0.0738	-0.1473	-0.1365	-0.1501
	111333	-0.0842	-0.082	-0.1064	-0.0822	-0.0738	-0.1472	-0.1365	-0.1499
	111417	-0.0843	-0.0817	-0.1063	-0.0823	-0.0736	-0.1467	-0.1363	-0.1498
	11.15	-0.084	-0.0819	-0.1063	-0.0822	-0.0736	-0.1464	-0.1359	-0.1496
	111583	-0.0843	-0.0819	-0.1061	-0.0823	-0.0736	-0.1461	-0.1359	-0.1487
	111667	0.0405	-0.0817	-0.1061	-0.0822	-0.0736	-0.1456	-0.1356	-0.1482
	111667	0.0677	-0.0817	-0.1061	0.0414	0.0359	0.0405	0.0387	0.0445
	11175	0.0726	-0.0816	-0.1061	0.0669	0.0603	0.0747	0.0768	0.0834
	111833	0.0759	-0.0817	0.0596	0.0713	0.0639	0.0788	0.0805	0.0871
	111917	0.0784	0.0445	0.0872	0.0738	0.066	0.0806	0.0817	0.088
	11.2	0.0799	0.0681	0.0892	0.0753	0.0674	0.0825	0.0817	0.0874
	112083	0.0814	0.0733	0.0887	0.0762	0.0683	0.0832	0.0811	0.0861
	112167	0.0825	0.0768	0.0889	0.0768	0.069	0.0846	0.0806	0.0851
	11225	0.0831	0.0793	0.0881	0.0771	0.0697	0.0854	0.0794	0.084
	112333	0.0835	0.0813	0.0874	0.0774	0.0701	0.086	0.0787	0.0834
	112417	0.0837	0.0826	0.0869	0.0773	0.0706	0.0866	0.0779	0.0828
	11.25	0.0837	0.0845	0.0867	0.0768	0.071	0.0875	0.0777	0.0828
	112583	0.0834	0.0861	0.0869	0.077	0.0713	0.0884	0.0774	0.0837
	112667	0.0831	0.0874	0.0869	0.0767	0.0716	0.0893	0.0774	0.0845
	11275	0.0829	0.0886	0.0874	0.0767	0.0719	0.0903	0.0779	0.0858
	112833	0.0823	0.0896	0.0877	0.0765	0.0721	0.0915	0.0782	0.0874
	112917	0.0816	0.0898	0.0875	0.0762	0.0724	0.0924	0.0788	0.0889
	11.3	0.0808	0.0986	0.0874	0.0761	0.0726	0.093	0.0799	0.0907
	113083	0.08	0.1006	0.0869	0.0759	0.0724	0.0936	0.0806	0.0916
	113167	0.0796	0.1011	0.0864	0.0758	0.0724	0.0945	0.0811	0.0921
	11325	0.0788	0.1012	0.0861	0.0755	0.0724	0.0951	0.0819	0.0927
	113333	0.0782	0.1011	0.0855	0.0752	0.0721	0.0956	0.0823	0.0933
	113417	0.0779	0.1008	0.0852	0.0748	0.0718	0.0964	0.0831	0.0938
	11.35	0.0773	0.1006	0.0845	0.0745	0.0719	0.0971	0.0832	0.0941
	113583	0.077	0.1002	0.0838	0.0742	0.0716	0.0977	0.084	0.0941
	113667	0.0765	0.1	0.0835	0.0741	0.0712	0.098	0.0842	0.0944
	11375	0.0765	0.0996	0.0828	0.0738	0.0712	0.0985	0.0845	0.0947
	113833	0.0761	0.0994	0.0825	0.0736	0.0709	0.099	0.0845	0.0948
	113917	0.0761	0.0988	0.0819	0.0732	0.0709	0.0993	0.0846	0.0948
	11.4	0.0758	0.0988	0.0817	0.073	0.0709	0.0996	0.0848	0.0951
	114083	0.0756	0.0983	0.0814	0.073	0.0706	0.0999	0.0849	0.095
	114167	0.0758	0.0986	0.0809	0.0729	0.0703	0.1002	0.0851	0.0953
	11425	0.0755	0.0988	0.0803	0.0726	0.0703	0.1002	0.0851	0.0954
	114333	0.0755	0.0986	0.0805	0.0726	0.0703	0.1008	0.0854	0.0959
	114417	0.0755	0.0983	0.0802	0.0727	0.0703	0.1012	0.0855	0.0961
	11.45	0.0756	0.0986	0.0802	0.0727	0.0701	0.1017	0.0858	0.0962
	114583	0.0756	0.0999	0.0802	0.0724	0.0701	0.1022	0.0858	0.0965
	114667	0.0756	0.0999	0.0802	0.0726	0.0701	0.1032	0.0863	0.0967
	11475	0.0758	0.0997	0.0802	0.0727	0.07	0.1038	0.0864	0.0971
	114833	0.0759	0.0996	0.0802	0.0729	0.07	0.1044	0.0871	0.0977
	114917	0.0759	0.0999	0.0802	0.0729	0.0701	0.106	0.0872	0.098
	11.5	0.0759	0.1003	0.0802	0.0729	0.0703	0.1067	0.0877	0.0985
	115083	0.0761	0.1003	0.0805	0.0729	0.0706	0.1078	0.088	0.099
	115167	0.0762	0.1048	0.0805	0.0729	0.0706	0.1087	0.0884	0.0993
	11525	0.0767	0.1069	0.0808	0.0735	0.0704	0.1104	0.089	0.0996
	115333	0.077	0.107	0.0811	0.0735	0.0706	0.1116	0.0893	0.1003
	115417	0.0773	0.1072	0.0814	0.0736	0.0709	0.113	0.0901	0.1008
	11.55	0.0773	0.1072	0.0817	0.0739	0.071	0.1144	0.0906	0.1014
	115583	0.0776	0.1075	0.0822	0.0739	0.0712	0.1159	0.0913	0.102
	115667	0.0779	0.1077	0.0826	0.0741	0.0716	0.1173	0.0916	0.1025
	11575	0.0784	0.1081	0.0829	0.0748	0.0716	0.1183	0.0925	0.1029
	115833	0.0787	0.1084	0.0832	0.075	0.0716	0.1194	0.093	0.1034
	115917	0.079	0.1087	0.0837	0.0753	0.0721	0.1203	0.0938	0.1041
	11.6	0.0794	0.1086	0.0848	0.0756	0.0724	0.1212	0.0942	0.1046
	116083	0.0799	0.109	0.0851	0.0762	0.0727	0.1221	0.0948	0.1052
	116167	0.0806	0.1095	0.0858	0.0765	0.073	0.1229	0.0956	0.1058
	11625	0.0813	0.1099	0.0866	0.0767	0.0733	0.1238	0.0962	0.1063
	116333	0.0817	0.1101	0.0878	0.0773	0.0739	0.1243	0.097	0.1067
	116417	0.0823	0.1104	0.0883	0.0777	0.0741	0.1249	0.0976	0.1075
	11.65	0.0834	0.1107	0.0892	0.078	0.0747	0.1257	0.0982	0.108
	116583	0.0842	0.111	0.0906	0.079	0.0747	0.1263	0.0986	0.1084
	116667	0.0848	0.1115	0.0916	0.0794	0.0755	0.127	0.0996	0.1089
	11675	0.0857	0.1121	0.0929	0.0797	0.0759	0.1278	0.0997	0.1095
	116833	0.0864	0.1122	0.0938	0.0802	0.0765	0.1283	0.1003	0.1101
	116917	0.0875	0.1127	0.0953	0.0808	0.077	0.1289	0.1011	0.1106
	11.7	0.0881	0.1135	0.0961	0.0813	0.0773	0.1299	0.1017	0.1113
	117083	0.0889	0.1136	0.0968	0.0817	0.0779	0.1307	0.1022	0.1119
	117167	0.089	0.1141	0.0973	0.0823	0.0782	0.1313	0.1025	0.1127
	11725	0.0895	0.1142	0.0976	0.0828	0.0788	0.1324	0.1032	0.1133
	117333	0.0898	0.1145	0.098	0.0829	0.079	0.1334	0.1035	0.1141
	117417	0.0895	0.1148	0.0979	0.0831	0.0793	0.135	0.104	0.115
	11.75	0.0896	0.116	0.0983	0.0835	0.0794	0.136	0.1046	0.1156
	117583	0.0896	0.1162	0.0982	0.0837	0.0797	0.1373	0.1051	0.1167
	117667	0.0895	0.1164	0.0983	0.0837	0.0797	0.1382	0.1055	0.1177
	11775	0.0893	0.1165	0.0982	0.0838	0.0797	0.1402	0.1061	0.1189
	117833	0.0893	0.1174	0.0985	0.0837	0.0797	0.1418	0.1067	0.1203
	117917	0.0893	0.1173	0.0983	0.0838	0.0799	0.1435	0.107	0.1218
	11.8	0.0892	0.1173	0.0985	0.0837	0.0797	0.1429	0.1078	0.1235
	118083	0.089	0.1174	0.098	0.0838	0.0799	0.1453	0.1084	0.1254
	118167	0.0889	0.117	0.098	0.0837	0.0796	0.1469	0.109	0.1272
	11825	0.0886	0.1173	0.098	0.0837	0.0797	0.1482	0.1098	0.1295
	118333	0.0887	0.117	0.0979	0.0835	0.0796	0.1493	0.1102	0.1315
	118417	0.0887	0.1173	0.098	0.0837	0.0797	0.1498	0.1107	0.1334
	11.85	0.0886	0.1171	0.0979	0.0835	0.0794	0.1511	0.1119	0.1354
	118583	0.0884	0.1173	0.0979	0.0834	0.0796	0.1518	0.1125	0.1371
	118667	0.0883	0.1249	0.0977	0.0835	0.0793	0.1521	0.1133	0.138
	11875	0.0883	0.1252	0.0979	0.0834	0.0793	0.1522	0.1141	0.1395
	118833	0.0883	0.1252	0.0976	0.0832	0.079	0.1525	0.115	0.1403
	118917	0.0878	0.125	0.0976	0.0832	0.079	0.1527	0.1162	0.1406
	11.9	0.088	0.1249	0.0974	0.0834	0.0787	0.1525	0.1171	0.1412
	119083	0.088	0.1247	0.0974	0.0829	0.0788	0.1524	0.1185	0.1412
	119167	0.088	0.1246	0.0974	0.0831	0.0787	0.1524	0.1197	0.1417
	11925	0.0877	0.1238	0.0974	0.0828	0.0785	0.1522	0.1212	0.1414
	119333	0.0877	0.1231	0.0973	0.0829	0.0784	0.1519	0.1225	0.1414
	119417	0.0877	0.1235	0.0971	0.0828	0.0782	0.1513	0.1238	0.1412
	11.95	0.0872	0.1232	0.097	0.0826	0.0784	0.1516	0.1255	0.1409
	119583	0.0872	0.1234	0.0971	0.0828	0.0784	0.1511	0.127	0.1408
	119667	0.0871	0.1234	0.097	0.0825	0.0779	0.151	0.1286	0.1406
	11975	0.0869	0.1235	0.0971	0.0823	0.0779	0.1507	0.1298	0.1403
	119833	0.0867	0.1232	0.0967	0.0825	0.078	0.1504	0.1313	0.1402
	119917	0.0867	0.1232	0.0968	0.0825	0.0779	0.1501	0.1328	0.14
	12	0.0866	0.1232	0.0968	0.0823	0.078	0.1499	0.1337	0.14
	120083	0.0864	0.1234	0.0965	0.0822	0.0779	0.1496	0.1347	0.1394
	120167	0.0866	0.1234	0.0967	0.0822	0.0777	0.1495	0.1354	0.1392
	12025	0.0864	0.1232	0.0965	0.0822	0.0777	0.1492	0.136	0.1391
	120333	0.0863	0.1223	0.0965	0.082	0.0776	0.149	0.1366	0.1386
	120417	0.0864	0.1221	0.0965	0.0816	0.0776	0.1485	0.1369	0.1382
	12.05	0.0861	0.1217	0.0964	0.0816	0.0774	0.1489	0.1371	0.1383
	120583	0.086	0.122	0.0962	0.0816	0.0773	0.1485	0.1374	0.1379
	120667	0.086	0.1223	0.0962	0.0816	0.0774	0.1481	0.1374	0.1376
	12075	0.086	0.1223	0.0964	0.0816	0.0773	0.1476	0.1373	0.1373
	120833	0.086	0.1221	0.0961	0.0814	0.0773	0.1476	0.1369	0.1371
	120917	0.0858	0.122	0.0961	0.0814	0.077	0.1475	0.1368	0.1368
	12.1	0.0858	0.122	0.0959	0.0813	0.0771	0.1475	0.1366	0.1365
	121083	0.0857	0.1218	0.0959	0.0813	0.077	0.147	0.1365	0.1363
	121167	0.0857	0.1218	0.0961	0.0813	0.0768	0.1466	0.1363	0.136
	12125	0.0854	0.1221	0.0958	0.0813	0.0768	0.1464	0.136	0.1359
	121333	0.0854	0.1218	0.0958	0.0811	0.0767	0.1466	0.1359	0.1356
	121417	0.0854	0.1217	0.0958	0.0811	0.0768	0.1461	0.1357	0.1351
	12.15	0.0852	0.1217	0.0954	0.0811	0.0768	0.1458	0.1354	0.135
	121583	0.0851	0.1214	0.0956	0.0809	0.0767	0.1456	0.1354	0.1348
	121667	-0.0436	0.1215	0.0958	0.0809	0.0765	0.1455	0.1351	0.1347
	121667	-0.07	0.1215	0.0956	-0.0431	-0.0404	-0.0375	-0.0321	-0.0463
	12175	-0.075	0.1214	0.0956	-0.0678	-0.0646	-0.0613	-0.0709	-0.0809
	121833	-0.0779	0.1215	-0.0468	-0.0716	-0.0683	-0.0617	-0.0738	-0.0843
	121917	-0.08	-0.0739	-0.0767	-0.0736	-0.071	-0.0619	-0.075	-0.0851
	12.2	-0.0819	-0.0733	-0.0793	-0.0747	-0.0726	-0.062	-0.0752	-0.0848
	122083	-0.0822	-0.0752	-0.0803	-0.0755	-0.0735	-0.0629	-0.0752	-0.0837
	122167	-0.0828	-0.0771	-0.0806	-0.0756	-0.0741	-0.0642	-0.075	-0.0829
	12225	-0.0832	-0.0776	-0.0803	-0.0761	-0.0748	-0.0652	-0.0753	-0.0823
	122333	-0.0831	-0.0779	-0.0802	-0.0761	-0.0748	-0.0665	-0.0753	-0.0819
	122417	-0.0828	-0.0768	-0.0797	-0.0761	-0.075	-0.0672	-0.075	-0.0822
	12.25	-0.0825	-0.0771	-0.0793	-0.0758	-0.0748	-0.0683	-0.0756	-0.0822
	122583	-0.0817	-0.0771	-0.0791	-0.0758	-0.0748	-0.0694	-0.0759	-0.0828
	122667	-0.0809	-0.0768	-0.0794	-0.0759	-0.0747	-0.0703	-0.0762	-0.084
	12275	-0.0802	-0.0765	-0.0791	-0.0758	-0.0741	-0.071	-0.0774	-0.0849
	122833	-0.0794	-0.0758	-0.0791	-0.0756	-0.0739	-0.0716	-0.0787	-0.0867
	122917	-0.0788	-0.0755	-0.0791	-0.0756	-0.0733	-0.0726	-0.0797	-0.0884
	12.3	-0.0779	-0.0748	-0.0791	-0.0755	-0.073	-0.0732	-0.0813	-0.0893
	123083	-0.0773	-0.0745	-0.0791	-0.0753	-0.0726	-0.0739	-0.0828	-0.0904
	123167	-0.0768	-0.0741	-0.0788	-0.0748	-0.0721	-0.0747	-0.084	-0.0912
	12325	-0.0759	-0.0733	-0.0787	-0.075	-0.0716	-0.0752	-0.0849	-0.0915
	123333	-0.0753	-0.0727	-0.0784	-0.0747	-0.0713	-0.0755	-0.0855	-0.0918
	123417	-0.0748	-0.0723	-0.078	-0.0745	-0.071	-0.0764	-0.0858	-0.0919
	12.35	-0.0744	-0.0718	-0.0776	-0.0741	-0.0704	-0.0767	-0.0864	-0.0921
	123583	-0.0738	-0.0713	-0.0774	-0.0739	-0.0701	-0.0773	-0.0864	-0.0924
	123667	-0.0732	-0.0712	-0.0771	-0.0738	-0.0695	-0.078	-0.0864	-0.0925
	12375	-0.073	-0.0707	-0.0767	-0.0733	-0.0694	-0.0788	-0.0864	-0.0925
	123833	-0.0726	-0.0704	-0.0765	-0.073	-0.0689	-0.0796	-0.0866	-0.0932
	123917	-0.0723	-0.0703	-0.0762	-0.073	-0.0687	-0.0797	-0.0869	-0.0935
	12.4	-0.0721	-0.0703	-0.0758	-0.0729	-0.0687	-0.0802	-0.0871	-0.0933
	124083	-0.0718	-0.0698	-0.0755	-0.0723	-0.0683	-0.0811	-0.0871	-0.0941
	124167	-0.0718	-0.0694	-0.0753	-0.0724	-0.0683	-0.0822	-0.0872	-0.0945
	12425	-0.0715	-0.0689	-0.0752	-0.0721	-0.0678	-0.0829	-0.0874	-0.0951
	124333	-0.0715	-0.0686	-0.075	-0.0721	-0.0675	-0.0838	-0.0874	-0.0954
	124417	-0.0712	-0.0683	-0.0748	-0.0719	-0.0675	-0.0849	-0.0877	-0.0958
	12.45	-0.0709	-0.0681	-0.0747	-0.0718	-0.0671	-0.0858	-0.0878	-0.0961
	124583	-0.0707	-0.0674	-0.0747	-0.0719	-0.0669	-0.0869	-0.088	-0.0962
	124667	-0.0707	-0.0671	-0.0747	-0.0718	-0.0668	-0.0883	-0.0881	-0.0968
	12475	-0.0706	-0.0668	-0.0745	-0.0716	-0.0668	-0.0893	-0.0883	-0.0971
	124833	-0.0706	-0.0669	-0.0747	-0.0715	-0.0666	-0.0901	-0.0886	-0.098
	124917	-0.0707	-0.0666	-0.0747	-0.0718	-0.0665	-0.0912	-0.0887	-0.0983
	12.5	-0.0706	-0.0665	-0.0747	-0.0715	-0.0665	-0.0919	-0.089	-0.0993
	125083	-0.0706	-0.0663	-0.0748	-0.0715	-0.0663	-0.0927	-0.0895	-0.1
	125167	-0.0707	-0.0658	-0.0748	-0.0718	-0.0663	-0.0933	-0.0896	-0.1006
	12525	-0.0709	-0.0658	-0.075	-0.0715	-0.0665	-0.0938	-0.09	-0.1019
	125333	-0.0709	-0.0655	-0.0752	-0.0716	-0.0663	-0.0948	-0.0904	-0.1028
	125417	-0.0712	-0.0655	-0.0752	-0.0718	-0.0663	-0.0956	-0.091	-0.1038
	12.55	-0.0712	-0.0655	-0.0756	-0.0718	-0.0661	-0.0965	-0.0915	-0.1052
	125583	-0.0712	-0.0655	-0.0761	-0.0719	-0.0661	-0.0976	-0.0919	-0.1063
	125667	-0.0712	-0.0655	-0.0764	-0.0719	-0.0661	-0.099	-0.0924	-0.1072
	12575	-0.0713	-0.0655	-0.0767	-0.0719	-0.066	-0.1	-0.0932	-0.1084
	125833	-0.0712	-0.0655	-0.0768	-0.0721	-0.0661	-0.1011	-0.0935	-0.1095
	125917	-0.0713	-0.0655	-0.0773	-0.0723	-0.0661	-0.1025	-0.0941	-0.1102
	12.6	-0.0716	-0.0657	-0.0777	-0.0723	-0.066	-0.1032	-0.0947	-0.1113
	126083	-0.0716	-0.0657	-0.078	-0.0724	-0.066	-0.1048	-0.095	-0.1122
	126167	-0.0721	-0.0657	-0.0785	-0.0724	-0.0661	-0.1055	-0.0956	-0.1128
	12625	-0.0721	-0.0661	-0.079	-0.0726	-0.066	-0.1063	-0.0961	-0.1135
	126333	-0.0721	-0.0658	-0.0796	-0.0726	-0.0661	-0.1073	-0.0968	-0.1142
	126417	-0.0723	-0.066	-0.0803	-0.0729	-0.066	-0.1086	-0.0973	-0.1153
	12.65	-0.0724	-0.0661	-0.0811	-0.0729	-0.0663	-0.1093	-0.0977	-0.1157
	126583	-0.0726	-0.0666	-0.0817	-0.0729	-0.0663	-0.1106	-0.0979	-0.1165
	126667	-0.0726	-0.0665	-0.0823	-0.0733	-0.066	-0.1113	-0.0983	-0.1173
	12675	-0.0729	-0.0671	-0.0828	-0.0733	-0.0663	-0.1122	-0.0988	-0.1176
	126833	-0.0727	-0.0671	-0.084	-0.0735	-0.0663	-0.1133	-0.0993	-0.1182
	126917	-0.0729	-0.0671	-0.0848	-0.0738	-0.0661	-0.1141	-0.1	-0.1191
	12.7	-0.0733	-0.0674	-0.0854	-0.0739	-0.0665	-0.1147	-0.1005	-0.12
	127083	-0.0733	-0.0674	-0.0866	-0.0738	-0.0665	-0.1159	-0.1006	-0.1206
	127167	-0.0735	-0.0672	-0.0875	-0.0739	-0.0663	-0.117	-0.1012	-0.1215
	12725	-0.0738	-0.0674	-0.0884	-0.0742	-0.0665	-0.1177	-0.1017	-0.1226
	127333	-0.0741	-0.0677	-0.0893	-0.0742	-0.0665	-0.1192	-0.1022	-0.1235
	127417	-0.0741	-0.0674	-0.0903	-0.0745	-0.0665	-0.12	-0.1025	-0.1246
	12.75	-0.0741	-0.0675	-0.0909	-0.0747	-0.0665	-0.1208	-0.1029	-0.1258
	127583	-0.0744	-0.0675	-0.0913	-0.0745	-0.0666	-0.1217	-0.1031	-0.127
	127667	-0.0745	-0.0675	-0.0918	-0.0745	-0.0666	-0.1226	-0.1034	-0.1279
	12775	-0.075	-0.0678	-0.0922	-0.0747	-0.0665	-0.1237	-0.1041	-0.1298
	127833	-0.075	-0.0678	-0.0922	-0.0747	-0.0668	-0.1246	-0.1049	-0.1312
	127917	-0.075	-0.068	-0.0924	-0.0748	-0.0665	-0.126	-0.1052	-0.1328
	12.8	-0.0752	-0.068	-0.0927	-0.0748	-0.0665	-0.127	-0.1058	-0.1347
	128083	-0.0752	-0.0681	-0.0927	-0.075	-0.0666	-0.1281	-0.1064	-0.1368
	128167	-0.075	-0.0684	-0.0927	-0.0748	-0.0665	-0.1293	-0.107	-0.1386
	12825	-0.0753	-0.0684	-0.093	-0.0748	-0.0666	-0.1302	-0.1073	-0.1408
	128333	-0.0753	-0.0684	-0.0929	-0.075	-0.0668	-0.1316	-0.1086	-0.1431
	128417	-0.0753	-0.0687	-0.0929	-0.075	-0.0665	-0.1328	-0.1092	-0.1452
	12.85	-0.0752	-0.0687	-0.0927	-0.0748	-0.0665	-0.1344	-0.1099	-0.1475
	128583	-0.0755	-0.0687	-0.0929	-0.075	-0.0665	-0.1357	-0.1107	-0.149
	128667	-0.0752	-0.0689	-0.0925	-0.075	-0.0665	-0.1373	-0.1116	-0.1502
	12875	-0.0753	-0.0689	-0.0927	-0.0748	-0.0666	-0.1386	-0.1124	-0.1511
	128833	-0.0753	-0.0692	-0.0927	-0.0748	-0.0665	-0.1402	-0.1135	-0.1516
	128917	-0.0753	-0.0692	-0.0927	-0.0748	-0.0666	-0.1412	-0.1148	-0.1516
	12.9	-0.0752	-0.0692	-0.0925	-0.075	-0.0666	-0.1427	-0.1157	-0.1518
	129083	-0.0752	-0.0694	-0.0925	-0.0747	-0.0665	-0.1437	-0.1171	-0.1514
	129167	-0.0753	-0.0695	-0.0924	-0.0748	-0.0666	-0.1446	-0.1182	-0.1514
	12925	-0.075	-0.0697	-0.0924	-0.0747	-0.0665	-0.1455	-0.1196	-0.1511
	129333	-0.075	-0.0698	-0.0922	-0.0745	-0.0666	-0.1461	-0.1211	-0.151
	129417	-0.075	-0.0697	-0.0922	-0.0745	-0.0665	-0.1467	-0.1226	-0.1507
	12.95	-0.075	-0.0698	-0.0921	-0.0744	-0.0661	-0.147	-0.124	-0.1508
	129583	-0.0752	-0.0698	-0.0921	-0.0744	-0.0663	-0.147	-0.1258	-0.1505
	129667	-0.0752	-0.0698	-0.0919	-0.0745	-0.0663	-0.1472	-0.1269	-0.1505
	12975	-0.075	-0.0697	-0.0919	-0.0742	-0.0665	-0.1469	-0.1286	-0.1501
	129833	-0.0748	-0.07	-0.0919	-0.0744	-0.0663	-0.1466	-0.1299	-0.1499
	129917	-0.075	-0.07	-0.0918	-0.0744	-0.066	-0.1464	-0.131	-0.1498
	13	-0.0747	-0.07	-0.0919	-0.0742	-0.0661	-0.1463	-0.1321	-0.1495
	130083	-0.0747	-0.07	-0.0916	-0.0742	-0.0658	-0.1456	-0.133	-0.149
	130167	-0.0747	-0.0697	-0.0918	-0.0741	-0.066	-0.1456	-0.1339	-0.1489
	13025	-0.0747	-0.07	-0.0915	-0.0742	-0.0661	-0.1455	-0.1344	-0.1487
	130333	-0.0747	-0.0697	-0.0915	-0.0741	-0.066	-0.145	-0.1348	-0.1485
	130417	-0.0745	-0.07	-0.0916	-0.0741	-0.0658	-0.1447	-0.1353	-0.1484
	13.05	-0.0745	-0.0698	-0.0913	-0.0741	-0.0658	-0.1441	-0.1353	-0.1482
	130583	-0.0745	-0.0698	-0.0913	-0.0739	-0.0658	-0.1443	-0.1351	-0.1481
	130667	-0.0744	-0.0698	-0.0913	-0.0738	-0.0658	-0.1438	-0.135	-0.1478
	13075	-0.0742	-0.0698	-0.0915	-0.0739	-0.0658	-0.1437	-0.1351	-0.1476
	130833	-0.0744	-0.0697	-0.0912	-0.0739	-0.0658	-0.1435	-0.135	-0.1478
	130917	-0.0742	-0.0698	-0.0913	-0.0736	-0.0657	-0.1431	-0.1345	-0.1475
	13.1	-0.0741	-0.0698	-0.0912	-0.0736	-0.0657	-0.1431	-0.1344	-0.1475
	131083	-0.0741	-0.0697	-0.0912	-0.0735	-0.0657	-0.1424	-0.1342	-0.147
	131167	-0.0739	-0.0694	-0.091	-0.0733	-0.0657	-0.142	-0.1339	-0.1472
	13125	-0.0739	-0.0695	-0.091	-0.0736	-0.0655	-0.1418	-0.1336	-0.1466
	131333	-0.0739	-0.0698	-0.0912	-0.0735	-0.0657	-0.1417	-0.1336	-0.1464
	131417	-0.0738	-0.0698	-0.091	-0.0733	-0.0654	-0.1414	-0.1334	-0.1461
	13.15	-0.0741	-0.07	-0.0909	-0.0733	-0.0652	-0.1412	-0.1331	-0.146
	131583	-0.0736	-0.0701	-0.0909	-0.0732	-0.0654	-0.1409	-0.1331	-0.146
	131667	0.0307	-0.0698	-0.0909	-0.0732	-0.0654	-0.1405	-0.1324	-0.1453
	131667	0.0567	-0.0697	-0.0906	0.0333	0.0282	0.0381	0.0385	0.0443
	13175	0.0619	-0.0701	-0.091	0.0582	0.0527	0.0733	0.0761	0.0817
	131833	0.0652	-0.0697	0.0466	0.0626	0.0562	0.0764	0.0802	0.0854
	131917	0.0681	0.0326	0.0745	0.0649	0.0585	0.0784	0.0814	0.0863
	13.2	0.0698	0.0561	0.0784	0.0669	0.06	0.0793	0.0817	0.086
	132083	0.0713	0.06	0.0802	0.068	0.0611	0.0806	0.0814	0.0855
	132167	0.0726	0.0631	0.0813	0.0689	0.062	0.0811	0.0806	0.0846
	13225	0.0736	0.0654	0.0814	0.0698	0.0626	0.0819	0.0796	0.0842
	132333	0.0741	0.0674	0.0816	0.0701	0.0632	0.0822	0.079	0.0837
	132417	0.0744	0.0686	0.0816	0.0704	0.0636	0.0825	0.0787	0.0838
	13.25	0.0747	0.0698	0.0813	0.0706	0.0639	0.0828	0.0784	0.0838
	132583	0.0747	0.0706	0.0811	0.0707	0.0642	0.0829	0.0782	0.0837
	132667	0.0747	0.0712	0.0808	0.0709	0.0643	0.0831	0.0782	0.0843
	13275	0.0745	0.0716	0.0809	0.0707	0.0646	0.0834	0.0782	0.0852
	132833	0.0744	0.0719	0.0805	0.071	0.0648	0.0842	0.0785	0.0863
	132917	0.0744	0.0721	0.08	0.0709	0.0648	0.0845	0.079	0.0875
	13.3	0.0739	0.0724	0.08	0.0706	0.0649	0.0854	0.0796	0.0884
	133083	0.0738	0.0727	0.0799	0.0706	0.0651	0.0861	0.0805	0.089
	133167	0.0735	0.0733	0.0794	0.0703	0.0652	0.0863	0.0806	0.0896
	13325	0.0729	0.0732	0.079	0.0703	0.0649	0.0869	0.0813	0.09
	133333	0.073	0.0735	0.0788	0.0703	0.0649	0.0875	0.0817	0.0904
	133417	0.0729	0.0735	0.0785	0.0698	0.0649	0.0878	0.0819	0.0906
	13.35	0.0724	0.0739	0.078	0.07	0.0649	0.0886	0.0819	0.0907
	133583	0.0723	0.0742	0.0779	0.0695	0.0649	0.0889	0.0822	0.091
	133667	0.0721	0.075	0.0776	0.0692	0.0651	0.0893	0.0823	0.0909
	13375	0.0718	0.0752	0.0774	0.0692	0.0649	0.0903	0.0825	0.091
	133833	0.0713	0.0753	0.077	0.069	0.0648	0.091	0.0823	0.091
	133917	0.0713	0.0753	0.0765	0.0689	0.0648	0.0915	0.0825	0.0912
	13.4	0.0712	0.0753	0.0764	0.0689	0.0649	0.0918	0.0822	0.0915
	134083	0.0709	0.0756	0.0761	0.0686	0.0646	0.0924	0.0822	0.0916
	134167	0.071	0.0756	0.0759	0.0684	0.0646	0.0929	0.0823	0.0913
	13425	0.0707	0.0755	0.0758	0.0683	0.0646	0.0935	0.0825	0.0916
	134333	0.0706	0.0756	0.0756	0.0683	0.0648	0.0938	0.0822	0.0918
	134417	0.0707	0.0761	0.0755	0.0681	0.0643	0.0939	0.0823	0.0918
	13.45	0.0704	0.0765	0.0755	0.068	0.0646	0.0945	0.0825	0.0921
	134583	0.0706	0.0779	0.0753	0.068	0.0645	0.0948	0.0826	0.0922
	134667	0.0706	0.0782	0.0753	0.0683	0.0645	0.0954	0.0828	0.0925
	13475	0.0706	0.0785	0.0753	0.0678	0.0645	0.0961	0.0829	0.0925
	134833	0.0706	0.0787	0.075	0.068	0.0646	0.0967	0.0831	0.093
	134917	0.0704	0.0825	0.0752	0.068	0.0645	0.0971	0.0831	0.0932
	13.5	0.0706	0.084	0.0753	0.068	0.0645	0.0979	0.0835	0.0936
	135083	0.0706	0.0845	0.0752	0.068	0.0646	0.0986	0.0838	0.0939
	135167	0.0707	0.0849	0.0752	0.068	0.0645	0.0996	0.0842	0.0942
	13525	0.0707	0.0858	0.0753	0.0683	0.0645	0.1003	0.0845	0.0945
	135333	0.0706	0.0871	0.0755	0.0681	0.0646	0.1014	0.0849	0.0948
	135417	0.0707	0.0886	0.0756	0.0683	0.0648	0.1028	0.0851	0.0953
	13.55	0.0709	0.0938	0.0758	0.0684	0.0648	0.1038	0.0857	0.0958
	135583	0.071	0.099	0.0758	0.0686	0.0649	0.1049	0.0861	0.0962
	135667	0.0712	0.0996	0.0759	0.0687	0.0649	0.106	0.0864	0.0967
	13575	0.0712	0.0994	0.0762	0.0687	0.0649	0.1073	0.0869	0.0968
	135833	0.0713	0.0994	0.0762	0.0689	0.0651	0.1084	0.0874	0.0976
	135917	0.0715	0.0999	0.0765	0.069	0.0652	0.1093	0.0878	0.0979
	13.6	0.0718	0.0999	0.0765	0.0692	0.0657	0.1101	0.0881	0.0985
	136083	0.0718	0.104	0.077	0.0692	0.0658	0.1107	0.0886	0.0988
	136167	0.0719	0.1058	0.0774	0.0694	0.066	0.1113	0.089	0.0994
	13625	0.0721	0.1063	0.0777	0.0694	0.0655	0.1122	0.0895	0.0997
	136333	0.0726	0.1066	0.078	0.0698	0.0661	0.1128	0.0898	0.1002
	136417	0.0727	0.1066	0.0785	0.07	0.0663	0.113	0.0906	0.1008
	13.65	0.073	0.1066	0.079	0.07	0.0665	0.1141	0.0912	0.1012
	136583	0.0729	0.1073	0.0791	0.0704	0.0666	0.1142	0.0913	0.1019
	136667	0.0735	0.1073	0.0797	0.0704	0.0666	0.115	0.0918	0.102
	13675	0.0739	0.1073	0.0803	0.0706	0.0669	0.1154	0.0922	0.1023
	136833	0.0741	0.1078	0.0808	0.071	0.0669	0.1162	0.0925	0.1028
	136917	0.0742	0.108	0.0816	0.071	0.0672	0.1165	0.0932	0.1034
	13.7	0.0745	0.1084	0.082	0.071	0.0672	0.1173	0.0935	0.1037
	137083	0.0748	0.1083	0.0825	0.071	0.0675	0.1179	0.0939	0.1043
	137167	0.0753	0.1087	0.0828	0.0713	0.0675	0.1182	0.0947	0.1048
	13725	0.0755	0.1093	0.0834	0.0718	0.0675	0.1189	0.0948	0.1052
	137333	0.0758	0.109	0.0837	0.0718	0.0678	0.1199	0.0953	0.106
	137417	0.0759	0.1093	0.0842	0.0718	0.068	0.1208	0.0959	0.106
	13.75	0.0762	0.1093	0.0843	0.0719	0.0683	0.1215	0.0962	0.1067
	137583	0.0764	0.1092	0.0846	0.0723	0.0684	0.122	0.0968	0.1072
	137667	0.0764	0.1095	0.0848	0.0723	0.0684	0.1234	0.097	0.108
	13775	0.0765	0.1101	0.0851	0.0724	0.0689	0.1241	0.098	0.1087
	137833	0.0768	0.1104	0.0851	0.0726	0.0689	0.1254	0.098	0.1092
	137917	0.0768	0.111	0.0851	0.0727	0.0689	0.1263	0.0986	0.1101
	13.8	0.0768	0.1109	0.0852	0.0727	0.069	0.127	0.0991	0.1109
	138083	0.0768	0.111	0.0852	0.0729	0.0692	0.1283	0.0993	0.1121
	138167	0.0771	0.1109	0.0855	0.0727	0.0689	0.1299	0.1	0.1128
	13825	0.0773	0.111	0.0855	0.0729	0.0692	0.1315	0.1002	0.1139
	138333	0.077	0.111	0.0855	0.0729	0.069	0.1334	0.1011	0.1153
	138417	0.077	0.1109	0.0855	0.0729	0.0692	0.1354	0.1015	0.1165
	13.85	0.077	0.1112	0.0857	0.073	0.0694	0.1376	0.1017	0.1177
	138583	0.077	0.1113	0.0855	0.0729	0.0692	0.1395	0.1023	0.1194
	138667	0.077	0.1113	0.0854	0.0732	0.0694	0.1414	0.1029	0.1212
	13875	0.077	0.1113	0.0855	0.0729	0.0692	0.1426	0.1037	0.1232
	138833	0.077	0.1112	0.0854	0.0729	0.0694	0.144	0.1038	0.1254
	138917	0.0765	0.1116	0.0855	0.073	0.0692	0.1449	0.1048	0.1273
	13.9	0.077	0.1119	0.0854	0.0732	0.0694	0.1447	0.1054	0.1292
	139083	0.0767	0.1125	0.0854	0.0729	0.0694	0.1453	0.1063	0.1308
	139167	0.0768	0.1164	0.0854	0.073	0.0692	0.1463	0.107	0.1325
	13925	0.0765	0.1165	0.0851	0.0727	0.0694	0.1467	0.108	0.1336
	139333	0.0764	0.1165	0.0852	0.0729	0.0692	0.1473	0.109	0.1345
	139417	0.0767	0.1165	0.0852	0.0729	0.0692	0.1475	0.1098	0.1351
	13.95	0.0767	0.1167	0.0849	0.0729	0.0694	0.1473	0.1113	0.1359
	139583	0.0767	0.1164	0.0851	0.0726	0.0692	0.1472	0.1124	0.1363
	139667	0.0764	0.1165	0.0849	0.0727	0.0692	0.1476	0.1138	0.1365
	13975	0.0764	0.1164	0.0849	0.0727	0.069	0.1475	0.1153	0.1365
	139833	0.0764	0.1162	0.0851	0.0726	0.0692	0.1472	0.1167	0.1363
	139917	0.0764	0.1165	0.0849	0.0726	0.069	0.147	0.1186	0.1363
	14	0.0762	0.1167	0.0849	0.0726	0.0689	0.1469	0.1203	0.1362
	140083	0.0762	0.1165	0.0849	0.0726	0.069	0.1466	0.1217	0.136
	140167	0.0762	0.1167	0.0848	0.0726	0.069	0.1466	0.1235	0.1356
	14025	0.0761	0.1162	0.0846	0.0724	0.069	0.1463	0.1255	0.1356
	140333	0.0762	0.1167	0.0845	0.0726	0.069	0.1461	0.1267	0.1351
	140417	0.0759	0.1188	0.0848	0.0724	0.0686	0.1456	0.1276	0.135
	14.05	0.0759	0.1189	0.0845	0.0724	0.0689	0.1455	0.1292	0.135
	140583	0.0761	0.1185	0.0845	0.0723	0.0687	0.1452	0.1299	0.1345
	140667	0.0759	0.1188	0.0845	0.0723	0.0686	0.1449	0.1312	0.1344
	14075	0.0758	0.1186	0.0843	0.0723	0.0686	0.145	0.1318	0.1341
	140833	0.0758	0.1188	0.0842	0.0723	0.0683	0.1446	0.1325	0.1341
	140917	0.0758	0.1192	0.084	0.0721	0.0683	0.1446	0.1325	0.1337
	14.1	0.0758	0.1191	0.0838	0.0719	0.0683	0.1444	0.1327	0.1336
	141083	0.0756	0.1192	0.0843	0.0719	0.0683	0.1441	0.1327	0.1333
	141167	0.0756	0.1191	0.0838	0.0718	0.0683	0.144	0.1325	0.133
	14125	0.0756	0.1189	0.0838	0.0718	0.0683	0.144	0.1324	0.1328
	141333	0.0755	0.1189	0.0838	0.0718	0.0681	0.1435	0.1324	0.1327
	141417	0.0756	0.1191	0.0837	0.0718	0.068	0.1434	0.1319	0.1324
	14.15	0.0755	0.1189	0.0837	0.0719	0.068	0.1432	0.1319	0.1325
	141583	0.0753	0.1186	0.0837	0.0716	0.0681	0.1431	0.1319	0.1319
	141667	-0.0335	0.1188	0.0837	0.0718	0.068	0.1427	0.1316	0.1318
	141667	-0.0594	0.1191	0.0834	-0.0344	-0.032	-0.0367	-0.032	-0.0442
	14175	-0.0646	0.1191	0.0834	-0.0582	-0.0559	-0.0603	-0.0718	-0.0794
	141833	-0.0677	0.1185	-0.0382	-0.0622	-0.06	-0.062	-0.0744	-0.0828
	141917	-0.0698	-0.0721	-0.0661	-0.0646	-0.0626	-0.0629	-0.0756	-0.0842
	14.2	-0.0716	-0.0739	-0.0706	-0.066	-0.0643	-0.0643	-0.0762	-0.084
	142083	-0.0729	-0.0724	-0.0726	-0.0672	-0.0654	-0.0645	-0.0767	-0.0837
	142167	-0.0736	-0.0726	-0.0739	-0.0681	-0.0658	-0.0655	-0.0762	-0.0834
	14225	-0.0739	-0.0739	-0.0745	-0.0689	-0.0665	-0.0663	-0.0761	-0.0825
	142333	-0.0744	-0.0745	-0.0747	-0.0692	-0.0666	-0.0672	-0.0761	-0.0826
	142417	-0.0747	-0.0744	-0.075	-0.0695	-0.0669	-0.068	-0.0761	-0.0826
	14.25	-0.0747	-0.0742	-0.0747	-0.0697	-0.0671	-0.0687	-0.0761	-0.0828
	142583	-0.0744	-0.0733	-0.0747	-0.0698	-0.0671	-0.0695	-0.0764	-0.0832
	142667	-0.0739	-0.073	-0.0745	-0.0695	-0.0669	-0.07	-0.077	-0.084
	14275	-0.0739	-0.0729	-0.0744	-0.0697	-0.0669	-0.0706	-0.0776	-0.0849
	142833	-0.0738	-0.0724	-0.0742	-0.0697	-0.0666	-0.0715	-0.0787	-0.086
	142917	-0.0735	-0.0726	-0.0741	-0.0697	-0.0663	-0.0718	-0.0796	-0.0875
	14.3	-0.0732	-0.0721	-0.0741	-0.0695	-0.0661	-0.0719	-0.0811	-0.0884
	143083	-0.0729	-0.0716	-0.0738	-0.0694	-0.066	-0.0727	-0.0823	-0.0893
	143167	-0.0724	-0.0713	-0.0735	-0.069	-0.066	-0.0733	-0.0831	-0.09
	14325	-0.0721	-0.0709	-0.0735	-0.069	-0.0655	-0.0739	-0.0842	-0.0904
	143333	-0.0721	-0.0707	-0.0732	-0.0689	-0.0652	-0.0745	-0.0846	-0.0907
	143417	-0.0718	-0.0703	-0.0729	-0.069	-0.0649	-0.075	-0.0851	-0.0909
	14.35	-0.0715	-0.0687	-0.0726	-0.0686	-0.0649	-0.0755	-0.0852	-0.0907
	143583	-0.071	-0.0678	-0.0723	-0.0687	-0.0646	-0.0762	-0.0854	-0.0909
	143667	-0.0709	-0.0674	-0.0719	-0.0684	-0.0645	-0.0767	-0.0854	-0.0909
	14375	-0.0704	-0.0672	-0.0718	-0.0681	-0.0643	-0.0774	-0.0855	-0.091
	143833	-0.0703	-0.0671	-0.0718	-0.0681	-0.0639	-0.078	-0.0854	-0.0915
	143917	-0.0701	-0.0663	-0.0715	-0.0677	-0.0637	-0.0787	-0.0854	-0.0916
	14.4	-0.0697	-0.0661	-0.0713	-0.0678	-0.0636	-0.0791	-0.0854	-0.0916
	144083	-0.0695	-0.0657	-0.0709	-0.0678	-0.0632	-0.0799	-0.0854	-0.0919
	144167	-0.0692	-0.0655	-0.0709	-0.0675	-0.0632	-0.0808	-0.0854	-0.0921
	14425	-0.069	-0.0652	-0.0709	-0.0675	-0.0632	-0.0817	-0.0854	-0.0922
	144333	-0.069	-0.0648	-0.0704	-0.0675	-0.0631	-0.0828	-0.0854	-0.0924
	144417	-0.0686	-0.0648	-0.0706	-0.0672	-0.0628	-0.0834	-0.0855	-0.0925
	14.45	-0.0686	-0.0646	-0.0704	-0.0674	-0.0628	-0.0846	-0.0858	-0.0927
	144583	-0.0681	-0.0645	-0.0703	-0.0672	-0.0625	-0.0854	-0.0857	-0.0935
	144667	-0.0681	-0.064	-0.07	-0.0671	-0.0623	-0.086	-0.0858	-0.0936
	14475	-0.068	-0.0642	-0.07	-0.0672	-0.0623	-0.0861	-0.086	-0.0938
	144833	-0.0678	-0.0639	-0.07	-0.0669	-0.0622	-0.0872	-0.086	-0.0944
	144917	-0.0677	-0.0637	-0.0703	-0.0671	-0.062	-0.088	-0.0864	-0.0945
	14.5	-0.0675	-0.0636	-0.0703	-0.0669	-0.0619	-0.0886	-0.0866	-0.0953
	145083	-0.0677	-0.0634	-0.0701	-0.0671	-0.062	-0.089	-0.0867	-0.0956
	145167	-0.0675	-0.0631	-0.0703	-0.0669	-0.0617	-0.0896	-0.0872	-0.0964
	14525	-0.0672	-0.0631	-0.0703	-0.0669	-0.0617	-0.0901	-0.0875	-0.097
	145333	-0.0672	-0.0631	-0.0703	-0.0669	-0.0617	-0.0907	-0.0877	-0.0977
	145417	-0.0671	-0.0629	-0.0704	-0.0671	-0.0617	-0.0916	-0.088	-0.0982
	14.55	-0.0672	-0.0626	-0.0704	-0.0669	-0.0616	-0.0929	-0.0883	-0.0993
	145583	-0.0672	-0.0628	-0.0706	-0.0668	-0.0614	-0.0936	-0.0887	-0.1
	145667	-0.0669	-0.0626	-0.0707	-0.0669	-0.0616	-0.0945	-0.0892	-0.1006
	14575	-0.0672	-0.0626	-0.0712	-0.0668	-0.0614	-0.0954	-0.0893	-0.1017
	145833	-0.0669	-0.0625	-0.0713	-0.0669	-0.0613	-0.0964	-0.0896	-0.1025
	145917	-0.0671	-0.0625	-0.0713	-0.0668	-0.0613	-0.0974	-0.0898	-0.1031
	14.6	-0.0671	-0.0623	-0.0715	-0.0668	-0.0613	-0.0982	-0.0904	-0.1038
	146083	-0.0672	-0.0625	-0.0715	-0.0668	-0.0613	-0.0991	-0.0907	-0.1044
	146167	-0.0669	-0.0623	-0.0718	-0.0668	-0.0613	-0.0997	-0.0912	-0.1052
	14625	-0.0671	-0.0622	-0.0721	-0.0669	-0.0611	-0.1005	-0.0915	-0.1057
	146333	-0.0671	-0.0623	-0.0724	-0.0669	-0.061	-0.1014	-0.0918	-0.1063
	146417	-0.0672	-0.0622	-0.0727	-0.0671	-0.0611	-0.1022	-0.0919	-0.1069
	14.65	-0.0671	-0.0623	-0.073	-0.0671	-0.061	-0.1028	-0.0925	-0.1072
	146583	-0.0672	-0.0622	-0.0735	-0.0671	-0.0613	-0.1032	-0.0929	-0.1078
	146667	-0.0674	-0.062	-0.0736	-0.0671	-0.061	-0.1041	-0.0932	-0.1084
	14675	-0.0674	-0.0617	-0.0739	-0.0669	-0.061	-0.1048	-0.0936	-0.1089
	146833	-0.0672	-0.0617	-0.0744	-0.0671	-0.0607	-0.1052	-0.0941	-0.1096
	146917	-0.0674	-0.0614	-0.0745	-0.0671	-0.0611	-0.106	-0.0945	-0.1102
	14.7	-0.0674	-0.0611	-0.0748	-0.0671	-0.061	-0.1067	-0.0948	-0.1107
	147083	-0.0672	-0.061	-0.0755	-0.0674	-0.061	-0.1073	-0.0951	-0.1113
	147167	-0.0672	-0.0608	-0.0762	-0.0672	-0.0608	-0.108	-0.0956	-0.1119
	14725	-0.0675	-0.0607	-0.0765	-0.0672	-0.0607	-0.1087	-0.0959	-0.1125
	147333	-0.0675	-0.0605	-0.077	-0.0671	-0.0607	-0.1093	-0.0965	-0.1133
	147417	-0.0674	-0.0605	-0.0773	-0.0672	-0.0608	-0.1101	-0.0968	-0.1141
	14.75	-0.0675	-0.0603	-0.0777	-0.0674	-0.0603	-0.1107	-0.0971	-0.1147
	147583	-0.0677	-0.0603	-0.078	-0.0671	-0.0608	-0.1113	-0.0976	-0.1156
	147667	-0.0672	-0.0603	-0.0784	-0.0674	-0.0608	-0.1121	-0.098	-0.1162
	14775	-0.0675	-0.0602	-0.0787	-0.0674	-0.0605	-0.113	-0.0983	-0.1173
	147833	-0.0677	-0.06	-0.0791	-0.0674	-0.0608	-0.1138	-0.0986	-0.118
	147917	-0.0675	-0.0602	-0.0793	-0.0675	-0.0605	-0.1142	-0.0993	-0.1194
	14.8	-0.0675	-0.06	-0.0796	-0.0675	-0.0605	-0.115	-0.0996	-0.1206
	148083	-0.0675	-0.0602	-0.0794	-0.0674	-0.0607	-0.1159	-0.1002	-0.1218
	148167	-0.0677	-0.06	-0.0799	-0.0672	-0.0603	-0.1168	-0.1005	-0.1234
	14825	-0.0677	-0.0602	-0.0799	-0.0677	-0.0605	-0.1179	-0.1011	-0.1247
	148333	-0.0672	-0.0603	-0.0802	-0.0674	-0.0605	-0.1185	-0.1019	-0.1267
	148417	-0.0677	-0.0603	-0.0802	-0.0675	-0.0607	-0.1197	-0.1023	-0.1286
	14.85	-0.0677	-0.0603	-0.0803	-0.0675	-0.0603	-0.1208	-0.1026	-0.1305
	148583	-0.0675	-0.0603	-0.0803	-0.0674	-0.0605	-0.1218	-0.1034	-0.1327
	148667	-0.0677	-0.0605	-0.0803	-0.0674	-0.0607	-0.1229	-0.104	-0.1351
	14875	-0.0677	-0.0605	-0.0803	-0.0675	-0.0605	-0.1244	-0.1049	-0.1376
	148833	-0.0675	-0.0605	-0.0805	-0.0674	-0.0605	-0.1255	-0.1055	-0.1402
	148917	-0.0675	-0.0608	-0.0806	-0.0675	-0.0605	-0.1272	-0.1063	-0.1423
	14.9	-0.0677	-0.061	-0.0805	-0.0672	-0.0605	-0.1287	-0.107	-0.1443
	149083	-0.0677	-0.061	-0.0805	-0.0672	-0.0603	-0.1305	-0.1083	-0.1455
	149167	-0.0677	-0.0611	-0.0803	-0.0675	-0.0603	-0.1319	-0.1093	-0.1466
	14925	-0.0677	-0.0611	-0.0805	-0.0674	-0.0602	-0.1336	-0.1106	-0.1469
	149333	-0.0674	-0.0611	-0.0803	-0.0674	-0.0603	-0.1351	-0.1118	-0.1472
	149417	-0.0677	-0.0614	-0.0803	-0.0675	-0.0603	-0.1366	-0.1128	-0.1473
	14.95	-0.0677	-0.0613	-0.0803	-0.0675	-0.0605	-0.1377	-0.1145	-0.147
	149583	-0.0675	-0.0614	-0.0803	-0.0675	-0.0603	-0.1386	-0.1162	-0.147
	149667	-0.0677	-0.0614	-0.0803	-0.0674	-0.0603	-0.1394	-0.1179	-0.1467
	14975	-0.0677	-0.0614	-0.0805	-0.0672	-0.0602	-0.1392	-0.1197	-0.1466
	149833	-0.0677	-0.0616	-0.0803	-0.0672	-0.0602	-0.1403	-0.1217	-0.1466
	149917	-0.0675	-0.0619	-0.0805	-0.0674	-0.0602	-0.1406	-0.1232	-0.1461
	15	-0.0677	-0.0617	-0.0803	-0.0674	-0.0602	-0.1412	-0.1247	-0.1458
	150083	-0.0677	-0.062	-0.0802	-0.0672	-0.06	-0.1411	-0.1261	-0.1455
	150167	-0.0675	-0.062	-0.0803	-0.0674	-0.06	-0.1411	-0.1273	-0.1455
	15025	-0.0677	-0.062	-0.08	-0.0672	-0.0602	-0.1408	-0.1284	-0.1453
	150333	-0.0675	-0.062	-0.0799	-0.0671	-0.06	-0.1405	-0.1296	-0.1453
	150417	-0.0677	-0.062	-0.08	-0.0672	-0.06	-0.1405	-0.1304	-0.145
	15.05	-0.0675	-0.062	-0.0802	-0.0674	-0.06	-0.14	-0.1312	-0.1449
	150583	-0.0677	-0.0622	-0.0802	-0.0671	-0.0599	-0.1397	-0.1313	-0.1446
	150667	-0.0675	-0.062	-0.08	-0.0671	-0.06	-0.1395	-0.1313	-0.1443
	15075	-0.0674	-0.0622	-0.0799	-0.0671	-0.0599	-0.1391	-0.1316	-0.1443
	150833	-0.0675	-0.0622	-0.0799	-0.0671	-0.0599	-0.1386	-0.1315	-0.144
	150917	-0.0677	-0.0628	-0.08	-0.0671	-0.0599	-0.1386	-0.1315	-0.1438
	15.1	-0.0674	-0.0628	-0.08	-0.0672	-0.0599	-0.1383	-0.131	-0.1435
	151083	-0.0674	-0.0628	-0.0796	-0.0671	-0.0596	-0.1377	-0.1312	-0.1434
	151167	-0.0672	-0.0623	-0.0794	-0.0668	-0.0599	-0.1377	-0.1307	-0.1431
	15125	-0.0672	-0.0622	-0.0799	-0.0669	-0.0597	-0.1376	-0.131	-0.1426
	151333	-0.0674	-0.0623	-0.0797	-0.0669	-0.0597	-0.1374	-0.1307	-0.142
	151417	-0.0672	-0.0623	-0.0796	-0.0668	-0.0597	-0.1368	-0.1305	-0.142
	15.15	-0.0672	-0.0623	-0.0797	-0.0669	-0.0596	-0.1369	-0.1302	-0.1414
	151583	-0.0672	-0.0625	-0.0796	-0.0665	-0.0597	-0.1363	-0.1299	-0.1417
	151667	0.0228	-0.0623	-0.0794	-0.0666	-0.0596	-0.1362	-0.1301	-0.1414
	151667	0.0495	-0.0625	-0.0796	0.0265	0.0216	0.0375	0.0393	0.0439
	15175	0.0547	-0.0626	-0.0796	0.0513	0.0468	0.0718	0.0761	0.0811
	151833	0.0584	-0.0623	0.0367	0.0555	0.0509	0.0756	0.0802	0.0845
	151917	0.0608	0.0243	0.0636	0.0581	0.0533	0.077	0.0814	0.0854
	15.2	0.0631	0.0483	0.068	0.0599	0.0549	0.0784	0.0817	0.0855
	152083	0.0646	0.0527	0.0707	0.0614	0.0562	0.0791	0.0814	0.0851
	152167	0.0658	0.0558	0.0723	0.0626	0.0573	0.0791	0.0809	0.0849
	15225	0.0666	0.0581	0.0735	0.0634	0.0579	0.0796	0.0796	0.0843
	152333	0.0675	0.06	0.0744	0.064	0.0582	0.0799	0.0793	0.084
	152417	0.068	0.0617	0.0747	0.0645	0.0588	0.0803	0.0788	0.084
	15.25	0.0683	0.0631	0.0747	0.0648	0.0591	0.0806	0.0785	0.084
	152583	0.0684	0.064	0.075	0.0649	0.0594	0.0816	0.0782	0.0838
	152667	0.0686	0.0646	0.0748	0.0654	0.0594	0.0819	0.078	0.0842
	15275	0.0686	0.0649	0.075	0.0654	0.0594	0.0819	0.0782	0.0848
	152833	0.0689	0.0655	0.0747	0.0657	0.0596	0.0823	0.0784	0.0855
	152917	0.0687	0.0663	0.0745	0.0657	0.0599	0.0826	0.0788	0.0863
	15.3	0.0689	0.0668	0.0744	0.0657	0.0599	0.0829	0.0791	0.0871
	153083	0.0689	0.0666	0.0745	0.0658	0.0602	0.0832	0.0794	0.0878
	153167	0.0689	0.0669	0.0739	0.0657	0.0599	0.0832	0.0797	0.088
	15325	0.0687	0.0671	0.0736	0.0657	0.06	0.0835	0.08	0.0883
	153333	0.0687	0.0674	0.0735	0.0657	0.0599	0.0842	0.0808	0.0883
	153417	0.0686	0.0672	0.0733	0.0657	0.06	0.0848	0.0808	0.0887
	15.35	0.0686	0.0672	0.073	0.0657	0.06	0.0852	0.0808	0.0887
	153583	0.0684	0.0677	0.0729	0.0655	0.0599	0.0858	0.0809	0.0887
	153667	0.0684	0.0675	0.0726	0.0655	0.06	0.0861	0.0809	0.0887
	15375	0.0683	0.0677	0.0723	0.0654	0.06	0.0863	0.0809	0.0886
	153833	0.0681	0.068	0.0721	0.0652	0.0599	0.0869	0.0809	0.0886
	153917	0.0681	0.0681	0.0718	0.0651	0.06	0.0883	0.0809	0.0887
	15.4	0.0678	0.0683	0.0718	0.0651	0.06	0.0892	0.0811	0.0887
	154083	0.068	0.0684	0.0716	0.0646	0.06	0.0896	0.0806	0.0886
	154167	0.0678	0.0684	0.0712	0.0646	0.0599	0.0901	0.0809	0.0884
	15425	0.0677	0.0684	0.0712	0.0646	0.0599	0.0904	0.0808	0.0889
	154333	0.0675	0.0687	0.071	0.0645	0.06	0.0906	0.0808	0.0889
	154417	0.0675	0.069	0.071	0.0643	0.0599	0.0909	0.0808	0.0892
	15.45	0.0677	0.0695	0.0707	0.0646	0.06	0.0912	0.0806	0.089
	154583	0.0677	0.0697	0.0707	0.0643	0.06	0.0919	0.0809	0.0893
	154667	0.0674	0.0698	0.0707	0.0643	0.06	0.0921	0.0808	0.089
	15475	0.0674	0.0701	0.0707	0.0642	0.06	0.0925	0.0809	0.0893
	154833	0.0674	0.0704	0.0706	0.0642	0.0602	0.093	0.0809	0.0895
	154917	0.0674	0.0747	0.0706	0.064	0.0599	0.0933	0.0813	0.0896
	15.5	0.0674	0.0756	0.0704	0.064	0.06	0.0936	0.0811	0.0898
	155083	0.0671	0.0759	0.0704	0.064	0.06	0.0939	0.0813	0.0901
	155167	0.0669	0.0776	0.0707	0.0642	0.0602	0.0947	0.0816	0.0907
	15525	0.0672	0.0777	0.0706	0.0639	0.06	0.0954	0.0817	0.0909
	155333	0.0672	0.0779	0.0709	0.0639	0.06	0.0962	0.0819	0.0913
	155417	0.0669	0.0817	0.0706	0.064	0.06	0.0967	0.082	0.0913
	15.55	0.0669	0.0819	0.0706	0.064	0.0602	0.0976	0.0823	0.0916
	155583	0.0671	0.0822	0.0706	0.064	0.0602	0.099	0.0828	0.0922
	155667	0.0674	0.0823	0.0706	0.064	0.0602	0.0997	0.0829	0.0925
	15575	0.0671	0.0823	0.0707	0.0639	0.06	0.1005	0.0835	0.0932
	155833	0.0672	0.0823	0.0707	0.064	0.0603	0.1012	0.084	0.0935
	155917	0.0671	0.0825	0.071	0.0639	0.0603	0.1022	0.0843	0.0938
	15.6	0.0671	0.0823	0.071	0.0642	0.0603	0.1029	0.0843	0.0942
	156083	0.0671	0.0825	0.0712	0.064	0.0602	0.1037	0.0849	0.0947
	156167	0.0671	0.0826	0.0712	0.064	0.0603	0.1043	0.0852	0.0951
	15625	0.0672	0.0828	0.0712	0.064	0.0603	0.1051	0.0852	0.0951
	156333	0.0671	0.0832	0.0715	0.064	0.0603	0.1057	0.0858	0.0959
	156417	0.0674	0.0829	0.0716	0.0642	0.0605	0.1063	0.0861	0.0961
	15.65	0.0674	0.0831	0.0715	0.0643	0.0608	0.1066	0.0864	0.0965
	156583	0.0672	0.0834	0.0718	0.0642	0.0608	0.1072	0.0867	0.0967
	156667	0.0677	0.0829	0.0721	0.0643	0.0608	0.1075	0.0874	0.0973
	15675	0.0677	0.0835	0.0723	0.0645	0.0607	0.1083	0.0877	0.0977
	156833	0.0677	0.0834	0.0723	0.0642	0.061	0.1087	0.088	0.0979
	156917	0.0677	0.0835	0.0726	0.0645	0.061	0.1092	0.0884	0.0983
	15.7	0.0677	0.0835	0.0726	0.0642	0.0608	0.1095	0.0887	0.0986
	157083	0.0678	0.0838	0.0727	0.0646	0.061	0.1101	0.089	0.0991
	157167	0.0678	0.084	0.0732	0.0645	0.061	0.1106	0.0895	0.0994
	15725	0.0678	0.0843	0.0732	0.0645	0.061	0.111	0.0896	0.0999
	157333	0.068	0.084	0.0738	0.0646	0.0611	0.1116	0.0901	0.1
	157417	0.0678	0.0842	0.0736	0.0646	0.0611	0.1118	0.0907	0.1009
	15.75	0.0681	0.0843	0.0739	0.0646	0.0613	0.1124	0.0912	0.1012
	157583	0.0681	0.0857	0.0745	0.0649	0.0614	0.1131	0.0912	0.1017
	157667	0.0681	0.086	0.0745	0.0651	0.0611	0.1136	0.0916	0.1022
	15775	0.0681	0.086	0.0747	0.0649	0.0616	0.1139	0.0921	0.1023
	157833	0.0683	0.086	0.0748	0.0648	0.0613	0.1148	0.0924	0.1028
	157917	0.0684	0.0893	0.075	0.0651	0.0614	0.1157	0.0929	0.1034
	15.8	0.0684	0.0895	0.0752	0.0651	0.0617	0.1167	0.0935	0.1041
	158083	0.0686	0.0898	0.0753	0.0651	0.0614	0.1176	0.0938	0.1044
	158167	0.0686	0.0918	0.0753	0.0649	0.0614	0.1185	0.0941	0.1052
	15825	0.0687	0.0927	0.0755	0.0651	0.0614	0.1197	0.0947	0.1061
	158333	0.0687	0.0929	0.0753	0.0651	0.0616	0.1205	0.0951	0.107
	158417	0.0687	0.0979	0.0755	0.0649	0.0614	0.122	0.0956	0.108
	15.85	0.0687	0.0982	0.0756	0.0652	0.0619	0.1235	0.0959	0.1089
	158583	0.0687	0.0985	0.0758	0.0649	0.0614	0.1249	0.0967	0.1101
	158667	0.0689	0.0985	0.0758	0.0651	0.0619	0.1266	0.0968	0.1116
	15875	0.0687	0.0988	0.0758	0.0651	0.0617	0.1284	0.0977	0.1125
	158833	0.0687	0.0991	0.0759	0.0652	0.0617	0.1307	0.098	0.1141
	158917	0.0689	0.0994	0.0758	0.0651	0.0619	0.1328	0.0986	0.1156
	15.9	0.069	0.0996	0.0759	0.0651	0.0616	0.1348	0.0994	0.1173
	159083	0.0689	0.0997	0.0759	0.0652	0.0617	0.1373	0.0999	0.1192
	159167	0.069	0.1	0.0758	0.0652	0.062	0.1388	0.1005	0.1211
	15925	0.0689	0.0999	0.0759	0.0652	0.0619	0.1398	0.1014	0.1232
	159333	0.0687	0.1	0.0761	0.0652	0.062	0.1408	0.1019	0.1257
	159417	0.0689	0.1	0.0759	0.0651	0.0619	0.1418	0.1026	0.1272
	15.95	0.0689	0.1	0.0759	0.0651	0.0619	0.1423	0.1034	0.1289
	159583	0.069	0.1003	0.0759	0.0652	0.0622	0.1427	0.1043	0.1301
	159667	0.069	0.1002	0.0759	0.0652	0.0619	0.1432	0.1055	0.1313
	15975	0.0687	0.1005	0.0761	0.0654	0.0619	0.1437	0.1066	0.1324
	159833	0.069	0.1006	0.0758	0.0652	0.0619	0.144	0.1081	0.1327
	159917	0.069	0.1006	0.0758	0.0652	0.0619	0.144	0.1096	0.1331
	16	0.069	0.1006	0.0758	0.0652	0.062	0.144	0.111	0.1334
	160083	0.0689	0.1006	0.0761	0.0652	0.0619	0.1441	0.1128	0.1333
	160167	0.0689	0.1006	0.0759	0.0651	0.062	0.1437	0.115	0.1333
	16025	0.0687	0.1011	0.0759	0.0649	0.0619	0.1432	0.117	0.1333
	160333	0.0689	0.1009	0.0759	0.0649	0.0617	0.1429	0.1186	0.1334
	160417	0.0689	0.1009	0.0758	0.0652	0.062	0.1429	0.1203	0.1328
	16.05	0.0689	0.1009	0.0758	0.0649	0.0619	0.1427	0.1221	0.1328
	160583	0.0687	0.1017	0.0758	0.0649	0.0617	0.1426	0.1235	0.1327
	160667	0.0689	0.1012	0.0758	0.0652	0.0619	0.1424	0.1249	0.1324
	16075	0.0687	0.1012	0.0758	0.0651	0.062	0.1418	0.1264	0.1324
	160833	0.0687	0.1014	0.0756	0.0649	0.062	0.1415	0.1273	0.1321
	160917	0.0686	0.1009	0.0758	0.0649	0.0616	0.1415	0.1284	0.1318
	16.1	0.0686	0.1009	0.0756	0.0649	0.0619	0.1414	0.129	0.1312
	161083	0.0687	0.1012	0.0756	0.0646	0.0619	0.1414	0.1293	0.1312
	161167	0.0684	0.1009	0.0756	0.0648	0.0616	0.1409	0.1295	0.1308
	16125	0.0684	0.1012	0.0755	0.0649	0.0619	0.1409	0.1295	0.131
	161333	0.0686	0.1009	0.0755	0.0649	0.0616	0.1406	0.1293	0.1307
	161417	0.0686	0.1014	0.0755	0.0649	0.0616	0.1409	0.1292	0.1305
	16.15	0.0687	0.1011	0.0753	0.0648	0.0616	0.1405	0.129	0.1302
	161583	0.0684	0.1014	0.0753	0.0648	0.0616	0.1398	0.1289	0.1301
	161667	-0.0256	0.1014	0.0753	0.0648	0.0616	0.1398	0.1289	0.1299
	161667	-0.052	0.1012	0.0753	-0.0274	-0.0249	-0.0355	-0.033	-0.0448
	16175	-0.0571	0.1017	0.0755	-0.0512	-0.0492	-0.062	-0.0713	-0.0794
	161833	-0.0607	0.1014	-0.0307	-0.0555	-0.0535	-0.0625	-0.0747	-0.0825
	161917	-0.0625	-0.0562	-0.0573	-0.0579	-0.0559	-0.0632	-0.0764	-0.0838
	16.2	-0.0645	-0.0703	-0.0622	-0.0597	-0.0578	-0.0649	-0.0771	-0.0843
	162083	-0.0657	-0.0736	-0.0651	-0.0608	-0.0587	-0.066	-0.0771	-0.0843
	162167	-0.0666	-0.068	-0.0666	-0.0619	-0.0593	-0.0672	-0.0773	-0.084
	16225	-0.0669	-0.0694	-0.0678	-0.0623	-0.0599	-0.068	-0.0774	-0.0838
	162333	-0.0677	-0.0701	-0.0687	-0.0628	-0.0603	-0.0689	-0.0774	-0.0838
	162417	-0.0681	-0.0709	-0.069	-0.0634	-0.0605	-0.0697	-0.0773	-0.0838
	16.25	-0.0683	-0.0712	-0.0698	-0.0636	-0.0607	-0.0706	-0.0774	-0.0838
	162583	-0.0683	-0.0712	-0.0698	-0.0637	-0.0607	-0.0713	-0.0777	-0.0843
	162667	-0.0683	-0.0701	-0.0703	-0.0639	-0.0608	-0.0718	-0.0779	-0.0848
	16275	-0.0684	-0.07	-0.0704	-0.0642	-0.061	-0.0719	-0.0785	-0.0854
	162833	-0.0684	-0.0684	-0.0706	-0.0642	-0.0607	-0.0726	-0.0791	-0.0864
	162917	-0.0684	-0.068	-0.0701	-0.064	-0.0603	-0.0733	-0.0799	-0.0874
	16.3	-0.0684	-0.0681	-0.0704	-0.0639	-0.0605	-0.0736	-0.0811	-0.0884
	163083	-0.0683	-0.0678	-0.07	-0.064	-0.0602	-0.0738	-0.0819	-0.0893
	163167	-0.0683	-0.0675	-0.0703	-0.0639	-0.0603	-0.0745	-0.0826	-0.0896
	16325	-0.0681	-0.0674	-0.07	-0.0639	-0.06	-0.0753	-0.0832	-0.0901
	163333	-0.0681	-0.0668	-0.0698	-0.0639	-0.0599	-0.0759	-0.0835	-0.0906
	163417	-0.0675	-0.066	-0.0695	-0.0637	-0.0599	-0.0765	-0.0837	-0.0907
	16.35	-0.0678	-0.0658	-0.0695	-0.0637	-0.0599	-0.0771	-0.0843	-0.0907
	163583	-0.0675	-0.0655	-0.0694	-0.0637	-0.0596	-0.0776	-0.0842	-0.0906
	163667	-0.0672	-0.0654	-0.069	-0.0636	-0.0596	-0.0785	-0.0843	-0.0909
	16375	-0.0674	-0.0648	-0.0687	-0.0636	-0.0594	-0.0791	-0.0842	-0.0907
	163833	-0.0674	-0.0645	-0.0686	-0.0632	-0.0593	-0.0796	-0.0842	-0.0904
	163917	-0.0669	-0.0646	-0.0686	-0.0634	-0.059	-0.0803	-0.0842	-0.0907
	16.4	-0.0669	-0.0643	-0.0683	-0.0632	-0.0591	-0.0813	-0.084	-0.0906
	164083	-0.0666	-0.0642	-0.068	-0.0631	-0.0591	-0.0823	-0.0838	-0.0904
	164167	-0.0665	-0.064	-0.0678	-0.0631	-0.0588	-0.0832	-0.0835	-0.0909
	16425	-0.0665	-0.0636	-0.0678	-0.0632	-0.0588	-0.084	-0.0838	-0.091
	164333	-0.0663	-0.0636	-0.0677	-0.0629	-0.0588	-0.0851	-0.0837	-0.0912
	164417	-0.0663	-0.0632	-0.0675	-0.0628	-0.0587	-0.0858	-0.0838	-0.0912
	16.45	-0.066	-0.0631	-0.0675	-0.0626	-0.0585	-0.0864	-0.0838	-0.0915
	164583	-0.0658	-0.0629	-0.0672	-0.0626	-0.0585	-0.0866	-0.0838	-0.0916
	164667	-0.0658	-0.0628	-0.0672	-0.0626	-0.0585	-0.0871	-0.084	-0.0915
	16475	-0.0655	-0.0628	-0.0671	-0.0628	-0.0585	-0.0872	-0.084	-0.0918
	164833	-0.0654	-0.0623	-0.0672	-0.0626	-0.0582	-0.0875	-0.084	-0.0922
	164917	-0.0652	-0.0622	-0.0669	-0.0626	-0.0581	-0.0878	-0.0842	-0.0925
	16.5	-0.0651	-0.062	-0.0669	-0.0626	-0.0584	-0.0883	-0.0843	-0.0927
	165083	-0.0651	-0.062	-0.0668	-0.0625	-0.0582	-0.0883	-0.0843	-0.093
	165167	-0.0649	-0.0619	-0.0668	-0.0625	-0.0582	-0.0889	-0.0842	-0.0936
	16525	-0.0648	-0.0616	-0.0671	-0.0626	-0.0581	-0.089	-0.0846	-0.0941
	165333	-0.0646	-0.0614	-0.0668	-0.0625	-0.0579	-0.0898	-0.0846	-0.0945
	165417	-0.0646	-0.0617	-0.0666	-0.0625	-0.0579	-0.09	-0.0848	-0.0951
	16.55	-0.0646	-0.0614	-0.0669	-0.0623	-0.0579	-0.0906	-0.0854	-0.0958
	165583	-0.0643	-0.0613	-0.0668	-0.0625	-0.0579	-0.0918	-0.0855	-0.0964
	165667	-0.0642	-0.0611	-0.0669	-0.0625	-0.0578	-0.0924	-0.0858	-0.097
[truncated: 115,283 more rows]

## Sheet: Li||Li 1.0 mA cm-2
Name	Time	Voltage	Voltage	Voltage	Voltage	Voltage	Voltage	Voltage	Voltage	Voltage
Unit	[h]	[V]	[V]	[V]	[V]	[V]	[V]	[V]	[V]	[V]
Comment		BM-LiLirp-4	BM-LiLirp-11	BM-LiLirp-16	BM-LiN-50	BM-LiN-51	BM-LiN-52	BM-LZLN-33	BM-LZLN-34	BM-LZLN-35
	0	0.0097	0.0002	0.0014	0.001	0.0005	0.0019	-0.0022	-0.0265	-0.0028
	0.0167	0.0068	-0.0001	0.0001	-0.0004	-0.0002	0.0014	-0.0019	-0.0185	-0.0027
	0.0333	0.0056	0.0001	-0.0001	-0.0004	-0.0001	0.0013	-0.0021	-0.013	-0.0027
	0.05	0.0048	-0.0001	0.0001	-0.0004	0.0001	0.0011	-0.0021	-0.0105	-0.0028
	0.0667	0.0045	-0.0004	0.0001	-0.0004	-0.0001	0.001	-0.0021	-0.0086	-0.0027
	0.0833	0.004	-0.0002	0.0002	-0.0002	-0.0001	0.0013	-0.0021	-0.0072	-0.0028
	0.1	0.0039	-0.0004	-0.0001	-0.0002	0.0001	0.0013	-0.0021	-0.0063	-0.0027
	0.1167	0.0036	0.0001	0.0001	-0.0002	0.0001	0.0011	-0.0022	-0.0054	-0.0027
	0.1333	0.0034	-0.0002	0.0001	-0.0001	0.0001	0.0011	-0.0019	-0.005	-0.0025
	0.15	0.0033	-0.0001	-0.0001	-0.0001	-0.0001	0.0013	-0.0019	-0.0043	-0.0025
	0.1667	0.0033	-0.0002	0.0001	-0.0001	0.0001	0.0013	-0.0019	-0.0037	-0.0025
	0.1667	-0.4734	-0.3758	-0.4186	-0.5616	-0.6104	-0.6857	-0.5303	-0.5111	-0.5224
	0.1668	-0.4524	-0.3439	-0.4228	-0.5111	-0.5593	-0.7375	-0.4803	-0.5662	-0.5727
	0.1726	-0.4022	-0.3318	-0.4166	-0.4609	-0.5091	-0.682	-0.4301	-0.516	-0.5224
	0.178	-0.3622	-0.3194	-0.4125	-0.4108	-0.4589	-0.6287	-0.3918	-0.4658	-0.4722
	0.1864	-0.3375	-0.3088	-0.4087	-0.384	-0.4243	-0.5772	-0.3707	-0.4217	-0.4289
	0.1947	-0.3211	-0.2993	-0.4049	-0.3663	-0.404	-0.5264	-0.3579	-0.396	-0.404
	0.203	-0.3094	-0.2905	-0.4005	-0.3521	-0.389	-0.4759	-0.3492	-0.3797	-0.3867
	0.2114	-0.3004	-0.2827	-0.3959	-0.3399	-0.3762	-0.4417	-0.3426	-0.3686	-0.3745
	0.2197	-0.2932	-0.2752	-0.3912	-0.3289	-0.3648	-0.4261	-0.3371	-0.3603	-0.3649
	0.228	-0.2871	-0.2688	-0.3866	-0.3191	-0.3547	-0.4148	-0.3327	-0.3539	-0.3574
	0.2364	-0.2822	-0.2633	-0.3822	-0.3098	-0.3454	-0.4047	-0.3292	-0.3484	-0.3513
	0.2447	-0.2781	-0.2586	-0.377	-0.3011	-0.3362	-0.3956	-0.326	-0.3439	-0.3462
	0.253	-0.2746	-0.2541	-0.3727	-0.2937	-0.3285	-0.388	-0.3231	-0.3394	-0.3416
	0.2614	-0.2711	-0.25	-0.3687	-0.2869	-0.3211	-0.3808	-0.3205	-0.3355	-0.3375
	0.2697	-0.2685	-0.2468	-0.3649	-0.2807	-0.3144	-0.3744	-0.3182	-0.3318	-0.3338
	0.278	-0.2656	-0.2435	-0.3613	-0.2753	-0.3086	-0.3687	-0.3158	-0.3288	-0.3303
	0.2864	-0.2633	-0.2409	-0.3577	-0.2705	-0.3031	-0.3632	-0.3136	-0.326	-0.3272
	0.2947	-0.2609	-0.2384	-0.3547	-0.2662	-0.2978	-0.3581	-0.3117	-0.3236	-0.324
	0.303	-0.2587	-0.2366	-0.3513	-0.2624	-0.2937	-0.3532	-0.3094	-0.321	-0.3213
	0.3114	-0.2566	-0.2345	-0.3486	-0.2586	-0.2894	-0.3487	-0.3077	-0.3185	-0.3187
	0.3197	-0.2552	-0.2325	-0.3455	-0.2555	-0.2857	-0.3448	-0.3053	-0.3162	-0.3162
	0.328	-0.2531	-0.2309	-0.3429	-0.2525	-0.2825	-0.3399	-0.3036	-0.3141	-0.3138
	0.3364	-0.2515	-0.2293	-0.3407	-0.25	-0.2795	-0.3361	-0.3017	-0.312	-0.3114
	0.3447	-0.2494	-0.2279	-0.3381	-0.2474	-0.2769	-0.3323	-0.3001	-0.3098	-0.3094
	0.353	-0.2477	-0.2265	-0.3355	-0.2454	-0.2741	-0.3286	-0.2982	-0.3074	-0.3071
	0.3614	-0.2456	-0.2251	-0.3335	-0.2433	-0.2715	-0.3254	-0.2966	-0.3056	-0.3054
	0.3697	-0.2444	-0.2239	-0.331	-0.2415	-0.2692	-0.3223	-0.2949	-0.3037	-0.3034
	0.378	-0.2428	-0.2227	-0.3291	-0.2399	-0.2671	-0.3198	-0.2935	-0.3019	-0.3016
	0.3864	-0.2418	-0.2218	-0.3269	-0.2384	-0.2648	-0.3175	-0.2918	-0.2996	-0.2998
	0.3947	-0.2403	-0.2207	-0.3251	-0.2369	-0.2628	-0.3152	-0.2905	-0.2981	-0.2981
	0.403	-0.2393	-0.2198	-0.3231	-0.2357	-0.2613	-0.3127	-0.2891	-0.2963	-0.2967
	0.4114	-0.2381	-0.2189	-0.3211	-0.2349	-0.2598	-0.3101	-0.2876	-0.295	-0.295
	0.4197	-0.2374	-0.218	-0.3194	-0.234	-0.2584	-0.3072	-0.2866	-0.2932	-0.294
	0.428	-0.2364	-0.2169	-0.3176	-0.2332	-0.2572	-0.3051	-0.2854	-0.292	-0.2926
	0.4364	-0.2355	-0.2164	-0.3159	-0.2322	-0.2561	-0.3031	-0.2839	-0.2906	-0.2914
	0.4447	-0.2349	-0.2157	-0.3141	-0.2319	-0.2477	-0.3013	-0.283	-0.2891	-0.2902
	0.453	-0.2341	-0.2151	-0.3127	-0.2308	-0.2467	-0.2998	-0.2816	-0.2879	-0.2891
	0.4614	-0.2332	-0.2145	-0.3109	-0.2302	-0.2459	-0.2978	-0.2807	-0.2863	-0.2879
	0.4697	-0.2326	-0.2134	-0.3094	-0.2297	-0.2448	-0.2956	-0.2798	-0.285	-0.2868
	0.478	-0.2322	-0.2132	-0.308	-0.2291	-0.2442	-0.2934	-0.2786	-0.2837	-0.2856
	0.4864	-0.2316	-0.2123	-0.3066	-0.2285	-0.2436	-0.2918	-0.2773	-0.2827	-0.2847
	0.4947	-0.2308	-0.2119	-0.305	-0.228	-0.2428	-0.2906	-0.2764	-0.2818	-0.2836
	0.503	-0.2303	-0.2114	-0.3039	-0.2276	-0.2421	-0.2895	-0.275	-0.281	-0.2828
	0.5114	-0.2297	-0.2105	-0.3027	-0.227	-0.2415	-0.2885	-0.274	-0.2801	-0.2819
	0.5197	-0.229	-0.2105	-0.3011	-0.2271	-0.2407	-0.2877	-0.2731	-0.2787	-0.281
	0.528	-0.2285	-0.2099	-0.2999	-0.2265	-0.2404	-0.2866	-0.2718	-0.2779	-0.2802
	0.5364	-0.228	-0.2093	-0.2988	-0.2262	-0.2398	-0.2862	-0.2709	-0.2767	-0.2793
	0.5447	-0.2276	-0.2091	-0.2975	-0.2259	-0.239	-0.2856	-0.2699	-0.2758	-0.2786
	0.553	-0.2273	-0.2085	-0.2964	-0.2258	-0.2389	-0.285	-0.2689	-0.2749	-0.2778
	0.5614	-0.2264	-0.2079	-0.2953	-0.2251	-0.2384	-0.2847	-0.2677	-0.2744	-0.2772
	0.5697	-0.2258	-0.2074	-0.2944	-0.2248	-0.238	-0.2836	-0.267	-0.2737	-0.2766
	0.578	-0.2255	-0.2071	-0.293	-0.2245	-0.2374	-0.2828	-0.2662	-0.2724	-0.2758
	0.5864	-0.225	-0.2064	-0.2923	-0.2239	-0.2372	-0.2824	-0.2654	-0.2714	-0.275
	0.5947	-0.2242	-0.2061	-0.2912	-0.2236	-0.2367	-0.2815	-0.2642	-0.2708	-0.2744
	0.603	-0.2239	-0.2055	-0.2903	-0.2233	-0.236	-0.2805	-0.2631	-0.2702	-0.274
	0.6114	-0.2233	-0.2052	-0.2895	-0.223	-0.2358	-0.2804	-0.2625	-0.2694	-0.2732
	0.6197	-0.2227	-0.2047	-0.2885	-0.2224	-0.2355	-0.2793	-0.2619	-0.2685	-0.2726
	0.628	-0.2222	-0.2039	-0.2877	-0.2222	-0.2351	-0.2787	-0.2609	-0.2674	-0.2721
	0.6364	-0.2218	-0.2035	-0.2869	-0.2216	-0.2345	-0.2782	-0.2601	-0.2667	-0.2717
	0.6447	-0.221	-0.203	-0.2859	-0.221	-0.2338	-0.2775	-0.2596	-0.266	-0.2712
	0.653	-0.2206	-0.2027	-0.2854	-0.2207	-0.2334	-0.277	-0.259	-0.2656	-0.2708
	0.6614	-0.2206	0.1058	0.1383	-0.2201	-0.2329	-0.2764	-0.2589	-0.2648	-0.2703
	0.6667	0.0861	0.1371	0.1333	-0.22	-0.2326	-0.2758	0.1031	-0.2644	-0.2699
	0.6667	0.1203	0.1344	0.1241	0.1344	0.1498	-0.2752	0.1392	0.0835	-0.2699
	0.6688	0.1243	0.1331	0.125	0.1481	0.1582	-0.2743	0.1371	0.1336	0.0986
	0.6771	0.1284	0.1334	0.135	0.1403	0.1536	-0.2734	0.1339	0.1286	0.1489
	0.6855	0.1318	0.1336	0.1615	0.14	0.155	-0.2732	0.1363	0.1273	0.1424
	0.6938	0.1339	0.1336	0.212	0.1478	0.1597	0.1879	0.1466	0.1278	0.1377
	0.7021	0.1359	0.1336	0.2624	0.1678	0.1662	0.1734	0.1707	0.1308	0.1368
	0.7105	0.1373	0.1336	0.3127	0.1876	0.1769	0.1641	0.2132	0.1379	0.1391
	0.7188	0.1385	0.1333	0.3561	0.2087	0.1872	0.1627	0.2634	0.1524	0.1467
	0.7271	0.1395	0.1333	0.3808	0.2154	0.1968	0.1655	0.3135	0.1745	0.1609
	0.7355	0.1406	0.1331	0.388	0.2143	0.2016	0.1733	0.3495	0.2215	0.182
	0.7405	0.142	0.1331	0.3881	0.2099	0.2032	0.1891	0.351	0.2717	0.2151
	0.7453	0.1434	0.1333	0.384	0.2053	0.2036	0.2119	0.3434	0.3227	0.2627
	0.7536	0.1458	0.1337	0.3768	0.2016	0.2052	0.2314	0.3359	0.3713	0.3127
	0.762	0.1487	0.1341	0.3696	0.1991	0.2081	0.2308	0.3289	0.3718	0.3599
	0.7703	0.1531	0.1347	0.3625	0.1987	0.2119	0.227	0.322	0.3596	0.3466
	0.7786	0.1582	0.1351	0.355	0.2004	0.2169	0.2233	0.3153	0.3487	0.3355
	0.787	0.1618	0.1359	0.3489	0.2038	0.2241	0.221	0.3097	0.3404	0.3262
	0.7953	0.1637	0.1366	0.3426	0.2094	0.2346	0.2204	0.3042	0.333	0.3185
	0.8036	0.1655	0.1374	0.3368	0.2177	0.2485	0.2215	0.2988	0.3266	0.3121
	0.812	0.1667	0.1382	0.3318	0.2288	0.2679	0.2245	0.2946	0.3217	0.3066
	0.8203	0.1687	0.1391	0.3269	0.2488	0.286	0.2287	0.2905	0.3167	0.3017
	0.8286	0.1708	0.1398	0.3222	0.2721	0.3033	0.2355	0.2868	0.3129	0.2975
	0.837	0.1727	0.1412	0.3178	0.2963	0.3115	0.2461	0.2839	0.3094	0.2935
	0.8453	0.1748	0.1424	0.314	0.3146	0.3162	0.2621	0.2811	0.3066	0.2898
	0.8536	0.1774	0.1444	0.3103	0.3213	0.3156	0.2865	0.2786	0.3043	0.2866
	0.862	0.18	0.1466	0.3065	0.3205	0.3144	0.3269	0.2763	0.3011	0.2836
	0.8703	0.1826	0.149	0.303	0.317	0.3107	0.3732	0.2743	0.2981	0.2807
	0.8786	0.1849	0.1516	0.2993	0.3127	0.3071	0.3884	0.2721	0.2952	0.2782
	0.887	0.1876	0.1551	0.2961	0.3066	0.3031	0.3819	0.2706	0.2929	0.2758
	0.8953	0.1907	0.1598	0.2926	0.3021	0.2999	0.3725	0.2685	0.2911	0.2734
	0.9036	0.1934	0.1655	0.2892	0.2985	0.2963	0.3628	0.2668	0.2885	0.2709
	0.912	0.1957	0.172	0.2859	0.2967	0.2935	0.3553	0.2651	0.2879	0.2685
	0.9203	0.1978	0.1788	0.2825	0.294	0.2909	0.3495	0.2638	0.285	0.2667
	0.9286	0.1997	0.1864	0.2793	0.292	0.2888	0.3442	0.2625	0.2837	0.2647
	0.937	0.2018	0.1951	0.2763	0.2902	0.2862	0.3402	0.2615	0.2824	0.263
	0.9453	0.2042	0.2033	0.2731	0.288	0.2845	0.337	0.2624	0.2807	0.2613
	0.9536	0.2071	0.214	0.2702	0.2865	0.283	0.3339	0.2647	0.2795	0.2596
	0.962	0.21	0.2262	0.2673	0.2845	0.2818	0.3317	0.2679	0.2775	0.254
	0.9703	0.2132	0.2363	0.2644	0.2833	0.2805	0.3294	0.2682	0.276	0.2573
	0.9786	0.2172	0.2406	0.2616	0.2821	0.279	0.3277	0.2688	0.2744	0.2558
	0.987	0.2206	0.2416	0.2593	0.2805	0.2779	0.3262	0.2683	0.272	0.2523
	0.9953	0.2233	0.2432	0.2564	0.2793	0.2769	0.3248	0.2674	0.2706	0.2515
	10036	0.2268	0.241	0.2543	0.2781	0.2758	0.3231	0.2654	0.2696	0.2522
	1012	0.2309	0.238	0.2519	0.2767	0.2749	0.3222	0.2665	0.2676	0.2512
	10203	0.2349	0.2349	0.2497	0.276	0.274	0.321	0.2654	0.2671	0.2493
	10286	0.2403	0.2311	0.2474	0.275	0.2726	0.3198	0.265	0.266	0.2479
	1037	0.2465	0.2277	0.2453	0.2743	0.2717	0.3187	0.2644	0.2665	0.2476
	10453	0.2491	0.2253	0.2435	0.2731	0.2709	0.3176	0.2636	0.2656	0.2465
	10536	0.2479	0.223	0.2415	0.272	0.2697	0.3167	0.2627	0.2651	0.2464
	1062	0.2442	0.2212	0.2395	0.2711	0.2691	0.3161	0.2604	0.2638	0.2456
	10703	0.2398	0.2201	0.2377	0.2705	0.2682	0.3155	0.261	0.2633	0.2428
	10786	0.2354	0.2186	0.236	0.2696	0.2674	0.3147	0.2601	0.2624	0.2438
	1087	0.2306	0.2175	0.2343	0.2689	0.2665	0.3141	0.2589	0.2625	0.2432
	10953	0.2262	0.2172	0.2326	0.2679	0.2657	0.313	0.2583	0.2616	0.2422
	11036	0.2222	0.216	0.2313	0.2673	0.2653	0.3126	0.2587	0.2604	0.2415
	1112	0.2187	0.2131	0.2294	0.2662	0.2644	0.3121	0.2578	0.2589	0.2404
	11203	0.2154	0.2103	0.2277	0.2654	0.2639	0.3114	0.2575	0.2569	0.2399
	11286	0.2123	0.2081	0.2265	0.2645	0.2631	0.3107	0.2567	0.2557	0.2386
	1137	0.2094	0.2061	0.225	0.2636	0.2622	0.3101	0.2575	0.2546	0.238
	11453	0.2068	-0.1264	0.2238	0.263	0.2615	0.3098	0.2599	0.2537	0.2377
	11536	-0.1139	-0.1165	0.2232	0.2621	0.2609	0.3097	0.2598	0.2531	0.2372
	1162	-0.1197	-0.1131	-0.1238	-0.1711	-0.1803	0.3092	-0.1061	0.2525	0.2352
	11667	-0.1136	-0.1128	-0.1272	-0.1446	-0.154	0.3091	-0.1272	0.2523	0.2332
	11667	-0.1116	-0.113	-0.1174	-0.1362	-0.1447	0.3086	-0.1154	-0.0851	-0.086
	1.17	-0.1104	-0.1135	-0.1139	-0.1398	-0.1443	0.3083	-0.1095	-0.1351	-0.1238
	11784	-0.1102	-0.1138	-0.115	-0.1627	-0.1521	-0.2131	-0.108	-0.1328	-0.1173
	11867	-0.1101	-0.1136	-0.1241	-0.1775	-0.1621	-0.1861	-0.1093	-0.1267	-0.1109
	1195	-0.1102	-0.1136	-0.1548	-0.1817	-0.1685	-0.1865	-0.1142	-0.1246	-0.1083
	12034	-0.1104	-0.1136	-0.1777	-0.1775	-0.1687	-0.2038	-0.1215	-0.1257	-0.1077
	12117	-0.1109	-0.1133	-0.1849	-0.1691	-0.1662	-0.2198	-0.1299	-0.1299	-0.1089
	1.22	-0.1109	-0.1133	-0.1891	-0.1592	-0.1623	-0.2175	-0.1389	-0.1356	-0.1125
	12284	-0.111	-0.1128	-0.1926	-0.1504	-0.1579	-0.2071	-0.1476	-0.1415	-0.1177
	12367	-0.1113	-0.1131	-0.1951	-0.144	-0.1534	-0.1962	-0.1562	-0.1482	-0.1243
	1245	-0.1119	-0.1133	-0.1968	-0.1395	-0.1502	-0.1872	-0.1643	-0.1562	-0.1327
	12534	-0.1122	-0.1135	-0.1986	-0.1354	-0.147	-0.1806	-0.1722	-0.1643	-0.1432
	12617	-0.113	-0.1144	-0.2001	-0.1325	-0.1443	-0.1751	-0.1809	-0.1708	-0.1542
	1.27	-0.1142	-0.1151	-0.2024	-0.1299	-0.1424	-0.1713	-0.1894	-0.1768	-0.1637
	12784	-0.1153	-0.1168	-0.2045	-0.1283	-0.1405	-0.1685	-0.1986	-0.1827	-0.1725
	12867	-0.1164	-0.1186	-0.2068	-0.1269	-0.1398	-0.1662	-0.2076	-0.1893	-0.182
	1295	-0.118	-0.1197	-0.2107	-0.126	-0.1394	-0.1649	-0.2163	-0.1965	-0.1928
	13034	-0.1191	-0.1209	-0.2154	-0.1257	-0.1391	-0.164	-0.2241	-0.2039	-0.2052
	13117	-0.1203	-0.1221	-0.2206	-0.1255	-0.1397	-0.1637	-0.2314	-0.2116	-0.2174
	1.32	-0.1214	-0.1231	-0.2261	-0.1255	-0.1408	-0.164	-0.2375	-0.2197	-0.2273
	13284	-0.1229	-0.1243	-0.2309	-0.1261	-0.1424	-0.1649	-0.2428	-0.2273	-0.2348
	13367	-0.1244	-0.1255	-0.2351	-0.1273	-0.1449	-0.1662	-0.2474	-0.2354	-0.2403
	1345	-0.1258	-0.1272	-0.2384	-0.1292	-0.1482	-0.1676	-0.2511	-0.2435	-0.2445
	13534	-0.1275	-0.1286	-0.2404	-0.1313	-0.1533	-0.1701	-0.254	-0.2512	-0.2479
	13617	-0.1299	-0.1305	-0.2413	-0.1348	-0.1611	-0.1734	-0.2563	-0.258	-0.2506
	1.37	-0.1327	-0.1324	-0.2409	-0.1397	-0.1731	-0.1783	-0.2572	-0.2631	-0.2537
	13784	-0.1357	-0.1347	-0.2401	-0.1469	-0.1919	-0.1853	-0.2587	-0.2671	-0.2557
	13867	-0.1394	-0.1368	-0.2392	-0.1568	-0.2157	-0.1943	-0.2596	-0.2697	-0.2575
	1395	-0.145	-0.1394	-0.2378	-0.1713	-0.2335	-0.2059	-0.2604	-0.2714	-0.2592
	14034	-0.1511	-0.1424	-0.2367	-0.1902	-0.2422	-0.2204	-0.2607	-0.2731	-0.2598
	14117	-0.1556	-0.1456	-0.2357	-0.209	-0.2454	-0.2393	-0.2604	-0.2743	-0.2602
	1.42	-0.1592	-0.1493	-0.2345	-0.2215	-0.2456	-0.2595	-0.2601	-0.2747	-0.2604
	14284	-0.1641	-0.1537	-0.2332	-0.2267	-0.2447	-0.276	-0.2595	-0.2747	-0.2587
	14367	-0.1687	-0.1588	-0.2322	-0.2284	-0.2433	-0.2848	-0.2589	-0.2737	-0.2593
	1445	-0.1739	-0.1646	-0.2309	-0.2282	-0.2422	-0.2874	-0.2573	-0.2728	-0.2589
	14534	-0.1792	-0.1711	-0.2299	-0.2277	-0.2384	-0.2876	-0.2558	-0.2714	-0.2584
	14617	-0.1852	-0.1785	-0.2287	-0.2271	-0.2369	-0.2874	-0.2547	-0.27	-0.258
	1.47	-0.1914	-0.1868	-0.2276	-0.2264	-0.236	-0.2874	-0.2532	-0.2677	-0.2569
	14784	-0.1986	-0.1942	-0.2265	-0.2256	-0.2346	-0.2868	-0.2522	-0.2668	-0.2563
	14867	-0.2074	-0.2015	-0.2256	-0.2248	-0.2334	-0.2866	-0.2508	-0.2659	-0.2552
	1495	-0.2169	-0.2071	-0.2245	-0.2241	-0.2325	-0.2862	-0.2496	-0.265	-0.254
	15034	-0.2256	-0.2125	-0.2236	-0.223	-0.2314	-0.2857	-0.2485	-0.2641	-0.2532
	15117	-0.2322	-0.2163	-0.2226	-0.2222	-0.2305	-0.2847	-0.2474	-0.263	-0.2525
	1.52	-0.236	-0.2175	-0.2218	-0.2216	-0.2293	-0.2837	-0.2465	-0.2619	-0.2519
	15284	-0.2375	-0.216	-0.2207	-0.2209	-0.2285	-0.283	-0.2451	-0.261	-0.2512
	15367	-0.2364	-0.2126	-0.2198	-0.22	-0.2276	-0.2821	-0.2438	-0.2596	-0.2502
	1545	-0.2335	-0.2087	-0.2189	-0.219	-0.2265	-0.2813	-0.243	-0.2584	-0.25
	15534	-0.2294	-0.2053	-0.218	-0.2184	-0.2258	-0.2805	-0.2421	-0.2575	-0.2496
	15617	-0.225	-0.2023	-0.2172	-0.2177	-0.225	-0.2799	-0.2413	-0.2566	-0.2486
	1.57	-0.221	-0.1992	-0.2163	-0.2169	-0.2242	-0.2793	-0.2404	-0.256	-0.2483
	15784	-0.2171	-0.1963	-0.2154	-0.2163	-0.2235	-0.2792	-0.2395	-0.2551	-0.2479
	15867	-0.2129	-0.1939	-0.2145	-0.2157	-0.2227	-0.279	-0.2387	-0.2549	-0.2474
	1595	-0.2097	-0.1914	-0.2139	-0.2151	-0.2221	-0.2784	-0.2386	-0.2541	-0.2468
	16034	-0.2068	-0.1894	-0.2129	-0.2145	-0.2213	-0.2776	-0.2378	-0.2535	-0.2462
	16117	-0.2039	-0.1876	-0.2123	-0.2139	-0.2209	-0.277	-0.2372	-0.2531	-0.2454
	1.62	-0.2012	-0.1855	-0.2116	-0.2131	-0.2204	-0.2766	-0.2363	-0.2528	-0.2451
	16284	-0.1989	-0.1838	-0.211	-0.2128	-0.22	-0.276	-0.2358	-0.2528	-0.2447
	16367	-0.1968	0.1095	-0.21	-0.2122	-0.219	-0.276	-0.2351	-0.2529	-0.2444
	1645	0.0997	0.1296	-0.2094	-0.2119	-0.2187	-0.256	-0.2345	-0.2529	-0.2439
	16534	0.1171	0.1225	0.1235	0.1394	0.1505	-0.2558	0.08	-0.2528	-0.2436
	16617	0.1057	0.1182	0.1215	0.135	0.1456	-0.2555	0.1197	-0.2529	-0.243
	16667	0.1014	0.1156	0.1171	0.1324	0.1455	-0.2552	0.1145	-0.2526	0.0774
	16667	0.0991	0.1141	0.1231	0.1446	0.1551	-0.2549	0.1089	0.0831	0.1258
	1675	0.0983	0.1128	0.1423	0.173	0.1702	0.1835	0.1055	0.1295	0.1206
	16833	0.0979	0.1115	0.1722	0.1881	0.1785	0.1585	0.1046	0.1257	0.1138
	16917	0.0977	0.1107	0.1847	0.1804	0.1717	0.1646	0.1058	0.1241	0.1099
	1.7	0.0979	0.1099	0.187	0.1672	0.1601	0.1901	0.1095	0.1243	0.1087
	17083	0.0976	0.1092	0.1839	0.1548	0.1493	0.2212	0.116	0.127	0.1095
	17167	0.0976	0.1084	0.178	0.145	0.1418	0.2152	0.1247	0.1322	0.1119
	1725	0.098	0.1078	0.172	0.138	0.1359	0.1957	0.1354	0.14	0.1171
	17333	0.0983	0.1069	0.1667	0.1333	0.1321	0.1785	0.1446	0.1516	0.1246
	17417	0.0982	0.1067	0.1637	0.1292	0.1289	0.1664	0.1537	0.1627	0.1334
	1.75	0.0983	0.1061	0.1614	0.1266	0.1266	0.1579	0.1614	0.1716	0.1434
	17583	0.0986	0.1057	0.1606	0.1249	0.125	0.1521	0.1696	0.1765	0.1516
	17667	0.0988	0.1052	0.1608	0.1232	0.1238	0.1481	0.1844	0.1794	0.1594
	1775	0.099	0.1049	0.1618	0.1221	0.1234	0.145	0.1934	0.1815	0.1666
	17833	0.0993	0.1044	0.164	0.1214	0.1232	0.1429	0.203	0.1833	0.1734
	17917	0.0997	0.1043	0.1672	0.1211	0.1228	0.1414	0.2131	0.1853	0.1807
	1.8	0.1	0.1038	0.1717	0.1211	0.1232	0.14	0.2222	0.1878	0.1876
	18083	0.1006	0.1037	0.1769	0.1212	0.124	0.1394	0.2309	0.1908	0.1951
	18167	0.1014	0.1035	0.1826	0.1218	0.125	0.1389	0.2399	0.1946	0.2036
	1825	0.1025	0.1035	0.1885	0.1225	0.1269	0.1388	0.2486	0.2003	0.2129
	18333	0.1037	0.1035	0.1937	0.1237	0.1287	0.1391	0.2566	0.2084	0.2221
	18417	0.1049	0.1034	0.1987	0.1255	0.1318	0.1394	0.2627	0.2195	0.2306
	1.85	0.1069	0.1038	0.2023	0.1279	0.1356	0.1406	0.2685	0.2337	0.2383
	18583	0.1087	0.104	0.2049	0.1312	0.1411	0.1417	0.2724	0.2496	0.2442
	18667	0.1099	0.1043	0.2068	0.136	0.1482	0.1432	0.2749	0.2615	0.2491
	1875	0.1118	0.1044	0.2082	0.1421	0.1577	0.1458	0.276	0.2685	0.2523
	18833	0.1135	0.1051	0.209	0.1504	0.1704	0.1485	0.277	0.2718	0.2532
	18917	0.1159	0.1057	0.2097	0.1608	0.1855	0.1527	0.2772	0.2743	0.2532
	1.9	0.1182	0.1067	0.21	0.1737	0.1995	0.1579	0.277	0.2763	0.2529
	19083	0.1209	0.108	0.2103	0.191	0.2148	0.1641	0.2763	0.2761	0.2522
	19167	0.1244	0.1098	0.2103	0.2096	0.2287	0.172	0.2752	0.2755	0.2512
	1925	0.1278	0.1118	0.2103	0.2259	0.2386	0.1807	0.274	0.274	0.25
	19333	0.1307	0.1145	0.2105	0.2357	0.2436	0.1913	0.2729	0.2724	0.2488
	19417	0.1336	0.1186	0.2102	0.2407	0.2444	0.2049	0.2717	0.2706	0.2476
	1.95	0.1363	0.1238	0.2102	0.2422	0.2442	0.2186	0.2706	0.2688	0.2465
	19583	0.1392	0.129	0.2099	0.2432	0.2438	0.2351	0.27	0.267	0.2454
	19667	0.1421	0.1345	0.2097	0.243	0.2428	0.2537	0.2688	0.2651	0.2444
	1975	0.1453	0.1414	0.2097	0.2425	0.2419	0.2697	0.2679	0.263	0.2406
	19833	0.1487	0.1479	0.2094	0.2421	0.2409	0.2787	0.267	0.2616	0.2406
	19917	0.1525	0.154	0.2094	0.241	0.2401	0.2818	0.2662	0.2599	0.2418
	2	0.1565	0.1604	0.209	0.2406	0.2393	0.2824	0.2659	0.258	0.2407
	20083	0.1611	0.1673	0.2088	0.2396	0.2387	0.2825	0.265	0.2567	0.2399
	20167	0.1667	0.1736	0.2087	0.239	0.2378	0.2825	0.2639	0.2551	0.2393
	2025	0.1739	0.1801	0.2082	0.2384	0.2369	0.2828	0.2634	0.2537	0.2384
	20333	0.1809	0.1868	0.2079	0.2381	0.2363	0.2825	0.2627	0.2522	0.2378
	20417	0.1887	0.1928	0.2078	0.2377	0.2357	0.2824	0.2621	0.2512	0.237
	2.05	0.1971	0.1984	0.2073	0.2374	0.2349	0.2824	0.2615	0.2496	0.2363
	20583	0.2074	0.2056	0.207	0.2366	0.2345	0.2824	0.2638	0.2485	0.2358
	20667	0.2174	0.2097	0.2067	0.2363	0.2335	0.2822	0.2631	0.2474	0.2351
	2075	0.2245	0.2116	0.2062	0.236	0.2331	0.2824	0.2625	0.2464	0.2341
	20833	0.2227	0.2107	0.2059	0.2354	0.2328	0.2827	0.2619	0.2454	0.2335
	20917	0.2189	0.2116	0.2056	0.2351	0.2323	0.2827	0.2613	0.2445	0.2328
	2.1	0.2149	0.2119	0.205	0.2348	0.2314	0.283	0.261	0.2438	0.2319
	21083	0.2111	0.2125	0.2049	0.2345	0.2316	0.2834	0.2604	0.2432	0.2316
	21167	0.2074	0.211	0.2049	0.2341	0.2306	0.2836	0.2598	0.2419	0.2313
	2125	0.2041	0.2081	0.2042	0.234	0.2303	0.2836	0.2592	0.2413	0.2305
	21333	0.2012	-0.1334	0.2039	0.2335	0.23	0.2839	0.2586	0.2407	0.2299
	21417	-0.1171	-0.1192	0.2038	0.2334	0.2294	0.284	0.258	0.2401	0.2293
	2.15	-0.1093	-0.1162	-0.1226	-0.1559	-0.1626	0.2842	-0.0974	0.2395	0.2287
	21583	-0.1034	-0.1156	-0.1244	-0.1379	-0.1492	0.2845	-0.1217	0.2392	0.2282
	21667	-0.1009	-0.1154	-0.1199	-0.1339	-0.1484	0.2851	-0.1109	0.2389	-0.0758
	21667	-0.0996	-0.1153	-0.1221	-0.1427	-0.1542	0.2851	-0.1054	-0.0715	-0.1186
	21697	-0.0991	-0.115	-0.1324	-0.1656	-0.1612	-0.2061	-0.1046	-0.1217	-0.1147
	2178	-0.0986	-0.1145	-0.1568	-0.1801	-0.1652	-0.1955	-0.1069	-0.1315	-0.1099
	21863	-0.0983	-0.1139	-0.1646	-0.176	-0.1626	-0.2119	-0.1098	-0.1304	-0.1064
	21947	-0.0979	-0.1133	-0.1652	-0.1649	-0.1565	-0.2381	-0.1159	-0.1299	-0.1052
	2203	-0.0976	-0.1119	-0.1629	-0.1536	-0.1495	-0.2374	-0.1254	-0.1322	-0.1054
	22113	-0.0971	-0.1112	-0.1582	-0.1435	-0.1435	-0.2197	-0.1359	-0.1366	-0.1077
	22197	-0.0968	-0.1102	-0.1527	-0.1353	-0.1382	-0.2012	-0.1456	-0.1424	-0.1113
	2228	-0.0967	-0.1093	-0.1466	-0.1296	-0.1334	-0.187	-0.1539	-0.1496	-0.1176
	22363	-0.0962	-0.1081	-0.1421	-0.1252	-0.1296	-0.1772	-0.1609	-0.1586	-0.1257
	22447	-0.0956	-0.1063	-0.1379	-0.1218	-0.127	-0.1711	-0.1662	-0.1662	-0.136
	2253	-0.0953	-0.1054	-0.1347	-0.1194	-0.1247	-0.167	-0.1695	-0.1716	-0.1484
	22613	-0.0951	-0.1048	-0.1322	-0.1173	-0.1228	-0.1635	-0.1727	-0.1751	-0.1575
	22697	-0.0948	-0.104	-0.1304	-0.1156	-0.1215	-0.1614	-0.1749	-0.1771	-0.1623
	2278	-0.0948	-0.1032	-0.129	-0.1144	-0.1203	-0.16	-0.1772	-0.1781	-0.1655
	22863	-0.095	-0.1029	-0.1279	-0.1131	-0.1194	-0.1589	-0.1803	-0.1789	-0.1691
	22947	-0.0951	-0.1023	-0.1275	-0.1124	-0.1186	-0.1582	-0.1843	-0.1794	-0.173
	2303	-0.0956	-0.1017	-0.1272	-0.1121	-0.1182	-0.1575	-0.1899	-0.1801	-0.1778
	23113	-0.0956	-0.1014	-0.1275	-0.1118	-0.1179	-0.1571	-0.1968	-0.1815	-0.1839
	23197	-0.0962	-0.1012	-0.1283	-0.1115	-0.1179	-0.1571	-0.2073	-0.1843	-0.1922
	2328	-0.0967	-0.1009	-0.1298	-0.1118	-0.1182	-0.1568	-0.22	-0.1884	-0.2035
	23363	-0.097	-0.1006	-0.1321	-0.1121	-0.1183	-0.1571	-0.2337	-0.1946	-0.2174
	23447	-0.0979	-0.1008	-0.1351	-0.1124	-0.1194	-0.1571	-0.2439	-0.2041	-0.2306
	2353	-0.0983	-0.1005	-0.1389	-0.1133	-0.1203	-0.1574	-0.2502	-0.218	-0.2412
	23613	-0.0991	-0.1006	-0.1441	-0.1144	-0.1217	-0.1577	-0.254	-0.2349	-0.248
	23697	-0.0993	-0.1008	-0.151	-0.1153	-0.1234	-0.1582	-0.2564	-0.2505	-0.2515
	2378	-0.1	-0.1008	-0.1586	-0.1173	-0.1257	-0.1594	-0.2583	-0.2618	-0.2538
	23863	-0.1009	-0.1009	-0.1666	-0.1194	-0.1287	-0.1608	-0.2599	-0.2676	-0.2551
	23947	-0.1017	-0.1014	-0.1734	-0.1223	-0.1324	-0.163	-0.2601	-0.2708	-0.2564
	2403	-0.1025	-0.1017	-0.1781	-0.126	-0.1377	-0.1655	-0.2596	-0.2729	-0.2572
	24113	-0.1035	-0.1022	-0.1812	-0.131	-0.1447	-0.1691	-0.2593	-0.2741	-0.2576
	24197	-0.1052	-0.1029	-0.1824	-0.1376	-0.154	-0.1734	-0.2583	-0.275	-0.2581
	2428	-0.107	-0.1035	-0.1836	-0.1463	-0.1659	-0.18	-0.257	-0.2746	-0.2581
	24363	-0.1089	-0.1046	-0.1839	-0.1563	-0.1788	-0.1884	-0.2557	-0.274	-0.2583
	24447	-0.111	-0.1055	-0.1841	-0.1669	-0.1878	-0.2001	-0.2544	-0.2734	-0.2576
	2453	-0.1138	-0.1073	-0.1844	-0.1754	-0.193	-0.2145	-0.2523	-0.272	-0.2572
	24613	-0.1177	-0.1098	-0.1846	-0.1801	-0.1949	-0.2288	-0.2517	-0.2708	-0.2567
	24697	-0.1238	-0.1141	-0.1847	-0.1826	-0.1957	-0.2377	-0.2505	-0.2691	-0.2552
	2478	-0.1301	-0.1189	-0.1849	-0.1833	-0.1955	-0.2421	-0.2497	-0.2676	-0.2547
	24863	-0.1369	-0.1246	-0.1849	-0.1841	-0.1949	-0.2436	-0.249	-0.2663	-0.2538
	24947	-0.1432	-0.1333	-0.185	-0.1846	-0.1946	-0.2445	-0.2479	-0.2651	-0.2531
	2503	-0.1502	-0.1435	-0.1852	-0.1846	-0.1945	-0.2445	-0.2468	-0.2641	-0.2526
	25113	-0.1569	-0.1536	-0.1852	-0.1849	-0.1942	-0.2448	-0.2461	-0.2628	-0.2517
	25197	-0.1647	-0.1635	-0.1852	-0.1847	-0.1939	-0.2447	-0.2453	-0.2616	-0.2508
	2528	-0.1749	-0.1746	-0.1852	-0.1847	-0.1936	-0.2229	-0.2447	-0.2607	-0.25
	25363	-0.1867	-0.1867	-0.1853	-0.1846	-0.1933	-0.2229	-0.2439	-0.2598	-0.2494
	25447	-0.1987	-0.1978	-0.1853	-0.1846	-0.1931	-0.2227	-0.2427	-0.2584	-0.2483
	2553	-0.2081	-0.2049	-0.1853	-0.1846	-0.1928	-0.2229	-0.2421	-0.2575	-0.2476
	25613	-0.2123	-0.2084	-0.1856	-0.1849	-0.1926	-0.2227	-0.2413	-0.2564	-0.247
	25697	-0.214	-0.209	-0.1855	-0.1846	-0.1923	-0.2229	-0.2407	-0.2558	-0.2465
	2578	-0.2129	-0.207	-0.1856	-0.1849	-0.1923	-0.2229	-0.2396	-0.2549	-0.2457
	25863	-0.2116	-0.2038	-0.1856	-0.185	-0.1922	-0.223	-0.2389	-0.2541	-0.2448
	25947	-0.2088	-0.2006	-0.1858	-0.1847	-0.192	-0.223	-0.2384	-0.2535	-0.2436
	2603	-0.2059	-0.1977	-0.1856	-0.1849	-0.1919	-0.223	-0.2375	-0.2528	-0.2432
	26113	-0.2035	-0.1949	-0.1856	-0.1852	-0.192	-0.2233	-0.2372	-0.2523	-0.2427
	26197	-0.2003	-0.1923	-0.1856	-0.1853	-0.1919	-0.2235	-0.2369	-0.2512	-0.2424
	2628	-0.1978	0.1226	-0.1856	-0.1852	-0.1917	-0.2235	-0.2361	-0.2505	-0.2422
	26363	0.1057	0.1318	-0.1856	-0.1852	-0.1917	-0.2235	-0.236	-0.2496	-0.2416
	26447	0.1115	0.125	0.1112	0.1206	0.1301	-0.2235	0.0718	-0.249	-0.2413
	2653	0.1041	0.1212	0.1254	0.1312	0.1443	-0.2236	0.1135	-0.248	-0.2409
	26613	0.1005	0.1188	0.1258	0.1304	0.1472	-0.2239	0.1135	-0.2477	0.0665
	26667	0.0983	0.117	0.135	0.1371	0.155	-0.2241	0.1127	-0.2471	0.115
	26667	0.0967	0.115	0.1531	0.1545	0.1637	0.1629	0.1141	0.0703	0.1153
	2675	0.0959	0.1141	0.1684	0.1711	0.1669	0.1632	0.1189	0.117	0.1138
	26833	0.0953	0.113	0.1693	0.1696	0.1637	0.1769	0.1279	0.1186	0.1121
	26917	0.0947	0.1116	0.1653	0.162	0.1557	0.1978	0.1403	0.1199	0.1124
	2.7	0.0942	0.1107	0.1589	0.1536	0.1475	0.2078	0.154	0.1243	0.1147
	27083	0.0941	0.1096	0.1531	0.1458	0.1408	0.2027	0.1728	0.1318	0.1189
	27167	0.0933	0.1086	0.1466	0.1403	0.1354	0.1916	0.1846	0.1432	0.1258
	2725	0.093	0.1078	0.1418	0.1353	0.1313	0.18	0.1933	0.1542	0.1344
	27333	0.0925	0.1072	0.1379	0.1316	0.1281	0.1705	0.1971	0.1627	0.142
	27417	0.0925	0.1066	0.1344	0.1287	0.1258	0.163	0.1991	0.1676	0.1485
	2.75	0.0922	0.1061	0.1319	0.1263	0.1237	0.1571	0.2012	0.1699	0.1528
	27583	0.0919	0.1054	0.1298	0.1247	0.1225	0.1528	0.2032	0.1714	0.1568
	27667	0.0919	0.1048	0.1283	0.1234	0.1212	0.1495	0.2053	0.1724	0.1592
	2775	0.0918	0.1044	0.1273	0.1225	0.1205	0.147	0.2087	0.1725	0.1614
	27833	0.0918	0.1041	0.1267	0.1218	0.1199	0.1452	0.2126	0.173	0.164
	27917	0.0918	0.1043	0.1266	0.1212	0.1197	0.1438	0.218	0.1733	0.1661
	2.8	0.0916	0.1038	0.1269	0.1212	0.1197	0.1429	0.225	0.1739	0.1678
	28083	0.0918	0.1035	0.1272	0.1212	0.1197	0.1421	0.2345	0.1749	0.1708
	28167	0.0921	0.1034	0.1286	0.1215	0.1203	0.1418	0.2447	0.1766	0.1743
	2825	0.0919	0.1035	0.1305	0.1221	0.1211	0.1415	0.2538	0.1792	0.1791
	28333	0.0922	0.1035	0.133	0.1229	0.1218	0.1415	0.2609	0.1824	0.185
	28417	0.0925	0.1037	0.1366	0.1238	0.1232	0.1417	0.2663	0.1872	0.1923
	2.85	0.093	0.1037	0.1417	0.126	0.1249	0.1418	0.2705	0.193	0.2012
	28583	0.0935	0.104	0.1472	0.1275	0.1272	0.1426	0.2741	0.1997	0.21
	28667	0.0941	0.1041	0.1539	0.1301	0.1298	0.1435	0.2769	0.2081	0.2184
	2875	0.0945	0.1044	0.16	0.1333	0.1333	0.1449	0.279	0.2168	0.2251
	28833	0.0953	0.1049	0.1647	0.1374	0.1379	0.1461	0.2807	0.2247	0.2305
	28917	0.0961	0.1054	0.1685	0.1427	0.1432	0.1484	0.2815	0.232	0.2354
	2.9	0.0968	0.1061	0.1705	0.1493	0.1498	0.1508	0.2824	0.237	0.2395
	29083	0.0985	0.1066	0.1717	0.1572	0.1572	0.154	0.283	0.2413	0.2424
	29167	0.0999	0.1072	0.1725	0.1664	0.1667	0.1589	0.2827	0.2448	0.2447
	2925	0.1017	0.1086	0.173	0.1754	0.1766	0.1646	0.2822	0.2479	0.2453
	29333	0.1031	0.1095	0.1734	0.1826	0.1853	0.1728	0.2816	0.2505	0.245
	29417	0.1052	0.1109	0.1734	0.1879	0.191	0.1838	0.2808	0.2529	0.2445
	2.95	0.107	0.113	0.1737	0.1907	0.1945	0.1975	0.2798	0.2546	0.2441
	29583	0.1096	0.1151	0.1737	0.1917	0.1963	0.2102	0.2786	0.2554	0.243
	29667	0.1124	0.1182	0.1737	0.1926	0.1966	0.2195	0.2775	0.2555	0.2424
	2975	0.116	0.1217	0.1739	0.1933	0.1965	0.2242	0.2755	0.2547	0.2416
	29833	0.1205	0.1267	0.174	0.1937	0.1948	0.2268	0.2749	0.2534	0.2409
	29917	0.1257	0.1321	0.174	0.1939	0.1948	0.2282	0.2741	0.252	0.2403
	3	0.1327	0.138	0.1742	0.1942	0.1946	0.2296	0.2734	0.2508	0.2392
	30083	0.1412	0.1458	0.1742	0.1945	0.1943	0.2303	0.2723	0.2496	0.2383
	30167	0.1504	0.1545	0.1743	0.1948	0.194	0.2308	0.2712	0.2485	0.2374
	3025	0.1606	0.164	0.1743	0.1948	0.194	0.2317	0.2708	0.2473	0.2363
	30333	0.1713	0.1778	0.1745	0.1952	0.1939	0.2326	0.2703	0.2459	0.2355
	30417	0.1821	0.1943	0.1745	0.1952	0.1937	0.2331	0.2694	0.2448	0.2348
	3.05	0.1936	0.2082	0.1746	0.1955	0.1937	0.2337	0.2686	0.2439	0.2337
	30583	0.2044	0.2206	0.1749	0.1963	0.1937	0.2343	0.2682	0.2425	0.2328
	30667	0.2094	0.2264	0.1746	0.1963	0.1934	0.2348	0.2676	0.2418	0.2322
	3075	0.2113	0.2238	0.1748	0.1966	0.1936	0.2354	0.267	0.2409	0.2316
	30833	0.2105	0.2204	0.1749	0.1966	0.1934	0.2357	0.2663	0.2401	0.2302
	30917	0.2078	0.2175	0.1748	0.1969	0.1934	0.2364	0.2654	0.2392	0.2297
	3.1	0.2045	0.2172	0.1751	0.1972	0.1936	0.2367	0.2639	0.2374	0.2288
	31083	0.2018	0.2155	0.1749	0.1974	0.1933	0.2374	0.2631	0.2367	0.2284
	31167	0.1994	0.2131	0.1751	0.1975	0.1933	0.2378	0.2633	0.236	0.2276
	3125	0.1972	-0.1379	0.1752	0.1978	0.1933	0.2381	0.263	0.2354	0.227
	31333	-0.1133	-0.1254	0.1752	0.1983	0.1933	0.2384	0.2625	0.2348	0.2262
	31417	-0.1092	-0.1231	-0.1043	-0.1313	-0.1369	0.2389	-0.0967	0.2337	0.2256
	3.15	-0.1044	-0.1229	-0.1229	-0.1333	-0.142	0.2395	-0.1171	0.2331	0.2256
	31583	-0.1023	-0.1232	-0.1183	-0.1334	-0.1456	0.2396	-0.1122	0.2323	-0.0684
	31667	-0.1015	-0.1232	-0.1177	-0.1414	-0.1504	0.2401	-0.1118	0.2319	-0.1131
	31667	-0.1009	-0.1229	-0.1214	-0.1569	-0.1547	-0.1752	-0.1127	-0.0649	-0.1141
	31707	-0.1003	-0.1223	-0.1316	-0.1652	-0.1568	-0.1865	-0.1165	-0.115	-0.1125
	31791	-0.0999	-0.1217	-0.1431	-0.163	-0.1537	-0.2059	-0.1218	-0.1257	-0.1121
	31874	-0.0994	-0.1209	-0.1455	-0.1557	-0.1478	-0.2172	-0.1296	-0.1307	-0.113
	31957	-0.0988	-0.1192	-0.1453	-0.1478	-0.1417	-0.2163	-0.138	-0.1359	-0.1173
	32041	-0.0983	-0.1186	-0.1427	-0.1403	-0.136	-0.2073	-0.147	-0.1429	-0.125
	32124	-0.0977	-0.1176	-0.1398	-0.1348	-0.1318	-0.1957	-0.1545	-0.1505	-0.1371
	32207	-0.097	-0.1168	-0.1365	-0.1299	-0.1276	-0.1844	-0.1595	-0.1566	-0.1502
	32291	-0.0964	-0.1157	-0.1331	-0.1263	-0.1247	-0.1765	-0.1623	-0.162	-0.1572
	32374	-0.0956	-0.1148	-0.1301	-0.1235	-0.1221	-0.1701	-0.1643	-0.1655	-0.1601
	32457	-0.0953	-0.1142	-0.1278	-0.1209	-0.1203	-0.1655	-0.1653	-0.1681	-0.162
	32541	-0.0944	-0.1138	-0.125	-0.1191	-0.1189	-0.1615	-0.1661	-0.1691	-0.163
	32624	-0.0939	-0.113	-0.1235	-0.1177	-0.1177	-0.1589	-0.1678	-0.1702	-0.164
	32707	-0.093	-0.1122	-0.1217	-0.1167	-0.1168	-0.1542	-0.1693	-0.1713	-0.1655
	32791	-0.0927	-0.1118	-0.1203	-0.1159	-0.116	-0.1524	-0.1714	-0.172	-0.1678
	32874	-0.0921	-0.1113	-0.1196	-0.1153	-0.1157	-0.1507	-0.1748	-0.1734	-0.1707
	32957	-0.0918	-0.1107	-0.1192	-0.115	-0.1157	-0.1499	-0.1786	-0.1748	-0.1743
	33041	-0.0913	-0.1104	-0.1188	-0.1147	-0.1157	-0.1492	-0.1841	-0.1769	-0.1791
	33124	-0.0912	-0.1099	-0.1188	-0.1148	-0.1157	-0.1487	-0.1916	-0.1791	-0.1859
	33207	-0.0909	-0.1099	-0.1188	-0.1151	-0.1164	-0.1482	-0.2012	-0.1818	-0.1943
	33291	-0.0906	-0.1095	-0.1194	-0.1154	-0.117	-0.1481	-0.212	-0.1853	-0.2032
	33374	-0.0904	-0.1095	-0.1203	-0.1162	-0.1177	-0.1481	-0.2218	-0.1901	-0.2117
	33457	-0.0904	-0.1093	-0.1217	-0.1171	-0.1189	-0.1482	-0.2297	-0.1939	-0.2203
	33541	-0.0906	-0.1092	-0.1235	-0.1186	-0.1206	-0.1487	-0.2355	-0.2006	-0.2271
	33624	-0.0909	-0.1093	-0.1261	-0.1202	-0.1221	-0.149	-0.2398	-0.2087	-0.2328
	33707	-0.0907	-0.1098	-0.1293	-0.122	-0.1243	-0.1478	-0.2445	-0.2169	-0.2366
	33791	-0.0909	-0.1099	-0.1334	-0.124	-0.1275	-0.149	-0.2483	-0.2255	-0.2393
	33874	-0.0912	-0.1101	-0.1383	-0.1266	-0.1305	-0.151	-0.2508	-0.234	-0.2413
	33957	-0.0918	-0.1104	-0.1435	-0.1301	-0.1347	-0.153	-0.2525	-0.2406	-0.243
	34041	-0.0922	-0.1107	-0.1476	-0.1334	-0.1394	-0.1559	-0.254	-0.2462	-0.2448
	34124	-0.0927	-0.1112	-0.151	-0.1376	-0.145	-0.1592	-0.2544	-0.2496	-0.2464
	34207	-0.0938	-0.1118	-0.1534	-0.1415	-0.1502	-0.1632	-0.2547	-0.2532	-0.247
	34291	-0.0948	-0.1125	-0.1547	-0.1452	-0.1545	-0.1685	-0.254	-0.256	-0.2476
	34374	-0.0959	-0.1131	-0.1556	-0.1482	-0.1577	-0.1746	-0.2528	-0.2586	-0.248
	34457	-0.097	-0.1144	-0.1556	-0.1505	-0.1598	-0.181	-0.2508	-0.2607	-0.248
	34541	-0.0985	-0.1159	-0.1557	-0.1516	-0.1606	-0.1868	-0.2502	-0.2621	-0.2476
	34624	-0.1003	-0.1174	-0.156	-0.1524	-0.1609	-0.1907	-0.2502	-0.2622	-0.2476
	34707	-0.1026	-0.1192	-0.1562	-0.1524	-0.1608	-0.192	-0.2493	-0.2605	-0.2473
	34791	-0.1052	-0.1221	-0.1562	-0.1527	-0.1606	-0.1926	-0.2486	-0.258	-0.2468
	34874	-0.1083	-0.1258	-0.1563	-0.1525	-0.1603	-0.1928	-0.2479	-0.2595	-0.2464
	34957	-0.1121	-0.1308	-0.1565	-0.1528	-0.1572	-0.193	-0.2473	-0.2587	-0.2453
	35041	-0.1167	-0.1379	-0.1566	-0.1527	-0.1571	-0.193	-0.2462	-0.2575	-0.2436
	35124	-0.1232	-0.1478	-0.1569	-0.1525	-0.1569	-0.1931	-0.2453	-0.2567	-0.2432
	35207	-0.1318	-0.1627	-0.1569	-0.153	-0.1571	-0.1931	-0.245	-0.254	-0.2425
	35291	-0.1447	-0.1843	-0.1569	-0.1527	-0.1568	-0.1933	-0.245	-0.2535	-0.2412
	35374	-0.1661	-0.2081	-0.1572	-0.1531	-0.1568	-0.1936	-0.2427	-0.2512	-0.2392
	35457	-0.1901	-0.2186	-0.1577	-0.1531	-0.1568	-0.1937	-0.2419	-0.2508	-0.2387
	35541	-0.2044	-0.2197	-0.1582	-0.1534	-0.1568	-0.1934	-0.2415	-0.2505	-0.2383
	35624	-0.2079	-0.2177	-0.1582	-0.1536	-0.1568	-0.1937	-0.2403	-0.2502	-0.2378
	35707	-0.2088	-0.2148	-0.1586	-0.1534	-0.1568	-0.1939	-0.2401	-0.249	-0.2374
	35791	-0.2082	-0.212	-0.1588	-0.1534	-0.1569	-0.1937	-0.2395	-0.2485	-0.2369
	35874	-0.207	-0.2093	-0.1591	-0.1537	-0.1571	-0.1939	-0.2386	-0.2474	-0.2364
	35957	-0.2052	-0.2067	-0.1592	-0.1539	-0.1571	-0.194	-0.238	-0.2465	-0.2358
	36041	-0.2035	-0.2044	-0.1594	-0.1537	-0.1572	-0.1942	-0.2375	-0.2456	-0.2363
	36124	-0.2015	-0.2021	-0.1594	-0.154	-0.1572	-0.194	-0.237	-0.2453	-0.2425
	36207	-0.1991	0.1327	-0.1598	-0.1545	-0.1574	-0.1943	-0.2366	-0.2448	-0.2425
	36291	0.1058	0.1437	-0.1597	-0.1543	-0.1577	-0.1945	-0.2357	-0.2441	-0.2421
	36374	0.1124	0.1371	0.0915	0.0948	0.1005	-0.1946	0.0655	-0.2433	-0.2424
	36457	0.1058	0.1337	0.118	0.1189	0.1258	-0.1949	0.1096	-0.2427	-0.2421
	36541	0.1028	0.131	0.1167	0.1209	0.1301	-0.1945	0.1121	-0.2419	0.0677
	36624	0.1008	0.1289	0.1183	0.1243	0.1341	-0.1946	0.1127	-0.2413	0.1102
	36667	0.0991	0.1267	0.126	0.1307	0.1385	0.1374	0.1154	-0.2413	0.1116
	36667	0.098	0.1247	0.1354	0.1411	0.1417	0.1542	0.1212	0.0634	0.1124
	3675	0.0967	0.1226	0.1452	0.1482	0.1432	0.1637	0.1315	0.1127	0.1127
	36833	0.0958	0.1214	0.147	0.1485	0.1423	0.1745	0.1443	0.1173	0.1148
	36917	0.095	0.1197	0.1455	0.146	0.1395	0.1827	0.1691	0.1206	0.1179
	3.7	0.0942	0.1183	0.1432	0.1417	0.1363	0.1861	0.1814	0.1266	0.1229
	37083	0.0933	0.1173	0.1398	0.1379	0.1322	0.1843	0.1872	0.1359	0.1299
	37167	0.0929	0.1165	0.1362	0.1344	0.1289	0.1798	0.1917	0.1478	0.1365
	3725	0.0922	0.1151	0.1339	0.1313	0.1257	0.1746	0.1936	0.1569	0.1424
	37333	0.0916	0.1144	0.1313	0.129	0.1232	0.1698	0.1951	0.1621	0.1478
	37417	0.0913	0.1135	0.1289	0.1269	0.1214	0.1649	0.1962	0.1644	0.1513
	3.75	0.0909	0.113	0.127	0.1249	0.1194	0.1609	0.1972	0.1658	0.1537
	37583	0.0906	0.1119	0.1255	0.1238	0.1183	0.1575	0.1987	0.1666	0.1557
	37667	0.0901	0.111	0.1243	0.1228	0.1174	0.1551	0.2012	0.1672	0.158
	3775	0.0896	0.1107	0.1234	0.1221	0.1168	0.1528	0.2035	0.1678	0.16
	37833	0.0895	0.1101	0.1231	0.1218	0.116	0.151	0.2062	0.1681	0.1623
	37917	0.0893	0.1098	0.1226	0.1215	0.1159	0.1495	0.2096	0.1681	0.1638
	3.8	0.0892	0.1092	0.1226	0.1215	0.1159	0.1485	0.2139	0.1685	0.1655
	38083	0.0892	0.1089	0.1228	0.1217	0.1162	0.1478	0.2187	0.1688	0.1673
	38167	0.0892	0.1078	0.1237	0.1221	0.1167	0.1473	0.2245	0.1698	0.1695
	3825	0.0893	0.1078	0.1244	0.1228	0.1173	0.1467	0.2306	0.1708	0.1719
	38333	0.0895	0.1075	0.1257	0.1237	0.1182	0.1467	0.2369	0.1725	0.1751
	38417	0.0893	0.1075	0.1272	0.125	0.1192	0.1469	0.2427	0.1745	0.1781
	3.85	0.0896	0.1077	0.1292	0.1267	0.1211	0.1473	0.2486	0.1771	0.1821
	38583	0.09	0.1075	0.1321	0.1287	0.1232	0.1481	0.2543	0.1801	0.1867
	38667	0.09	0.1073	0.1353	0.1313	0.1257	0.1487	0.2587	0.1836	0.1922
	3875	0.0907	0.1075	0.1383	0.1339	0.1287	0.1498	0.2631	0.1876	0.1981
	38833	0.091	0.1077	0.1412	0.1376	0.1324	0.1507	0.2665	0.1923	0.2042
	38917	0.0918	0.108	0.1435	0.1415	0.1369	0.1525	0.2702	0.1971	0.2096
	3.9	0.0922	0.1083	0.1453	0.147	0.1421	0.155	0.2729	0.2018	0.2151
	39083	0.093	0.1089	0.1463	0.1524	0.1476	0.1579	0.2744	0.2067	0.22
	39167	0.0941	0.1095	0.1467	0.1571	0.1534	0.1618	0.2753	0.211	0.2244
	3925	0.0951	0.1102	0.1469	0.1604	0.158	0.1667	0.2761	0.2145	0.228
	39333	0.0964	0.1113	0.1469	0.1627	0.1604	0.1727	0.2766	0.2178	0.2313
	39417	0.098	0.113	0.1469	0.1637	0.1615	0.1791	0.2767	0.221	0.2335
	3.95	0.0994	0.1147	0.1469	0.1635	0.162	0.1852	0.2763	0.2236	0.2355
	39583	0.1017	0.1173	0.1467	0.164	0.162	0.1888	0.2758	0.2262	0.2361
	39667	0.1044	0.1205	0.1467	0.1637	0.1617	0.1904	0.275	0.2294	0.2364
	3975	0.1077	0.1246	0.1469	0.1637	0.1615	0.1913	0.2743	0.2325	0.2363
	39833	0.1122	0.1299	0.1469	0.1637	0.1612	0.1914	0.2731	0.2357	0.2363
	39917	0.118	0.136	0.147	0.1635	0.1612	0.1914	0.2723	0.238	0.2357
	4	0.1261	0.1437	0.1472	0.1633	0.1611	0.1913	0.2715	0.2396	0.2352
	40083	0.1376	0.1531	0.147	0.1633	0.1604	0.1911	0.2705	0.2403	0.2343
	40167	0.1521	0.1647	0.1472	0.1635	0.1601	0.1907	0.2696	0.2398	0.2337
	4025	0.1687	0.1795	0.1473	0.1635	0.1604	0.1908	0.2686	0.2392	0.2328
	40333	0.1849	0.1984	0.1472	0.1633	0.1601	0.1907	0.2679	0.2384	0.2322
	40417	0.1952	0.2181	0.1475	0.1635	0.16	0.1908	0.2673	0.2374	0.2309
	4.05	0.2006	0.2233	0.1473	0.1637	0.16	0.191	0.2659	0.2364	0.2302
	40583	0.2041	0.2218	0.1475	0.1637	0.1598	0.191	0.2656	0.2352	0.2294
	40667	0.2041	0.2193	0.1476	0.1635	0.1598	0.1911	0.2645	0.2341	0.2288
	4075	0.2027	0.2166	0.1478	0.1637	0.1598	0.1908	0.2633	0.2331	0.2277
	40833	0.2009	0.2148	0.1476	0.1638	0.1597	0.1913	0.2622	0.2319	0.227
	40917	0.1987	0.2125	0.1476	0.1641	0.1598	0.191	0.2618	0.2309	0.2259
	4.1	0.1968	0.2102	0.1479	0.1641	0.1597	0.1913	0.2612	0.2299	0.2258
	41083	0.1949	0.2081	0.1478	0.1644	0.1598	0.1914	0.2609	0.2291	0.2251
	41167	0.1931	-0.1321	0.1482	0.1646	0.1595	0.1913	0.2605	0.2279	0.2241
	4125	-0.1067	-0.1284	0.1482	0.165	0.1598	0.1914	0.2598	0.2271	0.2235
	41333	-0.1102	-0.126	-0.0829	-0.1054	-0.1064	0.1917	-0.0929	0.2265	0.2229
	41417	-0.1061	-0.1258	-0.1131	-0.1235	-0.1254	0.192	-0.1156	0.2258	0.2222
	4.15	-0.1046	-0.1258	-0.1141	-0.125	-0.1312	0.1919	-0.1141	0.2244	-0.0654
	41583	-0.104	-0.1255	-0.1138	-0.129	-0.135	0.1919	-0.1142	0.2229	-0.1113
	41667	-0.1035	-0.1249	-0.1141	-0.135	-0.1383	-0.1341	-0.1165	0.2224	-0.1136
	41667	-0.1029	-0.1238	-0.1168	-0.1405	-0.14	-0.1583	-0.1214	-0.0608	-0.1135
	4172	-0.1025	-0.1226	-0.1214	-0.1429	-0.1406	-0.1704	-0.1302	-0.1109	-0.1138
	41804	-0.1019	-0.1215	-0.1273	-0.142	-0.1395	-0.1785	-0.1392	-0.1209	-0.1165
	41887	-0.1012	-0.1203	-0.1296	-0.1388	-0.1368	-0.1817	-0.1489	-0.1284	-0.1223
	4197	-0.1002	-0.1188	-0.1295	-0.1354	-0.1328	-0.1812	-0.1553	-0.1357	-0.1322
	42054	-0.0997	-0.1177	-0.1289	-0.1316	-0.1293	-0.1777	-0.1591	-0.144	-0.1461
	42137	-0.099	-0.1167	-0.1275	-0.1284	-0.1261	-0.1731	-0.1615	-0.151	-0.1586
	4222	-0.0983	-0.1154	-0.1257	-0.1254	-0.1232	-0.1678	-0.1635	-0.1568	-0.1667
	42304	-0.0977	-0.1141	-0.1241	-0.1229	-0.1212	-0.1629	-0.1647	-0.1611	-0.171
	42387	-0.0976	-0.1133	-0.1223	-0.1205	-0.1194	-0.1586	-0.1655	-0.1633	-0.173
	4247	-0.0968	-0.1118	-0.1208	-0.1192	-0.1177	-0.1553	-0.1667	-0.1653	-0.1746
	42554	-0.0962	-0.111	-0.1196	-0.1179	-0.1165	-0.1521	-0.1673	-0.1669	-0.176
	42637	-0.0958	-0.1101	-0.1183	-0.1168	-0.1154	-0.1498	-0.1681	-0.1681	-0.1772
	4272	-0.0953	-0.1092	-0.1176	-0.116	-0.115	-0.1478	-0.1698	-0.1693	-0.1791
	42804	-0.095	-0.1084	-0.1171	-0.1156	-0.1144	-0.1417	-0.1719	-0.1707	-0.1814
	42887	-0.0942	-0.1077	-0.1162	-0.1151	-0.1142	-0.1403	-0.1743	-0.1722	-0.1846
	4297	-0.0939	-0.107	-0.1157	-0.115	-0.1139	-0.1397	-0.1771	-0.1737	-0.1882
	43054	-0.0933	-0.1063	-0.1157	-0.1151	-0.1142	-0.1388	-0.1809	-0.1749	-0.1926
	43137	-0.093	-0.1057	-0.1157	-0.1153	-0.1144	-0.1385	-0.1847	-0.1772	-0.1969
	4322	-0.0925	-0.1051	-0.1157	-0.1153	-0.1148	-0.1383	-0.1893	-0.1795	-0.2012
	43304	-0.0921	-0.1044	-0.1164	-0.1157	-0.1156	-0.1382	-0.1942	-0.1817	-0.2056
	43387	-0.0921	-0.1037	-0.1168	-0.1165	-0.1164	-0.1382	-0.1997	-0.1838	-0.21
	4347	-0.0918	-0.1035	-0.1177	-0.1173	-0.1177	-0.1385	-0.2058	-0.1864	-0.2148
	43554	-0.0916	-0.1032	-0.1188	-0.1182	-0.1188	-0.1392	-0.2122	-0.1891	-0.2186
	43637	-0.0916	-0.1028	-0.1202	-0.1192	-0.1203	-0.1395	-0.2177	-0.1923	-0.2222
	4372	-0.0916	-0.1022	-0.1221	-0.1205	-0.122	-0.1405	-0.2233	-0.1958	-0.2259
	43804	-0.0915	-0.102	-0.1241	-0.122	-0.1238	-0.1417	-0.228	-0.2001	-0.2284
	43887	-0.0916	-0.1019	-0.1266	-0.1235	-0.1258	-0.1431	-0.2322	-0.2041	-0.2303
	4397	-0.0918	-0.102	-0.129	-0.1252	-0.1284	-0.1447	-0.2361	-0.209	-0.2325
	44054	-0.0921	-0.1023	-0.1305	-0.127	-0.1308	-0.1463	-0.2393	-0.2145	-0.2343
	44137	-0.0925	-0.1025	-0.1321	-0.1289	-0.1325	-0.1489	-0.2419	-0.2195	-0.2369
	4422	-0.093	-0.1028	-0.1327	-0.1302	-0.1345	-0.1507	-0.2433	-0.2242	-0.2393
	44304	-0.0936	-0.1031	-0.133	-0.1312	-0.1356	-0.1534	-0.2445	-0.2287	-0.2415
	44387	-0.0947	-0.1037	-0.1333	-0.1321	-0.136	-0.1562	-0.2444	-0.2328	-0.2432
	4447	-0.0958	-0.1044	-0.1333	-0.1324	-0.1363	-0.1582	-0.2444	-0.2369	-0.2442
	44554	-0.0971	-0.1055	-0.1334	-0.1324	-0.1362	-0.16	-0.2436	-0.2401	-0.2445
	44637	-0.0991	-0.107	-0.1334	-0.1322	-0.1362	-0.1608	-0.2435	-0.2421	-0.2447
	4472	-0.1015	-0.109	-0.1334	-0.1321	-0.1362	-0.1612	-0.2432	-0.2445	-0.2448
	44804	-0.1044	-0.1115	-0.1334	-0.1322	-0.136	-0.1611	-0.2413	-0.2461	-0.2448
	44887	-0.1084	-0.115	-0.1333	-0.1319	-0.1357	-0.1609	-0.241	-0.2474	-0.2445
	4497	-0.1136	-0.1202	-0.1334	-0.1318	-0.1356	-0.1609	-0.2404	-0.2488	-0.2445
	45054	-0.1211	-0.1292	-0.1334	-0.1313	-0.1353	-0.1609	-0.2393	-0.2493	-0.2438
	45137	-0.1313	-0.1418	-0.1336	-0.1315	-0.1351	-0.1608	-0.2386	-0.2493	-0.2432
	4522	-0.1475	-0.1609	-0.1334	-0.1315	-0.1348	-0.1608	-0.2378	-0.249	-0.2421
	45304	-0.1681	-0.187	-0.1336	-0.1313	-0.135	-0.1604	-0.2366	-0.2488	-0.2412
	45387	-0.1879	-0.1987	-0.1337	-0.1313	-0.1347	-0.1604	-0.2363	-0.2477	-0.2404
	4547	-0.1984	-0.2007	-0.1334	-0.1312	-0.1344	-0.1601	-0.2357	-0.2471	-0.2396
	45554	-0.2016	-0.1998	-0.1336	-0.1312	-0.1344	-0.1601	-0.2345	-0.2445	-0.2381
	45637	-0.2036	-0.1978	-0.1337	-0.131	-0.1344	-0.16	-0.2343	-0.2442	-0.2377
	4572	-0.2036	-0.1954	-0.1337	-0.1308	-0.1342	-0.1601	-0.2335	-0.2433	-0.2372
	45804	-0.2023	-0.1937	-0.1336	-0.1308	-0.1336	-0.1601	-0.2326	-0.2435	-0.2364
	45887	-0.201	-0.1916	-0.1337	-0.1307	-0.1337	-0.1601	-0.232	-0.2425	-0.2363
	4597	-0.1991	-0.1897	-0.1339	-0.1307	-0.1336	-0.1601	-0.2309	-0.2418	-0.2354
	46054	-0.1977	-0.1879	-0.1339	-0.1305	-0.1336	-0.16	-0.2303	-0.2399	-0.2343
	46137	-0.1962	0.1173	-0.1342	-0.1308	-0.1334	-0.1601	-0.2299	-0.2392	-0.2337
	4622	0.102	0.1328	-0.1342	-0.1304	-0.1334	-0.1601	-0.2288	-0.2393	-0.2334
	46304	0.1135	0.1272	0.0706	0.0729	0.078	-0.1601	0.0611	-0.2383	-0.2332
	46387	0.1078	0.1237	0.104	0.1012	0.1086	-0.1604	0.1087	-0.2375	-0.2326
	4647	0.1048	0.1212	0.1078	0.1061	0.1141	-0.1603	0.1118	-0.236	0.0649
	46554	0.1023	0.1189	0.1102	0.1104	0.1176	-0.1604	0.1124	-0.2338	0.1061
	46637	0.1006	0.1162	0.1131	0.1135	0.1199	0.1038	0.1151	-0.2341	0.1098
	46667	0.0991	0.1142	0.1173	0.118	0.1218	0.1295	0.12	-0.2338	0.1115
	46667	0.098	0.1124	0.1221	0.122	0.1229	0.1371	0.1305	0.0642	0.1113
	4675	0.0965	0.1107	0.1273	0.1257	0.1243	0.1431	0.1475	0.1142	0.113
	46833	0.0958	0.1095	0.1293	0.127	0.125	0.1485	0.1682	0.1196	0.1154
	46917	0.0951	0.1081	0.1289	0.1276	0.1249	0.153	0.1798	0.1241	0.1192
	4.7	0.0944	0.107	0.1278	0.1276	0.1243	0.1556	0.1836	0.1305	0.1241
	47083	0.0939	0.106	0.126	0.1266	0.1232	0.1565	0.1868	0.1373	0.1304
	47167	0.093	0.1051	0.1247	0.1254	0.1217	0.1559	0.1885	0.146	0.136
	4725	0.0924	0.1044	0.1234	0.1243	0.1205	0.1551	0.1902	0.1551	0.1409
	47333	0.0922	0.1032	0.1218	0.1232	0.1191	0.1534	0.1913	0.1627	0.1455
	47417	0.0918	0.1028	0.1206	0.1226	0.1183	0.1518	0.1926	0.1667	0.1487
	4.75	0.0915	0.1019	0.1194	0.1218	0.1173	0.1504	0.194	0.169	0.1514
	47583	0.0912	0.1015	0.1186	0.1211	0.1165	0.149	0.196	0.1707	0.1533
	47667	0.0912	0.1008	0.1179	0.1206	0.1159	0.1475	0.1978	0.1716	0.1545
	4775	0.0907	0.1005	0.1173	0.1202	0.1154	0.1464	0.2	0.1727	0.156
	47833	0.0901	0.1	0.117	0.1202	0.1153	0.1452	0.2021	0.1733	0.1572
	47917	0.0901	0.0999	0.1167	0.1203	0.1151	0.1447	0.2044	0.174	0.1588
	4.8	0.0901	0.0994	0.1164	0.1203	0.1153	0.1441	0.2067	0.1742	0.1603
	48083	0.09	0.0991	0.1164	0.1208	0.1154	0.1435	0.209	0.1745	0.1615
	48167	0.0898	0.0991	0.1168	0.1214	0.116	0.1434	0.2128	0.1752	0.1632
	4825	0.0898	0.0988	0.1173	0.1226	0.1168	0.1435	0.2172	0.1762	0.1653
	48333	0.0898	0.0988	0.1177	0.1235	0.1177	0.1437	0.2215	0.1774	0.167
	48417	0.09	0.0985	0.1185	0.1249	0.1186	0.1438	0.2267	0.1789	0.1696
	4.85	0.09	0.0986	0.1196	0.126	0.1202	0.1446	0.2325	0.1807	0.1716
	48583	0.0906	0.099	0.1208	0.1281	0.122	0.1452	0.2384	0.1827	0.174
	48667	0.0907	0.099	0.1221	0.1299	0.1241	0.146	0.2435	0.1846	0.1768
	4875	0.091	0.0993	0.1237	0.1325	0.127	0.1469	0.2488	0.187	0.1798
	48833	0.0913	0.0996	0.125	0.1353	0.1299	0.1485	0.2523	0.1896	0.1833
	48917	0.0918	0.1002	0.126	0.1379	0.1333	0.1501	0.256	0.192	0.1868
	4.9	0.0924	0.1005	0.1267	0.1411	0.1365	0.1522	0.258	0.1949	0.1907
	49083	0.0929	0.1012	0.1272	0.1434	0.1391	0.1543	0.2604	0.1977	0.1948
	49167	0.0939	0.1023	0.1275	0.1443	0.1409	0.1569	0.2625	0.2006	0.1991
	4925	0.095	0.1032	0.1275	0.1446	0.1418	0.1598	0.2644	0.2035	0.203
	49333	0.0961	0.1044	0.1273	0.1444	0.142	0.1629	0.2653	0.2061	0.2071
	49417	0.0976	0.1063	0.1273	0.1446	0.1418	0.1655	0.2662	0.2087	0.2113
	4.95	0.0994	0.1083	0.1275	0.1441	0.1415	0.1669	0.2667	0.2111	0.2149
	49583	0.1014	0.111	0.1272	0.144	0.1411	0.1679	0.2667	0.2131	0.2178
	49667	0.1043	0.1142	0.1272	0.144	0.1408	0.1682	0.2668	0.2145	0.2201
	4975	0.1072	0.1189	0.127	0.1437	0.1406	0.1684	0.2663	0.2161	0.2216
	49833	0.1116	0.1252	0.127	0.1434	0.1405	0.1684	0.2656	0.2183	0.2229
	49917	0.1171	0.1344	0.1267	0.1431	0.1403	0.1682	0.265	0.2204	0.2235
	5	0.1258	0.1449	0.1267	0.1432	0.1398	0.1681	0.2638	0.223	0.2245
	50083	0.1394	0.1591	0.1267	0.1429	0.1397	0.1682	0.263	0.2258	0.2244
	50167	0.1562	0.1769	0.1264	0.1426	0.1394	0.1679	0.2618	0.2287	0.2244
	5025	0.1716	0.1968	0.1269	0.1424	0.1392	0.1676	0.2612	0.2317	0.2239
	50333	0.1806	0.2078	0.1266	0.1426	0.1389	0.1675	0.2605	0.2348	0.2235
	50417	0.1876	0.2088	0.1266	0.1423	0.1386	0.1676	0.2596	0.237	0.223
	5.05	0.1922	0.2081	0.1263	0.1421	0.1385	0.1675	0.2587	0.2378	0.2226
	50583	0.1939	0.2061	0.1263	0.1421	0.1382	0.1673	0.2573	0.2378	0.2221
	50667	0.1946	0.2042	0.1261	0.142	0.1382	0.1672	0.2567	0.2372	0.2215
	5075	0.1942	0.2029	0.1263	0.1418	0.138	0.1672	0.2561	0.2363	0.2207
	50833	0.1931	0.2013	0.1263	0.1417	0.1379	0.1672	0.2555	0.2357	0.2198
	50917	0.1916	0.1995	0.1263	0.1418	0.1374	0.167	0.2549	0.2343	0.2192
	5.1	0.1902	0.198	0.1261	0.1415	0.1373	0.1669	0.2537	0.2334	0.2187
	51083	0.1888	-0.1209	0.1261	0.1414	0.1371	0.1669	0.2534	0.2325	0.2175
	51167	-0.1014	-0.1252	0.1263	0.1414	0.1369	0.1667	0.2529	0.2317	0.2161
	5125	-0.1125	-0.1223	-0.0637	-0.0838	-0.0849	0.1669	-0.0887	0.2306	0.2158
	51333	-0.1078	-0.1221	-0.0974	-0.1113	-0.1124	0.1667	-0.1165	0.23	0.2148
	51417	-0.1063	-0.122	-0.1029	-0.115	-0.1189	0.1667	-0.1133	0.2291	-0.0631
	5.15	-0.1055	-0.1214	-0.106	-0.1188	-0.1229	0.1667	-0.1118	0.2284	-0.1073
	51583	-0.1048	-0.1203	-0.1083	-0.1226	-0.1252	-0.1106	-0.1131	0.2276	-0.1106
	51667	-0.1037	-0.1191	-0.1104	-0.1254	-0.1263	-0.1412	-0.1167	0.2268	-0.1112
	51667	-0.1026	-0.1173	-0.1127	-0.127	-0.1272	-0.1498	-0.1241	-0.0698	-0.1119
	51721	-0.1015	-0.1159	-0.1151	-0.1278	-0.1275	-0.156	-0.1337	-0.12	-0.1144
	51804	-0.1008	-0.1145	-0.1176	-0.1275	-0.127	-0.1597	-0.1434	-0.1295	-0.1194
	51888	-0.0999	-0.1135	-0.118	-0.1269	-0.1257	-0.1612	-0.1496	-0.1348	-0.1276
	51971	-0.0994	-0.1122	-0.1176	-0.1254	-0.1241	-0.1614	-0.1534	-0.14	-0.1391
	52054	-0.0986	-0.111	-0.117	-0.1237	-0.1225	-0.1603	-0.1553	-0.1463	-0.1524
	52138	-0.098	-0.1102	-0.1162	-0.122	-0.1208	-0.1586	-0.1557	-0.1539	-0.1603
	52221	-0.0976	-0.1093	-0.115	-0.1203	-0.1191	-0.1569	-0.1568	-0.1603	-0.1653
	52304	-0.097	-0.1084	-0.1142	-0.1191	-0.1177	-0.155	-0.1572	-0.1644	-0.1678
	52388	-0.0967	-0.1077	-0.1131	-0.118	-0.1165	-0.1533	-0.1577	-0.1667	-0.1696
	52471	-0.0961	-0.1066	-0.1124	-0.1171	-0.1154	-0.1519	-0.1586	-0.1681	-0.1708
	52554	-0.0954	-0.106	-0.1118	-0.1162	-0.1145	-0.1504	-0.1595	-0.1693	-0.172
	52638	-0.0951	-0.1049	-0.111	-0.1157	-0.1139	-0.1495	-0.1604	-0.1701	-0.1739
	52721	-0.0948	-0.1044	-0.1106	-0.1148	-0.1135	-0.1484	-0.1618	-0.1711	-0.176
	52804	-0.0944	-0.1038	-0.1098	-0.1145	-0.1133	-0.1476	-0.1635	-0.1719	-0.1785
	52888	-0.0942	-0.1032	-0.1095	-0.1144	-0.113	-0.147	-0.1655	-0.1722	-0.1815
	52971	-0.0938	-0.1029	-0.1092	-0.1142	-0.1128	-0.1463	-0.1681	-0.1734	-0.1847
	53054	-0.0933	-0.1022	-0.1089	-0.1139	-0.1131	-0.1427	-0.1708	-0.174	-0.1882
	53138	-0.0932	-0.1017	-0.1089	-0.1142	-0.1135	-0.1423	-0.174	-0.1749	-0.1911
	53221	-0.093	-0.1011	-0.1087	-0.1142	-0.1135	-0.142	-0.1775	-0.1768	-0.1934
	53304	-0.0929	-0.1005	-0.1089	-0.1142	-0.1138	-0.142	-0.1812	-0.1781	-0.1963
	53388	-0.0927	-0.1002	-0.1089	-0.1145	-0.1141	-0.142	-0.1852	-0.1807	-0.1989
	53471	-0.0927	-0.0997	-0.1093	-0.1148	-0.1148	-0.1424	-0.1897	-0.1824	-0.2016
	53554	-0.0927	-0.0996	-0.1096	-0.115	-0.1154	-0.1424	-0.1943	-0.1847	-0.2044
	53638	-0.0929	-0.0996	-0.1102	-0.1153	-0.116	-0.1427	-0.1992	-0.1867	-0.2067
	53721	-0.0932	-0.0991	-0.1106	-0.1157	-0.1167	-0.1434	-0.2041	-0.1888	-0.2088
	53804	-0.0933	-0.099	-0.1112	-0.1164	-0.1176	-0.1438	-0.2088	-0.1914	-0.2107
	53888	-0.0935	-0.0965	-0.1119	-0.1167	-0.1182	-0.1446	-0.2132	-0.194	-0.2122
	53971	-0.0942	-0.0964	-0.1125	-0.1173	-0.1189	-0.1452	-0.2169	-0.1972	-0.2132
	54054	-0.0948	-0.0965	-0.113	-0.1179	-0.1196	-0.146	-0.2195	-0.2004	-0.2148
	54138	-0.0956	-0.0968	-0.1138	-0.1182	-0.1197	-0.1469	-0.2229	-0.2038	-0.2166
	54221	-0.0967	-0.0973	-0.1139	-0.1186	-0.1205	-0.1476	-0.2262	-0.205	-0.2186
	54304	-0.0979	-0.0977	-0.1142	-0.1185	-0.1205	-0.1487	-0.2293	-0.2093	-0.221
	54388	-0.0991	-0.0982	-0.1142	-0.1185	-0.1205	-0.1495	-0.2316	-0.2119	-0.2241
	54471	-0.1006	-0.0996	-0.1144	-0.1186	-0.1205	-0.1498	-0.2328	-0.2145	-0.227
	54554	-0.1025	-0.1008	-0.1144	-0.1185	-0.1205	-0.1501	-0.2332	-0.2171	-0.229
	54638	-0.1052	-0.1026	-0.1145	-0.1185	-0.1205	-0.1504	-0.2335	-0.2198	-0.2305
	54721	-0.1087	-0.1048	-0.1145	-0.1182	-0.1203	-0.1505	-0.2332	-0.2224	-0.2319
	54804	-0.1133	-0.1081	-0.1147	-0.1182	-0.12	-0.1504	-0.2326	-0.2248	-0.2328
	54888	-0.1199	-0.1141	-0.1145	-0.1179	-0.1199	-0.1504	-0.232	-0.2274	-0.2329
	54971	-0.1302	-0.1225	-0.1145	-0.1179	-0.1197	-0.1504	-0.2308	-0.2303	-0.2331
	55054	-0.144	-0.1354	-0.1145	-0.1176	-0.1197	-0.1502	-0.2305	-0.2332	-0.2332
	55138	-0.1615	-0.1556	-0.1144	-0.1173	-0.1192	-0.1504	-0.2291	-0.2354	-0.2329
	55221	-0.1814	-0.1778	-0.1144	-0.1171	-0.1191	-0.1501	-0.2285	-0.2367	-0.2326
	55304	-0.1916	-0.1881	-0.1145	-0.1168	-0.1189	-0.1502	-0.2276	-0.238	-0.2322
	55388	-0.1962	-0.1908	-0.1145	-0.117	-0.1188	-0.1499	-0.227	-0.2381	-0.2314
	55471	-0.1974	-0.1897	-0.1142	-0.1167	-0.1185	-0.1499	-0.2264	-0.2381	-0.2308
	55554	-0.1974	-0.1887	-0.1142	-0.1165	-0.1185	-0.1498	-0.2256	-0.2374	-0.2299
	55638	-0.1966	-0.187	-0.1141	-0.1164	-0.1183	-0.1496	-0.225	-0.2363	-0.2288
	55721	-0.1954	-0.1855	-0.1141	-0.1164	-0.1182	-0.1498	-0.2244	-0.2355	-0.2282
	55804	-0.1942	-0.1836	-0.1142	-0.1164	-0.118	-0.1495	-0.2239	-0.2348	-0.2276
	55888	-0.193	-0.1823	-0.1142	-0.1162	-0.118	-0.1493	-0.2232	-0.2337	-0.2268
	55971	-0.1914	-0.1812	-0.1142	-0.1159	-0.1179	-0.1458	-0.2226	-0.2325	-0.2264
	56054	-0.1904	0.108	-0.1142	-0.116	-0.1177	-0.1456	-0.2216	-0.2316	-0.2256
	56138	0.0948	0.1287	-0.1142	-0.1157	-0.1174	-0.1455	-0.2212	-0.2309	-0.225
	56221	0.1131	0.124	0.0523	0.057	0.0614	-0.1453	0.0602	-0.2302	-0.2242
	56304	0.1084	0.1206	0.0877	0.0881	0.0936	-0.145	0.1069	-0.2293	-0.2236
	56388	0.1054	0.1179	0.0944	0.0945	0.1	-0.1453	0.1098	-0.2282	0.0631
	56471	0.1031	0.1148	0.0996	0.0991	0.1037	-0.1453	0.1107	-0.2277	0.1069
	56554	0.1011	0.1122	0.1026	0.1026	0.1061	0.0869	0.113	-0.2265	0.1104
	56638	0.0993	0.1101	0.1057	0.1058	0.108	0.118	0.117	-0.2258	0.1115
	56667	0.0977	0.1081	0.1086	0.1089	0.1095	0.1249	0.1235	-0.2255	0.111
	56667	0.0962	0.1067	0.111	0.1119	0.1102	0.1293	0.1341	0.0623	0.1112
	56733	0.0954	0.1051	0.1125	0.1148	0.1109	0.1331	0.1464	0.1124	0.1131
	56816	0.095	0.104	0.1136	0.116	0.1115	0.136	0.1551	0.1183	0.116
	56899	0.0941	0.1029	0.1135	0.1168	0.1119	0.1383	0.1637	0.1211	0.1212
	56983	0.0933	0.1022	0.113	0.1174	0.1122	0.14	0.1673	0.1235	0.1272
	57066	0.093	0.1012	0.1124	0.1174	0.1122	0.1414	0.1785	0.1276	0.1325
	57149	0.0927	0.1005	0.1118	0.117	0.1122	0.1414	0.1801	0.1333	0.1368
	57233	0.0921	0.1	0.1113	0.1168	0.1118	0.1418	0.1809	0.1402	0.1402
	57316	0.0919	0.0993	0.1106	0.1168	0.1118	0.1414	0.1823	0.147	0.1434
	57399	0.0915	0.0988	0.1098	0.1165	0.1113	0.1408	0.1833	0.1533	0.1453
	57483	0.0915	0.0983	0.1095	0.1162	0.1112	0.1403	0.1849	0.1582	0.1467
	57566	0.0912	0.0979	0.1087	0.116	0.1109	0.1398	0.1862	0.1609	0.1481
	57649	0.0909	0.0976	0.1083	0.116	0.1109	0.1394	0.1879	0.1629	0.1489
	57733	0.0906	0.0974	0.108	0.1159	0.1109	0.1386	0.1896	0.1643	0.1498
	57816	0.0906	0.0973	0.1078	0.116	0.1107	0.1383	0.1907	0.1649	0.151
	57899	0.0906	0.097	0.1075	0.1164	0.111	0.1382	0.1922	0.1656	0.1522
	57983	0.0903	0.0967	0.1072	0.117	0.1112	0.138	0.1936	0.1666	0.1534
	58066	0.0901	0.0965	0.1072	0.1173	0.1115	0.1379	0.1952	0.1673	0.1553
	58149	0.0901	0.0965	0.1075	0.1179	0.1119	0.1379	0.1969	0.1679	0.1569
	58233	0.0901	0.0965	0.1072	0.1185	0.1122	0.1379	0.2	0.1688	0.1588
	58316	0.0904	0.0965	0.1075	0.1191	0.113	0.138	0.2026	0.1701	0.1608
	58399	0.0904	0.0967	0.1077	0.12	0.1138	0.1385	0.2056	0.1711	0.163
	58483	0.0906	0.0967	0.1081	0.1208	0.1148	0.1386	0.2094	0.1728	0.1656
	58566	0.0907	0.097	0.108	0.1218	0.116	0.1389	0.2136	0.1745	0.1675
	58649	0.091	0.0974	0.1084	0.1232	0.1171	0.1394	0.218	0.1763	0.1698
	58733	0.0915	0.0974	0.1086	0.1241	0.1185	0.1402	0.2219	0.1781	0.1722
	58816	0.0918	0.098	0.1092	0.1255	0.1199	0.1409	0.2255	0.1798	0.1745
	58899	0.0925	0.0986	0.1096	0.1263	0.1212	0.1417	0.2288	0.1818	0.1772
	58983	0.0932	0.0993	0.1098	0.1279	0.1223	0.1424	0.2323	0.1836	0.18
	59066	0.0941	0.1	0.1099	0.1292	0.1234	0.1434	0.2354	0.1853	0.1827
	59149	0.095	0.1009	0.1101	0.1295	0.124	0.1446	0.2384	0.1873	0.1855
	59233	0.0962	0.1019	0.1101	0.1298	0.1243	0.1455	0.2413	0.189	0.1882
	59316	0.0979	0.1034	0.1101	0.1298	0.1241	0.1464	0.2445	0.1907	0.1911
	59399	0.0994	0.1052	0.1101	0.1296	0.1244	0.1469	0.2473	0.1919	0.1943
	59483	0.1019	0.1075	0.1101	0.1298	0.1243	0.1478	0.2496	0.1933	0.1974
	59566	0.1044	0.1106	0.1099	0.1298	0.1241	0.1485	0.2511	0.1948	0.2007
	59649	0.1081	0.1142	0.1101	0.1296	0.1238	0.1489	0.2525	0.196	0.2033
	59733	0.1127	0.12	0.1098	0.1296	0.124	0.1489	0.2523	0.1974	0.2059
	59816	0.1199	0.1278	0.1099	0.1296	0.1235	0.149	0.2525	0.1987	0.2079
	59899	0.1299	0.1394	0.1099	0.1299	0.1235	0.149	0.252	0.2003	0.2093
	59983	0.144	0.1572	0.1098	0.1296	0.1231	0.149	0.2512	0.202	0.2108
	60066	0.1591	0.1818	0.1096	0.1295	0.1228	0.1487	0.2502	0.2035	0.2117
	60149	0.172	0.1962	0.1096	0.1296	0.1226	0.1487	0.2488	0.2056	0.2126
	60233	0.1803	0.2	0.1096	0.1295	0.1223	0.1487	0.2482	0.2082	0.2134
	60316	0.185	0.2006	0.1095	0.1293	0.1221	0.1485	0.2474	0.211	0.2139
	60399	0.187	0.1991	0.1093	0.1292	0.122	0.1485	0.2468	0.2145	0.214
	60483	0.1876	0.1978	0.1093	0.1292	0.1217	0.1485	0.2462	0.2181	0.2139
	60566	0.1878	0.1962	0.1093	0.129	0.1215	0.1485	0.2461	0.2215	0.2132
	60649	0.1867	0.1949	0.1092	0.1289	0.1212	0.1484	0.2451	0.2245	0.2131
	60733	0.1859	0.1934	0.1092	0.129	0.1211	0.1484	0.2445	0.2264	0.2125
	60816	0.1853	0.1923	0.109	0.1287	0.1209	0.1482	0.2444	0.2271	0.2122
	60899	0.1847	0.191	0.109	0.1287	0.1208	0.1479	0.2435	0.227	0.2114
	60983	0.1839	-0.1122	0.109	0.1284	0.1208	0.1479	0.2427	0.2261	0.2107
	61066	-0.0956	-0.1229	0.1089	0.1286	0.1206	0.1476	0.2424	0.2253	0.2102
	61149	-0.1135	-0.1205	-0.0475	-0.0704	-0.0678	0.1479	-0.084	0.2245	0.2096
	61233	-0.1087	-0.12	-0.0814	-0.1006	-0.0986	0.1476	-0.1116	0.2236	0.209
	61316	-0.1066	-0.1194	-0.0893	-0.106	-0.1057	0.1476	-0.1119	0.2229	-0.0607
	61399	-0.1055	-0.1185	-0.0941	-0.1095	-0.1102	0.1473	-0.111	0.2221	-0.1049
	61483	-0.1038	-0.1171	-0.0971	-0.1119	-0.1128	-0.0906	-0.1121	0.2212	-0.108
	61566	-0.1025	-0.1151	-0.0996	-0.1142	-0.1145	-0.1246	-0.1167	0.2204	-0.1087
	61649	-0.1009	-0.1135	-0.1014	-0.1157	-0.1151	-0.1324	-0.1234	0.2197	-0.1093
	61667	-0.0999	-0.1115	-0.1026	-0.1167	-0.1154	-0.1371	-0.1316	0.2195	-0.1118
	61667	-0.099	-0.1102	-0.1038	-0.1168	-0.1153	-0.1406	-0.1406	-0.0671	-0.1159
	6175	-0.0979	-0.1089	-0.1043	-0.1164	-0.115	-0.1424	-0.1464	-0.117	-0.1223
	61833	-0.0971	-0.1078	-0.1044	-0.116	-0.1142	-0.1434	-0.1498	-0.1234	-0.1321
	61917	-0.0965	-0.1067	-0.1044	-0.115	-0.1136	-0.1434	-0.1514	-0.1272	-0.1426
	6.2	-0.0959	-0.1058	-0.1043	-0.1141	-0.1128	-0.1431	-0.1528	-0.131	-0.1513
	62083	-0.0954	-0.1052	-0.1038	-0.1131	-0.1119	-0.1426	-0.154	-0.136	-0.1556
	62167	-0.0951	-0.1044	-0.1035	-0.1127	-0.1115	-0.1421	-0.155	-0.1417	-0.1589
	6225	-0.0948	-0.1037	-0.1031	-0.1119	-0.1107	-0.1415	-0.1556	-0.1478	-0.1614
	62333	-0.0944	-0.1034	-0.1026	-0.1113	-0.1101	-0.1411	-0.1565	-0.1528	-0.1627
	62417	-0.0941	-0.1028	-0.1022	-0.1107	-0.1096	-0.1403	-0.1572	-0.1557	-0.1638
	6.25	-0.0938	-0.1022	-0.1017	-0.1101	-0.1093	-0.1398	-0.158	-0.1574	-0.1655
	62583	-0.0932	-0.1014	-0.1014	-0.1096	-0.1087	-0.1395	-0.1589	-0.1592	-0.1675
	62667	-0.0932	-0.1009	-0.1011	-0.1093	-0.1084	-0.1394	-0.1603	-0.1603	-0.1696
	6275	-0.093	-0.1006	-0.1006	-0.109	-0.1081	-0.1389	-0.1617	-0.1615	-0.1714
	62833	-0.0927	-0.1002	-0.1005	-0.1086	-0.1081	-0.1391	-0.1635	-0.1627	-0.174
	62917	-0.0927	-0.0997	-0.1	-0.1086	-0.1078	-0.1388	-0.165	-0.1637	-0.1772
	6.3	-0.0921	-0.0996	-0.1	-0.1084	-0.1078	-0.1388	-0.1673	-0.1647	-0.1801
	63083	-0.0922	-0.099	-0.0999	-0.1086	-0.1078	-0.1388	-0.169	-0.1662	-0.182
	63167	-0.0919	-0.0991	-0.0996	-0.1081	-0.1077	-0.1389	-0.1714	-0.1676	-0.1838
	6325	-0.0921	-0.0983	-0.0994	-0.108	-0.1078	-0.1386	-0.174	-0.1695	-0.1853
	63333	-0.0921	-0.0982	-0.0993	-0.1078	-0.1078	-0.1388	-0.1766	-0.1716	-0.1868
	63417	-0.0922	-0.0977	-0.0994	-0.1077	-0.1078	-0.1389	-0.18	-0.1737	-0.1884
	6.35	-0.0924	-0.0976	-0.0993	-0.1078	-0.1078	-0.1392	-0.1836	-0.1759	-0.1899
	63583	-0.0927	-0.0976	-0.0991	-0.1078	-0.108	-0.1395	-0.187	-0.1785	-0.1914
	63667	-0.0932	-0.0976	-0.0991	-0.1077	-0.1081	-0.1397	-0.1907	-0.1806	-0.1926
	6375	-0.0936	-0.0974	-0.0993	-0.1077	-0.108	-0.1403	-0.1939	-0.1827	-0.1943
	63833	-0.0942	-0.0974	-0.0996	-0.1077	-0.1081	-0.1405	-0.1971	-0.1849	-0.1951
	63917	-0.095	-0.0979	-0.0994	-0.1077	-0.1083	-0.1409	-0.2001	-0.1872	-0.196
	6.4	-0.0958	-0.0979	-0.0994	-0.1077	-0.1083	-0.1411	-0.203	-0.1891	-0.1969
	64083	-0.0968	-0.0986	-0.0994	-0.1077	-0.1083	-0.1412	-0.2061	-0.1914	-0.1984
	64167	-0.098	-0.0993	-0.0994	-0.1075	-0.1083	-0.1415	-0.2091	-0.1809	-0.1997
	6425	-0.0997	-0.0999	-0.0997	-0.1073	-0.108	-0.1421	-0.2122	-0.1817	-0.2016
	64333	-0.1014	-0.1009	-0.0996	-0.1075	-0.1081	-0.142	-0.2152	-0.1835	-0.2039
	64417	-0.1041	-0.1028	-0.0996	-0.1075	-0.108	-0.1423	-0.2184	-0.1852	-0.2071
	6.45	-0.1073	-0.1048	-0.0994	-0.1077	-0.1081	-0.1426	-0.221	-0.1868	-0.2102
	64583	-0.1124	-0.1077	-0.0997	-0.1073	-0.1078	-0.1429	-0.2233	-0.189	-0.2132
	64667	-0.1188	-0.1116	-0.0999	-0.1075	-0.1078	-0.1427	-0.2244	-0.1902	-0.216
	6475	-0.1272	-0.1168	-0.0996	-0.1072	-0.108	-0.1427	-0.2251	-0.1923	-0.2177
	64833	-0.1397	-0.1238	-0.0996	-0.1072	-0.1078	-0.1431	-0.2251	-0.1945	-0.2197
	64917	-0.1572	-0.1341	-0.0997	-0.1072	-0.1067	-0.1432	-0.2248	-0.1968	-0.2213
	6.5	-0.1749	-0.1501	-0.0996	-0.1066	-0.1067	-0.138	-0.2244	-0.1992	-0.2219
	65083	-0.1861	-0.1708	-0.0997	-0.1069	-0.1064	-0.138	-0.2233	-0.202	-0.2227
	65167	-0.191	-0.1856	-0.0996	-0.1067	-0.1066	-0.138	-0.2222	-0.2053	-0.2226
	6525	-0.1917	-0.1885	-0.0994	-0.1066	-0.1063	-0.138	-0.2216	-0.2088	-0.223
	65333	-0.1916	-0.1882	-0.0996	-0.1064	-0.1063	-0.138	-0.2209	-0.212	-0.2227
	65417	-0.191	-0.187	-0.0997	-0.1066	-0.1063	-0.138	-0.2204	-0.2145	-0.2224
	6.55	-0.1902	-0.1853	-0.0996	-0.1063	-0.1061	-0.1379	-0.2197	-0.2168	-0.2219
	65583	-0.189	-0.1844	-0.0994	-0.1063	-0.106	-0.1379	-0.2186	-0.218	-0.2212
	65667	-0.1875	-0.1829	-0.0996	-0.1061	-0.106	-0.1377	-0.218	-0.2181	-0.2204
	6575	-0.1865	-0.182	-0.0996	-0.106	-0.1055	-0.1377	-0.2174	-0.218	-0.2195
	65833	-0.1852	-0.1807	-0.0996	-0.106	-0.1055	-0.1376	-0.2164	-0.2175	-0.2187
	65917	-0.1843	0.1072	-0.0994	-0.106	-0.1054	-0.1376	-0.2158	-0.2166	-0.2181
	6.6	0.088	0.1302	-0.0993	-0.106	-0.1052	-0.1351	-0.2151	-0.2157	-0.2175
	66083	0.1118	0.1258	0.0378	0.0455	0.0486	-0.1351	0.0607	-0.2149	-0.2169
	66167	0.1073	0.1228	0.073	0.0806	0.0817	-0.135	0.1061	-0.214	-0.2164
	6625	0.1049	0.1196	0.0819	0.0874	0.0881	-0.1351	0.1113	-0.2132	0.0632
	66333	0.1023	0.1162	0.0877	0.0918	0.0924	-0.135	0.1131	-0.2123	0.1081
	66417	0.1006	0.1133	0.0921	0.0953	0.0953	0.0759	0.118	-0.2116	0.1102
	6.65	0.0986	0.1107	0.095	0.0982	0.097	0.1093	0.1238	-0.2107	0.1106
	66583	0.097	0.1086	0.0971	0.1008	0.0986	0.1167	0.1341	-0.21	0.1102
	66667	0.0958	0.1072	0.0986	0.1032	0.0997	0.1215	0.1505	-0.2093	0.1109
	66667	0.0947	0.106	0.0997	0.1057	0.1006	0.1249	0.1684	0.0526	0.1121
	6675	0.0938	0.1046	0.1	0.1078	0.1015	0.1272	0.176	0.1028	0.1136
	66833	0.0932	0.104	0.1003	0.1096	0.1025	0.1289	0.1791	0.1077	0.118
	66917	0.0925	0.1032	0.1002	0.1106	0.1028	0.1305	0.1817	0.1104	0.1232
	6.7	0.0921	0.1026	0.1	0.1109	0.1032	0.1316	0.1839	0.1127	0.1279
	67083	0.0919	0.102	0.0999	0.111	0.1035	0.1328	0.1852	0.1167	0.1318
	67167	0.0913	0.1012	0.0996	0.1113	0.1035	0.1331	0.1864	0.1211	0.1348
	6725	0.0913	0.1008	0.0991	0.1115	0.1037	0.1334	0.1878	0.1267	0.1373
	67333	0.0909	0.1003	0.099	0.1112	0.1034	0.1337	0.1893	0.1325	0.1388
	67417	0.0907	0.1002	0.0986	0.1112	0.1035	0.1337	0.1907	0.1377	0.1402
	6.75	0.0906	0.0997	0.0982	0.1112	0.1035	0.1339	0.1928	0.1411	0.1414
	67583	0.0906	0.0994	0.0982	0.1115	0.1035	0.1333	0.1942	0.1432	0.1426
	67667	0.0903	0.0991	0.0977	0.1116	0.1035	0.1336	0.1958	0.1447	0.1437
	6775	0.09	0.0991	0.0976	0.1119	0.1035	0.1336	0.1975	0.1461	0.1446
	67833	0.09	0.0986	0.0974	0.1118	0.1035	0.1334	0.1983	0.1469	0.146
	67917	0.0898	0.0985	0.0971	0.1119	0.1037	0.1333	0.1997	0.1478	0.1475
	6.8	0.0896	0.099	0.097	0.1121	0.1038	0.1333	0.201	0.1485	0.1492
	68083	0.09	0.0985	0.0968	0.1124	0.1038	0.1334	0.2023	0.1493	0.1507
	68167	0.0898	0.0985	0.0967	0.1124	0.1043	0.1337	0.2041	0.1499	0.1524
	6825	0.09	0.0986	0.0965	0.1131	0.1044	0.1337	0.2061	0.1508	0.1543
	68333	0.0901	0.0988	0.0965	0.1136	0.1048	0.1341	0.2082	0.1519	0.1562
	68417	0.0903	0.099	0.0965	0.1138	0.1051	0.1341	0.2107	0.1533	0.158
	6.85	0.0903	0.0991	0.0964	0.1142	0.1052	0.1342	0.2134	0.1547	0.1592
	68583	0.091	0.0996	0.0965	0.1145	0.1057	0.1347	0.2164	0.1565	0.1611
	68667	0.0913	0.0997	0.0965	0.1147	0.1058	0.1345	0.2193	0.158	0.1629
	6875	0.0918	0.1002	0.0964	0.1151	0.1061	0.135	0.2224	0.1598	0.1646
	68833	0.0924	0.1006	0.0964	0.1153	0.1067	0.1351	0.2255	0.1617	0.1664
	68917	0.0929	0.1011	0.0965	0.1156	0.107	0.1353	0.2282	0.1633	0.1681
	6.9	0.0939	0.1022	0.0964	0.1156	0.1073	0.1354	0.2308	0.1646	0.1699
	69083	0.0948	0.1031	0.0964	0.1159	0.1075	0.1356	0.2335	0.1661	0.1719
	69167	0.0959	0.1043	0.0964	0.1157	0.1077	0.1359	0.2364	0.1673	0.1737
	6925	0.0973	0.1063	0.0962	0.1159	0.1078	0.136	0.2395	0.1684	0.1754
	69333	0.0988	0.1081	0.0962	0.116	0.108	0.1363	0.2425	0.1695	0.1771
	69417	0.1015	0.1109	0.0962	0.1157	0.1083	0.1368	0.245	0.1705	0.1789
	6.95	0.1044	0.1145	0.0964	0.116	0.1083	0.1368	0.2476	0.1713	0.1812
	69583	0.1084	0.1194	0.0964	0.116	0.1081	0.1369	0.2502	0.1725	0.1836
	69667	0.1142	0.1267	0.0964	0.116	0.1081	0.1371	0.2525	0.1731	0.1862
	6975	0.1215	0.1383	0.0962	0.116	0.1083	0.1374	0.2534	0.1742	0.1893
	69833	0.131	0.155	0.0962	0.1162	0.1081	0.1374	0.2538	0.1751	0.1919
	69917	0.1424	0.1765	0.0962	0.116	0.108	0.1376	0.2535	0.1762	0.1945
	7	0.1577	0.1922	0.0959	0.116	0.108	0.1376	0.2531	0.1772	0.1966
	70083	0.174	0.1971	0.0962	0.116	0.108	0.1377	0.2526	0.1783	0.1984
	70167	0.183	0.1974	0.0962	0.116	0.108	0.1377	0.2514	0.18	0.2003
	7025	0.1862	0.1963	0.0959	0.116	0.1078	0.1377	0.2508	0.1814	0.2016
	70333	0.1858	0.1949	0.0962	0.1159	0.1077	0.1377	0.2503	0.1833	0.2035
	70417	0.1853	0.1939	0.0961	0.1157	0.1075	0.1376	0.2499	0.1861	0.2044
	7.05	0.1846	0.1925	0.0961	0.1159	0.1075	0.138	0.2493	0.1891	0.2052
	70583	0.1836	0.1916	0.0961	0.116	0.1073	0.1379	0.2483	0.1928	0.2053
	70667	0.183	0.1902	0.0959	0.1157	0.1073	0.1379	0.2473	0.1972	0.2059
	7075	0.1824	0.1891	0.0959	0.1157	0.1073	0.1379	0.2467	0.201	0.2056
	70833	0.1814	0.1881	0.0961	0.1156	0.107	0.1377	0.2462	0.2045	0.2053
	70917	0.1807	-0.1093	0.0961	0.1156	0.107	0.1377	0.2456	0.2064	0.2049
	7.1	-0.0912	-0.1257	0.0962	0.1154	0.107	0.1379	0.2451	0.2068	0.2045
	71083	-0.1154	-0.1237	-0.0343	-0.0565	-0.0527	0.1377	-0.0883	0.2067	0.2038
	71167	-0.1096	-0.1228	-0.0692	-0.0884	-0.0855	0.1377	-0.1089	0.2061	0.203
	7125	-0.107	-0.1217	-0.0776	-0.0939	-0.0921	0.1376	-0.1095	0.2056	-0.0599
	71333	-0.1052	-0.12	-0.0829	-0.0976	-0.0964	0.1377	-0.1092	0.2052	-0.102
	71417	-0.1032	-0.1176	-0.0864	-0.1005	-0.0994	-0.0788	-0.1102	0.2039	-0.1057
	7.15	-0.1012	-0.1156	-0.089	-0.1026	-0.1012	-0.1148	-0.1128	0.2035	-0.1069
	71583	-0.0996	-0.1138	-0.0907	-0.1037	-0.1025	-0.1226	-0.1186	0.2026	-0.108
	71667	-0.098	-0.1115	-0.0918	-0.1046	-0.1032	-0.1272	-0.126	0.2018	-0.1092
	71667	-0.097	-0.1099	-0.0921	-0.1049	-0.1034	-0.1304	-0.1339	-0.0539	-0.1124
	7174	-0.0961	-0.1089	-0.0929	-0.1052	-0.1035	-0.1322	-0.1405	-0.104	-0.1171
	71823	-0.0954	-0.1077	-0.0932	-0.1052	-0.1034	-0.1333	-0.1443	-0.1109	-0.1246
	71906	-0.095	-0.1067	-0.0935	-0.1049	-0.1031	-0.1344	-0.1467	-0.1145	-0.1341
	7199	-0.0948	-0.1058	-0.0933	-0.1048	-0.1031	-0.1345	-0.1481	-0.118	-0.1443
	72073	-0.0942	-0.1049	-0.0935	-0.1044	-0.1026	-0.1348	-0.1498	-0.122	-0.149
	72156	-0.0941	-0.1043	-0.0933	-0.104	-0.1025	-0.1347	-0.1505	-0.1266	-0.1533
	7224	-0.0935	-0.1038	-0.0932	-0.1038	-0.102	-0.1344	-0.1518	-0.131	-0.1554
	72323	-0.0932	-0.1032	-0.093	-0.1032	-0.102	-0.1342	-0.1528	-0.1357	-0.1568
	72406	-0.093	-0.1028	-0.0929	-0.1032	-0.1014	-0.1337	-0.1533	-0.1388	-0.1577
	7249	-0.0927	-0.1023	-0.0922	-0.1028	-0.1012	-0.1336	-0.1542	-0.1418	-0.1591
	72573	-0.0925	-0.1019	-0.0921	-0.1023	-0.1008	-0.1334	-0.1551	-0.1432	-0.1606
	72656	-0.0925	-0.1012	-0.0922	-0.102	-0.1006	-0.1333	-0.1562	-0.1446	-0.162
	7274	-0.0925	-0.1008	-0.0919	-0.1019	-0.1003	-0.133	-0.1575	-0.1455	-0.1638
	72823	-0.0921	-0.1006	-0.0916	-0.1017	-0.1003	-0.1328	-0.1591	-0.1463	-0.1659
	72906	-0.0921	-0.1005	-0.0913	-0.1014	-0.1003	-0.1328	-0.1608	-0.1472	-0.1685
	7299	-0.0919	-0.1002	-0.0913	-0.1012	-0.1	-0.1325	-0.1623	-0.1484	-0.1711
	73073	-0.0922	-0.1002	-0.091	-0.1009	-0.0999	-0.1327	-0.164	-0.1493	-0.1733
	73156	-0.0921	-0.1	-0.0909	-0.1009	-0.0997	-0.1328	-0.1658	-0.1504	-0.1749
	7324	-0.0921	-0.0997	-0.0907	-0.1006	-0.0999	-0.1322	-0.1679	-0.1518	-0.1765
	73323	-0.0922	-0.0996	-0.0909	-0.1005	-0.0997	-0.1324	-0.1696	-0.1533	-0.1777
	73406	-0.0924	-0.0994	-0.0909	-0.1005	-0.0997	-0.1325	-0.1714	-0.1548	-0.1788
	7349	-0.0925	-0.0994	-0.0901	-0.1002	-0.0994	-0.1325	-0.1739	-0.1566	-0.1803
	73573	-0.0929	-0.0993	-0.0903	-0.1	-0.0996	-0.1324	-0.1765	-0.1585	-0.1812
	73656	-0.0932	-0.0994	-0.0904	-0.0999	-0.0994	-0.1327	-0.1786	-0.1604	-0.1818
	7374	-0.0939	-0.0994	-0.0903	-0.0997	-0.0993	-0.1325	-0.1812	-0.1621	-0.1827
	73823	-0.0944	-0.0996	-0.0901	-0.0996	-0.0991	-0.1325	-0.1833	-0.1638	-0.1835
	73906	-0.0951	-0.1002	-0.0901	-0.0994	-0.0991	-0.1324	-0.1856	-0.1653	-0.1844
	7399	-0.0961	-0.1005	-0.09	-0.0994	-0.0991	-0.1324	-0.1879	-0.1672	-0.185
	74073	-0.097	-0.1012	-0.09	-0.0993	-0.099	-0.1322	-0.1888	-0.1687	-0.1859
	74156	-0.0991	-0.1025	-0.0901	-0.0993	-0.099	-0.1325	-0.1908	-0.1704	-0.187
	7424	-0.1009	-0.1037	-0.0901	-0.099	-0.099	-0.1324	-0.1931	-0.1716	-0.1882
	74323	-0.1035	-0.1052	-0.0903	-0.0991	-0.0988	-0.1324	-0.1962	-0.1731	-0.1897
	74406	-0.1069	-0.1073	-0.09	-0.0988	-0.0986	-0.1325	-0.1989	-0.1742	-0.1922
	7449	-0.1118	-0.1093	-0.09	-0.099	-0.0988	-0.1325	-0.2026	-0.1751	-0.1948
	74573	-0.1183	-0.1125	-0.09	-0.0988	-0.0986	-0.1325	-0.2125	-0.1763	-0.1978
	74656	-0.1264	-0.1168	-0.0898	-0.0986	-0.0986	-0.1324	-0.216	-0.1778	-0.201
	7474	-0.138	-0.1221	-0.0898	-0.0985	-0.0986	-0.1325	-0.219	-0.1791	-0.2036
	74823	-0.1524	-0.1307	-0.0898	-0.0985	-0.0983	-0.1327	-0.2212	-0.1809	-0.2064
	74906	-0.167	-0.1438	-0.0898	-0.0983	-0.0982	-0.1325	-0.2229	-0.1824	-0.209
	7499	-0.1775	-0.1618	-0.0898	-0.0982	-0.0982	-0.1325	-0.2239	-0.1846	-0.2111
	75073	-0.182	-0.1778	-0.0898	-0.098	-0.098	-0.1324	-0.2238	-0.1865	-0.2129
	75156	-0.1833	-0.1858	-0.0896	-0.0983	-0.0979	-0.1325	-0.2238	-0.1893	-0.2143
	7524	-0.1832	-0.1873	-0.0898	-0.098	-0.0982	-0.1325	-0.2239	-0.1923	-0.2151
	75323	-0.183	-0.1862	-0.0896	-0.098	-0.0979	-0.1325	-0.2232	-0.1958	-0.2157
	75406	-0.1821	-0.185	-0.0898	-0.0982	-0.0979	-0.1325	-0.2226	-0.1998	-0.2158
	7549	-0.181	-0.1838	-0.0896	-0.098	-0.0979	-0.1328	-0.2219	-0.2039	-0.2155
	75573	-0.1803	-0.1823	-0.0895	-0.0979	-0.0979	-0.1325	-0.221	-0.2079	-0.2152
	75656	-0.1794	-0.1812	-0.0896	-0.0976	-0.0971	-0.1325	-0.2206	-0.2105	-0.2145
	7574	-0.1785	-0.1803	-0.0896	-0.0977	-0.0971	-0.1327	-0.2201	-0.2117	-0.2137
	75823	-0.1775	-0.1792	-0.0898	-0.0976	-0.097	-0.1325	-0.2192	-0.2123	-0.2123
	75906	-0.1771	0.104	-0.0896	-0.0976	-0.0971	-0.1327	-0.2184	-0.2122	-0.212
	7599	0.0846	0.1315	-0.0898	-0.0974	-0.0968	-0.1325	-0.2181	-0.2116	-0.2117
	76073	0.1127	0.1269	0.0275	0.0372	0.0388	-0.1324	0.068	-0.2108	-0.2113
	76156	0.1087	0.1231	0.0636	0.0729	0.0742	-0.1325	0.1116	-0.2102	-0.2105
	7624	0.1061	0.1196	0.0729	0.0799	0.0808	-0.1325	0.1145	-0.2094	0.0639
	76323	0.1032	0.1156	0.0788	0.0852	0.0851	-0.1324	0.1145	-0.209	0.1069
	76406	0.1009	0.1121	0.0828	0.0895	0.088	0.0724	0.1162	-0.2078	0.1104
	7649	0.0985	0.1095	0.0857	0.0927	0.0903	0.1086	0.12	-0.2073	0.1106
	76573	0.0965	0.1073	0.0874	0.0951	0.0919	0.116	0.1307	-0.2064	0.111
	76656	0.0954	0.1058	0.0884	0.0974	0.0933	0.1206	0.1479	-0.2056	0.1116
	76667	0.0942	0.1046	0.0893	0.0994	0.0942	0.1237	0.1652	-0.2055	0.1128
	76667	0.0933	0.1037	0.0896	0.1009	0.0948	0.1258	0.174	0.0541	0.1153
	7675	0.0925	0.1028	0.09	0.1028	0.0954	0.1279	0.1786	0.1034	0.1189
	76833	0.0921	0.1022	0.0903	0.1034	0.0959	0.1295	0.1812	0.1086	0.1232
	76917	0.0916	0.1014	0.0904	0.104	0.0962	0.1308	0.1827	0.1112	0.1276
	7.7	0.0915	0.1012	0.0903	0.1043	0.0968	0.1316	0.1844	0.1135	0.1308
	77083	0.0909	0.1008	0.0901	0.1046	0.0968	0.1321	0.1858	0.1162	0.1342
	77167	0.0906	0.1	0.0903	0.1046	0.097	0.1325	0.1873	0.1199	0.1363
	7725	0.0906	0.0999	0.0903	0.1049	0.097	0.1328	0.1884	0.1244	0.1382
	77333	0.0901	0.0994	0.09	0.1049	0.097	0.1331	0.1902	0.1293	0.1392
	77417	0.09	0.0991	0.09	0.1051	0.0971	0.1333	0.1914	0.1342	0.1403
	7.75	0.0898	0.0988	0.0898	0.1051	0.0971	0.1334	0.1934	0.1374	0.1412
	77583	0.0896	0.0985	0.0896	0.1054	0.0973	0.1334	0.1951	0.1397	0.1418
	77667	0.0896	0.098	0.0896	0.1052	0.0971	0.1336	0.1965	0.1406	0.1431
	7775	0.0896	0.098	0.0893	0.1054	0.097	0.1337	0.1978	0.1398	0.144
	77833	0.0893	0.0979	0.0893	0.1057	0.0971	0.1339	0.1989	0.1424	0.145
	77917	0.0893	0.0977	0.0893	0.1058	0.0971	0.1341	0.1998	0.1437	0.1464
	7.8	0.0895	0.0976	0.0892	0.1058	0.0971	0.1337	0.201	0.1446	0.1475
	78083	0.0895	0.0977	0.0892	0.1061	0.097	0.1337	0.2026	0.1452	0.1492
	78167	0.0895	0.0977	0.089	0.1063	0.0973	0.1342	0.2039	0.1458	0.1505
	7825	0.0895	0.0977	0.089	0.1063	0.0971	0.1341	0.2056	0.1466	0.1522
	78333	0.0896	0.098	0.089	0.1066	0.0971	0.1344	0.2071	0.1476	0.1534
	78417	0.0898	0.0982	0.0889	0.1061	0.0973	0.1345	0.2091	0.1485	0.1551
	7.85	0.0901	0.0982	0.0889	0.1067	0.0973	0.1344	0.2114	0.1498	0.1566
	78583	0.0909	0.0985	0.0887	0.1069	0.0973	0.1347	0.2136	0.1522	0.1582
	78667	0.091	0.099	0.0886	0.1069	0.0973	0.1347	0.2155	0.1539	0.1594
	7875	0.0915	0.0996	0.0884	0.1066	0.0974	0.135	0.2175	0.1554	0.1606
	78833	0.0919	0.1002	0.0884	0.1066	0.0973	0.1353	0.2197	0.1571	0.1617
	78917	0.0925	0.1009	0.0884	0.1067	0.0974	0.1351	0.2216	0.1585	0.1632
	7.9	0.0936	0.1017	0.0884	0.1069	0.0976	0.1353	0.2241	0.1598	0.1644
	79083	0.0947	0.1032	0.0883	0.1069	0.0974	0.1353	0.2261	0.1611	0.1656
	79167	0.0962	0.1048	0.0881	0.1066	0.0976	0.1353	0.2284	0.1621	0.1667
	7925	0.0982	0.107	0.0883	0.1064	0.0974	0.1356	0.2309	0.1633	0.1678
	79333	0.0999	0.1098	0.0881	0.1069	0.0974	0.1354	0.2335	0.1641	0.1693
	79417	0.1032	0.1139	0.0881	0.1069	0.0976	0.1354	0.2363	0.1652	0.1708
	7.95	0.1067	0.1189	0.0878	0.1064	0.0976	0.1354	0.2396	0.1661	0.1727
	79583	0.1116	0.1264	0.0881	0.1066	0.0976	0.1357	0.243	0.167	0.1743
	79667	0.1183	0.1368	0.088	0.1067	0.0974	0.1357	0.2461	0.1675	0.1769
	7975	0.1266	0.1511	0.088	0.1064	0.0974	0.1354	0.2488	0.1681	0.1797
	79833	0.1373	0.1687	0.088	0.106	0.0976	0.1356	0.25	0.169	0.1824
	79917	0.1511	0.1844	0.088	0.1066	0.0974	0.1356	0.2502	0.1699	0.185
	8	0.1678	0.1911	0.0877	0.1066	0.0974	0.1357	0.2499	0.1708	0.1876
	80083	0.1801	0.1908	0.0878	0.1063	0.0974	0.1359	0.2496	0.1717	0.1899
	80167	0.1835	0.1904	0.0878	0.1063	0.0974	0.1356	0.2488	0.173	0.1917
	8025	0.1839	0.1891	0.0877	0.1066	0.0974	0.1356	0.2482	0.1743	0.1936
	80333	0.1835	0.1888	0.0878	0.1063	0.0976	0.1356	0.2474	0.176	0.1952
	80417	0.1826	0.1876	0.0877	0.1063	0.0974	0.1356	0.2465	0.1783	0.1974
	8.05	0.1814	0.1867	0.0877	0.1063	0.0974	0.1356	0.2457	0.1812	0.1986
	80583	0.1804	0.1855	0.0877	0.1063	0.0974	0.1357	0.2454	0.1846	0.2001
	80667	0.1794	0.1847	0.0877	0.1061	0.0973	0.1359	0.2444	0.1887	0.2007
	8075	0.1785	0.1838	0.0877	0.1061	0.0974	0.1359	0.2436	0.1931	0.201
	80833	0.1775	-0.1054	0.0878	0.1058	0.0973	0.1359	0.2432	0.1977	0.2007
	80917	-0.089	-0.126	0.0877	0.106	0.0973	0.1357	0.2425	0.2016	0.2003
	8.1	-0.115	-0.1237	-0.0256	-0.0466	-0.0413	0.1354	-0.0898	0.2038	0.2001
	81083	-0.1102	-0.1226	-0.0619	-0.0799	-0.0758	0.1357	-0.1131	0.2052	0.1992
	81167	-0.107	-0.1212	-0.0704	-0.0858	-0.0829	0.1357	-0.1113	0.205	-0.0607
	8125	-0.1046	-0.1191	-0.0755	-0.0904	-0.0875	0.1357	-0.1093	0.2044	-0.1014
	81333	-0.1022	-0.1173	-0.0796	-0.0939	-0.0904	-0.0759	-0.1112	0.203	-0.1049
	81417	-0.0997	-0.1144	-0.0819	-0.0961	-0.0925	-0.1131	-0.1142	0.2024	-0.1067
	8.15	-0.098	-0.1121	-0.0832	-0.0976	-0.0936	-0.1206	-0.1179	0.202	-0.1083
	81583	-0.0964	-0.1101	-0.0845	-0.0982	-0.0945	-0.1254	-0.1246	0.2012	-0.1104
	81667	-0.0953	-0.1089	-0.0851	-0.0991	-0.0954	-0.1284	-0.1336	0.2006	-0.1141
	81667	-0.0945	-0.1072	-0.0857	-0.0996	-0.0958	-0.1304	-0.1409	-0.0568	-0.1194
	81743	-0.0939	-0.1064	-0.086	-0.0997	-0.0959	-0.1321	-0.1463	-0.107	-0.1264
	81827	-0.0932	-0.1054	-0.0864	-0.0999	-0.0959	-0.133	-0.1484	-0.1135	-0.1341
	8191	-0.0929	-0.1048	-0.0863	-0.0999	-0.0959	-0.1336	-0.1499	-0.1173	-0.1408
	81993	-0.0924	-0.104	-0.0863	-0.0996	-0.0958	-0.1341	-0.1514	-0.1208	-0.1464
	82077	-0.0922	-0.1032	-0.0863	-0.0994	-0.0956	-0.1345	-0.1528	-0.1238	-0.1499
	8216	-0.0919	-0.1028	-0.0861	-0.0993	-0.0956	-0.1229	-0.1534	-0.1276	-0.1518
	82243	-0.0916	-0.102	-0.086	-0.0991	-0.0954	-0.1229	-0.1548	-0.1318	-0.1528
	82327	-0.0918	-0.1015	-0.086	-0.0988	-0.0953	-0.1228	-0.1557	-0.1362	-0.1539
	8241	-0.0913	-0.1011	-0.0858	-0.0986	-0.0951	-0.1228	-0.1571	-0.1389	-0.155
	82493	-0.0912	-0.1006	-0.0858	-0.0985	-0.0948	-0.1226	-0.1582	-0.1409	-0.1562
	82577	-0.091	-0.1005	-0.0857	-0.098	-0.0945	-0.1225	-0.1595	-0.1421	-0.1572
	8266	-0.0912	-0.1003	-0.0858	-0.0977	-0.0945	-0.1223	-0.1609	-0.1431	-0.1588
	82743	-0.091	-0.0997	-0.0854	-0.0976	-0.0944	-0.1221	-0.1621	-0.144	-0.1609
	82827	-0.091	-0.0996	-0.0855	-0.097	-0.0941	-0.1221	-0.164	-0.1449	-0.1629
	8291	-0.0907	-0.0994	-0.0855	-0.0961	-0.0939	-0.122	-0.1655	-0.1456	-0.1649
	82993	-0.091	-0.0991	-0.0854	-0.0956	-0.0939	-0.1218	-0.1672	-0.1464	-0.1672
	83077	-0.091	-0.0991	-0.0855	-0.0954	-0.0939	-0.1218	-0.1688	-0.147	-0.1685
	8316	-0.0913	-0.0986	-0.0852	-0.095	-0.0936	-0.1217	-0.1704	-0.1478	-0.1701
	83243	-0.0913	-0.0986	-0.0852	-0.095	-0.0936	-0.1217	-0.1719	-0.149	-0.171
	83327	-0.0913	-0.0986	-0.0851	-0.0945	-0.0936	-0.1217	-0.174	-0.1501	-0.1719
	8341	-0.0916	-0.0988	-0.0851	-0.0945	-0.0933	-0.1215	-0.1752	-0.1514	-0.1727
	83493	-0.0921	-0.0986	-0.0849	-0.0945	-0.0933	-0.1214	-0.1771	-0.1528	-0.1739
	83577	-0.0925	-0.099	-0.0851	-0.0941	-0.0932	-0.1215	-0.1789	-0.1543	-0.1745
	8366	-0.0929	-0.0994	-0.0851	-0.0941	-0.0932	-0.1211	-0.1804	-0.156	-0.1751
	83743	-0.0935	-0.1	-0.0849	-0.0939	-0.0932	-0.1214	-0.1823	-0.1571	-0.1759
	83827	-0.0944	-0.1005	-0.0848	-0.0939	-0.0932	-0.1214	-0.1833	-0.1585	-0.1766
	8391	-0.0954	-0.1011	-0.0849	-0.0939	-0.093	-0.1211	-0.1852	-0.16	-0.1774
	83993	-0.0965	-0.102	-0.0848	-0.0938	-0.093	-0.1211	-0.1865	-0.1612	-0.1781
	84077	-0.0985	-0.1032	-0.0848	-0.0938	-0.0929	-0.1212	-0.1884	-0.1623	-0.1788
	8416	-0.1002	-0.1044	-0.0849	-0.0935	-0.0927	-0.1209	-0.1901	-0.1633	-0.18
	84243	-0.1028	-0.1057	-0.0846	-0.0933	-0.0929	-0.1209	-0.1922	-0.1644	-0.1815
	84327	-0.1057	-0.1073	-0.0846	-0.0935	-0.0925	-0.1211	-0.1945	-0.1652	-0.1829
	8441	-0.1098	-0.1099	-0.0846	-0.0932	-0.0925	-0.1209	-0.1978	-0.1662	-0.185
	84493	-0.115	-0.1128	-0.0846	-0.0932	-0.0927	-0.1209	-0.2015	-0.1673	-0.1873
	84577	-0.1228	-0.117	-0.0843	-0.0929	-0.0925	-0.1211	-0.2058	-0.1679	-0.1902
	8466	-0.1321	-0.1231	-0.0845	-0.0932	-0.0925	-0.1208	-0.2096	-0.1688	-0.194
	84743	-0.1432	-0.1322	-0.0842	-0.0929	-0.0925	-0.1209	-0.2132	-0.1699	-0.1977
	84827	-0.1562	-0.1441	-0.0843	-0.0927	-0.0924	-0.1208	-0.2157	-0.1714	-0.2006
	8491	-0.1701	-0.1591	-0.0845	-0.0924	-0.0925	-0.1209	-0.2168	-0.1725	-0.2032
	84993	-0.1792	-0.1722	-0.0843	-0.0927	-0.0921	-0.1208	-0.2168	-0.1743	-0.2059
	85077	-0.1823	-0.1804	-0.0842	-0.0924	-0.0924	-0.1208	-0.2168	-0.1762	-0.2081
	8516	-0.182	-0.1836	-0.0842	-0.0924	-0.0924	-0.1208	-0.2158	-0.1783	-0.2099
	85243	-0.1815	-0.1817	-0.0843	-0.0924	-0.0922	-0.1208	-0.2152	-0.181	-0.2114
	85327	-0.1803	-0.1806	-0.0843	-0.0922	-0.0919	-0.1206	-0.2146	-0.1843	-0.2119
	8541	-0.1794	-0.1798	-0.0842	-0.0922	-0.0921	-0.1208	-0.214	-0.1881	-0.2119
	85493	-0.1781	-0.1785	-0.084	-0.0922	-0.0919	-0.1209	-0.2132	-0.1926	-0.2116
	85577	-0.1772	-0.1777	-0.0842	-0.0921	-0.0919	-0.1208	-0.2126	-0.1972	-0.2113
	8566	-0.1765	-0.1768	-0.0843	-0.0922	-0.0921	-0.1208	-0.2119	-0.2016	-0.2107
	85743	-0.1752	-0.1756	-0.084	-0.0919	-0.0919	-0.1205	-0.2113	-0.2053	-0.21
	85827	-0.1743	0.1008	-0.084	-0.0921	-0.0903	-0.1206	-0.2105	-0.2073	-0.2093
	8591	0.0808	0.1296	-0.084	-0.0918	-0.0903	-0.1208	-0.2097	-0.2079	-0.2087
	85993	0.1116	0.1272	0.0224	0.0318	0.0327	-0.1205	0.0663	-0.2078	-0.2082
	86077	0.1089	0.1237	0.0593	0.0683	0.0681	-0.1203	0.1078	-0.2073	-0.2074
	8616	0.1063	0.1197	0.0683	0.0762	0.0748	-0.1205	0.1106	-0.2068	0.0636
	86243	0.1035	0.1151	0.0739	0.0813	0.0793	-0.1205	0.1113	-0.2062	0.107
	86327	0.1011	0.1115	0.0779	0.0852	0.0822	0.0603	0.1124	-0.2053	0.1099
	8641	0.0988	0.1089	0.08	0.0886	0.0845	0.0974	0.1144	-0.2049	0.1113
	86493	0.0964	0.1066	0.0822	0.091	0.086	0.1049	0.1177	-0.2041	0.1119
	86577	0.0947	0.1048	0.0831	0.0953	0.0871	0.1098	0.1249	-0.2033	0.113
	8666	0.0938	0.1035	0.0835	0.097	0.0881	0.113	0.1389	-0.2027	0.1139
	86667	0.0929	0.1025	0.0842	0.098	0.0887	0.1151	0.1536	-0.2027	0.1162
	86667	0.0921	0.1012	0.0845	0.0991	0.0893	0.117	0.1669	0.0562	0.1189
	8675	0.0913	0.1006	0.0848	0.0997	0.0895	0.1179	0.1722	0.1035	0.1223
	86833	0.091	0.1002	0.0851	0.1	0.0901	0.1189	0.1746	0.1098	0.1258
	86917	0.0906	0.0996	0.0849	0.1003	0.0901	0.1197	0.1757	0.1127	0.1287
	8.7	0.0903	0.0991	0.0848	0.1006	0.0903	0.12	0.1769	0.1148	0.1316
	87083	0.09	0.0988	0.0848	0.1006	0.0904	0.1202	0.1783	0.1174	0.1336
	87167	0.0896	0.0988	0.0846	0.1008	0.0904	0.1205	0.1792	0.1199	0.1353
	8725	0.0896	0.0979	0.0845	0.1011	0.0906	0.1206	0.1801	0.1237	0.136
	87333	0.0892	0.0979	0.0845	0.1011	0.0904	0.1208	0.1814	0.1276	0.1368
	87417	0.089	0.0974	0.0846	0.1011	0.0906	0.1208	0.1823	0.1315	0.1377
	8.75	0.089	0.0974	0.0845	0.1011	0.0904	0.1209	0.1843	0.1345	0.1383
	87583	0.089	0.097	0.0848	0.1014	0.0904	0.1209	0.1856	0.1371	0.1391
	87667	0.0889	0.0967	0.0845	0.1011	0.0906	0.1208	0.187	0.1386	0.1397
	8775	0.0887	0.0968	0.0845	0.1011	0.0904	0.1209	0.1888	0.1398	0.1405
	87833	0.089	0.0965	0.0843	0.1011	0.0904	0.1208	0.1899	0.1408	0.1415
	87917	0.089	0.0967	0.0843	0.1011	0.0906	0.1208	0.1919	0.1417	0.1426
	8.8	0.0889	0.0965	0.0842	0.1011	0.0901	0.1208	0.1936	0.142	0.1438
	88083	0.0892	0.0967	0.0843	0.1008	0.0903	0.1206	0.1948	0.1424	0.145
	88167	0.0893	0.0967	0.084	0.1009	0.0903	0.1205	0.1965	0.1432	0.1463
	8825	0.0896	0.0971	0.0842	0.1009	0.0904	0.1206	0.198	0.1438	0.1475
	88333	0.0898	0.0973	0.0843	0.1008	0.0903	0.1206	0.1997	0.1447	0.149
	88417	0.0903	0.0974	0.084	0.1008	0.0904	0.1206	0.2015	0.1455	0.1501
	8.85	0.0907	0.0979	0.084	0.1006	0.0904	0.1209	0.203	0.1466	0.1513
	88583	0.0913	0.0982	0.0843	0.1008	0.0904	0.1208	0.2045	0.1478	0.1524
	88667	0.0919	0.0988	0.084	0.1005	0.0903	0.1206	0.2065	0.149	0.1534
	8875	0.0925	0.0997	0.084	0.1006	0.0903	0.1212	0.2082	0.1502	0.1543
	88833	0.0935	0.1006	0.0838	0.1005	0.0903	0.1214	0.2097	0.1514	0.1556
	88917	0.0947	0.102	0.084	0.1005	0.0903	0.1211	0.2113	0.1525	0.1562
	8.9	0.0956	0.1034	0.084	0.1006	0.0903	0.1211	0.2131	0.1534	0.1569
	89083	0.0974	0.1055	0.0838	0.1005	0.0904	0.1209	0.2151	0.1547	0.158
	89167	0.0991	0.1073	0.0838	0.1006	0.0903	0.1211	0.2171	0.1556	0.1589
	8925	0.1015	0.1101	0.0842	0.1003	0.0903	0.1208	0.2187	0.1562	0.16
	89333	0.1046	0.1139	0.0838	0.1003	0.0903	0.1208	0.221	0.1571	0.1612
	89417	0.1083	0.1191	0.084	0.1003	0.0903	0.1209	0.2238	0.1579	0.1627
	8.95	0.1125	0.1266	0.0837	0.1002	0.0903	0.1208	0.2273	0.1588	0.1643
	89583	0.118	0.1363	0.0838	0.1002	0.0903	0.1208	0.2309	0.1594	0.1662
	89667	0.1254	0.1511	0.0835	0.1002	0.0903	0.1208	0.2349	0.16	0.1681
	8975	0.1348	0.1682	0.0835	0.1002	0.0903	0.1205	0.2384	0.1608	0.1705
	89833	0.1476	0.1827	0.0834	0.0999	0.0903	0.1203	0.2412	0.1617	0.1731
	89917	0.1641	0.1882	0.0835	0.1	0.0901	0.1202	0.243	0.1623	0.1754
	9	0.1789	0.1881	0.0835	0.1	0.0901	0.12	0.2438	0.1632	0.1781
	90083	0.1818	0.1875	0.0834	0.0999	0.0901	0.1199	0.2436	0.1641	0.181
	90167	0.1815	0.1865	0.0834	0.0999	0.0901	0.1197	0.243	0.1649	0.1839
	9025	0.1804	0.1847	0.0834	0.0999	0.0901	0.1196	0.2424	0.1662	0.1867
	90333	0.1791	0.1838	0.0832	0.0999	0.09	0.1191	0.2416	0.1676	0.189
	90417	0.1785	0.1829	0.0832	0.0999	0.0903	0.1194	0.241	0.169	0.1911
	9.05	0.1772	0.1823	0.0832	0.0999	0.09	0.1194	0.2406	0.1714	0.1931
	90583	0.1766	0.1812	0.0834	0.0997	0.09	0.1194	0.2398	0.1742	0.1945
	90667	0.1754	0.1803	0.0832	0.0999	0.09	0.1194	0.2392	0.1777	0.1952
	9075	0.1745	-0.1019	0.0831	0.0997	0.0901	0.1191	0.2387	0.1815	0.1952
	90833	-0.0866	-0.1267	0.0832	0.0999	0.09	0.1191	0.2378	0.1865	0.1954
	90917	-0.1154	-0.1247	-0.0214	-0.0402	-0.033	0.1191	-0.0889	0.1913	0.1951
	9.1	-0.1106	-0.1226	-0.0578	-0.0736	-0.0686	0.1189	-0.1131	0.1954	0.1948
	91083	-0.1072	-0.1208	-0.0663	-0.0805	-0.0753	0.1188	-0.1118	0.1981	-0.0603
	91167	-0.1044	-0.118	-0.0716	-0.0851	-0.0799	0.1188	-0.1115	0.1994	-0.1008
	9125	-0.1015	-0.1157	-0.075	-0.0884	-0.0829	-0.059	-0.1124	0.1995	-0.104
	91333	-0.0986	-0.1127	-0.0776	-0.0907	-0.0852	-0.0968	-0.1148	0.1989	-0.1066
	91417	-0.0968	-0.111	-0.0794	-0.0919	-0.0864	-0.1043	-0.1205	0.1986	-0.109
	9.15	-0.0953	-0.1092	-0.0802	-0.0933	-0.0877	-0.109	-0.1279	0.1978	-0.1118
	91583	-0.0941	-0.1073	-0.0809	-0.0941	-0.0883	-0.1119	-0.1351	0.1974	-0.1151
	91667	-0.0933	-0.1063	-0.0814	-0.0944	-0.0886	-0.1141	-0.142	0.1968	-0.12
	91667	-0.0927	-0.1051	-0.0819	-0.095	-0.0887	-0.1154	-0.1458	-0.0579	-0.127
	9175	-0.0922	-0.1044	-0.082	-0.095	-0.0892	-0.1165	-0.1473	-0.1067	-0.1336
	91833	-0.0918	-0.1037	-0.082	-0.0953	-0.0892	-0.117	-0.1505	-0.1116	-0.1391
	91917	-0.0915	-0.1032	-0.082	-0.0947	-0.0893	-0.1173	-0.1518	-0.115	-0.1426
	9.2	-0.0912	-0.1025	-0.0822	-0.0947	-0.0892	-0.1176	-0.1534	-0.118	-0.1446
	92083	-0.091	-0.1017	-0.0822	-0.0945	-0.0892	-0.1177	-0.155	-0.1214	-0.1469
	92167	-0.0907	-0.1012	-0.0823	-0.0942	-0.089	-0.1179	-0.1559	-0.1244	-0.1482
	9225	-0.0903	-0.1009	-0.0823	-0.0942	-0.089	-0.118	-0.1562	-0.1279	-0.1495
	92333	-0.0903	-0.1008	-0.0823	-0.0941	-0.089	-0.1179	-0.1574	-0.1313	-0.1501
	92417	-0.0901	-0.1002	-0.082	-0.0938	-0.0889	-0.1177	-0.1582	-0.1347	-0.1505
	9.25	-0.0901	-0.0999	-0.0822	-0.0938	-0.0889	-0.1173	-0.1594	-0.1373	-0.1516
	92583	-0.0903	-0.1	-0.0819	-0.0936	-0.0887	-0.1173	-0.1608	-0.1386	-0.1528
	92667	-0.0901	-0.0996	-0.082	-0.0933	-0.0886	-0.1174	-0.1623	-0.1395	-0.154
	9275	-0.0901	-0.0993	-0.0819	-0.0932	-0.0887	-0.1171	-0.1638	-0.1408	-0.1554
	92833	-0.0903	-0.0993	-0.082	-0.093	-0.0886	-0.117	-0.1652	-0.1415	-0.1571
	92917	-0.0901	-0.099	-0.082	-0.0927	-0.0883	-0.1167	-0.1666	-0.1421	-0.1592
	9.3	-0.0903	-0.099	-0.082	-0.0927	-0.0886	-0.1165	-0.1682	-0.1427	-0.1606
	93083	-0.0906	-0.0988	-0.082	-0.0924	-0.0884	-0.1164	-0.169	-0.1432	-0.1618
	93167	-0.0907	-0.099	-0.0817	-0.0924	-0.0883	-0.1159	-0.1707	-0.1438	-0.1633
	9325	-0.0909	-0.099	-0.0819	-0.0922	-0.0883	-0.1159	-0.1719	-0.1449	-0.1641
	93333	-0.0913	-0.0994	-0.0819	-0.0921	-0.0881	-0.1157	-0.1731	-0.1458	-0.1652
	93417	-0.0918	-0.1	-0.082	-0.0919	-0.0881	-0.1157	-0.1748	-0.1469	-0.1661
	9.35	-0.0922	-0.1002	-0.082	-0.0918	-0.0881	-0.1159	-0.1759	-0.1479	-0.1672
	93583	-0.093	-0.1006	-0.0822	-0.0918	-0.0883	-0.1154	-0.1774	-0.1492	-0.1681
	93667	-0.0938	-0.1011	-0.0819	-0.0916	-0.0881	-0.1153	-0.1783	-0.1505	-0.1685
	9375	-0.0948	-0.1017	-0.0819	-0.0916	-0.0881	-0.1151	-0.1798	-0.1516	-0.1693
	93833	-0.0959	-0.1023	-0.0817	-0.0916	-0.0878	-0.1147	-0.1807	-0.1528	-0.1702
	93917	-0.0971	-0.1032	-0.0819	-0.0913	-0.088	-0.115	-0.1821	-0.1537	-0.1708
	9.4	-0.0988	-0.104	-0.0817	-0.0913	-0.0878	-0.1147	-0.1835	-0.155	-0.1717
	94083	-0.1006	-0.1051	-0.0814	-0.0912	-0.0878	-0.1145	-0.185	-0.1557	-0.173
	94167	-0.1031	-0.1064	-0.0817	-0.091	-0.0878	-0.1144	-0.187	-0.1566	-0.1739
	9425	-0.1066	-0.1083	-0.0814	-0.091	-0.0875	-0.1145	-0.1887	-0.1577	-0.1751
	94333	-0.1106	-0.1107	-0.0816	-0.091	-0.0875	-0.1142	-0.191	-0.1583	-0.1766
	94417	-0.1156	-0.1136	-0.0814	-0.091	-0.0874	-0.1142	-0.1937	-0.1594	-0.1785
	9.45	-0.1208	-0.1179	-0.0816	-0.0909	-0.0874	-0.1142	-0.1974	-0.16	-0.1809
	94583	-0.1281	-0.1235	-0.0816	-0.0906	-0.0874	-0.1144	-0.2013	-0.1611	-0.1839
	94667	-0.1369	-0.1315	-0.0814	-0.0904	-0.0872	-0.1141	-0.2058	-0.1618	-0.1872
	9475	-0.1476	-0.1435	-0.0816	-0.0907	-0.0869	-0.1141	-0.2097	-0.163	-0.191
	94833	-0.1603	-0.1588	-0.0814	-0.0904	-0.0871	-0.1139	-0.2131	-0.164	-0.1945
	94917	-0.1711	-0.172	-0.0816	-0.0904	-0.0871	-0.1139	-0.2149	-0.165	-0.198
	9.5	-0.1771	-0.1794	-0.0816	-0.0903	-0.0872	-0.1138	-0.2157	-0.1666	-0.201
	95083	-0.1777	-0.181	-0.0813	-0.0904	-0.0871	-0.1138	-0.2157	-0.1681	-0.2035
	95167	-0.1772	-0.1803	-0.0816	-0.0903	-0.0869	-0.1138	-0.2151	-0.1701	-0.2058
	9525	-0.1763	-0.1794	-0.0813	-0.0901	-0.0869	-0.1135	-0.2148	-0.1722	-0.207
	95333	-0.1752	-0.1783	-0.0813	-0.0901	-0.0867	-0.1107	-0.2142	-0.1752	-0.2078
	95417	-0.1746	-0.1771	-0.0813	-0.0901	-0.0867	-0.1107	-0.2137	-0.1786	-0.2081
	9.55	-0.1742	-0.1762	-0.0811	-0.0898	-0.0867	-0.1109	-0.2131	-0.1824	-0.2076
	95583	-0.1733	-0.1752	-0.0809	-0.0898	-0.0867	-0.1107	-0.2125	-0.1873	-0.2073
	95667	-0.1722	-0.1743	-0.0811	-0.09	-0.0867	-0.1107	-0.2117	-0.1923	-0.207
	9575	-0.1713	0.1009	-0.0811	-0.0898	-0.0864	-0.1107	-0.2113	-0.1969	-0.2064
	95833	0.0788	0.1305	-0.0811	-0.0898	-0.0864	-0.1106	-0.211	-0.2006	-0.2059
	95917	0.1121	0.1286	0.0196	0.0304	0.0294	-0.1087	0.0701	-0.2024	-0.2053
	9.6	0.1089	0.1249	0.057	0.0671	0.0648	-0.1089	0.1104	-0.2032	-0.2049
	96083	0.106	0.1206	0.0658	0.075	0.0716	-0.1086	0.1133	-0.2032	0.0663
	96167	0.1031	0.1162	0.0718	0.0809	0.0761	-0.1087	0.1148	-0.2026	0.1055
	9625	0.1005	0.1122	0.0753	0.0849	0.0793	0.0494	0.1164	-0.2021	0.1092
	96333	0.098	0.1092	0.0777	0.0878	0.0814	0.0863	0.1203	-0.2015	0.1109
	96417	0.0959	0.1067	0.0793	0.0904	0.0828	0.0939	0.1269	-0.2009	0.1125
	9.65	0.0944	0.1052	0.0806	0.0922	0.0838	0.0985	0.1417	-0.2003	0.1144
	96583	0.093	0.1037	0.0813	0.0936	0.0851	0.1015	0.1556	-0.1997	0.1157
	96667	0.0919	0.1026	0.0819	0.0953	0.0852	0.1038	0.1678	-0.1992	0.1182
	96667	0.0913	0.102	0.082	0.0961	0.086	0.1055	0.1745	0.0579	0.1215
	9675	0.0909	0.1011	0.0823	0.0965	0.0863	0.1067	0.1785	0.1028	0.1246
	96833	0.0901	0.1003	0.0825	0.097	0.0866	0.1073	0.1809	0.1075	0.1281
	96917	0.0896	0.1	0.0825	0.0974	0.0867	0.1083	0.1821	0.111	0.1304
	9.7	0.0893	0.0994	0.0825	0.0973	0.0869	0.1084	0.1833	0.1136	0.1322
	97083	0.0892	0.099	0.0825	0.0973	0.0871	0.109	0.1844	0.1162	0.1334
	97167	0.089	0.0988	0.0825	0.0976	0.0871	0.1093	0.1853	0.1188	0.1347
	9725	0.0889	0.0982	0.0825	0.0976	0.0869	0.1093	0.1856	0.1218	0.1354
	97333	0.0887	0.098	0.0825	0.0974	0.0871	0.1096	0.187	0.1254	0.1359
	97417	0.0887	0.0979	0.0823	0.0974	0.0872	0.1095	0.1879	0.1293	0.1365
	9.75	0.0886	0.0977	0.0825	0.0974	0.0869	0.1095	0.189	0.1324	0.1369
	97583	0.0884	0.0973	0.0823	0.0974	0.0871	0.1096	0.1902	0.135	0.1377
	97667	0.0883	0.0973	0.0822	0.0974	0.0871	0.1098	0.1913	0.1368	0.1382
	9775	0.0884	0.0971	0.0823	0.0973	0.0872	0.1098	0.1926	0.138	0.1391
	97833	0.0886	0.0973	0.0822	0.0974	0.0869	0.1098	0.1939	0.1389	0.1397
	97917	0.0884	0.0971	0.0822	0.0973	0.0867	0.1096	0.1946	0.1394	0.1409
	9.8	0.0886	0.0971	0.0822	0.0973	0.0871	0.1096	0.1958	0.14	0.1417
	98083	0.0889	0.0973	0.082	0.0973	0.0869	0.1098	0.1969	0.1405	0.1426
	98167	0.0892	0.0973	0.082	0.0971	0.0867	0.1096	0.1983	0.1414	0.1438
	9825	0.0896	0.0976	0.0823	0.0971	0.0867	0.1096	0.1995	0.1417	0.1449
	98333	0.0901	0.0979	0.0822	0.0971	0.0864	0.1096	0.2006	0.1423	0.146
	98417	0.0906	0.0982	0.0817	0.097	0.0866	0.1095	0.2018	0.1431	0.1467
	9.85	0.0912	0.0988	0.0817	0.097	0.0869	0.1093	0.2033	0.144	0.1475
	98583	0.0916	0.0991	0.0817	0.097	0.0867	0.1093	0.2042	0.1449	0.1487
	98667	0.0922	0.1	0.0819	0.0968	0.0869	0.1095	0.2059	0.1458	0.1495
	9875	0.0933	0.1005	0.0817	0.0967	0.0866	0.1093	0.2071	0.1467	0.1504
	98833	0.0944	0.1015	0.0816	0.0967	0.0866	0.1095	0.2084	0.1479	0.1511
	98917	0.0954	0.1026	0.0817	0.0967	0.0867	0.1093	0.2099	0.1492	0.1521
	9.9	0.0971	0.104	0.0816	0.0967	0.0866	0.1093	0.2108	0.1498	0.1527
	99083	0.0986	0.1057	0.0814	0.0967	0.0867	0.1093	0.2123	0.1505	0.1534
	99167	0.1008	0.1077	0.0814	0.0967	0.0864	0.1093	0.214	0.1516	0.154
	9925	0.1031	0.1104	0.0816	0.0965	0.0863	0.1093	0.2158	0.1522	0.1553
	99333	0.1058	0.1136	0.0814	0.0965	0.0864	0.1092	0.2178	0.1531	0.1562
	99417	0.1092	0.1177	0.0813	0.0964	0.0866	0.1092	0.22	0.1537	0.1572
	9.95	0.1128	0.1235	0.0814	0.0964	0.0866	0.109	0.2238	0.1547	0.1588
	99583	0.118	0.1312	0.0811	0.0965	0.0863	0.1092	0.2282	0.1553	0.1601
	99667	0.1241	0.1427	0.0813	0.0962	0.0863	0.1092	0.2323	0.1559	0.1617
	9975	0.1327	0.1591	0.0813	0.0964	0.0863	0.1093	0.2364	0.1565	0.1637
	99833	0.145	0.1769	0.0811	0.0965	0.0864	0.1092	0.2404	0.1571	0.1658
	99917	0.1611	0.1839	0.0809	0.0961	0.0864	0.109	0.243	0.158	0.1684
	10	0.1746	0.1847	0.0809	0.0961	0.0864	0.1092	0.2439	0.1589	0.171
	100083	0.1783	0.1844	0.0809	0.0962	0.0861	0.1092	0.2441	0.1598	0.174
	100167	0.1783	0.1833	0.0808	0.0961	0.0863	0.1092	0.2442	0.1611	0.1771
	10025	0.1774	0.1824	0.0806	0.0962	0.0861	0.1093	0.2435	0.1623	0.1801
	100333	0.1766	0.1814	0.0808	0.0959	0.086	0.1092	0.2427	0.1633	0.1833
	100417	0.1756	0.1806	0.0806	0.0961	0.086	0.1092	0.2418	0.1649	0.1861
	10.05	0.1746	0.1798	0.0808	0.0954	0.0861	0.1092	0.2412	0.167	0.1885
	100583	0.1737	0.1786	0.0806	0.0956	0.086	0.1092	0.2404	0.1695	0.1902
	100667	0.1727	0.1774	0.0809	0.0956	0.086	0.109	0.2398	0.1727	0.1914
	10075	0.172	-0.0994	0.0809	0.0958	0.0858	0.1092	0.2392	0.1765	0.1922
	100833	-0.0849	-0.1273	0.0808	0.0954	0.086	0.109	0.2386	0.1814	0.1922
	100917	-0.1154	-0.1252	-0.0188	-0.0364	-0.0295	0.109	-0.0912	0.1864	0.1919
	10.1	-0.1112	-0.1221	-0.0555	-0.07	-0.0646	0.109	-0.1147	0.1908	0.1916
	101083	-0.1075	-0.1203	-0.0637	-0.0767	-0.0715	0.109	-0.1124	0.1942	-0.061
	101167	-0.1041	-0.118	-0.069	-0.0814	-0.0759	0.1092	-0.1099	0.1958	-0.1002
	10125	-0.1006	-0.1151	-0.0727	-0.0846	-0.079	-0.0501	-0.1112	0.1963	-0.1048
	101333	-0.0982	-0.1124	-0.0753	-0.0867	-0.0811	-0.0874	-0.1142	0.1962	-0.1066
	101417	-0.0959	-0.1104	-0.0768	-0.0883	-0.0825	-0.095	-0.1183	0.1957	-0.109
	10.15	-0.0945	-0.1084	-0.0779	-0.0895	-0.0835	-0.0997	-0.1237	0.1951	-0.1122
	101583	-0.0933	-0.1067	-0.0788	-0.0901	-0.0845	-0.1028	-0.1318	0.1946	-0.116
	101667	-0.0924	-0.1054	-0.0793	-0.0906	-0.0849	-0.1046	-0.1379	0.1942	-0.1206
	101667	-0.0916	-0.1043	-0.0796	-0.0907	-0.0854	-0.1063	-0.1424	-0.0593	-0.1267
	10175	-0.0912	-0.1035	-0.0799	-0.0912	-0.0855	-0.1069	-0.1447	-0.1072	-0.1322
	101833	-0.0907	-0.1028	-0.08	-0.0909	-0.0857	-0.1078	-0.147	-0.113	-0.1374
	101917	-0.0901	-0.1019	-0.0802	-0.091	-0.0857	-0.1081	-0.1485	-0.1164	-0.1405
	10.2	-0.0901	-0.1012	-0.0802	-0.091	-0.0857	-0.1086	-0.1501	-0.1191	-0.1434
	102083	-0.0898	-0.1008	-0.0803	-0.0909	-0.0858	-0.1087	-0.1513	-0.1221	-0.1449
	102167	-0.0896	-0.1005	-0.0803	-0.0909	-0.0858	-0.1087	-0.1522	-0.1249	-0.1461
	10225	-0.0895	-0.1002	-0.0803	-0.0907	-0.086	-0.1089	-0.1527	-0.1278	-0.1469
	102333	-0.0895	-0.0996	-0.0802	-0.0906	-0.0858	-0.1089	-0.1537	-0.1312	-0.1475
	102417	-0.0893	-0.0993	-0.0803	-0.0906	-0.0858	-0.1089	-0.1547	-0.1344	-0.1479
	10.25	-0.0893	-0.099	-0.0803	-0.0904	-0.0858	-0.1089	-0.1554	-0.1369	-0.1485
	102583	-0.0893	-0.0986	-0.0802	-0.0903	-0.0857	-0.1087	-0.1566	-0.1389	-0.1495
	102667	-0.0892	-0.0988	-0.0803	-0.0901	-0.0857	-0.1087	-0.1582	-0.14	-0.1505
	10275	-0.0893	-0.0985	-0.0802	-0.0898	-0.0857	-0.1087	-0.1594	-0.1411	-0.1518
	102833	-0.0892	-0.0983	-0.0803	-0.0898	-0.0855	-0.109	-0.1609	-0.1417	-0.1533
	102917	-0.0893	-0.0983	-0.0802	-0.0898	-0.0857	-0.1087	-0.162	-0.1421	-0.1547
	10.3	-0.0895	-0.0982	-0.0803	-0.0898	-0.0855	-0.1086	-0.1632	-0.1427	-0.1563
	103083	-0.0898	-0.0985	-0.0799	-0.0895	-0.0855	-0.1086	-0.1647	-0.1431	-0.1574
	103167	-0.0898	-0.0986	-0.0803	-0.0892	-0.0855	-0.1086	-0.1658	-0.1437	-0.1585
	10325	-0.0901	-0.0991	-0.0802	-0.0892	-0.0855	-0.1084	-0.1673	-0.1444	-0.1597
	103333	-0.0909	-0.0993	-0.0803	-0.0889	-0.0855	-0.1087	-0.1684	-0.1452	-0.1604
	103417	-0.0915	-0.0996	-0.0802	-0.0887	-0.0855	-0.1086	-0.1696	-0.1461	-0.1611
	10.35	-0.0919	-0.1002	-0.0802	-0.0887	-0.0854	-0.1086	-0.171	-0.1472	-0.162
	103583	-0.0924	-0.1006	-0.0802	-0.0886	-0.0854	-0.1084	-0.1719	-0.1482	-0.1624
	103667	-0.0932	-0.1009	-0.08	-0.0886	-0.0852	-0.1084	-0.1731	-0.1495	-0.1632
	10375	-0.0944	-0.1012	-0.0802	-0.0886	-0.0852	-0.1084	-0.174	-0.1505	-0.1638
	103833	-0.0953	-0.102	-0.0802	-0.0883	-0.0851	-0.1083	-0.1751	-0.1516	-0.1646
	103917	-0.0965	-0.1026	-0.08	-0.0881	-0.0851	-0.1083	-0.1762	-0.1527	-0.1644
	10.4	-0.0982	-0.1035	-0.08	-0.0881	-0.0852	-0.1081	-0.1775	-0.1534	-0.1652
	104083	-0.1	-0.1048	-0.0802	-0.088	-0.0849	-0.1081	-0.1786	-0.1542	-0.1661
	104167	-0.1023	-0.1057	-0.08	-0.0878	-0.0851	-0.1081	-0.1803	-0.1553	-0.1673
	10425	-0.1049	-0.1075	-0.08	-0.0875	-0.0848	-0.1083	-0.1823	-0.1562	-0.1682
	104333	-0.1084	-0.1098	-0.08	-0.088	-0.0849	-0.1083	-0.1843	-0.1569	-0.1699
	104417	-0.1116	-0.113	-0.0799	-0.0877	-0.0848	-0.1081	-0.1864	-0.1575	-0.1714
	10.45	-0.1162	-0.117	-0.0799	-0.0877	-0.0848	-0.1081	-0.1896	-0.1582	-0.1737
	104583	-0.1218	-0.1223	-0.0799	-0.0874	-0.0846	-0.108	-0.193	-0.1591	-0.1763
	104667	-0.1286	-0.1305	-0.0799	-0.0872	-0.0845	-0.108	-0.1972	-0.1598	-0.18
	10475	-0.1377	-0.1426	-0.08	-0.0872	-0.0846	-0.108	-0.2021	-0.1608	-0.1833
	104833	-0.1492	-0.1589	-0.0799	-0.0872	-0.0846	-0.108	-0.2068	-0.1615	-0.1875
	104917	-0.1618	-0.1716	-0.0802	-0.0871	-0.0845	-0.1078	-0.2096	-0.1629	-0.1914
	10.5	-0.1717	-0.1774	-0.0799	-0.0871	-0.0843	-0.1081	-0.2113	-0.1643	-0.1948
	105083	-0.1742	-0.1778	-0.08	-0.0872	-0.0843	-0.1078	-0.2119	-0.1655	-0.1978
	105167	-0.174	-0.1771	-0.0799	-0.0871	-0.0843	-0.1069	-0.2116	-0.1673	-0.2
	10525	-0.1739	-0.176	-0.0799	-0.0869	-0.0843	-0.1067	-0.2116	-0.1695	-0.2015
	105333	-0.1731	-0.1748	-0.0797	-0.0869	-0.084	-0.1066	-0.211	-0.1719	-0.2024
	105417	-0.1728	-0.1739	-0.0799	-0.0867	-0.0838	-0.1064	-0.2103	-0.1748	-0.2029
	10.55	-0.1717	-0.173	-0.0799	-0.0866	-0.084	-0.1063	-0.2097	-0.1783	-0.203
	105583	-0.1707	-0.1722	-0.0796	-0.0867	-0.0838	-0.1063	-0.2091	-0.1826	-0.2024
	105667	-0.1701	-0.1707	-0.0799	-0.0866	-0.084	-0.106	-0.2087	-0.1881	-0.202
	10575	-0.1688	0.0974	-0.0797	-0.0867	-0.0837	-0.1058	-0.2078	-0.1933	-0.2016
	105833	0.0779	0.1286	-0.0796	-0.0866	-0.0838	-0.1063	-0.2073	-0.1978	-0.2012
	105917	0.1118	0.1275	0.0184	0.0286	0.0265	-0.106	0.0701	-0.2004	-0.2004
	10.6	0.1092	0.1238	0.055	0.0649	0.0622	-0.1058	0.1075	-0.2016	-0.2001
	106083	0.1067	0.1194	0.0643	0.0727	0.0692	-0.1063	0.115	-0.202	0.0643
	106167	0.1035	0.115	0.0698	0.0785	0.0736	-0.106	0.1186	-0.2013	0.104
	10625	0.1003	0.1113	0.0733	0.0825	0.0768	0.0478	0.122	-0.201	0.1083
	106333	0.0977	0.1081	0.0759	0.0852	0.0788	0.0845	0.1267	-0.2004	0.1113
	106417	0.0958	0.1057	0.0776	0.0881	0.0805	0.0919	0.1337	-0.1998	0.1128
	10.65	0.0938	0.104	0.079	0.0895	0.0817	0.0964	0.1437	-0.1994	0.1144
	106583	0.0925	0.1026	0.0796	0.0909	0.0825	0.0996	0.1557	-0.1989	0.1157
	106667	0.0913	0.1012	0.0799	0.0915	0.0829	0.1017	0.1667	-0.1981	0.1177
	106667	0.0906	0.1005	0.0802	0.0924	0.0834	0.1032	0.1727	0.0593	0.1203
	10675	0.09	0.0996	0.0803	0.093	0.0838	0.1044	0.1749	0.1063	0.1234
	106833	0.0895	0.0988	0.0805	0.0933	0.084	0.1051	0.1765	0.1118	0.1264
	106917	0.0889	0.0983	0.0808	0.0935	0.0843	0.1057	0.1791	0.1145	0.1284
	10.7	0.0889	0.098	0.0806	0.0938	0.0845	0.1063	0.1798	0.1168	0.1302
	107083	0.0886	0.0976	0.0808	0.0938	0.0845	0.1066	0.1803	0.1191	0.1316
	107167	0.0886	0.0971	0.0808	0.0942	0.0845	0.1069	0.1814	0.1212	0.133
	10725	0.0881	0.0971	0.0808	0.0941	0.0846	0.107	0.1823	0.1238	0.1336
	107333	0.0881	0.0968	0.0806	0.0939	0.0848	0.107	0.1833	0.127	0.1342
	107417	0.0881	0.0962	0.0808	0.0941	0.0846	0.107	0.1843	0.1298	0.1348
	10.75	0.0881	0.0961	0.0811	0.0939	0.0846	0.1072	0.1853	0.1325	0.1351
	107583	0.0883	0.0961	0.0808	0.0941	0.0846	0.107	0.1865	0.135	0.1356
	107667	0.0883	0.0959	0.0808	0.0939	0.0845	0.1073	0.1872	0.1366	0.1359
	10775	0.0884	0.0959	0.0808	0.0939	0.0843	0.1072	0.1879	0.1377	0.1365
	107833	0.0884	0.0962	0.0805	0.0939	0.0843	0.1073	0.1893	0.1389	0.1371
	107917	0.0886	0.0961	0.0806	0.0939	0.0845	0.1075	0.1901	0.1397	0.138
	10.8	0.0889	0.0962	0.0805	0.0936	0.0845	0.1072	0.1908	0.1403	0.1389
	108083	0.089	0.0965	0.0805	0.0936	0.0846	0.1073	0.1919	0.1409	0.1397
	108167	0.0893	0.0967	0.0806	0.0936	0.0845	0.1072	0.1928	0.1414	0.1405
	10825	0.0896	0.097	0.0808	0.0935	0.0843	0.1073	0.1937	0.1421	0.1415
	108333	0.0906	0.0974	0.0803	0.0936	0.0845	0.1073	0.1945	0.1426	0.1423
	108417	0.0909	0.0979	0.0803	0.0935	0.0843	0.1073	0.1952	0.1431	0.1434
	10.85	0.0913	0.0986	0.0803	0.0933	0.0843	0.1072	0.1965	0.1437	0.1443
	108583	0.0921	0.0991	0.08	0.0933	0.0843	0.1072	0.1974	0.1446	0.145
	108667	0.0927	0.0996	0.08	0.0935	0.0843	0.1072	0.1986	0.1452	0.1456
	10875	0.0935	0.1005	0.08	0.0935	0.084	0.1072	0.1995	0.1461	0.1466
	108833	0.0945	0.1015	0.08	0.0933	0.0842	0.107	0.2004	0.1469	0.1472
	108917	0.0958	0.1028	0.08	0.0932	0.084	0.107	0.201	0.1479	0.1481
	10.9	0.0971	0.1041	0.0799	0.0932	0.084	0.1072	0.2021	0.1489	0.1487
	109083	0.0985	0.1058	0.0799	0.0929	0.0842	0.107	0.2032	0.1496	0.149
	109167	0.1	0.1078	0.0797	0.093	0.084	0.1073	0.2045	0.1502	0.1498
	10925	0.1023	0.1102	0.0799	0.093	0.0842	0.1072	0.2056	0.1513	0.1504
	109333	0.1044	0.1135	0.08	0.0929	0.084	0.107	0.2074	0.1519	0.1516
	109417	0.1072	0.1176	0.0799	0.0929	0.0842	0.1069	0.2091	0.1525	0.1524
	10.95	0.1112	0.1226	0.0797	0.093	0.0838	0.107	0.2114	0.1533	0.1534
	109583	0.1153	0.1302	0.0797	0.0927	0.0838	0.107	0.2142	0.1537	0.1547
	109667	0.1212	0.1409	0.0797	0.093	0.0835	0.1069	0.2175	0.1545	0.1563
	10975	0.1289	0.158	0.0797	0.0929	0.0838	0.1067	0.2221	0.1551	0.158
	109833	0.1394	0.1749	0.0797	0.093	0.0837	0.107	0.2273	0.1559	0.1595
	109917	0.1543	0.1817	0.0796	0.0927	0.0838	0.1069	0.232	0.1565	0.1618
	11	0.1698	0.1817	0.0797	0.0925	0.0837	0.1067	0.2349	0.1577	0.1643
	110083	0.1757	0.1806	0.0797	0.0927	0.0838	0.1069	0.236	0.1586	0.1669
	110167	0.1765	0.1798	0.0797	0.0925	0.0837	0.1069	0.2367	0.1595	0.1702
	11025	0.1754	0.1791	0.0794	0.0924	0.0835	0.1067	0.2363	0.1604	0.1734
	110333	0.1742	0.1781	0.0794	0.0925	0.0837	0.1069	0.2358	0.162	0.1771
	110417	0.1733	0.1772	0.0793	0.0924	0.0834	0.1069	0.2352	0.1633	0.1804
	11.05	0.1725	0.1763	0.0793	0.0924	0.0834	0.1066	0.2346	0.1655	0.1833
	110583	0.1717	0.1756	0.0793	0.0924	0.0835	0.1067	0.2335	0.1678	0.1858
	110667	0.1705	0.1746	0.0796	0.0924	0.0832	0.1066	0.2331	0.1707	0.1875
	11075	0.1699	-0.0971	0.0791	0.0922	0.0832	0.1066	0.232	0.1743	0.1887
	110833	-0.084	-0.1263	0.0794	0.0921	0.0834	0.1066	0.2317	0.1786	0.189
	110917	-0.1153	-0.1249	-0.0182	-0.0336	-0.0277	0.1066	-0.0896	0.1835	0.1893
	11.1	-0.1116	-0.1225	-0.0538	-0.0672	-0.0619	0.1066	-0.1119	0.1882	0.1888
	111083	-0.1075	-0.1191	-0.0623	-0.0739	-0.0689	0.1064	-0.1122	0.1922	-0.0616
	111167	-0.1038	-0.1165	-0.0678	-0.0787	-0.0732	0.1066	-0.1121	0.1946	-0.099
	11125	-0.1005	-0.1139	-0.0713	-0.0816	-0.0759	-0.0486	-0.1116	0.1955	-0.1038
	111333	-0.0979	-0.111	-0.0736	-0.0838	-0.0782	-0.0854	-0.1144	0.1958	-0.1067
	111417	-0.0954	-0.1086	-0.0755	-0.0851	-0.0797	-0.0927	-0.1183	0.1955	-0.1096
	11.15	-0.0941	-0.1069	-0.0765	-0.0861	-0.0809	-0.0973	-0.1221	0.1948	-0.1127
	111583	-0.0925	-0.1052	-0.0773	-0.0867	-0.0814	-0.1003	-0.1284	0.1945	-0.1162
	111667	-0.0916	-0.1037	-0.078	-0.0875	-0.0819	-0.1023	-0.1347	0.1943	-0.1208
	111667	-0.0909	-0.1031	-0.0784	-0.0877	-0.0826	-0.1038	-0.1418	-0.0632	-0.126
	11175	-0.0903	-0.102	-0.0785	-0.0875	-0.0828	-0.1048	-0.1453	-0.1098	-0.1322
	111833	-0.0898	-0.1012	-0.0788	-0.0877	-0.0829	-0.1055	-0.1481	-0.1157	-0.1374
	111917	-0.0893	-0.1009	-0.079	-0.0875	-0.0831	-0.1063	-0.1501	-0.1186	-0.1414
	11.2	-0.0892	-0.1005	-0.0791	-0.0875	-0.0831	-0.106	-0.1492	-0.1211	-0.144
	112083	-0.089	-0.1	-0.079	-0.0877	-0.0832	-0.1066	-0.1501	-0.1229	-0.1449
	112167	-0.0889	-0.0997	-0.0793	-0.0875	-0.0834	-0.1066	-0.1514	-0.1252	-0.1456
	11225	-0.089	-0.0991	-0.0793	-0.0877	-0.0832	-0.1066	-0.1525	-0.1278	-0.1463
	112333	-0.0886	-0.0988	-0.0794	-0.0877	-0.0835	-0.1067	-0.153	-0.131	-0.1467
	112417	-0.0886	-0.0985	-0.0793	-0.0875	-0.0832	-0.1069	-0.1536	-0.1341	-0.1473
	11.25	-0.0886	-0.098	-0.0791	-0.0875	-0.0834	-0.1067	-0.1545	-0.1362	-0.1478
	112583	-0.0886	-0.0979	-0.0793	-0.0875	-0.0835	-0.1066	-0.1557	-0.1383	-0.1487
	112667	-0.0886	-0.0979	-0.0791	-0.0874	-0.0834	-0.1067	-0.1572	-0.1397	-0.1495
	11275	-0.0887	-0.0979	-0.0791	-0.0874	-0.0834	-0.1066	-0.1585	-0.1411	-0.1505
	112833	-0.0889	-0.0979	-0.0791	-0.0874	-0.0834	-0.1066	-0.16	-0.1418	-0.1518
	112917	-0.0889	-0.0979	-0.0791	-0.0872	-0.0834	-0.1064	-0.1604	-0.1427	-0.1527
	11.3	-0.089	-0.0979	-0.0793	-0.0872	-0.0831	-0.1064	-0.1611	-0.1432	-0.1537
	113083	-0.0893	-0.098	-0.0794	-0.0866	-0.0834	-0.1064	-0.162	-0.1435	-0.1548
	113167	-0.0895	-0.0985	-0.0793	-0.0861	-0.0831	-0.1064	-0.1637	-0.1438	-0.1559
	11325	-0.09	-0.0986	-0.0794	-0.086	-0.0831	-0.1064	-0.1647	-0.1441	-0.1565
	113333	-0.0903	-0.0988	-0.0793	-0.0857	-0.0831	-0.1063	-0.1658	-0.145	-0.1574
	113417	-0.0909	-0.0991	-0.0794	-0.0857	-0.0832	-0.1066	-0.167	-0.1458	-0.1577
	11.35	-0.0918	-0.0996	-0.0791	-0.0855	-0.0831	-0.1063	-0.1679	-0.1466	-0.1585
	113583	-0.0924	-0.1	-0.0793	-0.0855	-0.0832	-0.1063	-0.1685	-0.1472	-0.1591
	113667	-0.0932	-0.1002	-0.0793	-0.0852	-0.0829	-0.1061	-0.1695	-0.1482	-0.1598
	11375	-0.0942	-0.1006	-0.0793	-0.0854	-0.0829	-0.1063	-0.1707	-0.1493	-0.1604
	113833	-0.095	-0.1011	-0.0793	-0.0851	-0.0829	-0.106	-0.1713	-0.1501	-0.1611
	113917	-0.0962	-0.1017	-0.0793	-0.0849	-0.0828	-0.1057	-0.1725	-0.1508	-0.1618
	11.4	-0.0973	-0.1028	-0.0793	-0.0848	-0.0828	-0.106	-0.1734	-0.1519	-0.1624
	114083	-0.0986	-0.1035	-0.0791	-0.0848	-0.0825	-0.1058	-0.1745	-0.1527	-0.1635
	114167	-0.1005	-0.1049	-0.0793	-0.0848	-0.0826	-0.1058	-0.1759	-0.1534	-0.1646
	11425	-0.1026	-0.1066	-0.0793	-0.0846	-0.0825	-0.1057	-0.1768	-0.1537	-0.1658
	114333	-0.1051	-0.1086	-0.0793	-0.0846	-0.0826	-0.1055	-0.1783	-0.1543	-0.1673
	114417	-0.1084	-0.1115	-0.079	-0.0845	-0.0825	-0.1028	-0.18	-0.1551	-0.1688
	11.45	-0.1122	-0.1148	-0.0791	-0.0845	-0.0826	-0.1026	-0.1824	-0.1557	-0.1708
	114583	-0.117	-0.1202	-0.0791	-0.0845	-0.0825	-0.1026	-0.1853	-0.1566	-0.1731
	114667	-0.1229	-0.1269	-0.0791	-0.0845	-0.0823	-0.1025	-0.1891	-0.1574	-0.1759
	11475	-0.1305	-0.138	-0.079	-0.0843	-0.0823	-0.1026	-0.1937	-0.158	-0.1794
	114833	-0.1408	-0.1533	-0.079	-0.0842	-0.0823	-0.1025	-0.1989	-0.1594	-0.1829
	114917	-0.1534	-0.1676	-0.0788	-0.084	-0.0823	-0.1025	-0.2033	-0.1603	-0.187
	11.5	-0.1655	-0.174	-0.0788	-0.0842	-0.0822	-0.1023	-0.2064	-0.1612	-0.191
	115083	-0.1713	-0.1748	-0.0788	-0.0838	-0.0823	-0.1023	-0.2074	-0.1627	-0.1943
	115167	-0.1722	-0.1737	-0.079	-0.0838	-0.0823	-0.1023	-0.2079	-0.1646	-0.1969
	11525	-0.1716	-0.173	-0.079	-0.0838	-0.0822	-0.1022	-0.2076	-0.1666	-0.1986
	115333	-0.1711	-0.1719	-0.0788	-0.084	-0.0823	-0.1019	-0.2071	-0.1687	-0.1997
	115417	-0.1687	-0.1708	-0.079	-0.0838	-0.0822	-0.1023	-0.2068	-0.1717	-0.2001
	11.55	-0.169	-0.1704	-0.0788	-0.0837	-0.0822	-0.1022	-0.2061	-0.1751	-0.2
	115583	-0.1681	-0.1696	-0.0788	-0.0837	-0.082	-0.1019	-0.2058	-0.1791	-0.1998
	115667	-0.1673	-0.1688	-0.0787	-0.0835	-0.082	-0.1017	-0.2052	-0.1839	-0.1994
	11575	-0.1661	0.0947	-0.0788	-0.0835	-0.082	-0.1019	-0.2045	-0.1891	-0.1992
	115833	0.0755	0.1273	-0.0788	-0.0834	-0.0819	-0.1019	-0.2041	-0.1939	-0.1983
	115917	0.1119	0.1269	0.0176	0.0263	0.0253	-0.1019	0.0701	-0.1977	-0.1981
	11.6	0.1098	0.1235	0.0541	0.0631	0.0603	-0.1019	0.1112	-0.1995	-0.1975
	116083	0.1073	0.1194	0.0631	0.0713	0.0675	-0.1017	0.1144	-0.2003	0.0663
	116167	0.1037	0.115	0.0686	0.0767	0.0718	-0.1019	0.1167	-0.1998	0.104
	11625	0.1005	0.1109	0.0721	0.0808	0.0748	0.0445	0.1196	-0.1997	0.1084
	116333	0.0977	0.1078	0.0745	0.0838	0.0771	0.0803	0.1231	-0.1991	0.1107
	116417	0.0951	0.1048	0.0762	0.0858	0.0784	0.088	0.1286	-0.1986	0.1122
	11.65	0.0933	0.1034	0.0771	0.0875	0.0797	0.0927	0.1392	-0.198	0.1141
	116583	0.0921	0.1015	0.078	0.0887	0.0803	0.0956	0.1514	-0.1971	0.1157
	116667	0.091	0.1008	0.0785	0.0895	0.0809	0.0977	0.1629	-0.1968	0.1174
	116667	0.0904	0.0999	0.0788	0.0901	0.0814	0.0997	0.1717	0.061	0.1194
	11675	0.0893	0.0991	0.079	0.0907	0.082	0.1005	0.176	0.1073	0.1211
	116833	0.089	0.0983	0.0793	0.0909	0.082	0.1012	0.1774	0.1127	0.1237
	116917	0.0886	0.098	0.0794	0.0912	0.0823	0.1017	0.1783	0.1151	0.1255
	11.7	0.0884	0.0977	0.0796	0.0915	0.0822	0.1022	0.1791	0.1179	0.1269
	117083	0.0883	0.0974	0.0794	0.0915	0.0825	0.1023	0.18	0.1205	0.1287
	117167	0.0881	0.097	0.0797	0.0915	0.0828	0.1026	0.181	0.1232	0.1298
	11725	0.0881	0.0965	0.0794	0.0916	0.0825	0.1026	0.1818	0.1254	0.1312
	117333	0.0881	0.0965	0.0796	0.0918	0.0825	0.1029	0.183	0.1275	0.1319
	117417	0.088	0.0962	0.0794	0.0915	0.0826	0.1029	0.1841	0.1302	0.1325
	11.75	0.088	0.0961	0.0796	0.0915	0.0829	0.1031	0.1856	0.1325	0.1328
	117583	0.0878	0.0961	0.0796	0.0916	0.0828	0.1031	0.1864	0.1347	0.1333
	117667	0.0881	0.0961	0.0796	0.0916	0.0826	0.1029	0.1873	0.1359	0.1337
	11775	0.0881	0.0961	0.0796	0.0916	0.0828	0.1031	0.1882	0.1376	0.1347
	117833	0.0883	0.0962	0.0797	0.0915	0.0826	0.1031	0.1894	0.1382	0.1353
	117917	0.0886	0.0964	0.0796	0.0915	0.0828	0.1031	0.1899	0.1391	0.1357
	11.8	0.0889	0.0964	0.0794	0.0913	0.0826	0.1029	0.1911	0.14	0.1362
	118083	0.0889	0.0965	0.0797	0.0915	0.0826	0.1031	0.1919	0.1406	0.1368
	118167	0.0895	0.0968	0.0796	0.0913	0.0825	0.1031	0.1928	0.1411	0.1376
	11825	0.09	0.0968	0.0797	0.0915	0.0826	0.1031	0.1936	0.1417	0.1385
	118333	0.0904	0.0974	0.0794	0.0912	0.0826	0.1029	0.1943	0.1421	0.1391
	118417	0.0909	0.0979	0.0794	0.0913	0.0825	0.1028	0.1952	0.1427	0.1398
	11.85	0.0915	0.0983	0.0796	0.091	0.0823	0.1031	0.1963	0.1432	0.1408
	118583	0.0921	0.099	0.0793	0.091	0.0823	0.1029	0.1972	0.1441	0.1414
	118667	0.0927	0.0996	0.0793	0.091	0.0822	0.1029	0.1983	0.1447	0.1421
	11875	0.0935	0.1005	0.0793	0.0909	0.0822	0.1029	0.1991	0.1453	0.1426
	118833	0.0947	0.1011	0.0793	0.091	0.082	0.1026	0.2	0.1461	0.1431
	118917	0.0958	0.1026	0.0793	0.0909	0.0823	0.1029	0.2007	0.1469	0.1437
	11.9	0.0967	0.1038	0.0791	0.0907	0.0822	0.1028	0.2016	0.1479	0.1446
	119083	0.098	0.1049	0.0791	0.0909	0.0822	0.1028	0.2026	0.1485	0.1453
	119167	0.0996	0.107	0.079	0.0907	0.0822	0.1028	0.2035	0.1492	0.146
	11925	0.1012	0.109	0.079	0.0907	0.0823	0.1026	0.2049	0.1498	0.1466
	119333	0.1037	0.1118	0.0791	0.0904	0.0822	0.1028	0.2064	0.1505	0.1473
	119417	0.1061	0.1151	0.079	0.0906	0.0822	0.1026	0.2082	0.1514	0.1482
	11.95	0.1092	0.1194	0.0788	0.0906	0.082	0.1026	0.2102	0.1521	0.1495
	119583	0.1135	0.1257	0.0788	0.0904	0.0822	0.1026	0.2125	0.1528	0.1505
	119667	0.1185	0.1351	0.0788	0.0904	0.0822	0.1026	0.216	0.1531	0.1521
	11975	0.1247	0.149	0.079	0.0906	0.082	0.1025	0.2207	0.1539	0.1533
	119833	0.1336	0.1666	0.0787	0.0904	0.0819	0.1026	0.2259	0.1547	0.1551
	119917	0.1463	0.1783	0.0787	0.0901	0.0819	0.1025	0.2309	0.1553	0.1569
	12	0.1624	0.1803	0.0787	0.0903	0.0819	0.1022	0.2343	0.1559	0.1592
	120083	0.1716	0.1797	0.0787	0.0903	0.0819	0.1023	0.2357	0.1569	0.1618
	120167	0.1731	0.1785	0.0787	0.0904	0.0819	0.1022	0.2364	0.158	0.1652
	12025	0.1731	0.1777	0.0787	0.0901	0.0817	0.1023	0.2364	0.1592	0.1685
	120333	0.1722	0.1766	0.0788	0.0903	0.0819	0.1023	0.2358	0.1603	0.1722
	120417	0.1711	0.1757	0.0785	0.0901	0.0819	0.1022	0.2354	0.162	0.1763
	12.05	0.171	0.1743	0.0784	0.0901	0.0817	0.1023	0.2351	0.1638	0.1795
	120583	0.1698	0.1737	0.0785	0.09	0.0817	0.1022	0.2345	0.1661	0.182
	120667	0.1684	0.173	0.0784	0.0896	0.0817	0.1022	0.234	0.1688	0.1838
	12075	0.1676	-0.0954	0.0787	0.09	0.0817	0.1022	0.2334	0.1727	0.1847
	120833	-0.082	-0.1266	0.0785	0.09	0.0814	0.1022	0.2328	0.1766	0.1849
	120917	-0.115	-0.1252	-0.0181	-0.0326	-0.0263	0.102	-0.0921	0.1814	0.185
	12.1	-0.1109	-0.1225	-0.053	-0.0613	-0.0602	0.102	-0.1141	0.1859	0.1847
	121083	-0.1067	-0.12	-0.0617	-0.0681	-0.0669	0.1019	-0.1131	0.1897	-0.0613
	121167	-0.1028	-0.1168	-0.0671	-0.0724	-0.0713	0.102	-0.1095	0.1926	-0.0988
	12125	-0.0997	-0.1138	-0.0706	-0.0756	-0.0744	-0.0448	-0.1115	0.1936	-0.1032
	121333	-0.097	-0.1112	-0.0732	-0.0776	-0.0762	-0.0808	-0.1144	0.1939	-0.1064
	121417	-0.0951	-0.1086	-0.0747	-0.0791	-0.0779	-0.0884	-0.1194	0.1937	-0.1092
	12.15	-0.0932	-0.1069	-0.0759	-0.0802	-0.0791	-0.0932	-0.1232	0.1934	-0.1118
	121583	-0.0919	-0.1054	-0.0767	-0.0813	-0.0797	-0.0962	-0.1295	0.193	-0.1153
	121667	-0.0912	-0.1043	-0.077	-0.0817	-0.0805	-0.0982	-0.1357	0.1923	-0.1196
	121667	-0.0904	-0.1032	-0.0777	-0.0822	-0.0808	-0.0994	-0.1403	-0.0654	-0.1249
	12175	-0.09	-0.1022	-0.078	-0.0825	-0.0813	-0.1003	-0.1443	-0.1077	-0.1304
	121833	-0.0895	-0.1017	-0.0779	-0.0825	-0.0814	-0.1011	-0.1464	-0.1133	-0.1356
	121917	-0.0892	-0.1009	-0.0785	-0.0831	-0.0816	-0.1014	-0.1479	-0.1168	-0.1386
	12.2	-0.0892	-0.1005	-0.0782	-0.0829	-0.0817	-0.1017	-0.1499	-0.1191	-0.1405
	122083	-0.089	-0.1003	-0.0787	-0.0831	-0.0817	-0.102	-0.151	-0.1214	-0.1415
	122167	-0.0887	-0.0999	-0.0787	-0.0831	-0.082	-0.1023	-0.1522	-0.124	-0.1424
	12225	-0.0886	-0.0994	-0.0787	-0.0831	-0.0819	-0.1025	-0.1528	-0.1263	-0.1431
	122333	-0.0884	-0.0991	-0.0784	-0.0829	-0.0819	-0.1025	-0.1539	-0.1292	-0.1435
	122417	-0.0884	-0.099	-0.0784	-0.0829	-0.0819	-0.1023	-0.155	-0.1324	-0.1437
	12.25	-0.0886	-0.0986	-0.0787	-0.0832	-0.0819	-0.1025	-0.1557	-0.1354	-0.1444
	122583	-0.0884	-0.0985	-0.0787	-0.0831	-0.0819	-0.1025	-0.1568	-0.1371	-0.1449
	122667	-0.0883	-0.0985	-0.0785	-0.0832	-0.0819	-0.1022	-0.1579	-0.1388	-0.1456
	12275	-0.0884	-0.0983	-0.0787	-0.0829	-0.0819	-0.1026	-0.1588	-0.1397	-0.1464
	122833	-0.0884	-0.0986	-0.0784	-0.0831	-0.0819	-0.102	-0.1598	-0.1405	-0.1473
	122917	-0.0886	-0.0986	-0.0782	-0.0829	-0.0819	-0.1022	-0.1609	-0.1409	-0.1482
	12.3	-0.0889	-0.0985	-0.0784	-0.0828	-0.0817	-0.1023	-0.1618	-0.1414	-0.1495
	123083	-0.089	-0.0986	-0.0785	-0.0828	-0.0819	-0.1022	-0.1626	-0.1415	-0.1507
	123167	-0.0895	-0.0993	-0.0784	-0.0828	-0.0817	-0.1022	-0.1637	-0.1418	-0.1513
	12325	-0.0896	-0.0993	-0.0782	-0.0826	-0.0817	-0.102	-0.1649	-0.1421	-0.1524
	123333	-0.0901	-0.0996	-0.0785	-0.0826	-0.0817	-0.1022	-0.1659	-0.1434	-0.1528
	123417	-0.0906	-0.0996	-0.0782	-0.0826	-0.0814	-0.102	-0.1669	-0.144	-0.1534
	12.35	-0.0913	-0.1	-0.0784	-0.0826	-0.0816	-0.1017	-0.1679	-0.1446	-0.1542
	123583	-0.0918	-0.1003	-0.0784	-0.0825	-0.0816	-0.1019	-0.1687	-0.1453	-0.1548
	123667	-0.0924	-0.1003	-0.0784	-0.0823	-0.0813	-0.1019	-0.1695	-0.1463	-0.1553
	12375	-0.093	-0.1011	-0.078	-0.0822	-0.0814	-0.1019	-0.1704	-0.1472	-0.156
	123833	-0.0941	-0.1014	-0.0782	-0.0823	-0.0813	-0.1017	-0.1704	-0.1481	-0.1568
	123917	-0.0948	-0.102	-0.0782	-0.082	-0.0813	-0.1017	-0.1713	-0.1489	-0.1574
	12.4	-0.0959	-0.1031	-0.078	-0.0819	-0.0813	-0.1017	-0.172	-0.1496	-0.158
	124083	-0.097	-0.1038	-0.0782	-0.0819	-0.0813	-0.1017	-0.1728	-0.1501	-0.1586
	124167	-0.0983	-0.1048	-0.0785	-0.0819	-0.0813	-0.1017	-0.1739	-0.1507	-0.1603
	12425	-0.1002	-0.1064	-0.078	-0.0817	-0.0813	-0.1014	-0.1752	-0.1513	-0.1612
	124333	-0.1023	-0.1086	-0.0782	-0.0817	-0.0813	-0.1012	-0.1763	-0.1521	-0.1626
	124417	-0.1051	-0.1112	-0.0782	-0.0816	-0.0809	-0.1014	-0.178	-0.1525	-0.164
	12.45	-0.1086	-0.1144	-0.078	-0.0816	-0.0811	-0.1012	-0.18	-0.1531	-0.1659
	124583	-0.1127	-0.1188	-0.078	-0.0814	-0.0809	-0.1012	-0.1821	-0.154	-0.1681
	124667	-0.1188	-0.1252	-0.078	-0.0814	-0.0811	-0.1012	-0.1852	-0.1547	-0.1705
	12475	-0.1261	-0.135	-0.078	-0.0814	-0.0809	-0.1011	-0.1891	-0.1556	-0.1737
	124833	-0.1353	-0.1495	-0.0779	-0.0814	-0.0809	-0.1012	-0.1934	-0.1565	-0.1772
	124917	-0.1463	-0.1649	-0.0779	-0.0813	-0.0809	-0.1012	-0.1986	-0.1577	-0.1809
	12.5	-0.1585	-0.1725	-0.078	-0.0811	-0.0808	-0.1014	-0.203	-0.1586	-0.185
	125083	-0.1673	-0.1734	-0.0779	-0.0813	-0.0809	-0.1011	-0.2055	-0.16	-0.1888
	125167	-0.1701	-0.1725	-0.0779	-0.0811	-0.0808	-0.1012	-0.2064	-0.1614	-0.1922
	12525	-0.1696	-0.1717	-0.0779	-0.0811	-0.0806	-0.1011	-0.2062	-0.1632	-0.1943
	125333	-0.169	-0.171	-0.0779	-0.0811	-0.0806	-0.1011	-0.2065	-0.1653	-0.1957
	125417	-0.1682	-0.1696	-0.0779	-0.0809	-0.0805	-0.1012	-0.2059	-0.1679	-0.1968
	12.55	-0.1673	-0.1695	-0.0779	-0.0809	-0.0805	-0.1008	-0.2055	-0.1711	-0.1968
	125583	-0.1667	-0.1685	-0.0779	-0.0808	-0.0803	-0.1011	-0.2049	-0.1752	-0.1966
	125667	-0.1659	-0.1682	-0.0776	-0.0809	-0.0805	-0.1011	-0.2044	-0.1803	-0.1963
	12575	-0.1647	0.0953	-0.0777	-0.0809	-0.0806	-0.1011	-0.2041	-0.1855	-0.1957
	125833	0.0759	0.1278	-0.0779	-0.0808	-0.0803	-0.1008	-0.2033	-0.1904	-0.1955
	125917	0.1127	0.1281	0.017	0.0239	0.0243	-0.1006	0.0719	-0.1942	-0.1949
	12.6	0.111	0.125	0.0532	0.0594	0.0593	-0.1009	0.1073	-0.1965	-0.1945
	126083	0.1069	0.1197	0.0617	0.0706	0.066	-0.1006	0.1127	-0.1974	0.0661
	126167	0.1032	0.1147	0.0672	0.0761	0.0704	-0.1009	0.1156	-0.1972	0.1008
	12625	0.0996	0.111	0.0713	0.0796	0.0733	0.0439	0.117	-0.1968	0.1058
	126333	0.0965	0.1078	0.0738	0.0822	0.0755	0.0796	0.1191	-0.1963	0.1092
	126417	0.0941	0.1054	0.0755	0.084	0.0771	0.0869	0.1235	-0.196	0.1116
	12.65	0.0921	0.1034	0.0764	0.0855	0.0782	0.0916	0.1283	-0.1954	0.1136
	126583	0.0909	0.1022	0.077	0.0864	0.0793	0.0945	0.1353	-0.1948	0.1156
	126667	0.0896	0.1009	0.0779	0.0871	0.0797	0.0967	0.146	-0.1943	0.1176
	126667	0.089	0.0999	0.0784	0.0875	0.0799	0.0983	0.1586	0.0614	0.1197
	12675	0.0886	0.0993	0.0787	0.0878	0.0805	0.0993	0.1676	0.1069	0.122
	126833	0.0881	0.0986	0.079	0.088	0.0806	0.1002	0.1724	0.1116	0.1244
	126917	0.0878	0.0982	0.079	0.0884	0.0809	0.1006	0.1754	0.116	0.1261
	12.7	0.0877	0.0979	0.0788	0.0884	0.0808	0.1008	0.1762	0.1188	0.1279
	127083	0.0874	0.0973	0.079	0.0886	0.0809	0.1011	0.1766	0.1208	0.1293
	127167	0.0872	0.0971	0.0791	0.0884	0.0809	0.1012	0.1774	0.1229	0.1308
	12725	0.0871	0.0967	0.0791	0.0884	0.0809	0.1014	0.1786	0.1252	0.1318
	127333	0.0869	0.0967	0.0793	0.0887	0.0809	0.1019	0.1795	0.1273	0.1327
	127417	0.0872	0.0965	0.0793	0.0886	0.0809	0.1019	0.1806	0.1295	0.133
	12.75	0.0872	0.0964	0.0788	0.0884	0.0808	0.1017	0.1812	0.1316	0.133
	127583	0.0872	0.0965	0.0788	0.0887	0.0809	0.1019	0.1824	0.1331	0.1333
	127667	0.0872	0.0964	0.079	0.0887	0.0808	0.102	0.1832	0.135	0.1337
	12775	0.0877	0.0964	0.079	0.0883	0.0808	0.1017	0.1839	0.1362	0.1344
	127833	0.0875	0.0965	0.079	0.0884	0.0809	0.1019	0.1847	0.1376	0.135
	127917	0.088	0.0964	0.079	0.0886	0.0806	0.102	0.1858	0.1382	0.1356
	12.8	0.0883	0.0965	0.0791	0.0884	0.0808	0.102	0.1868	0.1391	0.1362
	128083	0.0884	0.0968	0.079	0.0884	0.0808	0.102	0.1878	0.1397	0.1366
	128167	0.0889	0.097	0.079	0.0884	0.0806	0.1019	0.1891	0.1403	0.1371
	12825	0.0892	0.0973	0.0788	0.0883	0.0808	0.1019	0.1894	0.1411	0.1379
	128333	0.0895	0.0976	0.0788	0.0883	0.0803	0.102	0.1902	0.1415	0.1383
	128417	0.0898	0.098	0.079	0.0886	0.0806	0.1015	0.1913	0.142	0.1388
	12.85	0.0906	0.0983	0.0788	0.0883	0.0806	0.102	0.192	0.1424	0.1395
	128583	0.091	0.0988	0.0788	0.0883	0.0805	0.1019	0.1931	0.1431	0.1403
	128667	0.0916	0.0996	0.0788	0.0881	0.0805	0.1019	0.194	0.144	0.1408
	12875	0.0924	0.1002	0.0787	0.088	0.0808	0.1019	0.1949	0.1447	0.1415
	128833	0.0932	0.1008	0.0787	0.088	0.0806	0.1017	0.1957	0.1456	0.1421
	128917	0.0942	0.1017	0.0788	0.088	0.0803	0.102	0.1965	0.1461	0.1426
	12.9	0.0953	0.1031	0.0785	0.0878	0.0806	0.1022	0.1975	0.1469	0.1434
	129083	0.0965	0.1041	0.0785	0.088	0.0805	0.102	0.1986	0.1478	0.144
	129167	0.0982	0.106	0.0787	0.0878	0.0805	0.1019	0.1998	0.1484	0.1447
	12925	0.0996	0.1077	0.0787	0.0878	0.0805	0.1017	0.2009	0.149	0.1453
	129333	0.1014	0.1099	0.0785	0.088	0.0803	0.102	0.2023	0.1499	0.146
	129417	0.104	0.1131	0.0784	0.0878	0.0803	0.1017	0.2035	0.1504	0.1467
	12.95	0.107	0.1171	0.0784	0.0877	0.0805	0.1017	0.205	0.1511	0.1475
	129583	0.1106	0.122	0.0784	0.088	0.0802	0.1017	0.2076	0.1522	0.1493
	129667	0.1153	0.1295	0.0784	0.088	0.08	0.1015	0.2105	0.1525	0.1501
	12975	0.1212	0.1412	0.0782	0.0881	0.08	0.102	0.2146	0.1533	0.1518
	129833	0.1292	0.1574	0.0782	0.0881	0.08	0.1019	0.2189	0.1543	0.1533
	129917	0.1412	0.1724	0.0782	0.0878	0.08	0.1019	0.2236	0.155	0.155
	13	0.1559	0.1763	0.0779	0.088	0.08	0.1019	0.228	0.1559	0.1568
	130083	0.1673	0.1759	0.078	0.0878	0.08	0.1017	0.2303	0.1568	0.1594
	130167	0.1708	0.1752	0.078	0.0878	0.0799	0.1015	0.2316	0.1579	0.1626
	13025	0.171	0.1746	0.078	0.0877	0.08	0.102	0.2319	0.1592	0.1659
	130333	0.1701	0.1739	0.0776	0.0878	0.08	0.1017	0.2314	0.1604	0.1698
	130417	0.1695	0.1731	0.0779	0.0877	0.0802	0.1019	0.2309	0.1621	0.1737
	13.05	0.1684	0.1724	0.0777	0.0875	0.0797	0.1019	0.2306	0.1638	0.1771
	130583	0.1676	0.1714	0.0777	0.0875	0.0799	0.1019	0.23	0.1667	0.1801
	130667	0.1667	0.1711	0.0776	0.0877	0.08	0.1017	0.2296	0.1691	0.1818
	13075	0.1661	-0.093	0.0776	0.0877	0.0802	0.1019	0.229	0.1725	0.183
	130833	-0.0808	-0.1258	0.0774	0.0877	0.08	0.1019	0.2284	0.1769	0.1836
	130917	-0.1147	-0.126	-0.0175	-0.0307	-0.0256	0.102	-0.0916	0.1812	0.1835
	13.1	-0.1112	-0.1238	-0.0526	-0.0632	-0.0584	0.1022	-0.1101	0.1858	0.1829
	131083	-0.1069	-0.1208	-0.0607	-0.0698	-0.0652	0.1017	-0.1133	0.1893	-0.0626
	131167	-0.1028	-0.1177	-0.0661	-0.0741	-0.07	0.1022	-0.1127	0.1917	-0.0993
	13125	-0.0994	-0.1139	-0.0698	-0.0771	-0.073	-0.0452	-0.1142	0.1926	-0.1044
	131333	-0.0964	-0.1113	-0.0723	-0.0794	-0.075	-0.0809	-0.1125	0.1931	-0.1083
	131417	-0.0944	-0.1086	-0.0739	-0.0809	-0.0762	-0.0887	-0.1148	0.1928	-0.1106
	13.15	-0.093	-0.1067	-0.0752	-0.082	-0.0776	-0.0935	-0.1182	0.1926	-0.1136
	131583	-0.0916	-0.1054	-0.0761	-0.0831	-0.0784	-0.0962	-0.122	0.1922	-0.1167
	131667	-0.0907	-0.1041	-0.0767	-0.0835	-0.079	-0.0983	-0.1261	0.1919	-0.1205
	131667	-0.0898	-0.1032	-0.077	-0.0835	-0.0791	-0.0997	-0.1307	-0.0677	-0.1247
	13175	-0.0895	-0.1025	-0.0773	-0.0838	-0.0794	-0.1008	-0.1354	-0.1112	-0.1293
	131833	-0.089	-0.1017	-0.0774	-0.0842	-0.0799	-0.1014	-0.1392	-0.1176	-0.1339
	131917	-0.0887	-0.1011	-0.0777	-0.084	-0.08	-0.102	-0.1429	-0.1211	-0.1374
	13.2	-0.0884	-0.1006	-0.0777	-0.0845	-0.0803	-0.1022	-0.145	-0.1241	-0.1397
	132083	-0.0881	-0.1003	-0.0779	-0.0843	-0.0805	-0.1025	-0.1464	-0.1264	-0.1406
	132167	-0.088	-0.0999	-0.0777	-0.0843	-0.0802	-0.1026	-0.1473	-0.1292	-0.1415
	13225	-0.088	-0.0997	-0.0779	-0.0842	-0.0805	-0.1026	-0.1482	-0.1318	-0.1418
	132333	-0.0878	-0.0994	-0.078	-0.0842	-0.0805	-0.1028	-0.1495	-0.1353	-0.1424
	132417	-0.0878	-0.0982	-0.078	-0.0843	-0.0805	-0.1028	-0.1504	-0.1386	-0.1427
	13.25	-0.0875	-0.098	-0.078	-0.0842	-0.0806	-0.1028	-0.1508	-0.1415	-0.1431
	132583	-0.0875	-0.098	-0.078	-0.084	-0.0803	-0.1026	-0.1522	-0.1435	-0.1431
	132667	-0.0875	-0.098	-0.0782	-0.084	-0.0803	-0.1029	-0.1539	-0.1453	-0.1437
	13275	-0.0875	-0.0979	-0.0779	-0.0838	-0.0803	-0.1029	-0.155	-0.1461	-0.1443
	132833	-0.0877	-0.0979	-0.0782	-0.0838	-0.0803	-0.1028	-0.1557	-0.1472	-0.145
	132917	-0.0877	-0.0979	-0.078	-0.084	-0.0802	-0.1028	-0.1571	-0.1478	-0.1461
	13.3	-0.0878	-0.0982	-0.0782	-0.0835	-0.0805	-0.1026	-0.158	-0.1485	-0.1467
	133083	-0.0883	-0.098	-0.0782	-0.0837	-0.0805	-0.1025	-0.1588	-0.1489	-0.1476
	133167	-0.0884	-0.0985	-0.078	-0.0835	-0.08	-0.1025	-0.1598	-0.1493	-0.1484
	13325	-0.0889	-0.0985	-0.078	-0.0837	-0.0802	-0.1023	-0.1606	-0.1499	-0.1493
	133333	-0.0892	-0.0985	-0.0782	-0.0835	-0.08	-0.1025	-0.1614	-0.1502	-0.1499
	133417	-0.0895	-0.0988	-0.0779	-0.0834	-0.08	-0.1023	-0.1623	-0.151	-0.1502
	13.35	-0.0901	-0.0991	-0.0782	-0.0832	-0.0797	-0.102	-0.1632	-0.1516	-0.1511
	133583	-0.0906	-0.0994	-0.0779	-0.0832	-0.0797	-0.1022	-0.164	-0.1522	-0.1514
	133667	-0.0913	-0.0996	-0.0779	-0.0834	-0.0797	-0.1022	-0.1649	-0.1527	-0.1522
	13375	-0.0918	-0.0999	-0.0779	-0.0832	-0.0796	-0.1019	-0.1655	-0.1534	-0.1528
	133833	-0.0924	-0.1002	-0.0779	-0.0831	-0.0797	-0.1022	-0.1664	-0.154	-0.1536
	133917	-0.093	-0.1009	-0.0779	-0.0828	-0.0796	-0.102	-0.1672	-0.1476	-0.1542
	13.4	-0.0942	-0.1014	-0.0777	-0.0828	-0.0796	-0.1019	-0.1681	-0.1485	-0.1548
	134083	-0.0951	-0.1023	-0.0777	-0.0826	-0.0796	-0.1012	-0.1696	-0.149	-0.1557
	134167	-0.0967	-0.1032	-0.0776	-0.0828	-0.0793	-0.1012	-0.1705	-0.1496	-0.1565
	13425	-0.0982	-0.1041	-0.0777	-0.0828	-0.0794	-0.1012	-0.1716	-0.1502	-0.1579
	134333	-0.1	-0.106	-0.0776	-0.0826	-0.0794	-0.1011	-0.1728	-0.1507	-0.1591
	134417	-0.1026	-0.1081	-0.0776	-0.0825	-0.0791	-0.1011	-0.1743	-0.1511	-0.1606
	13.45	-0.1058	-0.1107	-0.0774	-0.0825	-0.0793	-0.1012	-0.176	-0.1519	-0.1621
	134583	-0.1101	-0.1147	-0.0776	-0.0825	-0.0793	-0.1009	-0.1781	-0.1525	-0.164
	134667	-0.1157	-0.1199	-0.0774	-0.0823	-0.0793	-0.1011	-0.181	-0.1531	-0.1664
	13475	-0.1223	-0.1278	-0.0773	-0.0825	-0.0793	-0.1011	-0.1852	-0.1539	-0.169
	134833	-0.1301	-0.1403	-0.0776	-0.0823	-0.0791	-0.1008	-0.1894	-0.1548	-0.1724
	134917	-0.1398	-0.1575	-0.0774	-0.0819	-0.0793	-0.1009	-0.1946	-0.156	-0.176
	13.5	-0.1508	-0.1679	-0.0773	-0.0822	-0.0793	-0.1008	-0.1994	-0.1571	-0.1804
	135083	-0.1617	-0.1705	-0.0771	-0.082	-0.0791	-0.1009	-0.2024	-0.1582	-0.1841
	135167	-0.1662	-0.1701	-0.0774	-0.0822	-0.0793	-0.1009	-0.2035	-0.1597	-0.1875
	13525	-0.1666	-0.1693	-0.0773	-0.0817	-0.0788	-0.1006	-0.2035	-0.1617	-0.1905
	135333	-0.1664	-0.1684	-0.0771	-0.0819	-0.079	-0.1006	-0.2036	-0.164	-0.1919
	135417	-0.165	-0.1678	-0.0773	-0.0817	-0.079	-0.1008	-0.2032	-0.1667	-0.1923
	13.55	-0.1644	-0.167	-0.077	-0.0817	-0.0788	-0.1005	-0.2029	-0.1702	-0.1926
	135583	-0.1643	-0.1662	-0.0771	-0.0817	-0.079	-0.1008	-0.2026	-0.174	-0.1923
	135667	-0.1635	-0.1655	-0.0771	-0.0816	-0.0788	-0.1005	-0.202	-0.1789	-0.1922
	13575	-0.1629	0.0919	-0.0768	-0.0816	-0.0788	-0.1006	-0.2013	-0.1844	-0.1919
	135833	0.0745	0.1263	-0.0771	-0.0814	-0.0787	-0.1005	-0.2007	-0.189	-0.1914
	135917	0.1119	0.127	0.0167	0.0257	0.024	-0.1005	0.0727	-0.1926	-0.1908
	13.6	0.1112	0.1238	0.0518	0.0605	0.0571	-0.1006	0.1078	-0.1946	-0.1907
	136083	0.1075	0.1191	0.061	0.0684	0.0643	-0.1006	0.1122	-0.1952	0.0649
	136167	0.1035	0.1147	0.0663	0.0736	0.0689	-0.1005	0.1138	-0.1951	0.1
	13625	0.0996	0.1106	0.0703	0.0773	0.0718	0.0445	0.1167	-0.1948	0.1046
	136333	0.0965	0.1073	0.0724	0.08	0.0741	0.0793	0.1212	-0.194	0.1084
	136417	0.0941	0.1048	0.0744	0.082	0.0758	0.0869	0.1263	-0.1936	0.1112
	13.65	0.0922	0.1032	0.0756	0.0835	0.0768	0.0916	0.1324	-0.1931	0.1131
	136583	0.0909	0.1015	0.0765	0.0843	0.0776	0.0947	0.1435	-0.1926	0.1147
	136667	0.0896	0.1005	0.077	0.0849	0.0782	0.097	0.1533	-0.1922	0.116
	136667	0.0887	0.0999	0.0774	0.0854	0.0787	0.0983	0.164	0.0626	0.1179
	13675	0.0883	0.0988	0.0776	0.0861	0.0793	0.0994	0.1719	0.1081	0.1197
	136833	0.0881	0.0985	0.078	0.0861	0.0794	0.1	0.1757	0.1145	0.122
	136917	0.0877	0.098	0.0779	0.0866	0.0794	0.1006	0.1771	0.1182	0.1243
	13.7	0.0875	0.0976	0.078	0.0867	0.0796	0.1009	0.1763	0.12	0.1264
	137083	0.0871	0.0971	0.0784	0.0867	0.0796	0.1014	0.1766	0.122	0.1279
	137167	0.0869	0.097	0.0782	0.0869	0.0797	0.1015	0.1777	0.1238	0.1298
	13725	0.0869	0.0965	0.078	0.0869	0.0796	0.1015	0.1785	0.126	0.1308
	137333	0.0864	0.0967	0.0785	0.0869	0.0797	0.1015	0.1789	0.1278	0.1315
	137417	0.0867	0.0965	0.0785	0.0869	0.0797	0.1019	0.1797	0.1298	0.1322
	13.75	0.0864	0.0962	0.0785	0.0869	0.0796	0.1019	0.1804	0.1315	0.1325
	137583	0.0866	0.0964	0.0785	0.0869	0.0799	0.102	0.1814	0.1331	0.1328
	137667	0.0867	0.0962	0.0785	0.0869	0.0797	0.1019	0.1821	0.1347	0.133
	13775	0.0867	0.0962	0.0784	0.0869	0.0797	0.1019	0.1832	0.1357	0.1336
	137833	0.0871	0.0964	0.0784	0.0869	0.0796	0.1019	0.1839	0.1363	0.1339
	137917	0.0872	0.0962	0.0785	0.0871	0.0797	0.102	0.185	0.1371	0.1344
	13.8	0.0874	0.0967	0.0782	0.0869	0.0797	0.1019	0.1856	0.1377	0.1348
	138083	0.0878	0.0967	0.0784	0.0869	0.0797	0.102	0.1862	0.138	0.1353
	138167	0.088	0.097	0.0782	0.0869	0.0796	0.102	0.1867	0.1388	0.1357
	13825	0.088	0.0968	0.0784	0.0867	0.0796	0.1019	0.1875	0.1394	0.136
	138333	0.0886	0.0974	0.0782	0.0869	0.0797	0.1019	0.1884	0.1397	0.1366
	138417	0.089	0.0979	0.0782	0.0869	0.0796	0.1015	0.1888	0.14	0.1371
	13.85	0.0892	0.0979	0.0782	0.0867	0.0794	0.1015	0.1894	0.1408	0.1379
	138583	0.0896	0.0983	0.0782	0.0867	0.0796	0.1012	0.1901	0.1414	0.1386
	138667	0.0903	0.0988	0.0784	0.0869	0.0794	0.1017	0.1913	0.142	0.1391
	13875	0.0909	0.0994	0.0784	0.0869	0.0796	0.1017	0.1919	0.1426	0.1395
	138833	0.0915	0.1002	0.0782	0.0869	0.0796	0.1015	0.1931	0.1431	0.1402
	138917	0.0924	0.1009	0.0782	0.0867	0.0794	0.1017	0.1937	0.1438	0.1408
	13.9	0.093	0.1019	0.078	0.0866	0.0794	0.1014	0.1946	0.1446	0.1417
	139083	0.0942	0.1032	0.078	0.0864	0.0793	0.1012	0.1952	0.1449	0.1421
	139167	0.0956	0.1044	0.078	0.0867	0.0793	0.1012	0.1965	0.1453	0.1427
	13925	0.0968	0.1063	0.078	0.0866	0.0794	0.1011	0.1974	0.1461	0.1432
	139333	0.0988	0.1081	0.0777	0.0863	0.0793	0.1011	0.1986	0.1466	0.1441
	139417	0.1011	0.1109	0.0776	0.0864	0.0791	0.1011	0.2001	0.1473	0.1449
	13.95	0.104	0.1144	0.0777	0.0864	0.0791	0.1009	0.2013	0.1481	0.146
	139583	0.1073	0.1186	0.0777	0.0866	0.079	0.1009	0.2033	0.1484	0.1469
	139667	0.1118	0.125	0.0779	0.0864	0.0791	0.1011	0.2058	0.1492	0.1482
	13975	0.1171	0.1347	0.0774	0.086	0.0793	0.1011	0.2091	0.1501	0.1495
	139833	0.1241	0.1485	0.0776	0.0861	0.0788	0.1011	0.2137	0.1502	0.1511
	139917	0.1339	0.1659	0.0774	0.0861	0.079	0.1011	0.2187	0.1513	0.1527
	14	0.147	0.1734	0.0776	0.0861	0.0788	0.1011	0.2241	0.1519	0.1547
	140083	0.1604	0.1743	0.0773	0.0861	0.0791	0.1011	0.2276	0.1528	0.1569
	140167	0.1681	0.1739	0.0773	0.0861	0.079	0.1011	0.2291	0.154	0.1603
	14025	0.1688	0.173	0.0771	0.086	0.079	0.1006	0.2296	0.1551	0.1633
	140333	0.1682	0.1724	0.0773	0.086	0.0788	0.1008	0.2296	0.1563	0.1673
	140417	0.1667	0.171	0.0771	0.0858	0.0787	0.1008	0.2291	0.1582	0.1713
	14.05	0.1662	0.1707	0.077	0.0858	0.0788	0.1008	0.2285	0.16	0.1748
	140583	0.1652	0.1699	0.0771	0.0858	0.0787	0.1008	0.2284	0.1624	0.1778
	140667	0.1646	0.1696	0.077	0.0858	0.0787	0.1008	0.2277	0.1655	0.1798
	14075	0.1635	-0.0913	0.0768	0.0858	0.0788	0.1006	0.2273	0.1688	0.1809
	140833	-0.0788	-0.1263	0.0768	0.0857	0.0788	0.1008	0.2267	0.1733	0.1815
	140917	-0.1127	-0.126	-0.0169	-0.0297	-0.0245	0.1006	-0.0929	0.178	0.1817
	14.1	-0.1104	-0.1232	-0.0515	-0.062	-0.0573	0.1005	-0.1104	0.1824	0.181
	141083	-0.1063	-0.1199	-0.0597	-0.0687	-0.0642	0.1008	-0.1115	0.1858	-0.0622
	141167	-0.1026	-0.1162	-0.0654	-0.0723	-0.0684	0.1005	-0.1141	0.1879	-0.0999
	14125	-0.099	-0.113	-0.0694	-0.0753	-0.0715	-0.0446	-0.1156	0.189	-0.1052
	141333	-0.0964	-0.1102	-0.0718	-0.0773	-0.0736	-0.0796	-0.1156	0.1891	-0.1087
	141417	-0.0944	-0.108	-0.0736	-0.0791	-0.075	-0.0872	-0.1174	0.189	-0.1115
	14.15	-0.0922	-0.1061	-0.0745	-0.0799	-0.0758	-0.0918	-0.1211	0.1887	-0.1139
	141583	-0.091	-0.1048	-0.0756	-0.0809	-0.077	-0.0948	-0.1252	0.1882	-0.1164
	141667	-0.09	-0.1034	-0.0761	-0.0813	-0.0777	-0.0971	-0.1307	0.1879	-0.1192
	141667	-0.0895	-0.1023	-0.0762	-0.0817	-0.0779	-0.0979	-0.1366	-0.0674	-0.1231
	14175	-0.0892	-0.1015	-0.0767	-0.082	-0.0784	-0.0991	-0.1415	-0.1084	-0.1267
	141833	-0.0883	-0.1011	-0.0768	-0.0822	-0.0785	-0.0996	-0.1452	-0.1153	-0.1301
	141917	-0.0881	-0.1005	-0.0771	-0.0823	-0.0787	-0.1003	-0.1469	-0.1185	-0.1334
	14.2	-0.088	-0.1	-0.0771	-0.0823	-0.0787	-0.1005	-0.1485	-0.1211	-0.136
	142083	-0.0877	-0.0997	-0.0771	-0.0825	-0.079	-0.1008	-0.1499	-0.1235	-0.1374
	142167	-0.0875	-0.0993	-0.0773	-0.0823	-0.0791	-0.1006	-0.1495	-0.1258	-0.1391
	14225	-0.0874	-0.0988	-0.0773	-0.0825	-0.079	-0.1009	-0.1504	-0.1279	-0.1397
	142333	-0.0874	-0.0986	-0.0777	-0.0825	-0.079	-0.1011	-0.1511	-0.1313	-0.1405
	142417	-0.0871	-0.0986	-0.0776	-0.0823	-0.0791	-0.1011	-0.1519	-0.1344	-0.1408
	14.25	-0.0871	-0.0982	-0.0773	-0.0823	-0.0793	-0.1014	-0.153	-0.1369	-0.1415
	142583	-0.0871	-0.0982	-0.0774	-0.0823	-0.0793	-0.1009	-0.1537	-0.1391	-0.1418
	142667	-0.0869	-0.098	-0.0776	-0.0823	-0.0791	-0.1011	-0.1545	-0.1412	-0.1421
	14275	-0.0871	-0.098	-0.0773	-0.0825	-0.0791	-0.1012	-0.1556	-0.1423	-0.1427
	142833	-0.0871	-0.0982	-0.0774	-0.0823	-0.0791	-0.1011	-0.1563	-0.1429	-0.1437
	142917	-0.0871	-0.0983	-0.0774	-0.0822	-0.0788	-0.1011	-0.1574	-0.1434	-0.1443
	14.3	-0.0874	-0.0985	-0.0773	-0.0822	-0.0794	-0.1011	-0.1579	-0.1441	-0.1449
	143083	-0.0874	-0.0983	-0.0771	-0.0823	-0.079	-0.1012	-0.1586	-0.1444	-0.1458
	143167	-0.0875	-0.0983	-0.0771	-0.0823	-0.0788	-0.0993	-0.1597	-0.1449	-0.1466
	14325	-0.088	-0.0986	-0.0771	-0.0819	-0.079	-0.0991	-0.1604	-0.1452	-0.1472
	143333	-0.0883	-0.0986	-0.0774	-0.0822	-0.0788	-0.0991	-0.1612	-0.1456	-0.1479
	143417	-0.0886	-0.0991	-0.0771	-0.0819	-0.0788	-0.0991	-0.1624	-0.146	-0.1487
	14.35	-0.0889	-0.0993	-0.0773	-0.0819	-0.079	-0.0991	-0.1633	-0.1464	-0.1493
	143583	-0.0895	-0.0996	-0.0773	-0.0817	-0.0787	-0.0993	-0.1647	-0.147	-0.1496
	143667	-0.0898	-0.0997	-0.0773	-0.0819	-0.0785	-0.0979	-0.1656	-0.1476	-0.1504
	14375	-0.0904	-0.0999	-0.0771	-0.0816	-0.0785	-0.0979	-0.1666	-0.1484	-0.1507
	143833	-0.0913	-0.1005	-0.077	-0.0814	-0.0785	-0.0977	-0.1672	-0.149	-0.1518
	143917	-0.0919	-0.1009	-0.0771	-0.0814	-0.0785	-0.0977	-0.1681	-0.1495	-0.1525
	14.4	-0.0927	-0.1012	-0.0771	-0.0816	-0.0785	-0.0977	-0.1688	-0.1502	-0.1534
	144083	-0.0939	-0.102	-0.0771	-0.0813	-0.0785	-0.0977	-0.1699	-0.1478	-0.1542
	144167	-0.0951	-0.1029	-0.077	-0.0811	-0.0784	-0.0974	-0.1708	-0.1485	-0.155
	14425	-0.0967	-0.1037	-0.0771	-0.0811	-0.0785	-0.0974	-0.1719	-0.1489	-0.1562
	144333	-0.0986	-0.1054	-0.077	-0.0811	-0.0782	-0.0974	-0.1733	-0.1495	-0.1572
	144417	-0.1012	-0.1072	-0.0771	-0.0809	-0.0782	-0.0976	-0.1746	-0.1498	-0.1585
	14.45	-0.1043	-0.1096	-0.077	-0.0809	-0.078	-0.0974	-0.1765	-0.1505	-0.1603
	144583	-0.1081	-0.1128	-0.077	-0.0809	-0.078	-0.0973	-0.1785	-0.1511	-0.1621
	144667	-0.113	-0.1173	-0.0768	-0.0806	-0.078	-0.0974	-0.1814	-0.1519	-0.1643
	14475	-0.12	-0.124	-0.0767	-0.0806	-0.078	-0.0974	-0.1846	-0.1524	-0.1667
	144833	-0.1275	-0.1348	-0.0768	-0.0808	-0.0782	-0.0971	-0.1887	-0.1534	-0.1701
	144917	-0.1369	-0.1501	-0.0768	-0.0806	-0.0779	-0.0971	-0.1937	-0.1542	-0.1737
	14.5	-0.1476	-0.1643	-0.0765	-0.0805	-0.0779	-0.097	-0.1986	-0.1553	-0.1775
	145083	-0.1586	-0.1695	-0.0768	-0.0805	-0.0782	-0.097	-0.2016	-0.1565	-0.1817
	145167	-0.164	-0.1696	-0.0767	-0.0805	-0.078	-0.0971	-0.203	-0.1579	-0.1853
	14525	-0.1655	-0.1687	-0.0768	-0.0803	-0.078	-0.097	-0.2036	-0.1597	-0.1879
	145333	-0.165	-0.1678	-0.0765	-0.0803	-0.078	-0.0971	-0.2035	-0.1617	-0.1894
	145417	-0.1647	-0.167	-0.0767	-0.0802	-0.078	-0.097	-0.203	-0.164	-0.1902
	14.55	-0.164	-0.1662	-0.0765	-0.0802	-0.0779	-0.097	-0.2027	-0.1673	-0.1905
	145583	-0.163	-0.1656	-0.0765	-0.08	-0.0779	-0.0967	-0.2021	-0.1713	-0.1907
	145667	-0.1623	-0.1646	-0.0767	-0.08	-0.0779	-0.097	-0.2018	-0.1757	-0.1904
	14575	-0.1608	0.0916	-0.0765	-0.08	-0.0777	-0.0968	-0.201	-0.181	-0.1899
	145833	0.0729	0.1258	-0.0762	-0.0799	-0.0777	-0.097	-0.201	-0.1856	-0.1896
	145917	0.1106	0.127	0.0161	0.0248	0.0234	-0.097	0.0741	-0.1893	-0.189
	14.6	0.1109	0.1244	0.0515	0.059	0.0562	-0.0968	0.107	-0.1917	-0.1888
	146083	0.1078	0.1196	0.0602	0.0668	0.0632	-0.0968	0.1125	-0.1923	0.0658
	146167	0.1034	0.1151	0.0657	0.0719	0.0677	-0.0967	0.1145	-0.1925	0.1015
	14625	0.0993	0.1109	0.0694	0.0755	0.0707	0.0411	0.117	-0.1923	0.1061
	146333	0.0961	0.1077	0.0719	0.078	0.0727	0.0756	0.1194	-0.1919	0.109
	146417	0.0935	0.1052	0.0736	0.0799	0.0745	0.0831	0.1223	-0.1914	0.1116
	14.65	0.0915	0.1031	0.0753	0.0811	0.0758	0.088	0.1266	-0.1913	0.1136
	146583	0.0901	0.1015	0.0761	0.082	0.0764	0.0909	0.1354	-0.1905	0.115
	146667	0.089	0.1006	0.0765	0.0828	0.0773	0.093	0.1493	-0.1901	0.1167
	146667	0.0884	0.0997	0.0768	0.0834	0.0776	0.0947	0.1594	0.0628	0.1185
	14675	0.0877	0.099	0.0771	0.0837	0.0779	0.0954	0.1679	0.1067	0.1202
	146833	0.0874	0.0985	0.0773	0.0842	0.0782	0.0962	0.1749	0.1136	0.1215
	146917	0.0869	0.0979	0.0774	0.0843	0.0784	0.0968	0.1768	0.1177	0.1238
	14.7	0.0867	0.0973	0.0776	0.0843	0.0785	0.097	0.1783	0.1206	0.1252
	147083	0.0866	0.097	0.0774	0.0845	0.0784	0.0973	0.1792	0.1228	0.1269
	147167	0.0864	0.0968	0.0776	0.0846	0.0787	0.0976	0.1797	0.1244	0.1276
	14725	0.0863	0.0964	0.0777	0.0846	0.0787	0.0976	0.1804	0.126	0.1292
	147333	0.0864	0.0964	0.0776	0.0854	0.0785	0.0976	0.1814	0.1275	0.1298
	147417	0.0863	0.0964	0.0777	0.0854	0.0787	0.0977	0.1821	0.1293	0.1305
	14.75	0.0863	0.0962	0.0776	0.0854	0.0787	0.098	0.1827	0.1308	0.1313
	147583	0.0864	0.0962	0.0776	0.0852	0.0787	0.0979	0.1833	0.1324	0.1316
	147667	0.0864	0.0962	0.0777	0.0852	0.0787	0.0977	0.1841	0.1339	0.1322
	14775	0.0866	0.0962	0.0776	0.0854	0.0787	0.098	0.1847	0.135	0.1328
	147833	0.0869	0.0964	0.0777	0.0855	0.0785	0.0977	0.1853	0.1354	0.1331
	147917	0.0869	0.0965	0.0777	0.0854	0.0785	0.0979	0.1859	0.136	0.1336
	14.8	0.0867	0.0965	0.0779	0.0854	0.0787	0.098	0.1862	0.1365	0.1339
	148083	0.0874	0.0967	0.0776	0.0851	0.0785	0.0979	0.1872	0.1373	0.1345
	148167	0.0875	0.0968	0.078	0.0854	0.0787	0.0977	0.1875	0.1376	0.135
	14825	0.0877	0.097	0.0779	0.0852	0.0787	0.0976	0.1882	0.138	0.1354
	148333	0.0881	0.0974	0.0777	0.0854	0.0788	0.0979	0.189	0.1388	0.136
	148417	0.0883	0.0976	0.078	0.0854	0.0787	0.098	0.1891	0.1391	0.1362
	14.85	0.0889	0.0979	0.0779	0.0854	0.0787	0.0979	0.1901	0.1397	0.1368
	148583	0.089	0.0983	0.0779	0.0855	0.0785	0.098	0.1908	0.1398	0.1374
	148667	0.0896	0.099	0.0776	0.0854	0.0784	0.0977	0.1914	0.1406	0.1379
	14875	0.0901	0.0994	0.0776	0.0855	0.0785	0.0977	0.1922	0.1414	0.1385
	148833	0.0907	0.1	0.0777	0.0854	0.0784	0.0977	0.1926	0.1417	0.1389
	148917	0.0915	0.1009	0.0776	0.0854	0.0785	0.0976	0.1934	0.1421	0.1395
	14.9	0.0921	0.1019	0.0776	0.0855	0.0782	0.0977	0.194	0.1426	0.14
	149083	0.0935	0.1029	0.0773	0.0855	0.0782	0.0974	0.1949	0.1431	0.1405
	149167	0.0947	0.1041	0.0773	0.0854	0.0782	0.0977	0.196	0.1438	0.1412
	14925	0.0962	0.1058	0.0774	0.0852	0.0784	0.0977	0.1969	0.1446	0.1417
	149333	0.098	0.1077	0.0771	0.0854	0.0782	0.0976	0.1978	0.145	0.1423
	149417	0.1	0.1099	0.0773	0.0855	0.0784	0.0976	0.1995	0.1455	0.1431
	14.95	0.1028	0.1131	0.0771	0.0855	0.078	0.0977	0.2007	0.1461	0.1441
	149583	0.106	0.1171	0.0773	0.0855	0.0782	0.0973	0.2027	0.1469	0.1453
	149667	0.1098	0.1226	0.077	0.0855	0.078	0.0973	0.205	0.1476	0.1463
	14975	0.1144	0.1313	0.0771	0.0852	0.0779	0.0974	0.2087	0.1484	0.1476
	149833	0.1205	0.1447	0.0768	0.0852	0.0779	0.0974	0.2126	0.1489	0.149
	149917	0.1293	0.1621	0.077	0.0854	0.0779	0.0974	0.2177	0.1496	0.1505
	15	0.1412	0.1724	0.0768	0.0854	0.0777	0.0974	0.2227	0.1505	0.1527
	150083	0.1562	0.1739	0.0768	0.0852	0.0779	0.0974	0.2264	0.1514	0.155
	150167	0.1647	0.1733	0.0768	0.0855	0.0777	0.0974	0.2284	0.1525	0.158
	15025	0.1662	0.1727	0.0768	0.0854	0.0779	0.0973	0.2287	0.1537	0.1614
	150333	0.1661	0.1716	0.0767	0.0852	0.0777	0.0974	0.2285	0.155	0.1656
	150417	0.1652	0.1711	0.0767	0.0852	0.0777	0.0973	0.2285	0.1565	0.1695
	15.05	0.1641	0.1707	0.0767	0.0851	0.0777	0.0971	0.228	0.1588	0.1733
	150583	0.163	0.1698	0.0765	0.0852	0.0777	0.0971	0.2276	0.1609	0.176
	150667	0.1627	0.169	0.0765	0.0849	0.0777	0.0973	0.227	0.164	0.1777
	15075	0.1615	-0.0922	0.0765	0.0849	0.0777	0.0971	0.2265	0.1675	0.1788
	150833	-0.0774	-0.1255	0.0767	0.0851	0.0776	0.0971	0.2259	0.1716	0.1792
	150917	-0.1118	-0.1257	-0.0167	-0.0294	-0.024	0.097	-0.0933	0.1763	0.1794
	15.1	-0.1101	-0.1231	-0.051	-0.0611	-0.0561	0.0971	-0.1093	0.1803	0.1789
	151083	-0.1061	-0.12	-0.0591	-0.0681	-0.0629	0.0971	-0.1131	0.1835	-0.0636
	151167	-0.102	-0.1165	-0.0646	-0.0726	-0.0672	0.0971	-0.1127	0.1853	-0.1006
	15125	-0.0985	-0.1135	-0.0684	-0.0756	-0.0704	-0.0414	-0.1145	0.1859	-0.1054
	151333	-0.0956	-0.1106	-0.0706	-0.0774	-0.0724	-0.0758	-0.1167	0.1859	-0.1084
	151417	-0.093	-0.1084	-0.0727	-0.0791	-0.0738	-0.0834	-0.118	0.1859	-0.1116
	15.15	-0.0916	-0.1064	-0.0736	-0.0802	-0.0752	-0.088	-0.1212	0.1858	-0.1139
	151583	-0.0904	-0.1052	-0.0744	-0.0808	-0.0761	-0.091	-0.1252	0.1856	-0.1164
	151667	-0.0892	-0.104	-0.0753	-0.0814	-0.0765	-0.0932	-0.1296	0.185	-0.1182
	151667	-0.0886	-0.1031	-0.0755	-0.0817	-0.077	-0.0942	-0.1331	-0.0671	-0.1208
	15175	-0.088	-0.1023	-0.0759	-0.0819	-0.0773	-0.0951	-0.1366	-0.1075	-0.1232
	151833	-0.0877	-0.1014	-0.0762	-0.0825	-0.0776	-0.0961	-0.1394	-0.1144	-0.1272
	151917	-0.0872	-0.1011	-0.0764	-0.0823	-0.0777	-0.0965	-0.1421	-0.1179	-0.1305
	15.2	-0.0874	-0.1005	-0.0764	-0.0823	-0.0779	-0.0968	-0.1441	-0.1208	-0.1339
	152083	-0.0867	-0.1003	-0.0765	-0.0825	-0.0779	-0.0971	-0.1463	-0.1232	-0.1363
	152167	-0.0866	-0.0999	-0.0767	-0.0822	-0.078	-0.0971	-0.1479	-0.1257	-0.1374
	15225	-0.0864	-0.0996	-0.0765	-0.0823	-0.0779	-0.0973	-0.1493	-0.1286	-0.1382
	152333	-0.0866	-0.0994	-0.0767	-0.0825	-0.0779	-0.0974	-0.1504	-0.1313	-0.1389
	152417	-0.0864	-0.0993	-0.0765	-0.0822	-0.078	-0.0973	-0.1513	-0.1342	-0.1394
	15.25	-0.0864	-0.0993	-0.0765	-0.082	-0.0782	-0.0973	-0.1524	-0.1362	-0.1398
	152583	-0.0864	-0.0988	-0.0765	-0.0822	-0.0779	-0.0974	-0.153	-0.1383	-0.1408
	152667	-0.0866	-0.0988	-0.0765	-0.0819	-0.078	-0.0974	-0.154	-0.1397	-0.1414
	15275	-0.0866	-0.0988	-0.0767	-0.0819	-0.0782	-0.0974	-0.1547	-0.1408	-0.1418
	152833	-0.0867	-0.0991	-0.0767	-0.082	-0.078	-0.0973	-0.1554	-0.1417	-0.1424
	152917	-0.0867	-0.0991	-0.0767	-0.0819	-0.0779	-0.0974	-0.1565	-0.1423	-0.1429
	15.3	-0.0869	-0.0991	-0.0767	-0.0819	-0.0782	-0.0973	-0.1572	-0.1429	-0.1435
	153083	-0.0871	-0.0993	-0.0765	-0.0819	-0.078	-0.0973	-0.1577	-0.1431	-0.144
	153167	-0.0872	-0.0994	-0.0767	-0.0816	-0.0782	-0.0974	-0.1586	-0.1432	-0.1447
	15325	-0.0875	-0.0993	-0.0767	-0.0816	-0.078	-0.0973	-0.1591	-0.1437	-0.1453
	153333	-0.0878	-0.0996	-0.0767	-0.0816	-0.078	-0.0973	-0.1598	-0.1441	-0.146
	153417	-0.088	-0.0996	-0.0767	-0.0813	-0.078	-0.0971	-0.1603	-0.1444	-0.1466
	15.35	-0.0881	-0.0996	-0.0764	-0.0816	-0.078	-0.0971	-0.1609	-0.145	-0.1472
	153583	-0.0884	-0.1	-0.0767	-0.0814	-0.078	-0.0973	-0.1615	-0.1453	-0.1473
	153667	-0.0893	-0.1003	-0.0767	-0.0814	-0.078	-0.0973	-0.162	-0.146	-0.1481
	15375	-0.0895	-0.1006	-0.0764	-0.0813	-0.0777	-0.0973	-0.1627	-0.1463	-0.1489
	153833	-0.0903	-0.1008	-0.0765	-0.0813	-0.078	-0.0971	-0.1637	-0.147	-0.1495
	153917	-0.091	-0.1011	-0.0765	-0.0811	-0.0777	-0.0971	-0.1643	-0.1478	-0.1501
	15.4	-0.0919	-0.1017	-0.0764	-0.0811	-0.0777	-0.0971	-0.1649	-0.1482	-0.1507
	154083	-0.0927	-0.1025	-0.0764	-0.0808	-0.078	-0.097	-0.1658	-0.1489	-0.1514
	154167	-0.0938	-0.1032	-0.0764	-0.0808	-0.0777	-0.097	-0.167	-0.1492	-0.1524
	15425	-0.0954	-0.1043	-0.0767	-0.0808	-0.0779	-0.097	-0.1679	-0.1496	-0.1533
	154333	-0.0973	-0.1057	-0.0765	-0.0808	-0.0776	-0.0971	-0.1691	-0.1501	-0.1547
	154417	-0.0994	-0.1073	-0.0765	-0.0806	-0.0779	-0.097	-0.1704	-0.1507	-0.1562
	15.45	-0.1022	-0.1096	-0.0765	-0.0808	-0.0777	-0.097	-0.1717	-0.1516	-0.1575
	154583	-0.1052	-0.1124	-0.0764	-0.0806	-0.0777	-0.097	-0.1742	-0.1522	-0.1591
	154667	-0.1095	-0.1168	-0.0765	-0.0805	-0.0776	-0.097	-0.1766	-0.1528	-0.1612
	15475	-0.1151	-0.1228	-0.0764	-0.0808	-0.0774	-0.0968	-0.18	-0.1533	-0.1638
	154833	-0.1225	-0.1319	-0.0764	-0.0805	-0.0774	-0.0968	-0.1841	-0.1539	-0.1669
	154917	-0.1307	-0.1455	-0.0762	-0.0806	-0.0774	-0.0968	-0.1893	-0.1551	-0.1705
	15.5	-0.1411	-0.1592	-0.0762	-0.0805	-0.0774	-0.0967	-0.1942	-0.156	-0.1743
	155083	-0.1524	-0.1656	-0.0764	-0.0803	-0.0773	-0.0967	-0.1977	-0.1572	-0.1783
	155167	-0.1595	-0.1672	-0.0762	-0.0802	-0.0771	-0.0965	-0.1994	-0.1586	-0.1818
	15525	-0.1624	-0.1676	-0.0762	-0.0803	-0.0771	-0.0967	-0.1998	-0.1601	-0.1849
	155333	-0.1629	-0.1673	-0.0764	-0.08	-0.0773	-0.0967	-0.2	-0.1624	-0.1864
	155417	-0.1629	-0.1664	-0.0762	-0.08	-0.0773	-0.0965	-0.1997	-0.165	-0.1873
	15.55	-0.162	-0.1656	-0.0762	-0.0799	-0.077	-0.0965	-0.1995	-0.1681	-0.1876
	155583	-0.1614	-0.1647	-0.0762	-0.08	-0.0771	-0.0965	-0.1991	-0.1717	-0.1875
	155667	-0.1606	-0.1643	-0.0764	-0.08	-0.0771	-0.0964	-0.1989	-0.1765	-0.1872
	15575	-0.16	0.0913	-0.0761	-0.0799	-0.0768	-0.0964	-0.1984	-0.1818	-0.187
	155833	0.0727	0.1252	-0.0761	-0.0799	-0.077	-0.0964	-0.198	-0.1864	-0.1864
	155917	0.1095	0.1275	0.0158	0.0257	0.0225	-0.0964	0.0735	-0.1897	-0.1861
	15.6	0.1099	0.1247	0.0512	0.059	0.055	-0.0965	0.1061	-0.1919	-0.1856
	156083	0.1066	0.1205	0.0599	0.0665	0.0619	-0.0964	0.1109	-0.1925	0.0652
	156167	0.1023	0.1157	0.0652	0.0719	0.0666	-0.0962	0.1139	-0.1926	0.1002
	15625	0.0986	0.1119	0.069	0.0753	0.0695	0.0407	0.116	-0.1922	0.1051
	156333	0.0953	0.1086	0.0716	0.0779	0.0718	0.075	0.1188	-0.1919	0.1081
	156417	0.0925	0.1063	0.0733	0.0796	0.0733	0.0828	0.122	-0.1916	0.1109
	15.65	0.0909	0.1043	0.0744	0.0813	0.0745	0.0872	0.1275	-0.191	0.1122
	156583	0.0893	0.1028	0.0753	0.0822	0.0755	0.0901	0.1334	-0.1904	0.113
	156667	0.0883	0.1015	0.0758	0.0829	0.0761	0.0921	0.1412	-0.1899	0.115
	156667	0.0878	0.1006	0.0765	0.0837	0.0764	0.0939	0.1518	0.0654	0.1165
	15675	0.0872	0.0999	0.0765	0.0837	0.0771	0.0948	0.1611	0.1089	0.1191
	156833	0.0864	0.0994	0.0768	0.0842	0.0773	0.0954	0.1687	0.1159	0.1212
	156917	0.0863	0.0988	0.0768	0.0845	0.0773	0.0961	0.1734	0.1194	0.1228
	15.7	0.0863	0.0985	0.077	0.0845	0.0776	0.0962	0.1749	0.1225	0.1246
	157083	0.086	0.0982	0.077	0.0845	0.0776	0.0967	0.176	0.1247	0.1261
	157167	0.0858	0.0979	0.0771	0.0846	0.0777	0.0968	0.1769	0.1269	0.1273
	15725	0.0857	0.0976	0.0768	0.0845	0.078	0.097	0.1777	0.1283	0.1284
	157333	0.0858	0.0974	0.0774	0.0848	0.0777	0.0968	0.1785	0.1301	0.1292
	157417	0.0858	0.0971	0.077	0.0846	0.0777	0.0971	0.1791	0.1318	0.1299
	15.75	0.0857	0.0973	0.0771	0.0845	0.0779	0.097	0.1797	0.1328	0.1305
	157583	0.0857	0.0973	0.0771	0.0846	0.0777	0.097	0.1807	0.1344	0.1312
	157667	0.0858	0.0971	0.0771	0.0848	0.0777	0.0973	0.1814	0.1359	0.1315
	15775	0.0858	0.0971	0.077	0.0846	0.0779	0.0971	0.182	0.1369	0.1318
	157833	0.086	0.0971	0.0771	0.0846	0.0777	0.097	0.1826	0.1377	0.1316
	157917	0.0861	0.0971	0.0771	0.0846	0.0779	0.0971	0.1833	0.1383	0.1319
	15.8	0.0863	0.0971	0.0771	0.0848	0.0777	0.0971	0.1838	0.1386	0.1322
	158083	0.0866	0.097	0.077	0.0846	0.0779	0.0971	0.1844	0.1389	0.1327
	158167	0.0869	0.0971	0.077	0.0846	0.0777	0.0971	0.1852	0.1392	0.1333
	15825	0.0871	0.0976	0.0771	0.0846	0.0777	0.0971	0.1858	0.1394	0.1336
	158333	0.0869	0.0977	0.077	0.0845	0.0777	0.0971	0.1862	0.1395	0.1344
	158417	0.0874	0.0977	0.077	0.0846	0.0777	0.097	0.1872	0.14	0.1347
	15.85	0.0878	0.0982	0.0771	0.0846	0.0777	0.097	0.1876	0.1403	0.1351
	158583	0.0883	0.0986	0.0771	0.0846	0.0779	0.097	0.1884	0.1411	0.1356
	158667	0.0886	0.099	0.077	0.0848	0.0776	0.097	0.1888	0.1414	0.1362
	15875	0.0887	0.0993	0.077	0.0845	0.0777	0.0968	0.1894	0.1418	0.1368
	158833	0.0893	0.0999	0.077	0.0845	0.0776	0.0968	0.1904	0.1424	0.1373
	158917	0.0901	0.1005	0.0771	0.0846	0.0776	0.0968	0.191	0.1429	0.1377
	15.9	0.0909	0.1009	0.077	0.0845	0.0776	0.097	0.1917	0.1432	0.1383
	159083	0.0916	0.1022	0.077	0.0845	0.0776	0.0967	0.1928	0.1441	0.1388
	159167	0.0925	0.1032	0.077	0.0845	0.0776	0.0968	0.1939	0.1444	0.1395
	15925	0.0938	0.1041	0.077	0.0845	0.0776	0.0967	0.1949	0.1449	0.14
	159333	0.0953	0.1058	0.0768	0.0843	0.0774	0.0968	0.1962	0.1455	0.1408
	159417	0.0971	0.1077	0.0768	0.0843	0.0773	0.097	0.1971	0.146	0.1415
	15.95	0.0991	0.1101	0.077	0.0845	0.0776	0.0968	0.1983	0.1467	0.1426
	159583	0.1019	0.1133	0.0767	0.0843	0.0773	0.0967	0.2001	0.1473	0.1437
	159667	0.1054	0.1177	0.0767	0.0843	0.0773	0.0968	0.2026	0.1479	0.1449
	15975	0.1093	0.1235	0.0767	0.0843	0.0773	0.0968	0.2053	0.1485	0.146
	159833	0.1145	0.1324	0.0767	0.0843	0.0773	0.0967	0.2093	0.1493	0.1472
	159917	0.1212	0.1466	0.0767	0.0843	0.0773	0.0968	0.2143	0.1501	0.149
	16	0.1302	0.1635	0.0767	0.0843	0.077	0.0967	0.2195	0.151	0.151
	160083	0.1438	0.1708	0.0765	0.0842	0.0771	0.0967	0.2236	0.1519	0.1533
	160167	0.1571	0.1722	0.0762	0.084	0.0771	0.097	0.2259	0.1527	0.1559
	16025	0.1618	0.1719	0.0764	0.0843	0.0771	0.0964	0.227	0.154	0.1595
	160333	0.1629	0.171	0.0764	0.0843	0.077	0.0967	0.2271	0.1553	0.1632
	160417	0.1623	0.1705	0.0764	0.0842	0.077	0.0965	0.2267	0.1568	0.167
	16.05	0.1617	0.1698	0.0762	0.0842	0.077	0.0965	0.2262	0.1589	0.1708
	160583	0.1609	0.1693	0.0762	0.0838	0.0771	0.0964	0.2259	0.1611	0.1737
	160667	0.1603	0.1684	0.0762	0.084	0.077	0.0964	0.2251	0.164	0.1757
	16075	0.1592	-0.0925	0.0762	0.084	0.0773	0.0964	0.2248	0.1676	0.1766
	160833	-0.0753	-0.1269	0.0761	0.0837	0.077	0.0964	0.2242	0.1716	0.1769
	160917	-0.1107	-0.125	-0.0156	-0.0292	-0.0228	0.0964	-0.0944	0.1759	0.1768
	16.1	-0.1095	-0.1226	-0.0498	-0.06	-0.0552	0.0964	-0.1119	0.1801	0.1769
	161083	-0.1055	-0.1191	-0.0585	-0.0669	-0.0622	0.0964	-0.111	0.1829	-0.064
	161167	-0.1014	-0.1156	-0.0637	-0.0715	-0.0665	0.0964	-0.1125	0.1844	-0.0993
	16125	-0.0979	-0.1128	-0.0675	-0.0745	-0.0694	-0.0411	-0.1136	0.1852	-0.1052
	161333	-0.095	-0.1101	-0.07	-0.0767	-0.0716	-0.075	-0.116	0.1853	-0.1089
	161417	-0.0927	-0.108	-0.0715	-0.0784	-0.073	-0.0822	-0.1186	0.1853	-0.1119
	16.15	-0.091	-0.1063	-0.073	-0.0793	-0.0745	-0.0869	-0.1225	0.185	-0.1136
	161583	-0.0895	-0.1046	-0.0738	-0.0803	-0.0752	-0.0898	-0.1243	0.1847	-0.1157
	161667	-0.089	-0.1035	-0.0744	-0.0806	-0.0756	-0.0919	-0.129	0.1843	-0.1174
	161667	-0.0883	-0.1028	-0.0747	-0.0808	-0.0759	-0.093	-0.1325	-0.0692	-0.1202
	16175	-0.0875	-0.1019	-0.0753	-0.0811	-0.0764	-0.0941	-0.1359	-0.1095	-0.1237
	161833	-0.0871	-0.1012	-0.0756	-0.0814	-0.0765	-0.0947	-0.1392	-0.1153	-0.1267
	161917	-0.0867	-0.1009	-0.0756	-0.0811	-0.0768	-0.0953	-0.1417	-0.1188	-0.1298
	16.2	-0.0864	-0.1002	-0.0758	-0.0816	-0.0771	-0.0958	-0.1443	-0.1221	-0.1322
	162083	-0.0864	-0.0999	-0.0758	-0.0816	-0.0768	-0.0961	-0.1461	-0.1249	-0.1344
	162167	-0.0861	-0.0996	-0.0759	-0.0816	-0.0771	-0.0962	-0.1472	-0.1273	-0.1359
	16225	-0.086	-0.0996	-0.0761	-0.0817	-0.0771	-0.0962	-0.1479	-0.1298	-0.1373
	162333	-0.0858	-0.0993	-0.0761	-0.0814	-0.0773	-0.0964	-0.1492	-0.1319	-0.1382
	162417	-0.086	-0.099	-0.0761	-0.0816	-0.0771	-0.0964	-0.1496	-0.1342	-0.1392
	16.25	-0.0855	-0.099	-0.0761	-0.0814	-0.0773	-0.0962	-0.1504	-0.1365	-0.14
	162583	-0.0857	-0.0988	-0.0761	-0.0814	-0.0773	-0.0964	-0.1511	-0.1385	-0.1403
	162667	-0.0857	-0.0988	-0.0761	-0.0814	-0.0774	-0.0964	-0.1522	-0.1395	-0.1408
	16275	-0.0858	-0.0988	-0.0761	-0.0814	-0.0771	-0.0964	-0.153	-0.1409	-0.1411
	162833	-0.0858	-0.0985	-0.0759	-0.0813	-0.0773	-0.0962	-0.1539	-0.1417	-0.1415
	162917	-0.0858	-0.0986	-0.0761	-0.0813	-0.0773	-0.0962	-0.1545	-0.1424	-0.1421
	16.3	-0.086	-0.0985	-0.0761	-0.0811	-0.0774	-0.0964	-0.1553	-0.1431	-0.1426
	163083	-0.0861	-0.099	-0.0759	-0.0811	-0.0771	-0.0962	-0.1559	-0.1434	-0.1434
	163167	-0.0863	-0.099	-0.0759	-0.0813	-0.0773	-0.0964	-0.1565	-0.1437	-0.144
	16325	-0.0864	-0.0991	-0.0761	-0.0811	-0.0774	-0.0965	-0.1569	-0.1438	-0.1447
	163333	-0.0864	-0.0991	-0.0761	-0.0811	-0.0773	-0.0962	-0.1577	-0.1427	-0.1452
	163417	-0.0867	-0.0994	-0.0761	-0.0811	-0.0771	-0.0964	-0.1583	-0.1429	-0.146
[truncated: 54,437 more rows]

## Sheet: Li||Li 2.0 mA cm-2
Name	Time	Voltage	Voltage	Voltage	Voltage	Voltage
Unit	[h]	[V]	[V]	[V]	[V]	[V]
Comment		BM-LiLirp-17	BM-LiN-29	BM-LiN-30	BM-LZLN-14	BM-LZLN-13
	0	-0.0129	-0.0045	0.019	-0.0043	-0.0042
	0.0167	-0.0048	-0.0037	0.0182	-0.0021	0.0045
	0.0333	-0.0025	-0.0036	0.0175	-0.0022	0.0056
	0.05	-0.0016	-0.0034	0.0166	-0.0021	0.0053
	0.0667	-0.0011	-0.0034	0.0163	-0.0022	0.0051
	0.0833	-0.0008	-0.0037	0.0156	-0.0019	0.0047
	0.1	-0.0004	-0.0034	0.0149	-0.0022	0.0045
	0.1167	-0.0002	-0.0034	0.0141	-0.0022	0.0042
	0.1333	0.0002	-0.0036	0.0137	-0.0021	0.0039
	0.15	-0.0001	-0.0036	0.013	-0.0021	0.0036
	0.1667	0.0001	-0.0036	0.0124	-0.0021	0.0034
	0.1667	-0.7255	-0.9417	-0.8911	-0.0393	-0.642
	0.169	-0.6793	-0.8793	-0.9603	-0.7345	-0.5917
	0.1714	-0.6483	-0.8215	-0.8984	-0.6829	-0.5412
	0.1772	-0.626	-0.7675	-0.841	-0.6321	-0.491
	0.1855	-0.6083	-0.7154	-0.7862	-0.5813	-0.458
	0.1938	-0.5933	-0.6643	-0.7339	-0.5311	-0.4405
	0.2022	-0.5813	-0.6139	-0.6826	-0.4868	-0.4293
	0.2105	-0.5703	-0.5637	-0.6323	-0.4656	-0.4215
	0.2188	-0.5607	-0.5406	-0.5821	-0.4527	-0.4147
	0.2272	-0.5521	-0.5308	-0.5685	-0.4435	-0.4093
	0.2355	-0.5444	-0.5262	-0.5625	-0.4366	-0.4041
	0.2438	-0.537	-0.523	-0.559	-0.4305	-0.3994
	0.2522	-0.5306	-0.521	-0.5564	-0.4253	-0.3951
	0.2605	-0.5251	-0.5198	-0.5541	-0.4206	-0.3907
	0.2688	-0.5203	-0.5184	-0.5521	-0.416	-0.3869
	0.2772	-0.516	-0.5172	-0.5506	-0.4121	-0.3832
	0.2855	-0.512	-0.516	-0.5488	-0.4079	-0.3796
	0.2938	-0.5085	-0.5149	-0.5474	-0.4043	-0.3759
	0.3022	-0.5051	-0.5137	-0.5453	-0.4011	-0.3722
	0.3105	-0.5021	-0.5123	-0.5441	-0.398	-0.3687
	0.3188	-0.4998	-0.5111	-0.5425	-0.3951	-0.3655
	0.3272	-0.4974	-0.5096	-0.5413	-0.3924	-0.362
	0.3355	-0.4951	-0.508	-0.5399	-0.3895	-0.3585
	0.3438	-0.4931	-0.5065	-0.5387	-0.3869	-0.3555
	0.3522	-0.4916	-0.5048	-0.5375	-0.3845	-0.3524
	0.3605	-0.4903	-0.5035	-0.5364	-0.382	-0.3492
	0.3688	-0.489	-0.5019	-0.5351	-0.3799	-0.3462
	0.3772	-0.4876	-0.5004	-0.5337	-0.3774	-0.3436
	0.3855	-0.4868	-0.4987	-0.5319	-0.3754	-0.3404
	0.3938	-0.4864	-0.4966	-0.5305	-0.3732	-0.3376
	0.4022	-0.4855	-0.4951	-0.5285	-0.371	-0.3352
	0.4105	0.2631	-0.4937	-0.5271	-0.3693	-0.3321
	0.4167	0.2746	-0.492	-0.525	-0.3669	-0.3307
	0.4167	0.2711	-0.4894	-0.5233	-0.3651	0.1174
	0.4177	0.2981	-0.4876	-0.5212	-0.3628	0.1676
	0.4261	0.3484	-0.4853	-0.519	-0.3626	0.1759
	0.4344	0.3993	-0.4836	-0.5164	0.1502	0.1785
	0.4427	0.4513	0.2378	-0.5145	0.2004	0.1872
	0.4511	0.5033	0.2905	0.2335	0.2074	0.2047
	0.4594	0.5538	0.2396	0.2905	0.2184	0.2465
	0.4646	0.5494	0.1896	0.2399	0.2573	0.2967
	0.4675	0.5351	0.1792	0.1897	0.3075	0.3475
	0.4697	0.5192	0.1867	0.1786	0.3446	0.398
	0.4745	0.5048	0.2161	0.1916	0.3887	0.4482
	0.4829	0.4937	0.2662	0.2418	0.4389	0.4401
	0.4912	0.4817	0.3169	0.2924	0.4688	0.4199
	0.4995	0.4737	0.3674	0.3436	0.4438	0.4061
	0.5079	0.4702	0.4185	0.3957	0.4289	0.395
	0.5162	0.4652	0.4699	0.4488	0.4191	0.3849
	0.5245	0.4574	0.5212	0.5019	0.4115	0.3767
	0.5329	0.4511	0.5721	0.4748	0.4052	0.3692
	0.5412	0.4449	0.6231	0.4527	0.3991	0.3622
	0.5495	0.4388	0.5996	0.4401	0.3935	0.3558
	0.5579	0.433	0.5827	0.4314	0.3881	0.3495
	0.5662	0.4272	0.5732	0.424	0.3817	0.3442
	0.5745	0.4215	0.566	0.4177	0.3751	0.3388
	0.5829	0.4162	0.5598	0.4116	0.3703	0.3342
	0.5912	0.411	0.5558	0.4064	0.3646	0.3298
	0.5995	0.4061	0.5505	0.4018	0.3599	0.3252
	0.6079	0.4015	0.545	0.3971	0.3544	0.321
	0.6162	0.3968	0.5413	0.3928	0.3501	0.3169
	0.6245	0.3931	0.536	0.3889	0.3463	0.3135
	0.6329	0.389	0.5331	0.3851	0.3431	0.3098
	0.6412	0.3851	0.5282	0.3816	0.3387	0.3068
	0.6495	0.3816	0.5325	0.3782	0.3358	0.304
	0.6579	0.3791	0.5319	0.3751	0.3332	0.3011
	0.6662	-0.2032	0.5305	0.3724	0.3303	0.2985
	0.6667	-0.193	0.5279	0.3698	0.3274	0.2984
	0.6667	-0.1951	0.5248	0.3672	0.3265	-0.095
	0.6683	-0.2053	0.5236	0.3652	-0.1176	-0.145
	0.6766	-0.2209	0.5206	0.3629	-0.1614	-0.149
	0.6849	-0.2712	0.512	0.3611	-0.1626	-0.1528
	0.6933	-0.2903	0.5096	0.3591	-0.169	-0.1601
	0.7016	-0.3004	0.5074	0.3576	-0.1823	-0.1717
	0.7099	-0.305	0.5059	0.3558	-0.2	-0.1888
	0.7183	-0.3079	0.5039	0.3555	-0.2181	-0.2029
	0.7266	-0.3117	-0.2358	-0.1833	-0.232	-0.2152
	0.7349	-0.3188	-0.1853	-0.1539	-0.2418	-0.2271
	0.7433	-0.3313	-0.1525	-0.1463	-0.2503	-0.2364
	0.7516	-0.3454	-0.149	-0.1463	-0.2598	-0.2447
	0.7599	-0.3555	-0.1519	-0.1528	-0.2705	-0.2526
	0.7683	-0.3616	-0.162	-0.1701	-0.2851	-0.2612
	0.7766	-0.3635	-0.1778	-0.1884	-0.3025	-0.2708
	0.7849	-0.3613	-0.1897	-0.2003	-0.3194	-0.2819
	0.7933	-0.3581	-0.1966	-0.2078	-0.3327	-0.2956
	0.8016	-0.3541	-0.2027	-0.2158	-0.3413	-0.3072
	0.8099	-0.35	-0.2125	-0.2282	-0.3468	-0.3152
	0.8183	-0.3454	-0.2265	-0.2456	-0.3474	-0.3194
	0.8266	-0.3419	-0.2477	-0.2753	-0.3446	-0.3188
	0.8349	-0.3384	-0.2778	-0.3251	-0.3405	-0.315
	0.8433	-0.3344	-0.3213	-0.368	-0.3361	-0.3101
	0.8516	-0.331	-0.3635	-0.3793	-0.3313	-0.3054
	0.8599	-0.328	-0.3805	-0.3817	-0.3271	-0.301
	0.8683	-0.3251	-0.384	-0.3811	-0.3234	-0.2967
	0.8766	-0.3223	-0.3834	-0.3794	-0.3199	-0.293
	0.8849	-0.3201	-0.3805	-0.3773	-0.3165	-0.2894
	0.8933	-0.3176	-0.3783	-0.3747	-0.3136	-0.286
	0.9016	-0.3175	-0.3762	-0.3721	-0.3106	-0.2828
	0.9099	0.185	-0.3739	-0.3693	-0.308	-0.2799
	0.9167	0.2015	-0.3715	-0.3663	-0.3057	-0.2779
	0.9167	0.2113	-0.3689	-0.3635	0.1038	0.0826
	0.9188	0.2256	-0.3666	-0.3605	0.1542	0.1328
	0.9271	0.2758	-0.3643	-0.3577	0.1632	0.1417
	0.9355	0.2877	-0.3617	-0.3552	0.1679	0.1472
	0.9438	0.2866	-0.3596	-0.3526	0.1763	0.1565
	0.9521	0.2839	-0.3571	-0.3504	0.193	0.1725
	0.9605	0.2827	-0.3555	-0.3477	0.2137	0.1978
	0.9688	0.2828	-0.3542	0.1908	0.2345	0.2108
	0.9771	0.2865	0.1978	0.1557	0.2471	0.2204
	0.9855	0.295	0.1572	0.1485	0.2561	0.2285
	0.9938	0.3104	0.1493	0.1505	0.2659	0.2352
	10021	0.3291	0.1548	0.1563	0.2767	0.2418
	10105	0.344	0.1752	0.1595	0.2897	0.2493
	10188	0.3529	0.2256	0.1595	0.3036	0.2583
	10271	0.3561	0.2723	0.1594	0.3153	0.2688
	10355	0.3579	0.2862	0.1598	0.3242	0.2792
	10438	0.3581	0.2932	0.1617	0.3295	0.2894
	10521	0.3571	0.2996	0.1646	0.3333	0.2995
	10605	0.3556	0.305	0.1691	0.3346	0.3068
	10688	0.3542	0.3109	0.1762	0.3329	0.3101
	10771	0.3523	0.3188	0.1879	0.3298	0.3106
	10855	0.3504	0.3313	0.209	0.3265	0.3083
	10938	0.3487	0.3577	0.2493	0.3228	0.3042
	11021	0.3468	0.4078	0.2993	0.3193	0.3007
	11105	0.3451	0.458	0.3352	0.3161	0.2966
	11188	0.3434	0.4818	0.3417	0.3127	0.2934
	11271	0.3416	0.4815	0.3417	0.3101	0.2902
	11355	0.3402	0.4795	0.3413	0.3075	0.2873
	11438	0.339	0.4783	0.3402	0.3051	0.2845
	11521	0.339	0.4784	0.3387	0.303	0.2819
	11605	-0.2012	0.4766	0.3373	0.3008	0.2796
	11667	-0.1962	0.4754	0.3358	0.2996	0.2778
	11667	-0.2155	0.4737	0.3347	-0.0974	-0.0762
	11747	-0.2477	0.4717	0.3333	-0.1414	-0.1263
	1183	-0.2412	0.4699	0.332	-0.1469	-0.1339
	11913	-0.2276	0.4693	0.3309	-0.1548	-0.1444
	11997	-0.2189	0.4676	0.3294	-0.1664	-0.1568
	1208	-0.2132	0.4662	0.3283	-0.1832	-0.1708
	12163	-0.2091	0.4653	0.3281	-0.1972	-0.1815
	12247	-0.2067	0.4649	-0.18	-0.2045	-0.1896
	1233	-0.2059	-0.2377	-0.1446	-0.2084	-0.1945
	12413	-0.2073	-0.1873	-0.1531	-0.2117	-0.1983
	12497	-0.2111	-0.1579	-0.1682	-0.2146	-0.2018
	1258	-0.2169	-0.1629	-0.1786	-0.2184	-0.2056
	12663	-0.2262	-0.1722	-0.1788	-0.223	-0.2097
	12747	-0.2395	-0.1768	-0.1771	-0.2308	-0.2149
	1283	-0.2544	-0.1756	-0.1757	-0.2422	-0.2216
	12913	-0.2677	-0.1759	-0.1756	-0.2554	-0.2291
	12997	-0.276	-0.1752	-0.1768	-0.2685	-0.2384
	1308	-0.2807	-0.1771	-0.1797	-0.2808	-0.2493
	13163	-0.2833	-0.1781	-0.1856	-0.2895	-0.2575
	13247	-0.2853	-0.1824	-0.1986	-0.2992	-0.2659
	1333	-0.2862	-0.1882	-0.2276	-0.308	-0.2763
	13413	-0.2865	-0.1968	-0.2703	-0.3104	-0.2859
	13497	-0.2866	-0.2103	-0.31	-0.3092	-0.2886
	1358	-0.2865	-0.2384	-0.3266	-0.3065	-0.2863
	13663	-0.2865	-0.2885	-0.333	-0.303	-0.2824
	13747	-0.2863	-0.328	-0.3339	-0.2998	-0.2786
	1383	-0.2857	-0.3368	-0.3335	-0.2966	-0.275
	13913	-0.2853	-0.3379	-0.3324	-0.2941	-0.2718
	13997	-0.285	-0.3382	-0.3307	-0.2914	-0.2688
	1408	0.1704	-0.3376	-0.3292	-0.2891	-0.2662
	14163	0.1962	-0.3365	-0.3277	-0.2871	-0.2634
	14167	0.2087	-0.3355	-0.3262	0.0956	-0.2634
	14167	0.236	-0.3346	-0.3245	0.1456	0.0739
	1425	0.2367	-0.3326	-0.3227	0.1569	0.1232
	14333	0.2308	-0.3318	-0.3208	0.1693	0.138
	14417	0.2227	-0.3303	-0.3194	0.1861	0.1548
	1.45	0.2164	-0.3292	-0.3179	0.2015	0.1717
	14583	0.212	-0.3281	-0.3164	0.21	0.182
	14667	0.2091	-0.3271	0.174	0.2143	0.1885
	1475	0.207	-0.3262	0.1666	0.2181	0.194
	14833	0.2067	0.1807	0.1649	0.2224	0.1987
	14917	0.2078	0.1621	0.1609	0.2279	0.2023
	1.5	0.2103	0.1714	0.1574	0.2343	0.2061
	15083	0.2154	0.203	0.1548	0.2427	0.2103
	15167	0.2244	0.2532	0.1534	0.2526	0.2157
	1525	0.2381	0.2692	0.1528	0.2628	0.2215
	15333	0.2575	0.2773	0.1533	0.2724	0.2293
	15417	0.2755	0.2789	0.1542	0.2807	0.2377
	1.55	0.2854	0.2802	0.1557	0.2883	0.2462
	15583	0.2905	0.2831	0.1588	0.2958	0.2543
	15667	0.2927	0.2853	0.1627	0.3011	0.2624
	1575	0.2943	0.2897	0.1687	0.304	0.2703
	15833	0.295	0.2946	0.1781	0.3043	0.2769
	15917	0.2955	0.3019	0.1945	0.3028	0.2813
	1.6	0.2956	0.3133	0.223	0.2999	0.2844
	16083	0.2958	0.3341	0.2622	0.297	0.285
	16167	0.2953	0.3713	0.2911	0.2941	0.2821
	1625	0.2953	0.4119	0.3019	0.2921	0.2793
	16333	0.2952	0.4328	0.304	0.2908	0.2764
	16417	0.2949	0.4368	0.3043	0.2886	0.2738
	1.65	-0.1821	0.4372	0.3046	0.2873	0.2711
	16583	-0.1943	0.4371	0.304	0.2856	0.2689
	16667	-0.2107	0.4382	0.304	0.2856	0.2665
	16667	-0.2276	0.4374	0.3034	-0.0964	-0.0764
	1675	-0.2198	0.4368	0.303	-0.1327	-0.1243
	16833	-0.2082	0.4372	0.3028	-0.1452	-0.1417
	16917	-0.1992	0.4372	0.3022	-0.1591	-0.1565
	1.7	-0.1928	0.4438	0.3017	-0.1762	-0.1681
	17083	-0.1881	0.4435	0.3013	-0.1888	-0.1748
	17167	-0.185	0.4432	-0.1702	-0.1952	-0.1803
	1725	-0.1827	0.4429	-0.1531	-0.1989	-0.1835
	17333	-0.1815	0.4429	-0.1743	-0.2016	-0.1873
	17417	-0.1814	-0.2293	-0.1849	-0.2042	-0.1904
	1.75	-0.1824	-0.1792	-0.182	-0.2068	-0.1939
	17583	-0.1846	-0.1748	-0.1775	-0.2099	-0.1975
	17667	-0.1893	-0.1849	-0.1743	-0.2137	-0.2012
	1775	-0.1963	-0.1846	-0.1724	-0.219	-0.2049
	17833	-0.2071	-0.1798	-0.171	-0.2259	-0.2093
	17917	-0.2193	-0.1757	-0.1707	-0.2343	-0.214
	1.8	-0.2302	-0.1748	-0.1711	-0.2428	-0.2193
	18083	-0.2355	-0.1749	-0.1734	-0.2517	-0.2251
	18167	-0.2393	-0.1752	-0.1781	-0.2596	-0.2306
	1825	-0.2424	-0.1765	-0.1893	-0.2682	-0.2363
	18333	-0.2447	-0.1781	-0.2123	-0.2787	-0.2439
	18417	-0.2474	-0.1812	-0.2494	-0.288	-0.2543
	1.85	-0.2493	-0.1859	-0.2824	-0.2927	-0.2657
	18583	-0.2509	-0.194	-0.2926	-0.2937	-0.2729
	18667	-0.2508	-0.2093	-0.2953	-0.2921	-0.2721
	1875	-0.2512	-0.2389	-0.2959	-0.2895	-0.2691
	18833	-0.2514	-0.2708	-0.2958	-0.2873	-0.2663
	18917	-0.2519	-0.2935	-0.2952	-0.2845	-0.2631
	1.9	0.1485	-0.3008	-0.2946	-0.2819	-0.2607
	19083	0.1804	-0.3019	-0.2938	-0.2798	-0.2581
	19167	0.1923	-0.3022	-0.2929	-0.2776	-0.2555
	19167	0.2149	-0.3022	-0.2923	0.0962	0.0777
	1925	0.2224	-0.3019	-0.2915	0.1409	0.1211
	19333	0.2206	-0.3019	-0.2906	0.1537	0.1376
	19417	0.2139	-0.3021	-0.2897	0.1679	0.1521
	1.95	0.2076	-0.3014	-0.2891	0.1856	0.1646
	19583	0.2035	-0.301	-0.2885	0.2001	0.1739
	19667	0.2003	-0.3005	0.1629	0.2065	0.1797
	1975	0.1983	-0.3001	0.1792	0.2107	0.1838
	19833	0.1968	-0.2992	0.1745	0.2137	0.187
	19917	0.1984	-0.2988	0.1664	0.2172	0.1901
	2	0.1991	0.1673	0.1612	0.2206	0.1933
	20083	0.2015	0.1598	0.158	0.2245	0.1969
	20167	0.2052	0.1901	0.1562	0.2291	0.2009
	2025	0.2116	0.2403	0.1553	0.2351	0.2055
	20333	0.2213	0.2845	0.1548	0.2419	0.2103
	20417	0.2341	0.2857	0.1551	0.2496	0.2158
	2.05	0.2445	0.2853	0.156	0.2567	0.2207
	20583	0.2508	0.2866	0.1577	0.2633	0.2265
	20667	0.2547	0.2883	0.1601	0.2694	0.2326
	2075	0.2578	0.2895	0.164	0.2764	0.2386
	20833	0.2599	0.2924	0.1696	0.2839	0.2457
	20917	0.2615	0.2963	0.1783	0.2895	0.2537
	2.1	0.2631	0.3016	0.1919	0.2929	0.2618
	21083	0.2645	0.3065	0.2131	0.2926	0.2679
	21167	0.2659	0.3135	0.2387	0.2911	0.2714
	2125	0.267	0.3272	0.2587	0.2892	0.2714
	21333	0.2679	0.3474	0.2674	0.2868	0.2689
	21417	0.2691	0.3761	0.2703	0.2845	0.2663
	2.15	-0.1658	0.3976	0.2718	0.2824	0.2641
	21583	-0.1817	0.4098	0.2724	0.2804	0.2616
	21667	-0.1936	0.4133	0.2731	0.2782	0.2593
	21667	-0.2091	0.4154	0.2735	-0.0994	-0.0799
	2175	-0.2105	0.4159	0.274	-0.1315	-0.1238
	21833	-0.2042	0.4159	0.2744	-0.1461	-0.1435
	21917	-0.1971	0.4171	0.2747	-0.1608	-0.158
	2.2	-0.1911	0.4179	0.275	-0.1754	-0.1669
	22083	-0.187	0.4182	0.2752	-0.1858	-0.1722
	22167	-0.1836	0.4177	-0.1557	-0.1919	-0.1766
	2225	-0.1814	0.4177	-0.1582	-0.1955	-0.18
	22333	-0.1798	0.4188	-0.1818	-0.1983	-0.183
	22417	-0.1771	0.4195	-0.1887	-0.201	-0.1858
	2.25	-0.1769	0.4188	-0.1853	-0.2033	-0.1887
	22583	-0.1777	-0.2209	-0.181	-0.2055	-0.1916
	22667	-0.1791	-0.1698	-0.1774	-0.2085	-0.1946
	2275	-0.1818	-0.1757	-0.1745	-0.2125	-0.198
	22833	-0.1856	-0.1939	-0.1727	-0.2174	-0.2013
	22917	-0.1896	-0.1933	-0.1716	-0.2226	-0.2047
	2.3	-0.1942	-0.1884	-0.1711	-0.2284	-0.2087
	23083	-0.1977	-0.1852	-0.1719	-0.2343	-0.2123
	23167	-0.2001	-0.1829	-0.1737	-0.2398	-0.2158
	2325	-0.202	-0.1812	-0.1786	-0.2457	-0.22
	23333	-0.2035	-0.1817	-0.189	-0.2537	-0.225
	23417	-0.205	-0.1815	-0.21	-0.2641	-0.2313
	2.35	-0.2065	-0.1807	-0.2392	-0.2743	-0.2398
	23583	-0.2076	-0.1823	-0.2581	-0.2801	-0.252
	23667	-0.2091	-0.1846	-0.2638	-0.2821	-0.2615
	2375	-0.2102	-0.1888	-0.2651	-0.2818	-0.2621
	23833	-0.2107	-0.1963	-0.2651	-0.2802	-0.2599
	23917	-0.2122	-0.21	-0.2653	-0.2776	-0.2573
	2.4	0.1138	-0.2319	-0.2653	-0.2753	-0.2547
	24083	0.1579	-0.252	-0.2648	-0.2734	-0.2515
	24167	0.1691	-0.2676	-0.2644	-0.2714	-0.2502
	24167	0.1847	-0.2747	-0.2644	0.0974	0.0803
	2425	0.1977	-0.2764	-0.2642	0.1389	0.1186
	24333	0.2012	-0.2769	-0.2642	0.1518	0.1344
	24417	0.2	-0.2772	-0.2639	0.1643	0.1472
	2.45	0.1981	-0.277	-0.2638	0.1788	0.1577
	24583	0.1958	-0.2767	-0.2636	0.193	0.1672
	24667	0.1936	-0.2767	0.1504	0.2012	0.174
	2475	0.1922	-0.2769	0.1798	0.2058	0.1781
	24833	0.191	-0.2769	0.1798	0.2093	0.1818
	24917	0.1907	-0.2766	0.172	0.2122	0.1849
	2.5	0.1911	-0.2763	0.1664	0.2154	0.1878
	25083	0.1922	-0.2761	0.1626	0.2187	0.191
	25167	0.1948	0.1542	0.1603	0.2229	0.194
	2525	0.1987	0.1708	0.1588	0.2271	0.1977
	25333	0.2035	0.2029	0.1579	0.2317	0.2016
	25417	0.2093	0.2532	0.1574	0.237	0.2059
	2.55	0.2145	0.2937	0.1577	0.2427	0.2097
	25583	0.2177	0.292	0.1585	0.2482	0.2142
	25667	0.2197	0.2912	0.1597	0.2529	0.2189
	2575	0.2216	0.292	0.1623	0.259	0.2238
	25833	0.2232	0.2918	0.1659	0.2665	0.2291
	25917	0.2251	0.2932	0.171	0.2737	0.236
	2.6	0.2262	0.2964	0.1785	0.2799	0.2442
	26083	0.2276	0.2981	0.1894	0.2834	0.2538
	26167	0.2287	0.3001	0.2029	0.2836	0.2601
	2625	0.23	0.3039	0.2178	0.2824	0.2638
	26333	0.2313	0.3079	0.2294	0.2801	0.2627
	26417	0.2326	0.3146	0.236	0.2778	0.2599
	2.65	-0.1359	0.3252	0.2393	0.2758	0.258
	26583	-0.1652	0.3428	0.2413	0.2737	0.2557
	26667	-0.1754	0.3593	0.2427	0.2717	0.2535
	26667	-0.1859	0.3706	0.2438	-0.0993	-0.082
	2675	-0.1901	0.3777	0.2447	-0.1313	-0.1225
	26833	-0.1876	0.3805	0.2454	-0.1441	-0.1405
	26917	-0.1856	0.3823	0.2464	-0.156	-0.155
	2.7	-0.1827	0.3823	0.2473	-0.1679	-0.163
	27083	-0.1795	0.3831	0.2483	-0.1788	-0.1687
	27167	-0.1766	0.3841	-0.1369	-0.1872	-0.1725
	2725	-0.1745	0.3854	-0.1516	-0.1914	-0.176
	27333	-0.1728	0.3858	-0.1736	-0.1943	-0.1791
	27417	-0.1714	0.3869	-0.1855	-0.1972	-0.1817
	2.75	-0.1707	0.3881	-0.1873	-0.1998	-0.1838
	27583	-0.1704	0.3906	-0.1839	-0.202	-0.1864
	27667	-0.1705	0.3907	-0.1801	-0.2045	-0.189
	2775	-0.1716	-0.1963	-0.1772	-0.2067	-0.1916
	27833	-0.1727	-0.1653	-0.1748	-0.2103	-0.1942
	27917	-0.1748	-0.1821	-0.1731	-0.2145	-0.1968
	2.8	-0.1756	-0.1931	-0.1724	-0.2189	-0.1998
	28083	-0.1765	-0.192	-0.1725	-0.2238	-0.2023
	28167	-0.1769	-0.1884	-0.1734	-0.2284	-0.2052
	2825	-0.1775	-0.1864	-0.1757	-0.2335	-0.2084
	28333	-0.1783	-0.185	-0.1803	-0.2393	-0.2126
	28417	-0.1786	-0.1841	-0.1897	-0.2465	-0.2177
	2.85	-0.1795	-0.1835	-0.2067	-0.2561	-0.2245
	28583	-0.1801	-0.1829	-0.2251	-0.2663	-0.2338
	28667	-0.1803	-0.1832	-0.2358	-0.2724	-0.2464
	2875	-0.1807	-0.1835	-0.239	-0.275	-0.2535
	28833	-0.181	-0.1856	-0.2396	-0.2747	-0.2531
	28917	-0.1817	-0.189	-0.2401	-0.2732	-0.2511
	2.9	0.084	-0.194	-0.2403	-0.2709	-0.249
	29083	0.1341	-0.2041	-0.2403	-0.2686	-0.2467
	29167	0.1485	-0.2178	-0.2404	-0.2667	-0.2442
	29167	0.1623	-0.2316	-0.2403	0.1002	0.0835
	2925	0.1734	-0.2424	-0.2406	0.1382	0.1171
	29333	0.1803	-0.2483	-0.2407	0.1489	0.131
	29417	0.185	-0.2499	-0.2409	0.1595	0.1434
	2.95	0.1872	-0.2508	-0.2409	0.1707	0.1531
	29583	0.1868	-0.2512	-0.2412	0.1827	0.1612
	29667	0.1864	-0.2523	0.136	0.193	0.1681
	2975	0.1868	-0.2531	0.1717	0.1991	0.1731
	29833	0.187	-0.2531	0.1803	0.2026	0.1766
	29917	0.1876	-0.254	0.1775	0.2059	0.1795
	3	0.1881	-0.2546	0.1725	0.209	0.1821
	30083	0.1894	-0.2551	0.1685	0.2119	0.1852
	30167	0.1911	-0.2554	0.1655	0.2151	0.1881
	3025	0.1933	0.1409	0.1635	0.2187	0.191
	30333	0.1958	0.1714	0.1618	0.223	0.1945
	30417	0.1984	0.2024	0.1611	0.2273	0.198
	3.05	0.2003	0.2526	0.1604	0.2319	0.2013
	30583	0.2015	0.2873	0.1603	0.2361	0.2052
	30667	0.2027	0.2853	0.1606	0.2407	0.2091
	3075	0.2033	0.2847	0.1617	0.2451	0.2132
	30833	0.2039	0.284	0.1632	0.2506	0.2177
	30917	0.2045	0.2837	0.1659	0.2587	0.223
	3.1	0.2052	0.2831	0.1698	0.267	0.2299
	31083	0.2058	0.2828	0.1751	0.2735	0.2401
	31167	0.2064	0.2831	0.182	0.2767	0.2503
	3125	0.2071	0.2837	0.1897	0.2766	0.2564
	31333	0.2076	0.285	0.1972	0.2749	0.257
	31417	0.2081	0.2871	0.2035	0.2729	0.2551
	3.15	0.2079	0.2909	0.2078	0.2709	0.2529
	31583	-0.1116	0.2975	0.2108	0.2692	0.2508
	31667	-0.1443	0.3069	0.2131	0.2673	0.2488
	31667	-0.1536	0.3182	0.2145	-0.1019	-0.0843
	3175	-0.1612	0.3263	0.2154	-0.1341	-0.1235
	31833	-0.1656	0.3324	0.2166	-0.1446	-0.1383
	31917	-0.1679	0.3361	0.2177	-0.1545	-0.1508
	3.2	-0.1693	0.3385	0.2186	-0.1649	-0.1598
	32083	-0.1693	0.3399	0.2197	-0.1737	-0.1656
	32167	-0.1675	0.3411	-0.1139	-0.1812	-0.1695
	3225	-0.1659	0.3422	-0.1392	-0.1868	-0.1728
	32333	-0.165	0.3428	-0.1588	-0.191	-0.1754
	32417	-0.1635	0.3433	-0.173	-0.1934	-0.1777
	3.25	-0.1629	0.3449	-0.1801	-0.1955	-0.1801
	32583	-0.1621	0.3463	-0.1817	-0.1981	-0.1824
	32667	-0.1621	0.3477	-0.1798	-0.2009	-0.1846
	3275	-0.1617	0.3484	-0.1774	-0.2035	-0.1868
	32833	-0.1614	-0.1713	-0.1752	-0.2065	-0.1888
	32917	-0.1615	-0.1495	-0.1739	-0.2102	-0.1911
	3.3	-0.1618	-0.1659	-0.173	-0.2139	-0.1936
	33083	-0.1621	-0.1814	-0.1727	-0.2178	-0.196
	33167	-0.1626	-0.1949	-0.1733	-0.2219	-0.1983
	3325	-0.1626	-0.1936	-0.1745	-0.2262	-0.2015
	33333	-0.1633	-0.1917	-0.1768	-0.2308	-0.2044
	33417	-0.1632	-0.1899	-0.1809	-0.2361	-0.2085
	3.35	-0.1633	-0.1882	-0.1881	-0.2442	-0.214
	33583	-0.164	-0.1865	-0.1983	-0.2551	-0.2213
	33667	-0.1633	-0.1855	-0.2082	-0.2638	-0.2328
	3375	-0.163	-0.1855	-0.2137	-0.2683	-0.2447
	33833	-0.1633	-0.1853	-0.2155	-0.2697	-0.247
	33917	-0.1638	-0.1838	-0.2164	-0.2685	-0.2456
	3.4	-0.1637	-0.1859	-0.2166	-0.2665	-0.2436
	34083	0.0645	-0.1882	-0.2168	-0.2644	-0.2416
	34167	0.1147	-0.192	-0.2172	-0.2628	-0.2395
	34167	0.1316	-0.1987	-0.2175	0.1009	0.0851
	3425	0.1441	-0.209	-0.2178	0.1377	0.1167
	34333	0.1539	-0.2183	-0.218	0.1478	0.1295
	34417	0.1643	-0.2245	-0.2183	0.1565	0.1398
	3.45	0.1722	-0.228	-0.2186	0.1643	0.1493
	34583	0.1754	-0.2296	-0.2187	0.173	0.1571
	34667	0.1765	-0.2308	0.1197	0.1823	0.1637
	3475	0.1771	-0.2316	0.1582	0.1904	0.1688
	34833	0.1771	-0.232	0.1719	0.1963	0.1724
	34917	0.1772	-0.2323	0.1768	0.2003	0.1752
	3.5	0.1777	-0.2331	0.1762	0.2035	0.1777
	35083	0.178	-0.2337	0.173	0.2065	0.1806
	35167	0.1785	-0.2343	0.1701	0.2094	0.1826
	3525	0.1791	-0.2349	0.1678	0.2129	0.1856
	35333	0.1795	0.124	0.1656	0.2164	0.1884
	35417	0.1804	0.1553	0.164	0.2201	0.1919
	3.55	0.1812	0.1847	0.1626	0.2239	0.1952
	35583	0.182	0.2303	0.1618	0.2279	0.1984
	35667	0.1823	0.2798	0.1614	0.2317	0.202
	3575	0.1827	0.2847	0.1614	0.236	0.2055
	35833	0.1832	0.2842	0.1618	0.2407	0.2088
	35917	0.1835	0.286	0.1627	0.2468	0.2136
	3.6	0.1839	0.2865	0.1646	0.2557	0.2195
	36083	0.1844	0.2871	0.167	0.2647	0.2282
	36167	0.1846	0.2883	0.1699	0.27	0.2398
	3625	0.185	0.2883	0.1734	0.2717	0.2491
	36333	0.1852	0.2873	0.1768	0.2706	0.2511
	36417	0.1855	0.2877	0.1801	0.2689	0.2494
	3.65	0.1859	0.2885	0.1829	0.2676	0.2477
	36583	0.1859	0.2914	0.1853	0.2653	0.2459
	36667	-0.0877	0.2946	0.1868	0.2636	0.2439
	36667	-0.1266	0.2969	0.1884	-0.1029	-0.0849
	3675	-0.1369	0.3008	0.1891	-0.136	-0.1231
	36833	-0.145	0.3045	0.1901	-0.1452	-0.1347
	36917	-0.1508	0.3091	0.1908	-0.153	-0.1441
	3.7	-0.1548	0.3117	0.1916	-0.1611	-0.1531
	37083	-0.1568	0.3143	0.1923	-0.1688	-0.1604
	37167	-0.158	0.3182	-0.0884	-0.1765	-0.1661
	3725	-0.1583	0.3191	-0.1237	-0.182	-0.169
	37333	-0.1575	0.3208	-0.1388	-0.1864	-0.172
	37417	-0.1551	0.3243	-0.1511	-0.1894	-0.1739
	3.75	-0.1556	0.3257	-0.1612	-0.1919	-0.1763
	37583	-0.1551	0.3269	-0.1682	-0.194	-0.1786
	37667	-0.1545	0.3268	-0.1711	-0.1966	-0.1804
	3775	-0.1537	0.3286	-0.1711	-0.1991	-0.1824
	37833	-0.153	-0.1551	-0.1707	-0.2018	-0.1844
	37917	-0.1528	-0.1411	-0.1699	-0.205	-0.1864
	3.8	-0.1528	-0.1531	-0.1695	-0.2084	-0.1879
	38083	-0.1524	-0.1678	-0.1695	-0.2119	-0.1901
	38167	-0.1513	-0.1801	-0.1696	-0.2154	-0.1925
	3825	-0.1511	-0.1823	-0.1705	-0.2193	-0.1946
	38333	-0.1511	-0.1836	-0.1716	-0.223	-0.1975
	38417	-0.1507	-0.1833	-0.1731	-0.2277	-0.2015
	3.85	-0.1502	-0.1827	-0.1759	-0.2341	-0.2062
	38583	-0.1493	-0.182	-0.1794	-0.2444	-0.2132
	38667	-0.1493	-0.182	-0.1833	-0.2555	-0.223
	3875	-0.1493	-0.182	-0.1876	-0.2621	-0.2361
	38833	-0.1493	-0.1818	-0.1899	-0.2642	-0.2409
	38917	-0.1493	-0.1824	-0.191	-0.2633	-0.2403
	3.9	-0.1481	-0.1827	-0.1919	-0.2613	-0.2386
	39083	-0.1482	-0.1843	-0.1923	-0.2599	-0.2369
	39167	0.0492	-0.1856	-0.193	-0.2581	-0.2352
	39167	0.0993	-0.1879	-0.1931	0.0986	0.0866
	3925	0.1174	-0.1919	-0.1933	0.1357	0.1185
	39333	0.1301	-0.1974	-0.1939	0.146	0.1296
	39417	0.1411	-0.2026	-0.1939	0.1527	0.1394
	3.95	0.1479	-0.2056	-0.194	0.1612	0.147
	39583	0.1534	-0.2071	-0.1945	0.1704	0.1547
	39667	0.1583	-0.2082	0.0967	0.1788	0.1606
	3975	0.1624	-0.209	0.1409	0.1861	0.1653
	39833	0.1637	-0.2099	0.1553	0.1926	0.1685
	39917	0.1641	-0.2103	0.1627	0.1971	0.1713
	4	0.1646	-0.2117	0.1664	0.2003	0.1736
	40083	0.1652	-0.2123	0.1666	0.2035	0.176
	40167	0.1653	-0.2132	0.1658	0.2062	0.1786
	4025	0.1653	-0.214	0.1646	0.2093	0.1814
	40333	0.1655	0.104	0.163	0.2122	0.1843
	40417	0.1656	0.1543	0.1617	0.2158	0.187
	4.05	0.1656	0.1821	0.1609	0.219	0.1901
	40583	0.1659	0.2274	0.1603	0.2227	0.1928
	40667	0.1661	0.2776	0.1595	0.2261	0.196
	4075	0.1662	0.2863	0.1594	0.23	0.1991
	40833	0.1664	0.2894	0.1589	0.2338	0.2023
	40917	0.1666	0.2894	0.1595	0.2392	0.2067
	4.1	0.1666	0.2892	0.16	0.2467	0.2119
	41083	0.1666	0.2889	0.1609	0.2576	0.2204
	41167	0.1667	0.2883	0.162	0.2654	0.2323
	4125	0.1673	0.2889	0.1633	0.2673	0.243
	41333	0.1673	0.2885	0.1647	0.267	0.2451
	41417	0.1672	0.2889	0.1656	0.2654	0.2436
	4.15	0.1679	0.2902	0.1666	0.2636	0.2419
	41583	0.1681	0.2905	0.1676	0.2619	0.2406
	41667	0.1681	0.2918	0.1682	0.2601	0.2387
	41667	-0.0684	0.2943	0.1691	-0.1019	-0.0846
	4175	-0.1116	0.2958	0.1695	-0.1365	-0.124
	41833	-0.1241	0.2978	0.1698	-0.1434	-0.133
	41917	-0.1324	0.2992	0.1702	-0.1504	-0.1391
	4.2	-0.1383	0.3004	0.1707	-0.1575	-0.1444
	42083	-0.1403	0.3011	0.1711	-0.1661	-0.1505
	42167	-0.1427	0.3021	-0.0663	-0.1731	-0.1556
	4225	-0.1443	0.3021	-0.1102	-0.18	-0.1598
	42333	-0.1452	0.3025	-0.1244	-0.1838	-0.1637
	42417	-0.1452	0.303	-0.1351	-0.1867	-0.1673
	4.25	-0.1452	0.3036	-0.1438	-0.189	-0.1698
	42583	-0.1446	0.3045	-0.1514	-0.1913	-0.1727
	42667	-0.1441	0.3069	-0.1563	-0.1943	-0.1754
	4275	-0.1441	0.3071	-0.1591	-0.1968	-0.1777
	42833	-0.1435	0.3072	-0.1603	-0.1994	-0.1797
	42917	-0.14	-0.156	-0.1608	-0.2026	-0.1815
	4.3	-0.1397	-0.1283	-0.1611	-0.2049	-0.1832
	43083	-0.1394	-0.1386	-0.1614	-0.2081	-0.1852
	43167	-0.1391	-0.1482	-0.1615	-0.2113	-0.1873
	4325	-0.1388	-0.1595	-0.1618	-0.2146	-0.1894
	43333	-0.138	-0.1688	-0.1627	-0.218	-0.1917
	43417	-0.1382	-0.1736	-0.163	-0.2221	-0.1951
	4.35	-0.138	-0.1759	-0.164	-0.2276	-0.1989
	43583	-0.1382	-0.1768	-0.1647	-0.2361	-0.2047
	43667	-0.1385	-0.1778	-0.1661	-0.2488	-0.214
	4375	-0.1382	-0.1783	-0.1672	-0.2576	-0.2279
	43833	-0.1382	-0.1768	-0.1684	-0.2602	-0.2361
	43917	-0.1382	-0.1768	-0.1691	-0.2596	-0.2361
	4.4	-0.1383	-0.1772	-0.1696	-0.2581	-0.2351
	44083	-0.1383	-0.1775	-0.1701	-0.2561	-0.2332
	44167	-0.138	-0.1772	-0.1707	-0.2543	-0.2313
	44167	0.0399	-0.1769	-0.1707	0.0994	0.0884
	4425	0.09	-0.178	-0.1708	0.1366	0.1196
	44333	0.1064	-0.1792	-0.1713	0.146	0.1292
	44417	0.1202	-0.1803	-0.1716	0.1534	0.1363
	4.45	0.1308	-0.181	-0.1714	0.1608	0.144
	44583	0.1385	-0.1821	-0.1716	0.1691	0.1511
	44667	0.147	-0.1835	0.0718	0.1774	0.1582
	4475	0.1508	-0.1841	0.1211	0.1838	0.1621
	44833	0.1537	-0.1852	0.1348	0.1893	0.1656
	44917	0.1551	-0.1856	0.1432	0.1936	0.1681
	4.5	0.1559	-0.1867	0.1481	0.1972	0.1705
	45083	0.1557	-0.1873	0.151	0.2001	0.1727
	45167	0.1556	-0.1879	0.1522	0.2029	0.1749
	4525	0.1562	-0.189	0.1531	0.2058	0.1774
	45333	0.1563	-0.1901	0.1531	0.2084	0.1797
	45417	0.1565	0.0779	0.1533	0.2113	0.1824
	4.55	0.1569	0.1283	0.153	0.2143	0.1855
	45583	0.1571	0.1548	0.1527	0.2174	0.1884
	45667	0.1568	0.1818	0.1527	0.2207	0.1913
	4575	0.1568	0.2319	0.1527	0.2244	0.1939
	45833	0.1574	0.2543	0.1527	0.2285	0.1972
	45917	0.1572	0.2601	0.1528	0.2331	0.201
	4.6	0.1574	0.2636	0.1528	0.2404	0.2062
	46083	0.1574	0.266	0.1531	0.2511	0.2143
	46167	0.1574	0.2667	0.1536	0.2604	0.2262
	4625	0.1575	0.2673	0.1539	0.2628	0.2378
	46333	0.1579	0.2683	0.1543	0.2625	0.2407
	46417	0.1579	0.2692	0.1543	0.261	0.2392
	4.65	0.1579	0.2694	0.1545	0.2593	0.2377
	46583	0.1582	0.2696	0.1547	0.2575	0.2361
	46667	0.1583	0.2703	0.155	0.256	0.2346
	46667	0.1582	0.2712	0.1553	-0.1026	-0.0851
	4675	-0.0594	0.2717	0.1553	-0.1357	-0.1228
	46833	-0.1052	0.2726	0.1554	-0.1431	-0.1313
	46917	-0.1144	0.2731	0.1554	-0.1493	-0.1377
	4.7	-0.1231	0.2732	0.1559	-0.156	-0.1438
	47083	-0.1292	0.2735	0.1563	-0.1638	-0.1495
	47167	-0.1334	0.2741	-0.0506	-0.1711	-0.1553
	4725	-0.1365	0.2744	-0.099	-0.1774	-0.1603
	47333	-0.1379	0.2749	-0.1133	-0.1817	-0.1629
	47417	-0.1389	0.2749	-0.1234	-0.1849	-0.1655
	4.75	-0.1391	0.2752	-0.1313	-0.1872	-0.1678
	47583	-0.1395	0.2758	-0.1371	-0.1896	-0.1701
	47667	-0.1394	0.276	-0.1418	-0.1919	-0.172
	4775	-0.1394	0.2758	-0.1455	-0.1946	-0.174
	47833	-0.1388	0.2763	-0.1476	-0.1972	-0.1762
	47917	-0.1382	0.2763	-0.1489	-0.1997	-0.1781
	4.8	-0.1377	-0.1196	-0.1496	-0.2024	-0.18
	48083	-0.1379	-0.1185	-0.1502	-0.205	-0.182
	48167	-0.1376	-0.131	-0.1507	-0.2073	-0.1839
	4825	-0.1373	-0.1397	-0.1507	-0.2103	-0.1859
	48333	-0.1373	-0.1495	-0.1511	-0.2136	-0.1885
	48417	-0.1369	-0.1569	-0.1513	-0.2172	-0.1914
	4.85	-0.1369	-0.1624	-0.1516	-0.2222	-0.196
	48583	-0.1368	-0.1655	-0.1521	-0.2302	-0.202
	48667	-0.1362	-0.1638	-0.1522	-0.2433	-0.2122
	4875	-0.1359	-0.165	-0.1525	-0.2538	-0.2262
	48833	-0.1356	-0.1659	-0.1527	-0.2567	-0.2323
	48917	-0.1356	-0.1666	-0.153	-0.2558	-0.2322
	4.9	-0.1351	-0.1669	-0.1533	-0.2543	-0.2306
	49083	-0.1353	-0.167	-0.1533	-0.2529	-0.2288
	49167	-0.1354	-0.1675	-0.1537	-0.2511	-0.2277
	49167	-0.1357	-0.1676	-0.1539	0.0991	0.0886
	4925	0.0381	-0.1679	-0.1542	0.136	0.1215
	49333	0.0883	-0.1681	-0.1543	0.1449	0.1296
	49417	0.1063	-0.1685	-0.1545	0.1521	0.136
	4.95	0.1177	-0.1688	-0.1545	0.1606	0.1432
	49583	0.1267	-0.1691	-0.1547	0.1698	0.1496
	49667	0.1336	-0.1696	0.0524	0.1781	0.1556
	4975	0.1385	-0.1699	0.1025	0.1841	0.1604
	49833	0.1423	-0.1702	0.1173	0.1893	0.1637
	49917	0.1449	-0.1702	0.127	0.1926	0.1659
	5	0.1466	-0.1705	0.1336	0.1951	0.1682
	50083	0.147	-0.171	0.1374	0.1975	0.1705
	50167	0.1476	-0.1714	0.14	0.2003	0.1727
	5025	0.1481	-0.1717	0.1417	0.2029	0.1746
	50333	0.1482	-0.1719	0.1427	0.2055	0.1771
	50417	0.1481	-0.172	0.1437	0.2078	0.1798
	5.05	0.1482	0.0573	0.1443	0.2103	0.1824
	50583	0.1482	0.1077	0.1441	0.2134	0.185
	50667	0.1479	0.1357	0.1443	0.2161	0.1873
	5075	0.1482	0.1547	0.1444	0.219	0.1904
	50833	0.1479	0.193	0.1444	0.223	0.1934
	50917	0.1482	0.2265	0.1446	0.2274	0.1971
	5.1	0.1482	0.2369	0.1446	0.2343	0.202
	51083	0.1482	0.2409	0.1449	0.2454	0.2094
	51167	0.149	0.2425	0.1447	0.2561	0.2213
	5125	0.149	0.2467	0.1446	0.2586	0.2335
	51333	0.149	0.2479	0.1447	0.258	0.2361
	51417	0.149	0.2486	0.1447	0.2564	0.2351
	5.15	0.1492	0.2486	0.1446	0.2552	0.2337
	51583	0.1492	0.249	0.1447	0.2535	0.2325
	51667	0.1492	0.2496	0.1449	0.2522	0.2308
	51667	0.1492	0.249	0.1446	-0.1008	-0.0843
	5175	0.1492	0.2493	0.145	-0.1351	-0.1208
	51833	-0.0513	0.2502	0.1452	-0.1432	-0.1283
	51917	-0.0983	0.2494	0.145	-0.1504	-0.1337
	5.2	-0.1119	0.2494	0.1455	-0.1579	-0.1388
	52083	-0.1206	0.2496	0.1455	-0.1649	-0.144
	52167	-0.1263	0.2503	0.1456	-0.1708	-0.1489
	5225	-0.1301	0.2547	-0.0404	-0.1765	-0.1543
	52333	-0.1327	0.2554	-0.0904	-0.1806	-0.1585
	52417	-0.1331	0.2563	-0.1051	-0.1829	-0.1612
	5.25	-0.1342	0.2566	-0.1148	-0.1847	-0.1635
	52583	-0.1348	0.2567	-0.1226	-0.1872	-0.1659
	52667	-0.1356	0.2573	-0.1284	-0.1893	-0.1676
	5275	-0.1357	0.2576	-0.1328	-0.1914	-0.1699
	52833	-0.136	0.2578	-0.136	-0.1939	-0.1719
	52917	-0.1357	0.2578	-0.1383	-0.1966	-0.1742
	5.3	-0.1351	0.2583	-0.14	-0.1992	-0.1766
	53083	-0.1348	-0.1177	-0.1409	-0.2016	-0.1781
	53167	-0.1339	-0.1138	-0.1417	-0.2044	-0.18
	5325	-0.1339	-0.1202	-0.1421	-0.2068	-0.1823
	53333	-0.1342	-0.1304	-0.1426	-0.2096	-0.1844
	53417	-0.1339	-0.1392	-0.1426	-0.2126	-0.1872
	5.35	-0.1337	-0.1452	-0.1429	-0.2172	-0.1908
	53583	-0.1334	-0.1501	-0.1431	-0.2247	-0.1963
	53667	-0.1336	-0.1534	-0.1431	-0.2378	-0.2047
	5375	-0.1328	-0.1556	-0.1432	-0.2497	-0.2186
	53833	-0.1318	-0.1572	-0.1434	-0.2528	-0.2282
	53917	-0.1319	-0.1577	-0.1435	-0.2519	-0.2288
	5.4	-0.1319	-0.1566	-0.1438	-0.2502	-0.2276
	54083	-0.1318	-0.1574	-0.1438	-0.2486	-0.2262
	54167	-0.1321	-0.158	-0.144	-0.247	-0.2245
	54167	-0.1324	-0.1582	-0.1441	0.0991	0.0883
	5425	-0.1324	-0.1585	-0.144	0.1365	0.1217
	54333	0.0359	-0.1588	-0.1444	0.1452	0.1299
	54417	0.086	-0.1588	-0.1443	0.1516	0.1366
	5.45	0.1032	-0.1589	-0.1444	0.158	0.1434
	54583	0.1154	-0.1591	-0.1446	0.1653	0.1505
	54667	0.1246	-0.1591	-0.1447	0.1725	0.1562
	5475	0.1308	-0.1592	-0.1444	0.178	0.16
	54833	0.1365	-0.1594	0.041	0.183	0.1632
	54917	0.1402	-0.1597	0.091	0.1868	0.1653
	5.5	0.1424	-0.1597	0.107	0.1897	0.1675
	55083	0.144	-0.1598	0.1171	0.1928	0.1691
	55167	0.145	-0.16	0.1246	0.1954	0.1713
	5525	0.1453	-0.1603	0.1296	0.198	0.1733
	55333	0.1458	-0.1604	0.1327	0.2007	0.1757
	55417	0.1456	-0.1611	0.1347	0.203	0.178
	5.55	0.146	-0.1612	0.1363	0.2059	0.1804
	55583	0.146	0.0455	0.1373	0.2085	0.183
	55667	0.146	0.0958	0.1382	0.2111	0.1853
	5575	0.1458	0.1319	0.1385	0.2137	0.1881
	55833	0.1458	0.1542	0.1385	0.2169	0.1913
	55917	0.1458	0.1814	0.1388	0.2212	0.1949
	5.6	0.1456	0.2067	0.1386	0.227	0.2
	56083	0.1456	0.2174	0.1389	0.2369	0.2081
	56167	0.1453	0.2221	0.1388	0.2496	0.2204
	5625	0.1456	0.2258	0.1386	0.2541	0.2314
	56333	0.1456	0.2285	0.1388	0.2543	0.2326
	56417	0.1456	0.2303	0.1385	0.2531	0.2317
	5.65	0.1456	0.2308	0.1388	0.2517	0.2303
	56583	0.1455	0.2313	0.1386	0.25	0.2287
	56667	0.1455	0.2317	0.1388	0.2491	0.2274
	56667	0.1455	0.2323	0.1388	-0.1017	-0.0843
	5675	0.1455	0.2334	0.1388	-0.1359	-0.1194
	56833	0.1456	0.2328	0.1388	-0.144	-0.1283
	56917	-0.0478	0.2337	0.1389	-0.1502	-0.1342
	5.7	-0.0953	0.234	0.1389	-0.1559	-0.1397
	57083	-0.1084	0.2343	0.1389	-0.1626	-0.1455
	57167	-0.1171	0.2345	0.1392	-0.1685	-0.1508
	5725	-0.1232	0.2352	0.1392	-0.1733	-0.1547
	57333	-0.1272	0.236	0.1395	-0.1769	-0.158
	57417	-0.1299	0.2364	-0.0347	-0.1794	-0.1604
	5.75	-0.1318	0.2363	-0.0849	-0.1817	-0.1624
	57583	-0.1334	0.2367	-0.1	-0.1836	-0.1647
	57667	-0.1341	0.2367	-0.1096	-0.1861	-0.1666
	5775	-0.1342	0.237	-0.117	-0.1887	-0.169
	57833	-0.1345	0.2369	-0.1223	-0.1908	-0.1708
	57917	-0.1347	0.2372	-0.1266	-0.1931	-0.173
	5.8	-0.1345	0.2364	-0.1299	-0.1957	-0.1745
	58083	-0.1347	0.2367	-0.1322	-0.1978	-0.1762
	58167	-0.1347	-0.098	-0.1341	-0.2001	-0.178
	5825	-0.1345	-0.1089	-0.1353	-0.2026	-0.18
	58333	-0.1347	-0.1217	-0.1362	-0.2053	-0.1826
	58417	-0.1337	-0.1301	-0.1365	-0.2084	-0.1852
	5.85	-0.1334	-0.1377	-0.1369	-0.2126	-0.1893
	58583	-0.1333	-0.144	-0.1373	-0.2192	-0.1943
	58667	-0.1334	-0.1482	-0.1376	-0.2314	-0.2033
	5875	-0.1333	-0.1516	-0.1376	-0.2448	-0.2174
	58833	-0.133	-0.1534	-0.1382	-0.2488	-0.2255
	58917	-0.1327	-0.155	-0.1382	-0.2482	-0.2258
	5.9	-0.1325	-0.1553	-0.1382	-0.2468	-0.225
	59083	-0.1322	-0.1554	-0.1385	-0.2453	-0.2235
	59167	-0.1312	-0.156	-0.1386	-0.2438	-0.2222
	59167	-0.1312	-0.1562	-0.1388	0.0991	0.0877
	5925	-0.1312	-0.1563	-0.1391	0.1356	0.1215
	59333	-0.131	-0.1566	-0.1389	0.1449	0.1298
	59417	0.0347	-0.1569	-0.1391	0.1514	0.136
	5.95	0.0848	-0.1574	-0.1389	0.1579	0.1424
	59583	0.1014	-0.158	-0.1391	0.1644	0.1485
	59667	0.1122	-0.158	-0.1392	0.171	0.1534
	5975	0.1202	-0.1579	-0.1392	0.1777	0.1577
	59833	0.1266	-0.1579	-0.1392	0.1826	0.1606
	59917	0.131	-0.1583	-0.1394	0.1862	0.1627
	6	0.1342	-0.158	0.0355	0.189	0.165
	60083	0.1365	-0.1586	0.0857	0.1908	0.1669
	60167	0.1383	-0.1586	0.1022	0.1936	0.169
	6025	0.1394	-0.1586	0.1124	0.1957	0.1711
	60333	0.1402	-0.1589	0.1194	0.198	0.1731
	60417	0.1402	-0.1591	0.1247	0.2003	0.1754
	6.05	0.1405	-0.1592	0.1283	0.2027	0.1777
	60583	0.1405	-0.1594	0.1305	0.2053	0.18
	60667	0.1405	0.0439	0.1322	0.2074	0.1826
	6075	0.1405	0.0947	0.1333	0.2102	0.1849
	60833	0.1405	0.1289	0.1337	0.2132	0.1879
	60917	0.1403	0.1518	0.1344	0.2174	0.1914
	6.1	0.1405	0.1759	0.1348	0.2226	0.196
	61083	0.1403	0.2027	0.135	0.2314	0.2033
	61167	0.1403	0.2195	0.135	0.2447	0.2151
	6125	0.1403	0.2262	0.1351	0.2506	0.2265
	61333	0.1402	0.2314	0.1351	0.2511	0.2293
	61417	0.1402	0.2343	0.1351	0.2497	0.2282
	6.15	0.14	0.2366	0.1348	0.2485	0.227
	61583	0.14	0.2384	0.1351	0.2473	0.2261
	61667	0.14	0.2398	0.1348	0.2457	0.2242
	61667	0.14	0.241	0.135	-0.1008	-0.0834
	6175	0.14	0.2422	0.1348	-0.136	-0.1188
	61833	0.1398	0.2427	0.1348	-0.1441	-0.1276
	61917	0.14	0.2435	0.135	-0.1501	-0.1337
	6.2	-0.044	0.2438	0.135	-0.1559	-0.1395
	62083	-0.0916	0.2441	0.1351	-0.162	-0.1456
	62167	-0.1051	0.2444	0.1351	-0.1664	-0.1511
	6225	-0.1141	0.2448	0.1351	-0.1713	-0.1556
	62333	-0.1202	0.2445	0.1353	-0.1751	-0.1583
	62417	-0.1244	0.2448	0.1353	-0.1774	-0.1609
	6.25	-0.1273	0.2448	0.1351	-0.1795	-0.1629
	62583	-0.1295	0.2451	-0.0315	-0.1817	-0.1647
	62667	-0.1307	0.245	-0.0817	-0.1833	-0.1666
	6275	-0.1315	0.2453	-0.0967	-0.1861	-0.1685
	62833	-0.1318	0.2453	-0.1063	-0.1887	-0.1705
	62917	-0.1322	0.2467	-0.1136	-0.1908	-0.1724
	6.3	-0.1322	0.2473	-0.1188	-0.1933	-0.174
	63083	-0.1325	0.248	-0.1231	-0.1958	-0.1757
	63167	-0.1327	0.2483	-0.1264	-0.198	-0.1777
	6325	-0.1325	-0.1064	-0.1289	-0.2003	-0.1794
	63333	-0.1325	-0.1081	-0.1305	-0.2027	-0.1818
	63417	-0.1324	-0.1147	-0.1319	-0.2058	-0.1849
	6.35	-0.1324	-0.1226	-0.133	-0.2097	-0.1885
	63583	-0.1319	-0.1299	-0.1336	-0.2157	-0.1946
	63667	-0.1319	-0.1362	-0.1342	-0.2271	-0.2044
	6375	-0.1318	-0.1371	-0.1345	-0.241	-0.218
	63833	-0.1318	-0.1406	-0.135	-0.2454	-0.2239
	63917	-0.1316	-0.1431	-0.1351	-0.2448	-0.2236
	6.4	-0.1318	-0.145	-0.1353	-0.2435	-0.2227
	64083	-0.1313	-0.1461	-0.1356	-0.2421	-0.221
	64167	-0.1313	-0.1473	-0.1356	-0.2407	-0.2198
	64167	-0.1313	-0.1479	-0.1356	0.0977	0.0872
	6425	-0.131	-0.1484	-0.1359	0.136	0.1218
	64333	-0.1307	-0.1489	-0.1359	0.1449	0.131
	64417	-0.1308	-0.1493	-0.136	0.1511	0.1382
	6.45	0.0353	-0.1504	-0.136	0.1575	0.1443
	64583	0.0855	-0.1518	-0.1362	0.1632	0.1501
	64667	0.1017	-0.1522	-0.1363	0.1704	0.154
	6475	0.1122	-0.1525	-0.1365	0.1763	0.1577
	64833	0.1199	-0.1525	-0.1363	0.181	0.1608
	64917	0.1267	-0.1525	-0.1363	0.1846	0.1627
	6.5	0.1307	-0.1525	-0.1363	0.1872	0.1646
	65083	0.1339	-0.1528	-0.136	0.1893	0.1662
	65167	0.1363	-0.1528	0.033	0.1913	0.1681
	6525	0.1379	-0.1531	0.0832	0.1934	0.1702
	65333	0.1397	-0.1534	0.0996	0.1957	0.1724
	65417	0.1421	-0.1533	0.1098	0.1977	0.1742
	6.55	0.1423	-0.1533	0.1168	0.2	0.1762
	65583	0.1429	-0.1548	0.1215	0.2023	0.1783
	65667	0.1431	-0.1551	0.1252	0.2045	0.181
	6575	0.1432	0.0399	0.1275	0.2068	0.1833
	65833	0.1432	0.09	0.1295	0.2099	0.1858
	65917	0.1434	0.1328	0.1307	0.2137	0.1893
	6.6	0.1432	0.1566	0.1316	0.2186	0.1942
	66083	0.1432	0.1804	0.1319	0.2273	0.2007
	66167	0.1435	0.2067	0.1324	0.2407	0.2123
	6625	0.1432	0.2197	0.1325	0.2476	0.2242
	66333	0.1432	0.2251	0.1328	0.248	0.2265
	66417	0.1432	0.229	0.1327	0.2471	0.2258
	6.65	0.1434	0.2314	0.133	0.2454	0.2245
	66583	0.1432	0.2335	0.133	0.2445	0.2233
	66667	0.1435	0.2348	0.1328	0.2428	0.2221
	66667	0.1434	0.2348	0.133	-0.1011	-0.0834
	6675	0.1434	0.2351	0.1328	-0.1351	-0.1182
	66833	0.1438	0.2354	0.1328	-0.1432	-0.1272
	66917	0.1435	0.2357	0.1328	-0.149	-0.1334
	6.7	0.1434	0.2364	0.133	-0.1537	-0.1394
	67083	-0.0463	0.236	0.1328	-0.1591	-0.1455
	67167	-0.0925	0.236	0.133	-0.1641	-0.1504
	6725	-0.1055	0.2361	0.133	-0.1685	-0.1545
	67333	-0.1142	0.2358	0.1331	-0.172	-0.1569
	67417	-0.1203	0.2361	0.133	-0.1752	-0.1589
	6.75	-0.1244	0.2366	0.133	-0.1774	-0.1615
	67583	-0.1272	0.2363	0.133	-0.1794	-0.163
	67667	-0.1296	0.2364	0.1331	-0.1806	-0.165
	6775	-0.1308	0.2367	-0.03	-0.1826	-0.1667
	67833	-0.1318	0.2367	-0.0802	-0.1847	-0.1682
	67917	-0.1325	0.237	-0.0951	-0.1867	-0.1704
	6.8	-0.1327	0.2367	-0.1051	-0.189	-0.172
	68083	-0.1331	0.2372	-0.1121	-0.1911	-0.1734
	68167	-0.1334	0.2369	-0.1176	-0.1933	-0.1754
	6825	-0.1334	0.2374	-0.1218	-0.1962	-0.1772
	68333	-0.1331	-0.0991	-0.1249	-0.1984	-0.1798
	68417	-0.133	-0.1011	-0.1273	-0.2013	-0.1826
	6.85	-0.133	-0.111	-0.129	-0.2052	-0.1864
	68583	-0.133	-0.1208	-0.1301	-0.2108	-0.1917
	68667	-0.1333	-0.1283	-0.1312	-0.2207	-0.2004
	6875	-0.1327	-0.1344	-0.1319	-0.2358	-0.2145
	68833	-0.1327	-0.1389	-0.1322	-0.2419	-0.2212
	68917	-0.1324	-0.1423	-0.1328	-0.2416	-0.2215
	6.9	-0.1328	-0.1449	-0.1327	-0.2403	-0.2207
	69083	-0.133	-0.1469	-0.133	-0.239	-0.219
	69167	-0.1327	-0.1482	-0.1333	-0.2381	-0.218
	69167	-0.1328	-0.149	-0.1334	0.0985	0.0866
	6925	-0.1327	-0.1499	-0.1337	0.1359	0.122
	69333	-0.1324	-0.1504	-0.1337	0.1444	0.131
	69417	-0.1324	-0.1507	-0.1339	0.1495	0.1379
	6.95	-0.1327	-0.151	-0.1339	0.1551	0.144
	69583	0.0369	-0.1511	-0.1342	0.1609	0.1487
	69667	0.0871	-0.1518	-0.1342	0.1672	0.1528
	6975	0.1031	-0.1516	-0.1342	0.1724	0.1569
	69833	0.1141	-0.1518	-0.1342	0.1766	0.1595
	69917	0.1223	-0.1522	-0.1345	0.1812	0.1617
	7	0.1295	-0.1524	-0.1345	0.1846	0.1632
	70083	0.1336	-0.1524	-0.1347	0.1865	0.165
	70167	0.1365	-0.1527	-0.1345	0.1888	0.1669
	7025	0.1391	-0.1525	-0.1345	0.1908	0.1687
	70333	0.1408	-0.1527	0.0314	0.193	0.1707
	70417	0.1418	-0.1527	0.0816	0.1949	0.1725
	7.05	0.1426	-0.1528	0.0974	0.1968	0.1745
	70583	0.1435	-0.1528	0.108	0.1992	0.1766
	70667	0.1437	-0.153	0.1151	0.2013	0.1788
	7075	0.1438	-0.1533	0.12	0.2038	0.1817
	70833	0.144	0.0384	0.1232	0.2065	0.1843
	70917	0.1441	0.0887	0.1258	0.2102	0.1875
	7.1	0.144	0.1302	0.1275	0.2151	0.1919
	71083	0.1438	0.1525	0.129	0.2232	0.1984
	71167	0.144	0.1757	0.1299	0.2364	0.2087
	7125	0.1444	0.2009	0.1302	0.2441	0.2209
	71333	0.1444	0.2157	0.1308	0.2447	0.2241
	71417	0.1446	0.2213	0.131	0.2436	0.2232
	7.15	0.1446	0.2256	0.1313	0.2425	0.2221
	71583	0.1444	0.229	0.1313	0.2415	0.221
	71667	0.1446	0.2313	0.1315	0.2403	0.2198
	71667	0.1447	0.2335	0.1316	-0.1005	-0.0832
	7175	0.1446	0.2352	0.1316	-0.1354	-0.1176
	71833	0.1446	0.236	0.1315	-0.1434	-0.1266
	71917	0.1444	0.236	0.1316	-0.1485	-0.1331
	7.2	0.1446	0.2372	0.1315	-0.1525	-0.1386
	72083	0.1444	0.2375	0.1315	-0.1568	-0.1446
	72167	-0.0477	0.238	0.1315	-0.1618	-0.1495
	7225	-0.0932	0.2381	0.1315	-0.1662	-0.1537
	72333	-0.1064	0.239	0.1316	-0.1702	-0.1568
	72417	-0.1157	0.2393	0.1316	-0.1739	-0.1589
	7.25	-0.1209	0.2395	0.1315	-0.1769	-0.1606
	72583	-0.1255	0.2393	0.1316	-0.1786	-0.1623
	72667	-0.1279	0.2393	0.1318	-0.1803	-0.1638
	7275	-0.1302	0.2395	0.1316	-0.182	-0.1652
	72833	-0.1305	0.2395	0.1318	-0.1836	-0.167
	72917	-0.1315	0.2395	-0.0289	-0.1858	-0.169
	7.3	-0.1321	0.2393	-0.0791	-0.1878	-0.1705
	73083	-0.1324	0.2395	-0.0942	-0.1897	-0.1724
	73167	-0.1325	0.2392	-0.1041	-0.192	-0.1743
	7325	-0.1321	0.2393	-0.1112	-0.1943	-0.1763
	73333	-0.1321	0.2386	-0.1165	-0.1971	-0.1783
	73417	-0.1318	-0.1008	-0.1205	-0.1997	-0.1812
	7.35	-0.1315	-0.1041	-0.1235	-0.2033	-0.185
	73583	-0.1308	-0.113	-0.1261	-0.2084	-0.1902
	73667	-0.1307	-0.1217	-0.1275	-0.2177	-0.1989
	7375	-0.1305	-0.129	-0.1289	-0.2325	-0.2119
	73833	-0.1307	-0.1341	-0.1299	-0.2393	-0.2189
	73917	-0.1304	-0.1373	-0.1307	-0.239	-0.219
	7.4	-0.1302	-0.1406	-0.1312	-0.2381	-0.2184
	74083	-0.1304	-0.1418	-0.1315	-0.2367	-0.2172
	74167	-0.1305	-0.1435	-0.1319	-0.2355	-0.216
	74167	-0.1304	-0.1447	-0.1322	0.0979	0.0863
	7425	-0.1304	-0.146	-0.1321	0.1365	0.1225
	74333	-0.1302	-0.147	-0.1324	0.145	0.1304
	74417	-0.1304	-0.1473	-0.1325	0.1505	0.1374
	7.45	-0.1304	-0.1479	-0.1325	0.1556	0.1434
	74583	-0.1302	-0.1485	-0.1327	0.1608	0.1481
	74667	0.035	-0.1489	-0.1328	0.1661	0.1522
	7475	0.0851	-0.1493	-0.133	0.1716	0.1557
	74833	0.1012	-0.1492	-0.133	0.1756	0.1586
	74917	0.1116	-0.1493	-0.1331	0.1794	0.1606
	7.5	0.1192	-0.1496	-0.1333	0.1823	0.1624
	75083	0.1249	-0.1498	-0.1331	0.1846	0.1641
	75167	0.1296	-0.1502	-0.1333	0.1864	0.1656
	7525	0.133	-0.1505	-0.1331	0.1885	0.1675
	75333	0.1353	-0.1507	-0.133	0.1905	0.1693
	75417	0.1388	-0.151	-0.1333	0.1926	0.1711
	7.55	0.1398	-0.151	0.0311	0.1946	0.173
	75583	0.1406	-0.151	0.0811	0.1968	0.1752
	75667	0.1409	-0.1511	0.0964	0.1991	0.1775
	7575	0.1412	-0.1516	0.1063	0.2012	0.1797
	75833	0.1414	-0.1521	0.1133	0.2039	0.1824
	75917	0.1414	0.0367	0.1183	0.2078	0.1853
	7.6	0.1414	0.0867	0.1221	0.2125	0.1896
	76083	0.1415	0.1177	0.1246	0.2206	0.1955
	76167	0.1418	0.1411	0.1264	0.2335	0.2058
	7625	0.1418	0.1719	0.1278	0.2419	0.218
	76333	0.1421	0.1974	0.1287	0.2425	0.2212
	76417	0.142	0.2131	0.1295	0.2416	0.221
	7.65	0.1417	0.2213	0.1299	0.2407	0.2198
	76583	0.1417	0.2244	0.1302	0.2396	0.2187
	76667	0.1418	0.2276	0.1304	0.2383	0.2175
	76667	0.1418	0.2293	0.1304	-0.1008	-0.0822
	7675	0.1417	0.2303	0.1307	-0.1366	-0.1168
	76833	0.1418	0.2314	0.1307	-0.1447	-0.126
	76917	0.1415	0.2325	0.1308	-0.1504	-0.133
	7.7	0.1415	0.2337	0.1308	-0.1551	-0.1383
	77083	0.1417	0.234	0.1308	-0.1589	-0.1437
	77167	0.1418	0.234	0.1307	-0.1637	-0.1487
	7725	-0.0457	0.234	0.1308	-0.1672	-0.1518
	77333	-0.0927	0.2345	0.1308	-0.1701	-0.1545
	77417	-0.1061	0.2345	0.1307	-0.172	-0.1565
	7.75	-0.1151	0.2345	0.131	-0.1742	-0.1582
	77583	-0.1208	0.2354	0.1308	-0.1765	-0.1595
	77667	-0.1249	0.2348	0.1308	-0.1781	-0.1614
	7775	-0.1279	0.2354	0.1308	-0.1798	-0.1624
	77833	-0.1296	0.2355	0.1308	-0.1818	-0.1647
	77917	-0.1307	0.2358	0.131	-0.1838	-0.1669
	7.8	-0.1313	0.2358	0.1308	-0.1859	-0.1687
	78083	-0.1316	0.236	-0.0289	-0.1879	-0.1705
	78167	-0.1321	0.236	-0.0791	-0.1901	-0.1727
	7825	-0.1324	0.2358	-0.0935	-0.1926	-0.1745
	78333	-0.1321	0.2367	-0.1034	-0.1951	-0.1768
	78417	-0.1321	0.2369	-0.1104	-0.1978	-0.1795
	7.85	-0.1319	-0.1023	-0.1159	-0.2015	-0.183
	78583	-0.1321	-0.1	-0.1199	-0.2071	-0.1881
	78667	-0.1318	-0.1125	-0.1231	-0.2171	-0.1963
	7875	-0.1312	-0.124	-0.1255	-0.2317	-0.2088
	78833	-0.1316	-0.1304	-0.127	-0.2367	-0.2163
	78917	-0.1312	-0.1345	-0.1283	-0.2361	-0.2171
	7.9	-0.1312	-0.1388	-0.1292	-0.2352	-0.216
	79083	-0.1307	-0.14	-0.1298	-0.234	-0.2152
	79167	-0.1302	-0.1424	-0.1301	-0.2326	-0.214
	79167	-0.1293	-0.1444	-0.1307	0.0977	0.0858
	7925	-0.1292	-0.1455	-0.1308	0.1351	0.1214
	79333	-0.129	-0.1464	-0.1313	0.1441	0.1296
	79417	-0.1289	-0.1473	-0.1313	0.1507	0.1366
	7.95	-0.1289	-0.1479	-0.1316	0.1551	0.1423
	79583	-0.1289	-0.1482	-0.1316	0.1597	0.1472
	79667	-0.1287	-0.1485	-0.1318	0.1646	0.1513
	7975	0.0335	-0.1487	-0.1319	0.169	0.1547
	79833	0.0837	-0.1489	-0.1321	0.1733	0.1572
	79917	0.0996	-0.149	-0.1321	0.1775	0.1594
	8	0.1104	-0.1493	-0.1322	0.1806	0.1612
	80083	0.1185	-0.1495	-0.1324	0.183	0.1627
	80167	0.1243	-0.1495	-0.1324	0.1852	0.1641
	8025	0.1287	-0.1495	-0.1324	0.187	0.1658
	80333	0.1319	-0.1496	-0.1324	0.189	0.1678
	80417	0.1347	-0.1496	-0.1325	0.1911	0.1695
	8.05	0.1362	-0.1501	-0.1324	0.1931	0.1716
	80583	0.1377	-0.1501	-0.1322	0.1954	0.1734
	80667	0.1385	-0.1504	0.0304	0.1975	0.1756
	8075	0.1391	-0.1505	0.0805	0.1998	0.178
	80833	0.1397	-0.1504	0.0958	0.2024	0.1807
	80917	0.1398	-0.1505	0.1055	0.2059	0.1838
	8.1	0.14	0.0343	0.1125	0.2105	0.1879
	81083	0.1405	0.0843	0.1174	0.2174	0.1936
	81167	0.1406	0.1228	0.1211	0.2293	0.2032
	8125	0.1405	0.1487	0.124	0.2399	0.2154
	81333	0.1405	0.1687	0.1257	0.241	0.2193
	81417	0.1405	0.1919	0.127	0.2401	0.219
	8.15	0.1403	0.2076	0.1278	0.239	0.2181
	81583	0.1405	0.2161	0.1286	0.2383	0.2172
	81667	0.1408	0.2212	0.1292	0.2372	0.2161
	81667	0.1406	0.2241	0.1296	-0.1015	-0.0817
	8175	0.1403	0.2262	0.1296	-0.1376	-0.117
	81833	0.1406	0.228	0.1299	-0.1458	-0.1252
	81917	0.1403	0.2294	0.1296	-0.151	-0.1321
	8.2	0.1405	0.2308	0.1299	-0.1553	-0.1373
	82083	0.1405	0.2311	0.1301	-0.1595	-0.1424
	82167	0.1402	0.2314	0.1301	-0.164	-0.1475
	8225	0.1402	0.232	0.1298	-0.1675	-0.1513
	82333	-0.0443	0.2323	0.1301	-0.1707	-0.1543
	82417	-0.0915	0.2345	0.1301	-0.1733	-0.1563
	8.25	-0.1049	0.2343	0.1299	-0.1754	-0.1583
	82583	-0.1141	0.2348	0.1298	-0.1765	-0.1598
	82667	-0.1197	0.2348	0.1299	-0.1781	-0.1614
	8275	-0.1237	0.2352	0.1299	-0.1797	-0.163
	82833	-0.1266	0.2349	0.1299	-0.1815	-0.1646
	82917	-0.1281	0.2354	0.1301	-0.1833	-0.1666
	8.3	-0.1298	0.2348	0.1299	-0.1852	-0.1684
	83083	-0.1302	0.2345	0.1298	-0.1873	-0.1702
	83167	-0.1308	0.2343	0.1301	-0.1894	-0.1719
	8325	-0.131	0.2348	-0.0278	-0.1919	-0.1739
	83333	-0.1313	0.2346	-0.0779	-0.194	-0.176
	83417	-0.1313	0.2349	-0.0925	-0.1968	-0.1785
	8.35	-0.1313	0.2354	-0.102	-0.2006	-0.1821
	83583	-0.1312	-0.0974	-0.1092	-0.2062	-0.1873
	83667	-0.1312	-0.1026	-0.1145	-0.216	-0.1952
	8375	-0.1312	-0.1135	-0.1185	-0.2305	-0.2082
	83833	-0.1312	-0.1217	-0.1215	-0.2354	-0.2149
	83917	-0.131	-0.1266	-0.1235	-0.2346	-0.2151
	8.4	-0.131	-0.1324	-0.1255	-0.2335	-0.2145
	84083	-0.1308	-0.1369	-0.1267	-0.2325	-0.2137
	84167	-0.1305	-0.1406	-0.1276	-0.2313	-0.2125
	84167	-0.1302	-0.1426	-0.1284	0.0982	0.0855
	8425	-0.1304	-0.1446	-0.1292	0.1348	0.1202
	84333	-0.1301	-0.1461	-0.1296	0.1443	0.1298
	84417	-0.1301	-0.147	-0.1298	0.1502	0.1368
	8.45	-0.1293	-0.1476	-0.1304	0.1551	0.1426
	84583	-0.1286	-0.1484	-0.1304	0.1591	0.1473
	84667	-0.1286	-0.1485	-0.1307	0.1641	0.1514
	8475	-0.1281	-0.1489	-0.131	0.1687	0.1551
	84833	0.033	-0.149	-0.131	0.1733	0.1577
	84917	0.0834	-0.1493	-0.1313	0.1775	0.1598
	8.5	0.0994	-0.1495	-0.1313	0.1803	0.1614
	85083	0.1099	-0.1495	-0.1315	0.1829	0.1627
	85167	0.1179	-0.1501	-0.1315	0.1847	0.1643
	8525	0.1241	-0.1502	-0.1315	0.1865	0.1656
	85333	0.1281	-0.1505	-0.1315	0.1884	0.1675
	85417	0.1319	-0.1507	-0.1316	0.1905	0.1693
	8.55	0.1341	-0.1507	-0.1318	0.1923	0.171
	85583	0.136	-0.151	-0.1318	0.1942	0.173
	85667	0.1374	-0.1513	-0.1316	0.1965	0.1749
	8575	0.1382	-0.1513	-0.1318	0.1986	0.1769
	85833	0.1386	-0.1514	0.0295	0.2012	0.1798
	85917	0.1391	-0.1516	0.0796	0.2047	0.1824
	8.6	0.1392	-0.1516	0.095	0.2094	0.1865
	86083	0.1394	0.0352	0.1049	0.2163	0.1922
	86167	0.1395	0.0854	0.1121	0.2282	0.2015
	8625	0.1397	0.1258	0.117	0.2384	0.2136
	86333	0.1394	0.1501	0.1206	0.2395	0.2172
	86417	0.1395	0.1699	0.1235	0.2387	0.2168
	8.65	0.1395	0.1917	0.1252	0.2377	0.2163
	86583	0.1397	0.2081	0.1266	0.2366	0.2152
	86667	0.1397	0.2174	0.1275	0.2355	0.2142
	86667	0.1398	0.2229	0.1283	-0.1015	-0.0817
	8675	0.1397	0.2259	0.1286	-0.1376	-0.1164
	86833	0.1395	0.2285	0.1289	-0.1461	-0.1264
	86917	0.1395	0.2309	0.1292	-0.1519	-0.1327
	8.7	0.1394	0.2317	0.1295	-0.1557	-0.1383
	87083	0.1392	0.2331	0.1293	-0.1595	-0.1426
	87167	0.1394	0.2337	0.1293	-0.164	-0.1461
	8725	0.1391	0.234	0.1295	-0.1672	-0.1498
	87333	0.1392	0.2345	0.1295	-0.1702	-0.1531
	87417	-0.0431	0.2348	0.1296	-0.1731	-0.1554
	8.75	-0.0907	0.2351	0.1295	-0.1754	-0.1572
	87583	-0.1043	0.2352	0.1296	-0.1769	-0.1586
	87667	-0.113	0.2358	0.1296	-0.1781	-0.1601
	8775	-0.1191	0.2367	0.1296	-0.1792	-0.162
	87833	-0.1234	0.2374	0.1296	-0.1809	-0.1635
	87917	-0.1261	0.238	0.1295	-0.1827	-0.1653
	8.8	-0.1278	0.2381	0.1295	-0.1843	-0.1672
	88083	-0.1289	0.2383	0.1296	-0.1861	-0.1688
	88167	-0.1299	0.2383	0.1293	-0.1879	-0.1705
	8825	-0.1305	0.2381	0.1296	-0.1904	-0.1727
	88333	-0.1307	0.2389	0.1295	-0.1926	-0.1751
	88417	-0.1307	0.2389	-0.028	-0.1954	-0.1778
	8.85	-0.1308	0.239	-0.078	-0.1992	-0.1812
	88583	-0.1302	0.239	-0.0925	-0.2042	-0.1864
	88667	-0.1299	-0.1026	-0.1023	-0.2134	-0.1942
	8875	-0.1301	-0.0982	-0.1093	-0.2279	-0.207
	88833	-0.1301	-0.1128	-0.1145	-0.2334	-0.2132
	88917	-0.1298	-0.1206	-0.1186	-0.2331	-0.2139
	8.9	-0.1298	-0.1283	-0.1214	-0.232	-0.2128
	89083	-0.1296	-0.1337	-0.1243	-0.2309	-0.2113
	89167	-0.1295	-0.1383	-0.126	-0.2297	-0.2105
	89167	-0.1293	-0.1417	-0.127	0.0979	0.0842
	8925	-0.129	-0.1421	-0.1283	0.1345	0.1196
	89333	-0.129	-0.1443	-0.1289	0.144	0.1296
	89417	-0.1284	-0.1456	-0.1293	0.1507	0.1366
	8.95	-0.1283	-0.1472	-0.1296	0.1547	0.1423
	89583	-0.1284	-0.1479	-0.1299	0.1591	0.1467
	89667	-0.1283	-0.1484	-0.1301	0.164	0.1501
	8975	-0.1281	-0.149	-0.1302	0.1685	0.1534
	89833	-0.1281	-0.1495	-0.1302	0.1727	0.1557
	89917	0.0327	-0.1492	-0.1304	0.1775	0.1583
	9	0.0829	-0.1496	-0.1305	0.1812	0.16
	90083	0.0988	-0.1499	-0.1304	0.1835	0.1615
	90167	0.109	-0.1502	-0.1307	0.1853	0.1626
	9025	0.1165	-0.1499	-0.1308	0.1868	0.1644
	90333	0.1229	-0.1502	-0.1308	0.1887	0.1659
	90417	0.1272	-0.1505	-0.1308	0.1902	0.1678
	9.05	0.1304	-0.1507	-0.131	0.1922	0.1696
	90583	0.1325	-0.1505	-0.1307	0.1939	0.1716
	90667	0.1341	-0.1508	-0.131	0.196	0.1736
	9075	0.1356	-0.151	-0.1308	0.198	0.1759
	90833	0.1365	-0.1511	-0.1307	0.2006	0.1783
	90917	0.1369	-0.1519	-0.1307	0.2039	0.1815
	9.1	0.1374	-0.1518	0.0291	0.2087	0.1849
	91083	0.1377	-0.1518	0.0791	0.216	0.1905
	91167	0.138	0.0349	0.0936	0.2284	0.1995
	9125	0.1379	0.0851	0.1037	0.2374	0.2116
	91333	0.138	0.131	0.1104	0.238	0.2158
	91417	0.1379	0.1528	0.1154	0.2374	0.2154
	9.15	0.138	0.1745	0.1192	0.2361	0.2145
	91583	0.1379	0.1972	0.1217	0.2354	0.2136
	91667	0.1377	0.2125	0.1238	0.2341	0.2126
	91667	0.1379	0.2201	0.1254	-0.1017	-0.0811
	9175	0.1377	0.225	0.1264	-0.1394	-0.115
	91833	0.138	0.2273	0.127	-0.1475	-0.1249
	91917	0.138	0.2297	0.1275	-0.1528	-0.1318
	9.2	0.138	0.2316	0.1279	-0.1568	-0.1377
	92083	0.138	0.2329	0.1283	-0.1598	-0.1424
	92167	0.1379	0.2341	0.1283	-0.1629	-0.1464
	9225	0.138	0.2352	0.1284	-0.1664	-0.1507
	92333	0.138	0.2354	0.1286	-0.1695	-0.1533
	92417	0.138	0.2357	0.1287	-0.1719	-0.1556
	9.25	-0.0414	0.2358	0.1286	-0.174	-0.1571
	92583	-0.09	0.2363	0.1287	-0.1754	-0.1588
	92667	-0.1035	0.2358	0.1286	-0.1763	-0.1601
	9275	-0.1121	0.2357	0.1287	-0.1778	-0.1618
	92833	-0.1185	0.236	0.1286	-0.1794	-0.1632
	92917	-0.1217	0.236	0.1289	-0.181	-0.1649
	9.3	-0.1243	0.2364	0.1287	-0.1829	-0.1666
	93083	-0.1266	0.2366	0.1287	-0.1844	-0.1682
	93167	-0.1276	0.2369	0.1289	-0.1865	-0.1701
	9325	-0.1289	0.237	0.1287	-0.1888	-0.1717
	93333	-0.1295	0.2372	0.1287	-0.1913	-0.1739
	93417	-0.1299	0.2366	0.1287	-0.194	-0.1768
	9.35	-0.1301	0.2367	0.1287	-0.1974	-0.1801
	93583	-0.1302	0.2378	-0.0268	-0.2029	-0.185
	93667	-0.1301	0.2377	-0.0771	-0.2119	-0.193
	9375	-0.1295	-0.1026	-0.0916	-0.2264	-0.205
	93833	-0.1292	-0.1035	-0.1014	-0.2317	-0.2117
	93917	-0.129	-0.109	-0.1084	-0.2314	-0.212
	9.4	-0.1287	-0.118	-0.1135	-0.2305	-0.2116
	94083	-0.1284	-0.1255	-0.1174	-0.2293	-0.2105
	94167	-0.1286	-0.1313	-0.1203	-0.2284	-0.2094
	94167	-0.1284	-0.1362	-0.1228	0.0974	0.0837
	9425	-0.1283	-0.14	-0.1246	0.1348	0.12
	94333	-0.1281	-0.1424	-0.1261	0.1443	0.1298
	94417	-0.1279	-0.1443	-0.1269	0.1505	0.1374
	9.45	-0.1281	-0.1456	-0.1276	0.1551	0.1423
	94583	-0.1279	-0.147	-0.1283	0.1588	0.1466
	94667	-0.1278	-0.1479	-0.1286	0.1627	0.1498
	9475	-0.1278	-0.1479	-0.129	0.1669	0.153
	94833	-0.1276	-0.1482	-0.1292	0.1708	0.1554
	94917	-0.1276	-0.1487	-0.1295	0.1746	0.1577
	9.5	0.0318	-0.1489	-0.1295	0.1781	0.1592
	95083	0.0822	-0.1492	-0.1295	0.1806	0.1609
	95167	0.0973	-0.1492	-0.1298	0.1829	0.1624
	9525	0.1077	-0.1492	-0.1298	0.1847	0.164
	95333	0.1153	-0.1496	-0.1302	0.187	0.1653
	95417	0.1205	-0.1501	-0.1299	0.1888	0.167
	9.55	0.1244	-0.1504	-0.1302	0.1907	0.1688
	95583	0.1273	-0.1496	-0.1299	0.1923	0.1707
	95667	0.1299	-0.1498	-0.1301	0.1945	0.1727
	9575	0.1312	-0.1502	-0.1302	0.1963	0.1752
	95833	0.1325	-0.1507	-0.1301	0.1992	0.1777
	95917	0.1333	-0.1505	-0.1299	0.2026	0.1803
	9.6	0.1341	-0.151	-0.1301	0.2071	0.1839
	96083	0.1344	-0.151	-0.1299	0.2142	0.1893
	96167	0.1347	-0.1513	0.0278	0.2264	0.1981
	9625	0.135	0.0341	0.0779	0.2355	0.2102
	96333	0.135	0.0846	0.0933	0.2367	0.214
	96417	0.1351	0.1246	0.1028	0.2358	0.2139
	9.65	0.1353	0.1435	0.1096	0.2348	0.2131
	96583	0.135	0.1603	0.1145	0.2337	0.2122
	96667	0.135	0.1835	0.1185	0.2323	0.2111
	96667	0.135	0.2024	0.1212	-0.1011	-0.0802
	9675	0.1351	0.2142	0.1231	-0.1383	-0.1142
	96833	0.135	0.2189	0.1244	-0.1467	-0.1254
	96917	0.1347	0.2224	0.1254	-0.1518	-0.1325
	9.7	0.135	0.2248	0.1261	-0.1556	-0.1382
	97083	0.1348	0.2267	0.1266	-0.1586	-0.1429
	97167	0.1347	0.2276	0.127	-0.1617	-0.1469
	9725	0.1345	0.2285	0.1273	-0.1649	-0.1502
	97333	0.1347	0.2291	0.1275	-0.1678	-0.1531
	97417	0.1345	0.2306	0.1275	-0.1707	-0.155
	9.75	0.1348	0.2313	0.1276	-0.1731	-0.1566
	97583	-0.0385	0.2311	0.1278	-0.1749	-0.1583
	97667	-0.0871	0.2314	0.1279	-0.1765	-0.1598
	9775	-0.1005	0.2317	0.1279	-0.178	-0.1614
	97833	-0.1093	0.2319	0.1279	-0.1795	-0.163
	97917	-0.1154	0.232	0.1278	-0.181	-0.1646
	9.8	-0.12	0.2319	0.1281	-0.1829	-0.1662
	98083	-0.1228	0.2322	0.1279	-0.1846	-0.1679
	98167	-0.1247	0.2328	0.1279	-0.1865	-0.1698
	9825	-0.1263	0.2322	0.1279	-0.1888	-0.1717
	98333	-0.1273	0.2326	0.1281	-0.1911	-0.1736
	98417	-0.1278	0.2323	0.1278	-0.1939	-0.1765
	9.85	-0.1279	0.2325	0.1278	-0.1972	-0.18
	98583	-0.1286	0.2328	0.1279	-0.2021	-0.1849
	98667	-0.1286	0.2335	0.1279	-0.2103	-0.1928
	9875	-0.1286	0.2335	-0.026	-0.2241	-0.2045
	98833	-0.1286	-0.0991	-0.0761	-0.2306	-0.2107
	98917	-0.1287	-0.1005	-0.0907	-0.2306	-0.2108
	9.9	-0.1287	-0.1112	-0.1005	-0.2299	-0.21
	99083	-0.1284	-0.1209	-0.1077	-0.229	-0.209
	99167	-0.1279	-0.1254	-0.1127	-0.2279	-0.2081
	99167	-0.1279	-0.1304	-0.1165	0.0982	0.0834
	9925	-0.1278	-0.1344	-0.1197	0.1368	0.1186
	99333	-0.1276	-0.1382	-0.1218	0.1461	0.1293
	99417	-0.1276	-0.1411	-0.1238	0.1524	0.1365
	9.95	-0.1273	-0.1435	-0.1249	0.1569	0.1418
	99583	-0.1272	-0.1467	-0.1261	0.1612	0.1464
	99667	-0.1272	-0.1475	-0.1267	0.1653	0.1502
	9975	-0.1273	-0.1475	-0.127	0.1684	0.1534
	99833	-0.127	-0.147	-0.1276	0.1722	0.1559
	99917	-0.1272	-0.1485	-0.1278	0.176	0.1583
	10	-0.1272	-0.1489	-0.1279	0.1803	0.1601
	100083	0.0317	-0.149	-0.1283	0.1826	0.1615
	100167	0.0819	-0.1493	-0.1283	0.1847	0.1627
	10025	0.0974	-0.1495	-0.1287	0.1862	0.1643
	100333	0.108	-0.1505	-0.1287	0.1879	0.1658
	100417	0.1153	-0.1507	-0.1287	0.1896	0.1676
	10.05	0.1205	-0.151	-0.1287	0.1914	0.1695
	100583	0.1241	-0.1511	-0.129	0.1933	0.1713
	100667	0.1272	-0.151	-0.1287	0.1952	0.1736
	10075	0.1295	-0.1513	-0.1289	0.1974	0.1754
	100833	0.131	-0.1511	-0.1292	0.1998	0.1777
	100917	0.1319	-0.1513	-0.129	0.2035	0.1809
	10.1	0.1327	-0.1493	-0.129	0.2081	0.1844
	101083	0.1331	-0.1495	-0.1287	0.2152	0.1896
	101167	0.1334	-0.1493	-0.1287	0.2274	0.1983
	10125	0.1334	-0.1493	-0.1289	0.2358	0.2096
	101333	0.1337	0.0317	0.0268	0.2366	0.2136
	101417	0.1337	0.0819	0.0768	0.2355	0.2129
	10.15	0.1336	0.1139	0.0918	0.2348	0.2123
	101583	0.1337	0.1331	0.1009	0.2337	0.2114
	101667	0.1336	0.1472	0.1078	0.2325	0.2105
	101667	0.1334	0.1727	0.1133	-0.1014	-0.0802
	10175	0.1334	0.1907	0.1167	-0.1397	-0.1162
	101833	0.1334	0.2036	0.1197	-0.1478	-0.1263
	101917	0.1333	0.2113	0.1218	-0.1531	-0.1331
	10.2	0.1333	0.2152	0.1232	-0.1566	-0.1388
	102083	0.133	0.2178	0.1243	-0.1588	-0.1435
	102167	0.1331	0.2193	0.1254	-0.1623	-0.1475
	10225	0.1331	0.221	0.1258	-0.1653	-0.1507
	102333	0.1328	0.2222	0.1264	-0.1684	-0.1536
	102417	0.133	0.2229	0.1264	-0.171	-0.1556
	10.25	0.1328	0.2239	0.1267	-0.1727	-0.1579
	102583	0.133	0.2244	0.1269	-0.1745	-0.1592
	102667	-0.0375	0.2244	0.1266	-0.1759	-0.1608
	10275	-0.0857	0.2248	0.1272	-0.1774	-0.1621
	102833	-0.0994	0.225	0.1273	-0.1789	-0.1633
	102917	-0.1086	0.2253	0.127	-0.1803	-0.1649
	10.3	-0.1157	0.2255	0.1272	-0.182	-0.1664
	103083	-0.1203	0.2261	0.127	-0.1836	-0.1679
	103167	-0.1234	0.2259	0.127	-0.1858	-0.1699
	10325	-0.1252	0.2258	0.1269	-0.1876	-0.1719
	103333	-0.1263	0.2262	0.1269	-0.1899	-0.1737
	103417	-0.1275	0.2262	0.127	-0.1925	-0.1766
	10.35	-0.1279	0.2267	0.1269	-0.196	-0.1801
	103583	-0.1283	0.2264	0.1269	-0.201	-0.1852
	103667	-0.1283	0.227	0.1269	-0.2093	-0.1934
	10375	-0.1283	0.2273	0.1269	-0.2226	-0.2047
	103833	-0.1281	0.2274	0.1269	-0.2287	-0.2094
	103917	-0.1281	-0.0878	-0.0254	-0.2287	-0.2094
	10.4	-0.1279	-0.0976	-0.0756	-0.228	-0.2088
	104083	-0.1275	-0.1089	-0.09	-0.227	-0.2082
	104167	-0.1273	-0.117	-0.0993	-0.2258	-0.2071
	104167	-0.1272	-0.1241	-0.106	0.0976	0.0828
	10425	-0.1269	-0.1304	-0.1113	0.1365	0.1191
	104333	-0.1269	-0.1324	-0.115	0.1461	0.129
	104417	-0.1267	-0.1357	-0.118	0.1521	0.1363
	10.45	-0.1267	-0.1388	-0.1206	0.156	0.1418
	104583	-0.1266	-0.1411	-0.1221	0.1595	0.1458
	104667	-0.1264	-0.1426	-0.1238	0.1633	0.1498
	10475	-0.1263	-0.144	-0.1246	0.1673	0.1527
	104833	-0.1264	-0.1449	-0.1258	0.171	0.1556
	104917	-0.1263	-0.1456	-0.1263	0.1754	0.1577
	10.5	-0.1264	-0.146	-0.1269	0.1785	0.1594
	105083	-0.1264	-0.1466	-0.1272	0.1807	0.1609
	105167	0.0306	-0.1469	-0.1273	0.1824	0.1621
	10525	0.0806	-0.1473	-0.1276	0.1839	0.1633
	105333	0.0961	-0.1473	-0.1279	0.1855	0.1647
	105417	0.1058	-0.1472	-0.1279	0.1875	0.1659
	10.55	0.1135	-0.1476	-0.1279	0.1891	0.1678
	105583	0.1194	-0.1478	-0.1283	0.191	0.1698
	105667	0.1232	-0.1479	-0.1283	0.1926	0.1714
	10575	0.126	-0.1484	-0.1283	0.1946	0.1736
	105833	0.1281	-0.1484	-0.1281	0.1971	0.176
	105917	0.1298	-0.1485	-0.1281	0.2006	0.1788
	10.6	0.1307	-0.1487	-0.1283	0.2052	0.1821
	106083	0.1313	-0.1485	-0.1283	0.2122	0.187
	106167	0.1318	-0.1487	-0.1283	0.2239	0.1951
	10625	0.1324	-0.1487	-0.1283	0.2328	0.2064
	106333	0.1325	-0.1479	-0.1281	0.2338	0.2107
	106417	0.1327	0.0304	-0.1281	0.2331	0.211
	10.65	0.1328	0.0806	0.0256	0.2322	0.2102
	106583	0.1328	0.1244	0.0758	0.2313	0.209
	106667	0.1325	0.1446	0.0906	0.2303	0.2087
	106667	0.1327	0.1612	0.1002	-0.1003	-0.08
	10675	0.1327	0.1777	0.1072	-0.1382	-0.1159
	106833	0.133	0.1934	0.1124	-0.1469	-0.1261
	106917	0.1327	0.2064	0.116	-0.1525	-0.1334
	10.7	0.133	0.212	0.1189	-0.156	-0.1391
	107083	0.1333	0.2155	0.1209	-0.1594	-0.1431
	107167	0.1331	0.2178	0.1225	-0.1623	-0.1467
	10725	0.133	0.2197	0.1238	-0.1652	-0.1493
	107333	0.133	0.221	0.1244	-0.1678	-0.1524
	107417	0.1331	0.2213	0.1249	-0.1695	-0.1543
	10.75	0.133	0.2227	0.1258	-0.1711	-0.156
	107583	0.1328	0.223	0.1258	-0.1727	-0.1572
	107667	0.1328	0.2235	0.1263	-0.1736	-0.1588
	10775	-0.0367	0.2238	0.1263	-0.1754	-0.1603
	107833	-0.0857	0.2239	0.1266	-0.1763	-0.1617
	107917	-0.0994	0.2239	0.1264	-0.1783	-0.1633
	10.8	-0.1086	0.2241	0.1263	-0.1798	-0.1652
	108083	-0.1153	0.2245	0.1263	-0.1817	-0.1666
	108167	-0.1196	0.2244	0.1264	-0.1833	-0.1682
	10825	-0.1228	0.2247	0.1263	-0.1853	-0.1704
	108333	-0.1247	0.2247	0.1263	-0.1875	-0.1727
	108417	-0.1264	0.2247	0.1263	-0.1907	-0.1752
	10.85	-0.1272	0.2251	0.1266	-0.1939	-0.1788
	108583	-0.1273	0.2256	0.1266	-0.1984	-0.1838
	108667	-0.1281	0.2253	0.1264	-0.207	-0.1914
	10875	-0.1284	0.2256	0.1266	-0.22	-0.2024
	108833	-0.1286	0.2262	0.1267	-0.2271	-0.2079
	108917	-0.1284	0.2261	0.1264	-0.2274	-0.2082
	10.9	-0.1284	-0.0881	0.1264	-0.2264	-0.2076
	109083	-0.1281	-0.0933	-0.0242	-0.2253	-0.2068
	109167	-0.1281	-0.1067	-0.0744	-0.2247	-0.2056
	109167	-0.1279	-0.1164	-0.0889	0.0976	0.0819
	10925	-0.1278	-0.1232	-0.0985	0.1362	0.1165
	109333	-0.1276	-0.131	-0.1055	0.146	0.127
	109417	-0.1275	-0.1351	-0.1104	0.1518	0.1344
	10.95	-0.1273	-0.1382	-0.1147	0.1559	0.1402
	109583	-0.1272	-0.1409	-0.1177	0.1601	0.145
	109667	-0.1272	-0.1426	-0.1202	0.1638	0.1493
	10975	-0.1272	-0.1447	-0.122	0.1675	0.1522
	109833	-0.127	-0.1458	-0.1234	0.1714	0.1553
	109917	-0.1267	-0.1463	-0.1247	0.1748	0.1572
	11	-0.1269	-0.1466	-0.1254	0.1778	0.1592
	110083	-0.127	-0.1473	-0.1258	0.1804	0.1604
	110167	-0.1269	-0.1469	-0.1263	0.1821	0.1618
	11025	0.0312	-0.1463	-0.1264	0.1841	0.1633
	110333	0.0814	-0.1466	-0.1269	0.1856	0.1647
	110417	0.0958	-0.1466	-0.127	0.187	0.1659
	11.05	0.1061	-0.1466	-0.127	0.1885	0.1678
	110583	0.1131	-0.1463	-0.1272	0.1902	0.1695
	110667	0.1192	-0.1467	-0.1272	0.192	0.1714
	11075	0.1231	-0.147	-0.127	0.194	0.1734
	110833	0.126	-0.147	-0.127	0.1968	0.1754
	110917	0.1283	-0.1473	-0.1272	0.2004	0.1781
	11.1	0.1301	-0.1475	-0.1275	0.2049	0.1815
	111083	0.1308	-0.1476	-0.1273	0.2122	0.1862
	111167	0.1318	-0.1475	-0.1276	0.2245	0.194
	11125	0.1322	-0.1476	-0.1276	0.2328	0.2052
	111333	0.133	-0.1476	-0.1276	0.2331	0.2099
	111417	0.1331	-0.1482	-0.1275	0.2323	0.21
	11.15	0.1333	0.03	-0.1273	0.2316	0.2091
	111583	0.1333	0.0802	-0.1273	0.2306	0.2084
	111667	0.1334	0.1255	0.024	0.2297	0.2073
	111667	0.1333	0.1443	0.0741	-0.1006	-0.0793
	11175	0.1334	0.1597	0.0896	-0.1386	-0.1153
	111833	0.1334	0.1748	0.0991	-0.1481	-0.1258
	111917	0.1333	0.1922	0.1063	-0.1533	-0.1327
	11.2	0.1334	0.2032	0.1113	-0.1565	-0.1376
	112083	0.1333	0.2102	0.1153	-0.1597	-0.142
	112167	0.1333	0.214	0.118	-0.1621	-0.1461
	11225	0.1331	0.2168	0.1202	-0.165	-0.1492
	112333	0.1331	0.2183	0.1217	-0.1675	-0.1524
	112417	0.1331	0.2195	0.1229	-0.1696	-0.1545
	11.25	0.1331	0.221	0.1238	-0.1717	-0.1566
	112583	0.1331	0.2215	0.1244	-0.1736	-0.1585
	112667	0.1333	0.2224	0.1249	-0.1748	-0.1595
	11275	0.133	0.223	0.1252	-0.1762	-0.1611
	112833	-0.0367	0.2244	0.1252	-0.1769	-0.1626
	112917	-0.0857	0.2248	0.1257	-0.1785	-0.1638
	11.3	-0.0991	0.225	0.1254	-0.1803	-0.1655
	113083	-0.1083	0.2242	0.1254	-0.1817	-0.167
	113167	-0.1145	0.2244	0.1257	-0.1835	-0.1687
	11325	-0.1191	0.2239	0.126	-0.1856	-0.1704
	113333	-0.1221	0.2241	0.1255	-0.1881	-0.1728
	113417	-0.1241	0.2242	0.1257	-0.1905	-0.1756
	11.35	-0.1257	0.2247	0.1258	-0.1942	-0.1791
	113583	-0.1264	0.2253	0.1255	-0.1989	-0.1839
	113667	-0.127	0.225	0.1257	-0.207	-0.192
	11375	-0.1275	0.2251	0.1258	-0.2203	-0.2027
	113833	-0.1278	0.2253	0.1258	-0.2268	-0.2071
	113917	-0.1284	0.2253	0.1257	-0.2265	-0.2071
	11.4	-0.1281	0.2256	0.1255	-0.2258	-0.2067
	114083	-0.1281	-0.0904	0.1257	-0.225	-0.2058
	114167	-0.1283	-0.0996	0.1257	-0.2241	-0.2047
	114167	-0.1284	-0.1098	-0.0237	0.0974	0.0817
	11425	-0.1284	-0.1144	-0.0738	0.1363	0.117
	114333	-0.1279	-0.1218	-0.0883	0.1464	0.1278
	114417	-0.1278	-0.1278	-0.0977	0.1531	0.1353
	11.45	-0.1276	-0.1318	-0.1049	0.158	0.1403
	114583	-0.1276	-0.1354	-0.1102	0.1614	0.1449
	114667	-0.1276	-0.1389	-0.1142	0.1649	0.1487
	11475	-0.1273	-0.1414	-0.1171	0.1681	0.1513
	114833	-0.1273	-0.1431	-0.1196	0.1716	0.1542
	114917	-0.1272	-0.1441	-0.1215	0.1756	0.1566
	11.5	-0.127	-0.1449	-0.1229	0.1783	0.1582
	115083	-0.1269	-0.1452	-0.1238	0.1807	0.1601
	115167	-0.1269	-0.1461	-0.1246	0.1826	0.1617
	11525	-0.1267	-0.146	-0.1254	0.1838	0.1627
	115333	0.0309	-0.1467	-0.1257	0.1855	0.1643
	115417	0.0811	-0.1472	-0.1261	0.1867	0.1658
	11.55	0.0961	-0.1469	-0.1261	0.1884	0.1673
	115583	0.1057	-0.147	-0.1263	0.1897	0.1688
	115667	0.113	-0.1473	-0.1264	0.1919	0.1707
	11575	0.118	-0.1472	-0.1266	0.1937	0.1727
	115833	0.1226	-0.1472	-0.1266	0.1963	0.1749
	115917	0.1255	-0.1472	-0.1269	0.1997	0.1775
	11.6	0.1273	-0.1475	-0.1267	0.2042	0.181
	116083	0.1286	-0.1472	-0.1267	0.2116	0.1856
	116167	0.1301	-0.1476	-0.1267	0.2238	0.1928
	11625	0.131	-0.1476	-0.1267	0.2316	0.2033
	116333	0.1316	-0.1476	-0.1266	0.232	0.2084
	116417	0.1321	-0.1478	-0.1267	0.2313	0.2082
	11.65	0.1322	-0.1479	-0.1264	0.2305	0.2081
	116583	0.1327	0.0306	-0.1266	0.2293	0.2071
	116667	0.1325	0.0806	-0.1266	0.2284	0.2065
	116667	0.1325	0.1238	-0.1266	-0.0999	-0.0788
	11675	0.1328	0.1402	0.0236	-0.1389	-0.1156
	116833	0.1325	0.154	0.0739	-0.1482	-0.126
	116917	0.1325	0.1684	0.0889	-0.1536	-0.1327
	11.7	0.1325	0.1838	0.0985	-0.1568	-0.1383
	117083	0.1325	0.1969	0.1057	-0.1597	-0.1429
	117167	0.1328	0.2065	0.111	-0.1629	-0.1463
	11725	0.1327	0.211	0.1147	-0.1656	-0.1498
	117333	0.1328	0.2142	0.1176	-0.1682	-0.1525
	117417	0.1328	0.2163	0.1199	-0.1701	-0.1547
	11.75	0.1328	0.2181	0.1212	-0.1719	-0.1562
	117583	0.1327	0.2186	0.1225	-0.1733	-0.1579
	117667	0.1324	0.22	0.1231	-0.1746	-0.1594
	11775	0.1325	0.2206	0.1237	-0.176	-0.1608
	117833	0.1325	0.2212	0.1241	-0.1771	-0.1621
	117917	-0.0358	0.2216	0.1243	-0.1786	-0.1638
	11.8	-0.0848	0.2218	0.1244	-0.18	-0.1652
	118083	-0.0983	0.2221	0.1247	-0.1814	-0.1667
	118167	-0.1073	0.2227	0.1247	-0.183	-0.1685
	11825	-0.1135	0.2233	0.1249	-0.1853	-0.1702
	118333	-0.118	0.223	0.1249	-0.1873	-0.1727
	118417	-0.1211	0.2238	0.125	-0.1902	-0.1754
	11.85	-0.1237	0.2238	0.1249	-0.1933	-0.1789
	118583	-0.1246	0.2238	0.1252	-0.1981	-0.1838
	118667	-0.1264	0.2247	0.1249	-0.2067	-0.1913
	11875	-0.1264	0.225	0.1249	-0.219	-0.202
	118833	-0.1267	0.225	0.125	-0.2251	-0.2055
	118917	-0.1267	0.225	0.1247	-0.225	-0.2061
	11.9	-0.1269	0.2248	0.1249	-0.2242	-0.205
	119083	-0.127	0.2248	0.1252	-0.2235	-0.2044
	119167	-0.1269	-0.0867	0.125	-0.2222	-0.2038
	119167	-0.127	-0.0961	0.1249	0.0956	0.0809
	11925	-0.1269	-0.1072	0.125	0.1357	0.1168
	119333	-0.1267	-0.1154	-0.0227	0.1463	0.1273
	119417	-0.1267	-0.1226	-0.0727	0.1521	0.1341
	11.95	-0.1266	-0.127	-0.0872	0.1574	0.1395
	119583	-0.1266	-0.1315	-0.097	0.1612	0.1438
	119667	-0.1263	-0.1351	-0.1038	0.1647	0.1473
	11975	-0.1263	-0.1382	-0.1087	0.1679	0.1501
	119833	-0.1264	-0.14	-0.1128	0.1713	0.1524
	119917	-0.1264	-0.1431	-0.1159	0.1745	0.1548
	12	-0.126	-0.1444	-0.1185	0.1774	0.1571
	120083	-0.1263	-0.1446	-0.1203	0.1795	0.1586
	120167	-0.1261	-0.1455	-0.1217	0.1817	0.1598
	12025	-0.1261	-0.1461	-0.1229	0.1832	0.1609
	120333	-0.1263	-0.1464	-0.1235	0.1847	0.1626
	120417	0.0292	-0.1463	-0.1244	0.1861	0.1638
	12.05	0.0794	-0.1467	-0.1246	0.1879	0.1656
	120583	0.095	-0.1466	-0.125	0.1894	0.1679
	120667	0.1051	-0.1466	-0.1252	0.1914	0.1696
	12075	0.1122	-0.1466	-0.1257	0.1933	0.1716
	120833	0.1174	-0.1472	-0.126	0.1958	0.1734
	120917	0.1218	-0.1472	-0.126	0.1992	0.1762
	12.1	0.1244	-0.1476	-0.126	0.2036	0.1792
	121083	0.1266	-0.1475	-0.1263	0.2107	0.1833
	121167	0.1281	-0.147	-0.1261	0.2222	0.1899
	12125	0.1295	-0.1473	-0.1261	0.2306	0.2
	121333	0.1302	-0.1478	-0.1263	0.2309	0.2068
	121417	0.1307	-0.1476	-0.1263	0.2303	0.2073
	12.15	0.1312	-0.1478	-0.1261	0.2296	0.2065
	121583	0.1315	-0.1475	-0.1263	0.2287	0.2062
	121667	0.1321	0.0301	-0.1261	0.2279	0.2053
	121667	0.1322	0.0803	-0.1261	-0.1	-0.0787
	12175	0.1324	0.1196	-0.126	-0.1389	-0.1145
	121833	0.1321	0.1392	-0.1263	-0.1478	-0.1254
	121917	0.1322	0.1536	0.0231	-0.1536	-0.1324
	12.2	0.1324	0.1678	0.0733	-0.1574	-0.138
	122083	0.1328	0.1832	0.0883	-0.1604	-0.1421
	122167	0.1327	0.1946	0.0977	-0.1627	-0.1453
	12225	0.1327	0.2006	0.1048	-0.1653	-0.149
	122333	0.1328	0.2049	0.1099	-0.1681	-0.1521
	122417	0.133	0.2076	0.1141	-0.1701	-0.1547
	12.25	0.133	0.2099	0.117	-0.1722	-0.1565
	122583	0.1328	0.2114	0.1191	-0.1737	-0.158
	122667	0.1328	0.2129	0.1205	-0.1745	-0.1592
	12275	0.1327	0.2136	0.1217	-0.1757	-0.1604
	122833	0.1327	0.2142	0.1228	-0.1763	-0.162
	122917	0.1327	0.2148	0.1232	-0.178	-0.1637
	12.3	-0.0356	0.2152	0.1238	-0.1792	-0.1652
	123083	-0.0842	0.2155	0.1241	-0.1807	-0.1669
	123167	-0.0977	0.2157	0.1244	-0.1826	-0.1687
	12325	-0.1069	0.2158	0.1246	-0.1843	-0.1702
	123333	-0.1135	0.216	0.1244	-0.1865	-0.1724
	123417	-0.1179	0.2163	0.1247	-0.1893	-0.1752
	12.35	-0.1212	0.216	0.1246	-0.1926	-0.1789
	123583	-0.1232	0.2164	0.1247	-0.1974	-0.1836
	123667	-0.1249	0.2171	0.1246	-0.2053	-0.1916
	12375	-0.126	0.2172	0.1244	-0.2175	-0.2013
	123833	-0.1267	0.2171	0.1247	-0.2244	-0.2052
	123917	-0.1269	0.2172	0.1249	-0.2241	-0.2052
	12.4	-0.127	0.2172	0.1247	-0.2224	-0.2044
	124083	-0.1272	0.2174	0.1247	-0.2216	-0.2033
	124167	-0.1267	0.2174	0.1246	-0.2207	-0.2029
	124167	-0.1272	-0.0816	0.1246	0.0951	0.0806
	12425	-0.1272	-0.0959	0.1246	0.1362	0.1157
	124333	-0.1273	-0.1083	0.1244	0.1463	0.1275
	124417	-0.1273	-0.1159	0.1244	0.1525	0.1348
	12.45	-0.1269	-0.1235	-0.022	0.1575	0.1405
	124583	-0.1266	-0.129	-0.0723	0.1614	0.1453
	124667	-0.1267	-0.1336	-0.0866	0.1652	0.149
	12475	-0.1263	-0.1366	-0.0965	0.1685	0.1516
	124833	-0.1261	-0.1385	-0.1035	0.1719	0.1545
	124917	-0.1261	-0.1415	-0.109	0.1752	0.1571
	12.5	-0.126	-0.1434	-0.1131	0.1783	0.1589
	125083	-0.126	-0.1443	-0.116	0.1807	0.1601
	125167	-0.1258	-0.1447	-0.1186	0.1826	0.1618
	12525	-0.1258	-0.144	-0.1203	0.1841	0.1629
	125333	-0.1257	-0.145	-0.1215	0.1853	0.1646
	125417	-0.1255	-0.1453	-0.1225	0.1864	0.1656
	12.55	0.0295	-0.1456	-0.1235	0.1881	0.1672
	125583	0.0797	-0.1461	-0.1241	0.1896	0.169
	125667	0.0945	-0.1461	-0.1244	0.191	0.1708
	12575	0.1052	-0.1461	-0.1249	0.1931	0.1727
	125833	0.113	-0.1466	-0.1249	0.1955	0.1748
	125917	0.1183	-0.1467	-0.1252	0.1989	0.1771
	12.6	0.1221	-0.1469	-0.1252	0.2033	0.1803
	126083	0.1249	-0.1469	-0.1254	0.2103	0.1849
	126167	0.1272	-0.1469	-0.1255	0.2218	0.1922
	12625	0.1289	-0.1482	-0.1255	0.2296	0.2021
	126333	0.1301	-0.1469	-0.1257	0.2302	0.2067
	126417	0.1308	-0.1482	-0.1255	0.2297	0.2068
	12.65	0.1315	-0.1481	-0.1258	0.2288	0.2061
	126583	0.1318	-0.1484	-0.1257	0.2279	0.2053
	126667	0.1322	-0.1487	-0.1258	0.2271	0.2042
	126667	0.1324	0.0307	-0.1255	-0.0999	-0.0782
	12675	0.1325	0.0808	-0.1257	-0.1385	-0.1154
	126833	0.1325	0.1145	-0.1258	-0.1479	-0.1257
	126917	0.1328	0.1331	-0.1254	-0.1533	-0.1321
	12.7	0.1328	0.1495	-0.1255	-0.1572	-0.1382
	127083	0.1327	0.1641	0.022	-0.1594	-0.1423
	127167	0.1327	0.178	0.0721	-0.1618	-0.1461
	12725	0.1325	0.1894	0.0871	-0.1635	-0.1493
	127333	0.1324	0.1969	0.0971	-0.1669	-0.1518
	127417	0.1327	0.201	0.1043	-0.169	-0.1536
	12.75	0.1324	0.2044	0.1096	-0.171	-0.1557
	127583	0.1322	0.2067	0.1136	-0.1725	-0.1569
	127667	0.1321	0.2081	0.1164	-0.1737	-0.1585
	12775	0.1322	0.2131	0.1185	-0.1749	-0.1598
	127833	0.1324	0.2139	0.1203	-0.1762	-0.1618
	127917	0.1324	0.2143	0.1214	-0.1772	-0.1633
	12.8	0.1324	0.2149	0.1225	-0.1786	-0.1649
	128083	-0.0347	0.2155	0.1229	-0.1801	-0.1664
	128167	-0.0834	0.216	0.1235	-0.1818	-0.1679
	12825	-0.0971	0.2163	0.1238	-0.1838	-0.1699
	128333	-0.1058	0.2166	0.1238	-0.1859	-0.1722
	128417	-0.1124	0.2171	0.124	-0.1884	-0.1742
	12.85	-0.1171	0.2174	0.1241	-0.1916	-0.1777
	128583	-0.1202	0.2174	0.1241	-0.1963	-0.1824
	128667	-0.1226	0.2171	0.1241	-0.2038	-0.1899
	12875	-0.1241	0.2174	0.124	-0.2155	-0.1998
	128833	-0.1258	0.2172	0.1241	-0.2226	-0.2039
	128917	-0.1263	0.2177	0.1243	-0.2227	-0.2039
	12.9	-0.1267	0.2177	0.1241	-0.2222	-0.2035
	129083	-0.1269	0.2178	0.1243	-0.2213	-0.2026
	129167	-0.1272	0.2177	0.1241	-0.2206	-0.2018
	129167	-0.1273	0.2175	0.1241	0.0956	0.0802
	12925	-0.1275	-0.0808	0.1238	0.1362	0.1173
	129333	-0.1273	-0.0932	0.124	0.146	0.1286
	129417	-0.1275	-0.1044	0.1241	0.1522	0.1357
	12.95	-0.1273	-0.1141	0.1241	0.1568	0.1411
	129583	-0.1272	-0.1212	0.124	0.1604	0.1447
	129667	-0.1272	-0.1272	-0.0213	0.1633	0.1482
	12975	-0.1272	-0.1315	-0.0713	0.1659	0.1508
	129833	-0.1272	-0.1351	-0.0861	0.1688	0.1539
	129917	-0.127	-0.1379	-0.0956	0.1724	0.1563
	13	-0.1269	-0.1408	-0.1029	0.1756	0.1582
	130083	-0.1269	-0.1423	-0.1083	0.1789	0.16
	130167	-0.1266	-0.1437	-0.1125	0.1807	0.1612
	13025	-0.1264	-0.1443	-0.1154	0.1823	0.1624
	130333	-0.1264	-0.1446	-0.118	0.1839	0.1637
	130417	-0.1264	-0.1452	-0.1197	0.1855	0.1649
	13.05	-0.1263	-0.1456	-0.1212	0.1868	0.1669
	130583	0.0291	-0.1455	-0.1221	0.1884	0.1679
	130667	0.0791	-0.1455	-0.1228	0.1902	0.1701
	13075	0.0948	-0.1461	-0.1234	0.192	0.1717
	130833	0.1052	-0.1463	-0.1238	0.1949	0.1742
	130917	0.1127	-0.1464	-0.1244	0.1978	0.1762
	13.1	0.1182	-0.1463	-0.1246	0.2026	0.1794
	131083	0.1223	-0.1463	-0.1246	0.2093	0.1836
	131167	0.125	-0.1466	-0.1247	0.2204	0.1908
	13125	0.1273	-0.1464	-0.1247	0.2282	0.2006
	131333	0.1289	-0.1467	-0.1252	0.229	0.2055
	131417	0.1304	-0.1466	-0.1247	0.2285	0.2055
	13.15	0.1308	-0.1469	-0.1252	0.2276	0.2047
	131583	0.1316	-0.1466	-0.125	0.2268	0.2041
	131667	0.1318	-0.1464	-0.125	0.2259	0.2033
	131667	0.1319	-0.147	-0.1252	-0.0993	-0.0777
	13175	0.1325	0.0286	-0.1252	-0.138	-0.1136
	131833	0.1325	0.0788	-0.125	-0.1478	-0.1244
	131917	0.1327	0.1192	-0.125	-0.1539	-0.1316
	13.2	0.1324	0.1394	-0.1254	-0.1577	-0.1369
	132083	0.1325	0.1566	-0.1252	-0.1608	-0.1414
	132167	0.1327	0.1713	-0.125	-0.1626	-0.1453
	13225	0.1328	0.1853	0.0211	-0.1652	-0.1482
	132333	0.1327	0.1965	0.0712	-0.1678	-0.1518
	132417	0.1325	0.2024	0.0864	-0.1695	-0.154
	13.25	0.1322	0.2064	0.0962	-0.1714	-0.1556
	132583	0.1324	0.209	0.1032	-0.1728	-0.1569
	132667	0.1322	0.211	0.1087	-0.174	-0.1586
	13275	0.1321	0.2125	0.1127	-0.1754	-0.16
	132833	0.1324	0.2136	0.1153	-0.1765	-0.1614
	132917	0.1324	0.2149	0.1173	-0.1774	-0.1627
	13.3	0.1322	0.2155	0.1191	-0.1788	-0.1643
	133083	0.1318	0.2161	0.1205	-0.1804	-0.1659
[truncated: 24,974 more rows]

## Sheet: EIS
Name	Cycle number	R_Interphase	R_Interphase	R_Interphase
[truncated: 21 more rows]

[truncated: 1 more sheets: NMC622||Li cells]
